# Supplementary material for: Enhanced Electrophoretic Depletion of Sodium Dodecyl Sulfate with Methanol for Membrane Proteome Analysis by Mass Spectrometry
Source: Proteomes. 2024 Feb 2;12(1):5. doi: 10.3390/proteomes12010005 (PMC10885059; doi:10.3390/proteomes12010005)
Supplement: Supplementary file 1 [file proteomes-12-00005-s001.zip › Table S1_protein ids.xlsx]

## Sheet: Complete list
COUNT	Accession	Protein Descriptor [OS=Saccharomyces cerevisiae S288C]	Found in 40% MeOH (Run 1)	Found in 40% MeOH (Run 2)	Found in water (Run 1)	Found in water (Run 2)	Protein FDR Confidence: Combined	Exp. q-value: Combined	Sum PEP Score	Coverage [%]	# Peptides	# PSMs	# Unique Peptides	# AAs	MW [kDa]	calc. pI	Score Sequest HT: Sequest HT	# Peptides (by Search Engine): Sequest HT	# Razor Peptides	Abundance Ratio: 40%MeOH/water	Abundance Ratio Adj. P-Value: 40% MeOH/water	Abundance Ratio Variability [%]: 40% MeOH / water	Abundances (Grouped): 40% MeOH	Abundances (Grouped): water	Abundances (Grouped) CV [%]: 40% MeOH	Abundances (Grouped) CV [%]: water	Abundance: Run 1, 40% MeOH	Abundance: Run 2, 40% MeOH	Abundance: Run 1, water	Abundance: Run 2, water	# Protein Groups	Modifications
1	Q99190	Very-long-chain enoyl-CoA reductase	Not Found	Not Found	High	High	High	0.006	2.706	3	1	2	1	310	36.7	9.54	4.08	1	0	0.01	8.02532e-17			200		34.91			2.80553e+06	921240	1
2	P38801	Exosome complex protein LRP1	Not Found	Not Found	High	High	High	0.001	3.26	7	1	2	1	184	21	9.58	4.31	1	0	0.01	8.02532e-17			200		43.11			22675.3	23137.3	1
3	Q05164	Haze protective factor 1	Not Found	Not Found	High	High	Medium	0.036	1.73	1	1	2	1	967	94.6	4.26	3.33	1	0	0.01	8.02532e-17			200		57.53			26665.2	34379	1
4	Q03337	Trafficking protein particle complex subunit 31	Not Found	Not Found	High	Not Found	Medium	0.022	2.02	3	1	1	1	283	31.7	7.46	1.64	1	0	0.01	8.02532e-17			200					7944.57		1
5	Q02969	Peroxisomal membrane protein PEX25	Not Found	Not Found	High	Not Found	High	0.01	2.332	3	1	1	1	394	44.9	9.03	1.9	1	0	0.01	8.02532e-17			200					23898.5		1
6	Q12222	Glycogen synthase kinase-3 homolog YGK3	Not Found	Not Found	High	Not Found	Medium	0.026	1.927	3	1	1	1	375	43.2	7.55	2.1	1	0	0.01	8.02532e-17			200					588132		1
7	P35732	RNA polymerase II degradation factor 1	Not Found	Not Found	High	Not Found	Medium	0.026	1.932	3	1	1	1	738	83.9	4.98	0	1	0	0.01	8.02532e-17			200					19961.6		1
8	P38070	Serine/threonine-protein kinase YPK3	Not Found	Not Found	High	Not Found	Medium	0.035	1.75	2	1	1	1	525	59.6	7.81	0	1	0	0.01	8.02532e-17			200					8210.44		1
9	P31787	Acyl-CoA-binding protein	Not Found	Not Found	High	Not Found	High	0.006	2.513	14	1	1	1	87	10.1	4.92	2.64	1	0	0.01	8.02532e-17			200					32695.8		1
10	P43634	Activatory protein CHA4	Not Found	Not Found	High	Peak Found	Medium	0.011	2.278	1	1	1	1	648	74.3	6.98	0	1	0	0.01	8.02532e-17			200		53.61			12218.3	2990.47	1
11	P40564	DnaJ-like protein 1	Not Found	Not Found	High	Peak Found	High	0.007	2.448	3	1	1	1	432	48.5	5.2	2.36	1	0	0.01	8.02532e-17			200		17.18			21445.1	14882.4	1
12	P09950	5-aminolevulinate synthase, mitochondrial	Not Found	Not Found	High	Peak Found	High	0.01	2.351	2	1	1	1	548	59.3	7.52	0	1	0	0.01	8.02532e-17			200		42.44			9564.09	9657.38	1
13	P36169	Suppressor of lethality of KEX2 GAS1 double null mutant protein 1	Not Found	Not Found	High	Peak Found	Medium	0.024	1.972	2	1	1	1	355	39.8	5.96	0	1	0	0.01	8.02532e-17			200		42.05			21433.1	21513.8	1
14	Q05518	Protein PAL1	Not Found	Not Found	High	Peak Found	High	0.004	2.737	3	1	1	1	499	55	9.5	2.3	1	0	0.01	8.02532e-17			200		11.53			18589.3	11899.9	1
15	P53067	Importin subunit beta-5	Not Found	Not Found	High	Peak Found	Medium	0.029	1.862	3	1	1	1	1004	113.8	4.67	3.21	1	0	0.01	8.02532e-17			200		33.85			39134.1	13056.9	1
16	P40468	Cell morphogenesis protein PAG1	Not Found	Not Found	High	Peak Found	Medium	0.019	2.117	0	1	1	1	2376	269.7	6.34	0	1	0	0.01	8.02532e-17			200		33.11			7109.91	6228.08	1
17	P52870	Protein transport protein SBH1	Not Found	Not Found	High	Peak Found	High	0.001	3.199	12	1	1	1	82	8.7	10.52	1.62	1	0	0.01	8.02532e-17			200		28.12			108462	88226.5	1
18	P19657	Plasma membrane ATPase 2	Not Found	Not Found	Peak Found	High	High	0	173.046	27	24	280	1	947	102.1	5.03	728.44	24	0	0.01	8.02532e-17			200		116.26			2601.3	14480.8	1
19	P53184	Nicotinamidase	Not Found	Not Found	Peak Found	High	Medium	0.017	2.168	6	1	1	1	216	25	6.27	1.7	1	0	0.01	8.02532e-17			200		23.71			51944.4	39613.9	1
20	Q04835	Uncharacterized membrane protein YMR253C	Not Found	Not Found	Peak Found	High	Medium	0.035	1.74	3	1	1	1	414	46.6	8.76	2.12	1	0	0.01	8.02532e-17			200		20.97			1082431	793318	1
21	Q06344	Pre-rRNA-processing protein ESF1	Not Found	Not Found	Peak Found	High	Medium	0.035	1.733	2	1	1	1	628	72.4	5.26	0	1	0	0.01	8.02532e-17			200		56.02			27403.5	34443.7	1
60	P46784	40S ribosomal protein S10-B	High	High	High	Not Found	High	0	6.983	17	1	3	1	105	12.7	9.07	10.15	1	0	100	8.02532e-17		200		25.05		1.61501e+06	1.87697e+06			1
61	Q06991	Protein PUN1	High	High	High	Not Found	High	0.004	2.729	7	1	3	1	263	29.2	8.51	8.79	1	0	100	8.02532e-17		200		56.64		53906.1	38362.9			1
62	P32839	Mitochondrial chaperone BCS1	High	High	Not Found	Not Found	High	0	4.005	3	1	2	1	456	51.1	8.78	4.32	1	0	100	8.02532e-17		200		1.29		57064.6	93150.3			1
63	Q12690	60S ribosomal protein L13-A	High	High	Not Found	Not Found	High	0	51.373	45	9	81	1	199	22.5	11.18	201.63	9	0	100	8.02532e-17		200		70.02		1.37298e+06	770809			1
64	Q06142	Importin subunit beta-1	High	High	Not Found	Not Found	Medium	0.014	2.208	1	1	2	1	861	94.7	4.64	4.4	1	0	100	8.02532e-17		200					95915.8			1
65	P38992	Sphingolipid C4-hydroxylase SUR2	High	High	Not Found	Not Found	High	0.004	2.827	3	1	2	1	349	40.7	8.41	3.98	1	0	100	8.02532e-17		200		34.73		60767.2	166797			1
66	Q12220	U3 small nucleolar RNA-associated protein 12	High	High	Not Found	Not Found	High	0	7.118	3	2	3	2	943	106.3	6.02	5.62	2	0	100	8.02532e-17		200		3.6		82037	129622			1
67	Q05031	Mannan endo-1,6-alpha-mannosidase DFG5	High	High	Not Found	Not Found	High	0	8.276	3	1	5	1	458	50.5	4.75	6.65	1	0	100	8.02532e-17		200		0.03		63440.9	105432			1
68	P24004	Peroxisomal ATPase PEX1	High	High	Not Found	Not Found	High	0.006	2.631	1	1	2	1	1043	117.2	6.95	4.48	1	0	100	8.02532e-17		200		6.08		39054.5	59580.5			1
69	P32454	Aminopeptidase 2, mitochondrial	High	High	Not Found	Not Found	Medium	0.011	2.307	2	1	2	1	952	107.7	8.03	0	1	0	100	8.02532e-17		200		38.73		20468.4	19397.5			1
70	Q03691	Protein ROT1	High	High	Not Found	Not Found	High	0	10.013	7	1	3	1	256	28.9	5.64	8.4	1	0	100	8.02532e-17		200		21.58		85464.5	193265			1
71	P36517	54S ribosomal protein L4, mitochondrial	High	High	Not Found	Not Found	Medium	0.011	2.258	6	1	2	1	319	36.9	7.65	5.75	1	0	100	8.02532e-17		200		5.88		28752.7	43988.1			1
72	P15367	Signal peptidase complex catalytic subunit SEC11	High	High	Not Found	Not Found	High	0	8.147	10	2	3	2	167	18.8	9.16	7.94	2	0	100	8.02532e-17		200		12.1		146195	288536			1
73	Q01590	Integral membrane protein SED5	High	High	Not Found	Not Found	High	0	5.276	9	2	3	2	340	38.8	6.98	7.67	2	0	100	8.02532e-17		200		1.61		29425.6	47819.4			1
74	P38770	Nucleus export protein BRL1	High	High	Not Found	Not Found	High	0.001	3.599	2	1	2	1	471	53.4	4.86	4.54	1	0	100	8.02532e-17		200		7.41		42424.5	63505.2			1
75	Q12429	Diphthine--ammonia ligase	High	High	Not Found	Not Found	High	0.01	2.326	3	1	2	1	685	77.9	5.88	2.56	1	0	100	8.02532e-17		200		1.92		20908.3	33829.5			1
76	P20434	DNA-directed RNA polymerases I, II, and III subunit RPABC1	High	High	Not Found	Not Found	High	0.001	3.704	5	1	3	1	215	25.1	9.1	6.54	1	0	100	8.02532e-17		200		8.84		50928.8	95959.2			1
77	Q08096	RNA 3'-terminal phosphate cyclase-like protein	High	High	Not Found	Not Found	High	0.001	3.454	3	1	2	1	367	40.1	8.84	4.66	1	0	100	8.02532e-17		200		9.72		41589.5	60253.8			1
78	P52593	Nucleoporin NUP188	High	High	Not Found	Not Found	Medium	0.011	2.299	1	1	2	1	1655	188.5	5.6	1.85	1	0	100	8.02532e-17		200		3.15		28252.9	44921.6			1
79	P40070	U6 snRNA-associated Sm-like protein LSm4	High	High	Not Found	Not Found	High	0.001	3.436	6	1	2	1	187	21.3	9.45	4.36	1	0	100	8.02532e-17		200		21.95		38538.6	46852.3			1
80	Q6Q560	Protein ISD11	High	High	Not Found	Not Found	Medium	0.019	2.145	10	1	2	1	94	11.3	10.33	4.46	1	0	100	8.02532e-17		200		7.45		100246	185190			1
81	P38713	Oxysterol-binding protein homolog 3	High	High	Not Found	Not Found	High	0	5.635	4	2	3	2	996	113.7	8.57	8.12	2	0	100	8.02532e-17		200		18.6		40648.7	51867.3			1
82	P53254	U3 small nucleolar RNA-associated protein 22	High	High	Not Found	Not Found	High	0	3.777	2	2	3	2	1237	140.4	8.46	5.09	2	0	100	8.02532e-17		200		21.56		53484.4	65393.9			1
83	Q06678	54S ribosomal protein L35, mitochondrial	High	High	Not Found	Not Found	High	0	4.325	7	2	2	2	367	42.8	9.51	5.07	2	0	100	8.02532e-17		200		2.67		44711.2	77195.8			1
84	P48445	Biotin--protein ligase	High	High	Not Found	Not Found	High	0.001	3.509	2	1	2	1	690	76.3	6.92	4.85	1	0	100	8.02532e-17		200				17308.4				1
85	Q12511	Pyruvate dehydrogenase (acetyl-transferring)-phosphatase 1, mitochondrial	High	High	Not Found	Not Found	High	0	5.145	6	2	3	2	572	63.6	8.62	7.31	2	0	100	8.02532e-17		200		5.24		54237.1	97115.9			1
86	P00431	Cytochrome c peroxidase, mitochondrial	High	High	Not Found	Not Found	High	0.001	3.465	10	2	2	2	361	40.3	6.38	0	2	0	100	8.02532e-17		200		38.08		7174.11	20716.4			1
87	Q05881	Uncharacterized protein YLR287C	High	High	Not Found	Not Found	High	0	5.139	4	1	2	1	355	40.9	5.07	2.56	1	0	100	8.02532e-17		200				48319.1				1
88	Q02046	Methylenetetrahydrofolate dehydrogenase	High	High	Not Found	Not Found	High	0	8.976	9	2	3	2	320	36.2	6.99	9.12	2	0	100	8.02532e-17		200		2.04		48563.2	78438.7			1
89	P39006	Phosphatidylserine decarboxylase proenzyme 1, mitochondrial	High	High	Not Found	Not Found	High	0	7.69	7	3	3	3	500	56.6	9.1	6.2	3	0	100	8.02532e-17		200		14.55		102251	138290			1
90	P40502	Altered inheritance of mitochondria protein 19, mitochondrial	High	High	Not Found	Not Found	High	0	4.612	15	1	2	1	157	16.9	9.99	7.06	1	0	100	8.02532e-17		200		30.23		76976.9	82902.4			1
91	Q12221	mRNA-binding protein PUF2	High	High	Not Found	Not Found	Medium	0.021	2.071	1	1	2	1	1075	119.4	8.78	4.81	1	0	100	8.02532e-17		200				118583				1
92	P25374	Cysteine desulfurase, mitochondrial	High	High	Not Found	Not Found	High	0	5.817	3	1	2	1	497	54.4	8.19	5.42	1	0	100	8.02532e-17		200		20.93		29741.5	66627.8			1
93	P39990	13 kDa ribonucleoprotein-associated protein	High	High	Not Found	Not Found	High	0.008	2.401	8	1	2	1	126	13.6	7.85	4.75	1	0	100	8.02532e-17		200		112.95		241064	44857.2			1
94	P38084	Leu/Val/Ile amino-acid permease	High	High	Not Found	Not Found	High	0.001	3.517	2	1	2	1	609	67.7	8.24	4.71	1	0	100	8.02532e-17		200		4.92		50238.8	89549			1
95	P26755	Replication factor A protein 3	High	High	Not Found	Not Found	High	0	4.457	12	1	2	1	122	13.8	4.79	5.42	1	0	100	8.02532e-17		200		35.45		19914	55258.6			1
96	Q02486	ARS-binding factor 2, mitochondrial	High	High	Not Found	Not Found	High	0.002	3.025	5	1	2	1	183	21.5	9.69	5.35	1	0	100	8.02532e-17		200		33.55		60058.2	161953			1
97	Q03218	Mitochondrial metal transporter 1	High	High	Not Found	Not Found	High	0	6.323	6	2	3	2	510	56.2	7.09	7.64	2	0	100	8.02532e-17		200		45.06		35327.6	113657			1
98	P32842	V-type proton ATPase subunit c'	High	High	Not Found	Not Found	High	0	5.082	11	1	2	1	164	17	7.72	6.46	1	0	100	8.02532e-17		200		57.77		97477.5	68062.7			1
99	Q3E824	Uncharacterized protein YOR020W-A	High	High	Not Found	Not Found	High	0.007	2.48	12	1	2	1	90	9.6	8.38	4.58	1	0	100	8.02532e-17		200		47.11		56041.1	46611.4			1
100	P40215	External NADH-ubiquinone oxidoreductase 1, mitochondrial	High	High	Not Found	Not Found	High	0.001	3.311	2	1	2	1	560	62.7	9.28	4.07	1	0	100	8.02532e-17		200		6.12		41939.8	63942.6			1
101	P40467	Activator of stress genes 1	High	High	Not Found	Not Found	High	0.003	2.927	2	1	2	1	964	108.7	6.16	3.77	1	0	100	8.02532e-17		200		30.32		36404.4	93563.7			1
102	Q06170	Uncharacterized membrane protein YLR326W	High	High	Not Found	Not Found	High	0.007	2.478	7	1	2	1	240	27.4	9.36	2	1	0	100	8.02532e-17		200		30.68		5083.54	13134.5			1
103	Q03161	Glucose-6-phosphate 1-epimerase	High	High	Not Found	Not Found	High	0	9.006	18	4	4	4	297	33.9	6.13	9.22	4	0	100	8.02532e-17		200		3.76		213355	336330			1
104	Q06107	Uncharacterized TLC domain-containing protein YPR114W	High	High	Not Found	Not Found	High	0	6.113	8	2	6	2	315	36.7	9.22	15.99	2	0	100	8.02532e-17		200		17.7		293393	379257			1	Acetyl [N-Term]
105	P0CH09	Ubiquitin-60S ribosomal protein L40	High	High	Not Found	Not Found	High	0	17.246	31	4	16	1	128	14.5	9.83	24.24	4	0	100	8.02532e-17		200		7.48		44789.2	66979.4			1
106	P23900	Glycerol uptake/efflux facilitator protein	High	High	Not Found	Not Found	High	0	5.529	5	2	3	2	669	73.8	6.9	2.86	2	0	100	8.02532e-17		200		52.17		38127.4	137503			1
107	Q04201	CUE domain-containing protein CUE4	High	High	Not Found	Not Found	High	0	7.885	24	1	3	1	117	12.9	7.52	10.09	1	0	100	8.02532e-17		200		66.22		331808	199786			1
108	P38063	Ribose-phosphate pyrophosphokinase 4	High	High	Not Found	Not Found	High	0	11.069	18	3	4	2	326	35.7	6.39	13.19	3	0	100	8.02532e-17		200		10.59		31903.3	45647.9			1
109	P36062	Vacuolar amino acid transporter 3	High	High	Not Found	Not Found	High	0	6.184	2	1	2	1	692	75.4	8.53	4.47	1	0	100	8.02532e-17		200		27.76		23519.3	58203			1
110	P40016	26S proteasome regulatory subunit RPN3	High	High	Not Found	Not Found	High	0	4.816	3	1	2	1	523	60.4	5.6	4.64	1	0	100	8.02532e-17		200		8.57		28861.2	42499			1
111	Q12109	Tryptophan--tRNA ligase, cytoplasmic	High	High	Not Found	Not Found	High	0	5.186	4	1	2	1	432	49.3	6.81	5.66	1	0	100	8.02532e-17		200		12.28		24248	47980.6			1
112	P38166	Protein transport protein SFT2	High	High	Not Found	Not Found	High	0	6.606	12	2	3	2	215	24.3	8.84	8.68	2	0	100	8.02532e-17		200		14.88		320392	431240			1
113	P53283	Polyamine transporter 2	High	High	Not Found	Not Found	High	0.001	3.535	4	1	2	1	614	67.5	7.01	2.91	1	0	100	8.02532e-17		200		45.12		52984.5	45472.1			1
114	P36150	Uroporphyrinogen-III C-methyltransferase	High	High	Not Found	Not Found	Medium	0.031	1.834	2	1	2	1	593	66.1	6.57	2.37	1	0	100	8.02532e-17		200		6.95		48011.3	72343.4			1
115	Q05521	Diacylglycerol pyrophosphate phosphatase 1	High	High	Not Found	Not Found	High	0.001	3.502	6	1	2	1	289	33.5	6.44	4.52	1	0	100	8.02532e-17		200		14.71		85333.8	115142			1
116	Q06705	Phosphatidylinositol transfer protein CSR1	High	High	Not Found	Not Found	Medium	0.032	1.807	2	1	2	1	408	47.4	6.62	3.67	1	0	100	8.02532e-17		200		19.64		31732.1	69776.2			1
117	P53895	Protein ASI2	High	High	Not Found	Not Found	High	0.002	3.013	5	1	2	1	289	33	9.52	4.8	1	0	100	8.02532e-17		200		15.7		34583.4	46002.7			1
118	P23724	Proteasome subunit beta type-6	High	High	Not Found	Not Found	High	0	5.426	10	2	4	2	241	26.9	6.07	9.19	2	0	100	8.02532e-17		200		5.46		106675	191593			1
119	Q06205	FK506-binding protein 4	High	High	Not Found	Not Found	Medium	0.021	2.096	3	1	2	1	392	43.9	4.69	1.93	1	0	100	8.02532e-17		200		14.93		45936	61782.1			1
120	P25626	54S ribosomal protein IMG1, mitochondrial	High	High	Not Found	Not Found	High	0	5.995	13	2	3	2	169	19.4	10.39	7.28	2	0	100	8.02532e-17		200		18.52		45927.3	99365.4			1
121	P00128	Cytochrome b-c1 complex subunit 7, mitochondrial	High	High	Not Found	Not Found	High	0	7.906	26	2	3	2	127	14.6	5.88	10.11	2	0	100	8.02532e-17		200		4.61		143680	223785			1
122	Q03713	Respiratory supercomplex factor 1, mitochondrial	High	High	Not Found	Not Found	High	0	6.396	13	2	3	2	159	18.5	9.1	6.64	2	0	100	8.02532e-17		200		10.28		121861	234373			1
123	Q07872	Epsin-4	High	High	Not Found	Not Found	High	0.001	3.092	6	1	2	1	247	28.3	9.36	5.31	1	0	100	8.02532e-17		200		37.25		46704.9	45269.1			1
124	P33401	Phosphoglucomutase 1	High	High	Not Found	Not Found	High	0	6.206	4	2	2	2	570	63.1	7.24	4.64	2	0	100	8.02532e-17		200		27.36		83956.3	206557			1
125	P32899	U3 small nucleolar ribonucleoprotein protein IMP3	High	High	Not Found	Not Found	High	0	4.479	14	2	3	2	183	21.9	9.76	6.38	2	0	100	8.02532e-17		200		7.84		170687	317070			1
126	P39994	Putative 2-hydroxyacyl-CoA lyase	High	High	Not Found	Not Found	High	0	3.802	3	1	2	1	560	61.3	7.66	5.08	1	0	100	8.02532e-17		200		14.18		43740.8	88931.7			1
127	P00424	Cytochrome c oxidase subunit 5A, mitochondrial	High	High	Not Found	Not Found	High	0	11.973	19	2	7	1	153	17.1	9.82	17.09	2	0	100	8.02532e-17		200		10.48		37085.9	71530.2			1
128	Q08023	Protein FMP25, mitochondrial	High	High	Not Found	Not Found	High	0	4.886	4	2	2	2	583	66.6	8.87	5.27	2	0	100	8.02532e-17		200		45.12		148963	479761			1
129	P53734	ATP-dependent RNA helicase DBP6	High	High	Not Found	Not Found	High	0.007	2.429	2	1	2	1	629	70.3	6.25	4.76	1	0	100	8.02532e-17		200					35437			1
130	P53751	Uncharacterized membrane glycoprotein YNR065C	High	High	Not Found	Not Found	High	0	19.104	6	5	8	2	1116	125.1	5.07	21.38	5	0	100	8.02532e-17		200		71.85		59283.7	32153.7			1
131	P32191	Glycerol-3-phosphate dehydrogenase, mitochondrial	High	High	Not Found	Not Found	High	0.001	3.576	2	1	2	1	649	72.3	7.9	4.8	1	0	100	8.02532e-17		200		39.46		85401.9	80038.3			1
132	Q03674	Lysophospholipase 2	High	High	Not Found	Not Found	High	0	6.358	3	2	4	2	706	75.4	4.7	9.94	2	0	100	8.02532e-17		200		15.46		346450	462494			1
133	P48563	Protein MON2	High	High	Not Found	Not Found	High	0	7.076	1	1	2	1	1636	186.7	5.69	3.67	1	0	100	8.02532e-17		200		17.13		28744.3	37464.2			1
134	P38998	Saccharopine dehydrogenase	High	High	Not Found	Not Found	High	0.001	3.054	3	1	2	1	373	41.4	9.1	4.59	1	0	100	8.02532e-17		200		49		52173.9	42100.7			1
135	P32501	Translation initiation factor eIF-2B subunit epsilon	High	High	Not Found	Not Found	High	0.001	3.744	2	1	2	1	712	81.1	4.81	4.15	1	0	100	8.02532e-17		200		29.63		42893.5	46604.7			1
136	Q12066	Nuclear rim protein 1	High	Not Found	Not Found	Not Found	High	0	4.195	4	1	1	1	484	56.9	9.01	3.58	1	0	100	8.02532e-17		200				25057.2				1
137	Q08920	Nuclear cap-binding protein subunit 2	High	Not Found	Not Found	Not Found	Medium	0.026	1.906	4	1	1	1	208	23.8	5.16	0	1	0	100	8.02532e-17		200				40181.9				1
138	P47140	Altered inheritance rate of mitochondria protein 25	High	Not Found	Not Found	Not Found	High	0.01	2.347	6	1	1	1	327	37.5	8.65	2.68	1	0	100	8.02532e-17		200				12935				1
139	P25037	Ubiquitin carboxyl-terminal hydrolase 1	High	Not Found	Not Found	Not Found	High	0	3.79	2	1	2	1	809	92.7	4.89	5.67	1	0	100	8.02532e-17		200				74417.2				1
140	P24279	DNA replication licensing factor MCM3	High	Not Found	Not Found	Not Found	Medium	0.024	2.002	2	1	1	1	971	107.5	5.45	0	1	0	100	8.02532e-17		200				13684.1				1
141	P53894	Serine/threonine-protein kinase CBK1	High	Not Found	Not Found	Not Found	Medium	0.035	1.738	1	1	1	1	756	86.9	7.91	1.61	1	0	100	8.02532e-17		200				46954.5				1
142	Q12207	Non-classical export protein 2	High	Not Found	Not Found	Not Found	High	0.006	2.576	5	1	1	1	173	19	9.39	2.21	1	0	100	8.02532e-17		200				140587				1
143	P38234	Protein RFS1	High	Not Found	Not Found	Not Found	High	0.001	3.229	16	1	1	1	210	22.9	5.29	4.77	1	0	100	8.02532e-17		200				47826.9				1
144	P00360	Glyceraldehyde-3-phosphate dehydrogenase 1	High	Not Found	Not Found	Not Found	High	0	33.325	30	10	33	1	332	35.7	8.28	56.99	10	0	100	8.02532e-17		200				65954.2				1
145	P32473	Pyruvate dehydrogenase E1 component subunit beta, mitochondrial	High	Not Found	Not Found	Not Found	High	0.007	2.446	3	1	1	1	366	40	5.3	2.25	1	0	100	8.02532e-17		200				47580.9				1
146	P47019	Ribosome biogenesis protein ALB1	High	Not Found	Not Found	Not Found	High	0.001	3.737	14	1	1	1	175	19.3	10.02	2.8	1	0	100	8.02532e-17		200				25237.2				1
147	P37267	Assembly factor CBP4	High	Peak Found	Not Found	High	Medium	0.031	1.836	7	1	2	1	147	17.5	9.17	1.73	1	0	100	8.02532e-17		200		9.99		108486	207782			1
148	Q03362	Uncharacterized protein YDR476C	High	Peak Found	Not Found	Not Found	High	0.001	3.689	6	1	1	1	224	25.3	6.54	2.47	1	0	100	8.02532e-17		200		29.48		39207.2	42696.5			1
149	P51401	60S ribosomal protein L9-B	High	Peak Found	Not Found	Not Found	High	0	32.197	47	7	83	1	191	21.6	9.66	214.82	7	0	100	8.02532e-17		200		93.9		79781	26787.1			1
150	P0CF36	Putative uncharacterized protein YPL276W	High	Peak Found	Not Found	Not Found	High	0.004	2.882	8	1	1	1	145	15.9	4.94	1.92	1	0	100	8.02532e-17		200		72.42		75590.3	40550.3			1
151	P25515	V-type proton ATPase subunit c	High	Peak Found	Not Found	Not Found	High	0.001	3.503	11	1	1	1	160	16.3	7.99	3.06	1	0	100	8.02532e-17		200		18.02		161996	208450			1
152	P04806	Hexokinase-1	High	Peak Found	Not Found	Not Found	High	0	5.127	6	2	2	1	485	53.7	5.45	2.47	2	0	100	8.02532e-17		200		7.22		10974.2	20208.3			1
153	P30619	Protein transport protein SEC1	High	Peak Found	Not Found	Not Found	Medium	0.038	1.713	2	1	1	1	724	83.4	7.3	2.52	1	0	100	8.02532e-17		200		49.41		29824.4	23909.4			1
154	P38330	RNA-binding protein RMD9-like, mitochondrial	High	Peak Found	Not Found	Not Found	High	0	6.36	4	2	2	2	731	83.7	7.52	4.53	2	0	100	8.02532e-17		200		44.57		55674.5	48196.7			1
155	P35206	Mannosyl phosphorylinositol ceramide synthase regulatory protein CSG2	High	Peak Found	Not Found	Not Found	High	0.003	2.921	7	1	2	1	410	45.4	7.28	4.97	1	0	100	8.02532e-17		200		58.95		57912.7	39626			1
156	Q02455	Protein MLP1	High	Peak Found	Not Found	Not Found	Medium	0.025	1.953	1	1	1	1	1875	218.3	5.2	2.18	1	0	100	8.02532e-17		200		55.09		14713.3	55679.4			1
157	P24482	DNA polymerase epsilon subunit B	High	Peak Found	Not Found	Not Found	High	0.006	2.695	1	1	1	1	689	78.3	6.19	1.96	1	0	100	8.02532e-17		200		8.93		34074.2	49919.1			1
158	P38329	Vacuolar cation-chloride cotransporter 1	High	Peak Found	Not Found	Not Found	High	0.001	3.217	1	1	1	1	1120	123.9	8.54	1.92	1	0	100	8.02532e-17		200		38.29		29973.8	28595.7			1
159	P39965	Probable proline--tRNA ligase, mitochondrial	High	Peak Found	Not Found	Not Found	Medium	0.014	2.188	3	1	1	1	576	65.8	7.42	0	1	0	100	8.02532e-17		200		6.04		6894.49	10523.8			1
160	Q99315	Transposon Ty3-G Gag-Pol polyprotein	High	Peak Found	Not Found	Not Found	Medium	0.022	2.032	1	1	1	1	1547	178.2	8.82	2.17	1	0	100	8.02532e-17		200		50.7		9175.04	7202.82			1
161	P32381	Actin-related protein 2	High	Peak Found	Not Found	Not Found	High	0.001	3.56	4	1	1	1	391	44	5.78	2.62	1	0	100	8.02532e-17		200		17.28		43540.8	56625.7			1
162	P32451	Biotin synthase, mitochondrial	High	Peak Found	Not Found	Not Found	High	0.01	2.371	4	1	1	1	375	41.9	8.5	0	1	0	100	8.02532e-17		200		3.59		27592.2	43601.8			1
163	P53946	Actin-related protein 5	High	Peak Found	Not Found	Not Found	Medium	0.035	1.76	2	1	1	1	755	87.5	5.47	2.07	1	0	100	8.02532e-17		200		27.51		23968.7	26871.7			1
164	Q06091	Pre-mRNA-splicing factor SNT309	High	Peak Found	Not Found	Not Found	Medium	0.012	2.25	5	1	3	1	175	20.7	8.51	5.95	1	0	100	8.02532e-17		200		4.69		389167	605476			1
165	P05747	60S ribosomal protein L29	High	Peak Found	Not Found	Not Found	Medium	0.019	2.13	15	1	1	1	59	6.7	11.31	1.81	1	0	100	8.02532e-17		200		22.88		67388.2	80835.9			1
166	Q03723	Dolichyl-diphosphooligosaccharide--protein glycosyltransferase subunit OST6	High	Peak Found	Not Found	Not Found	High	0.004	2.744	5	1	1	1	332	37.9	8.44	2.89	1	0	100	8.02532e-17		200		63.38		43328.9	27448.9			1
167	P25373	Glutaredoxin-1	High	Peak Found	Not Found	Not Found	Medium	0.022	2.013	14	1	1	1	110	12.4	5.06	3.16	1	0	100	8.02532e-17		200		28.91		79844.3	87680.1			1
168	P38254	Probable tubulin--tyrosine ligase PBY1	High	Peak Found	Not Found	Not Found	High	0.007	2.478	2	1	1	1	753	86.3	4.94	2.31	1	0	100	8.02532e-17		200		20.84		22611.2	50587.7			1
169	P32341	Vacuolar ATPase assembly integral membrane protein VPH2	High	Peak Found	Not Found	Not Found	High	0.001	3.081	7	1	1	1	215	25.3	9.03	2.62	1	0	100	8.02532e-17		200		58.76		35545.6	24401.7			1
170	P57744	Mitochondrial import inner membrane translocase subunit TIM8	High	Peak Found	Not Found	Not Found	High	0.004	2.769	14	1	1	1	87	9.8	5.38	2.86	1	0	100	8.02532e-17		200		3		42247.1	73278.4			1
171	P48559	GTP-binding protein YPT11	High	Peak Found	Not Found	Not Found	Medium	0.011	2.277	4	1	1	1	417	47.1	6.8	1.96	1	0	100	8.02532e-17		200		22.94		19951.5	23909.7			1
172	P17076	60S ribosomal protein L8-A	High	Peak Found	Not Found	Not Found	High	0	82.093	50	18	158	1	256	28.1	10.04	366.75	18	0	100	8.02532e-17		200		16.04		522880	1091747			1
173	P38072	Protein SCO2, mitochondrial	High	Peak Found	Not Found	Not Found	High	0.001	3.04	5	1	1	1	301	34.9	8.12	3.05	1	0	100	8.02532e-17		200		2.21		54886	94151.5			1
174	P27472	Glycogen	High	Peak Found	Not Found	Not Found	High	0	4.106	3	2	5	1	705	80	6.35	8.51	2	0	100	8.02532e-17		200		22.74		118757	142733			1
175	Q12200	NPC intracellular sterol transporter 1-related protein 1	High	Peak Found	Not Found	Not Found	High	0.001	3.116	1	1	1	1	1170	132.6	5.2	2.81	1	0	100	8.02532e-17		200		6.34		25613.5	38929.8			1
176	Q12192	Repression factor of MSEs protein 1	High	Peak Found	Not Found	Not Found	Medium	0.023	1.988	3	1	1	1	310	35.2	9.06	1.74	1	0	100	8.02532e-17		200		4.51		104258	184761			1
177	P36066	Protein MRG3-like	High	Peak Found	Not Found	Not Found	Medium	0.023	1.984	4	1	1	1	463	54.5	9.06	2.48	1	0	100	8.02532e-17		200		19.86		28338.2	35508.5			1
178	Q02724	Ubiquitin-like-specific protease 1	High	Peak Found	Not Found	Not Found	High	0	4.119	3	2	2	2	621	72.3	9.47	2	2	0	100	8.02532e-17		200		20.09		31441.1	69577.5			1
179	Q08287	60S ribosome subunit biogenesis protein NOP8	Not Found	High	High	Not Found	High	0	4.285	6	2	2	2	484	56.9	5.96	4.07	2	0	100	8.02532e-17		200					45742.1			1
180	P23250	Negative RAS protein regulator protein	Not Found	High	Not Found	Not Found	Medium	0.011	2.304	3	1	1	1	407	46.6	9.09	2.29	1	0	100	8.02532e-17		200					120302			1
181	P39718	Peroxisome assembly protein 22	Not Found	High	Not Found	Not Found	High	0	6.53	11	1	1	1	180	19.9	8.31	3.11	1	0	100	8.02532e-17		200					50499.6			1
182	P38271	Protein OPY1	Not Found	High	Not Found	Not Found	Medium	0.035	1.73	2	1	1	1	328	37.7	8.12	0	1	0	100	8.02532e-17		200					8615.44			1
183	P33303	Succinate/fumarate mitochondrial transporter	Not Found	High	Not Found	Not Found	High	0.002	3.007	5	1	1	1	322	35.3	9.76	2.87	1	0	100	8.02532e-17		200					19426.5			1
184	P28272	Dihydroorotate dehydrogenase (fumarate)	Not Found	High	Not Found	Not Found	Medium	0.019	2.141	6	1	1	1	314	34.8	6.05	2.45	1	0	100	8.02532e-17		200					20188.8			1
185	Q08773	ISWI chromatin-remodeling complex ATPase ISW2	Not Found	High	Not Found	Not Found	High	0.003	2.973	1	1	1	1	1120	130.2	6.64	2.49	1	0	100	8.02532e-17		200					42373.5			1
186	P35169	Serine/threonine-protein kinase TOR1	Not Found	High	Not Found	Not Found	Medium	0.011	2.28	1	1	1	1	2470	281	7.23	2.93	1	0	100	8.02532e-17		200					10659.2			1
187	P53178	UDP-N-acetylglucosamine transferase subunit ALG13	Not Found	High	Not Found	Not Found	Medium	0.019	2.13	8	1	1	1	202	22.6	5.86	2.21	1	0	100	8.02532e-17		200					84278.8			1
188	P00724	Invertase 2	Peak Found	High	High	Not Found	High	0.004	2.839	2	1	2	1	532	60.6	4.75	1.71	1	0	100	8.02532e-17		200		39.94		23901.6	71019.2			1
189	P39081	Protein PCF11	Peak Found	High	Not Found	Not Found	Medium	0.032	1.789	2	1	1	1	626	71.9	7.83	0	1	0	100	8.02532e-17		200		0.58		28311.5	46685.8			1
190	P17119	Kinesin-like protein KAR3	Peak Found	High	Not Found	Not Found	High	0.006	2.614	1	1	1	1	729	84	8.75	2.81	1	0	100	8.02532e-17		200		23.29		43944.8	52401.8			1
191	P53256	Exosome complex component RRP46	Peak Found	High	Not Found	Not Found	Medium	0.038	1.714	4	1	1	1	223	24.4	4.86	1.89	1	0	100	8.02532e-17		200		34.78		26030.8	71501.9			1
192	P53173	ER-derived vesicles protein ERV14	Peak Found	High	Not Found	Not Found	High	0.001	3.167	8	1	1	1	138	15.9	6.92	1.94	1	0	100	8.02532e-17		200		47.82		106726	358719			1
193	P53947	Vacuolar membrane protein YNL058C	Peak Found	High	Not Found	Not Found	High	0.007	2.478	5	1	1	1	316	35	7.21	2.99	1	0	100	8.02532e-17		200		74.09		10407.5	55385.9			1
194	P53324	Steryl acetyl hydrolase 1	Peak Found	High	Not Found	Not Found	High	0.01	2.356	4	1	1	1	424	48.5	7.49	0	1	0	100	8.02532e-17		200		55.27		20802.2	15148.8			1
195	P28737	Outer mitochondrial transmembrane helix translocase	Peak Found	High	Not Found	Not Found	High	0.004	2.887	3	1	2	1	362	40.3	5.72	4.5	1	0	100	8.02532e-17		200		11.57		68053.2	133306			1
196	P38920	DNA mismatch repair protein MLH1	Peak Found	High	Not Found	Not Found	High	0.01	2.356	2	1	1	1	769	87	6.96	2.12	1	0	100	8.02532e-17		200		33.64		50333.6	51517.3			1
197	P53388	Dicarboxylic amino acid permease	Peak Found	High	Not Found	Not Found	High	0.001	3.7	2	1	1	1	608	68.1	8.91	2.84	1	0	100	8.02532e-17		200		2.72		29613.2	47375.7			1
198	Q6Q547	H/ACA ribonucleoprotein complex subunit NOP10	Peak Found	High	Not Found	Not Found	High	0.001	3.604	17	1	1	1	58	6.6	10.17	2.66	1	0	100	8.02532e-17		200		46.45		40820.5	34307.6			1
199	Q03976	37S ribosomal protein S24, mitochondrial	Peak Found	High	Not Found	Not Found	High	0.001	3.221	5	1	1	1	319	37.4	9.23	1.81	1	0	100	8.02532e-17		200		37.39		8408.12	24027.2			1
200	P05373	Delta-aminolevulinic acid dehydratase	Peak Found	High	Not Found	Not Found	Medium	0.014	2.207	4	1	1	1	342	37.7	6.14	2.17	1	0	100	8.02532e-17		200		9.83		8806.62	16827.9			1
201	P32491	MAP kinase kinase MKK2/SSP33	Peak Found	High	Not Found	Not Found	High	0.007	2.42	2	1	1	1	506	56.7	8.68	2.41	1	0	100	8.02532e-17		200		17.85		17431.6	37355.2			1
202	P32769	Elongation factor 1 alpha-like protein	Peak Found	High	Not Found	Not Found	High	0.01	2.328	1	1	1	1	611	68.7	5.36	1.93	1	0	100	8.02532e-17		200		59.21		5611.9	22770.2			1
203	P41735	5-demethoxyubiquinone hydroxylase, mitochondrial	Peak Found	High	Not Found	Not Found	High	0.007	2.43	4	1	1	1	233	26	7.99	2.7	1	0	100	8.02532e-17		200		6.75		37905.6	57277.4			1
204	P08004	Chitin synthase 1	Peak Found	High	Not Found	Not Found	High	0.004	2.809	1	1	1	1	1131	129.8	6.23	2.31	1	0	100	8.02532e-17		200		21.9		19525.1	44358.5			1
205	Q03649	Monoacylglycerol lipase	Peak Found	High	Not Found	Not Found	High	0	4.981	5	1	1	1	449	51.4	8.4	3.67	1	0	100	8.02532e-17		200		7.5		13486.1	24931.7			1
206	P36036	RNA annealing protein YRA2	Peak Found	High	Not Found	Not Found	High	0.007	2.462	5	1	1	1	203	23.8	9.39	2.12	1	0	100	8.02532e-17		200		34.78		115764	116480			1
207	P21306	ATP synthase subunit epsilon, mitochondrial	Peak Found	High	Not Found	Not Found	High	0	4.632	35	2	2	2	62	6.7	9.77	3.88	2	0	100	8.02532e-17		200		15.17		54086.1	111526			1
208	P38821	Aspartyl aminopeptidase 4	Peak Found	High	Not Found	Not Found	Medium	0.021	2.076	3	1	1	1	490	54.1	7.02	2.69	1	0	100	8.02532e-17		200		29.66		17012.8	43295			1
209	P20967	2-oxoglutarate dehydrogenase, mitochondrial	Peak Found	High	Not Found	Not Found	Medium	0.032	1.798	1	1	1	1	1014	114.3	7.21	2.2	1	0	100	8.02532e-17		200		48.38		20150.2	68341.4			1
210	P32349	DNA-directed RNA polymerase III subunit RPC3	Peak Found	High	Not Found	Not Found	Medium	0.032	1.801	2	1	1	1	654	74	6.67	0	1	0	100	8.02532e-17		200		33.14		9823.2	26326.7			1
211	Q04049	DNA polymerase eta	Peak Found	High	Not Found	Not Found	Medium	0.029	1.869	1	1	1	1	632	71.5	8.25	0	1	0	100	8.02532e-17		200		25.52		29272	70093.1			1
212	Q00873	Holocytochrome-c1 synthase	Peak Found	High	Not Found	Not Found	High	0	5.559	9	2	2	2	224	26.1	7.09	4.68	2	0	100	8.02532e-17		200		15.21		132271	272904			1
213	Q06247	Putative uncharacterized protein YLR173W	Peak Found	High	Not Found	Not Found	High	0.004	2.903	2	1	1	1	608	69.6	5.01	2.71	1	0	100	8.02532e-17		200		6.81		31265.1	57238.8			1
214	P39722	Mitochondrial Rho GTPase 1	Peak Found	High	Not Found	Not Found	Medium	0.014	2.217	2	1	1	1	662	75.1	5.99	2.02	1	0	100	8.02532e-17		200		1.97		11879.6	19206.8			1
215	P32855	Exocyst complex component SEC8	Peak Found	High	Not Found	Not Found	High	0	4.537	3	2	2	2	1065	122.1	6.74	4.43	2	0	100	8.02532e-17		200		31.92		74254.6	77984.9			1
216	Q06839	PX domain-containing protein YPR097W	Peak Found	High	Not Found	Not Found	Medium	0.026	1.925	1	1	1	1	1073	123	5.78	2.04	1	0	100	8.02532e-17		200		2.89		44020.9	76242.1			1
217	P46963	CTD kinase subunit gamma	Peak Found	High	Not Found	Not Found	Medium	0.019	2.137	3	1	1	1	296	34.8	6.33	0	1	0	100	8.02532e-17		200		10.85		7667.39	10931.5			1
218	Q12091	Damage response protein 1	Peak Found	High	Not Found	Not Found	High	0.006	2.555	5	1	1	1	152	16.7	4.86	0	1	0	100	8.02532e-17		200		21.98		7121.45	16197.3			1
219	Q07950	Sterol esterase 2	Peak Found	High	Not Found	Not Found	Medium	0.023	1.979	3	1	1	1	538	62.4	8.41	2.38	1	0	100	8.02532e-17		200		17.14		16257.6	34483.9			1
220	P47037	Structural maintenance of chromosomes protein 3	Peak Found	High	Not Found	Not Found	High	0.002	2.998	1	1	1	1	1230	141.3	5.81	2.1	1	0	100	8.02532e-17		200		8.02		160735	238534			1
221	P53172	Protein SDS23	Peak Found	High	Not Found	Not Found	High	0	5.102	6	1	1	1	527	58.1	9.04	2.75	1	0	100	8.02532e-17		200		74.94		34039.9	17387.9			1
222	Q12272	tRNA 2'-phosphotransferase	Peak Found	High	Not Found	Not Found	Medium	0.039	1.709	3	1	1	1	230	26.2	9.23	1.94	1	0	100	8.02532e-17		200		3.4		45678.1	79687.8			1
223	P39955	Protein SAP1	Peak Found	High	Not Found	Not Found	High	0	6.148	4	2	2	2	897	100.3	8.97	5.15	2	0	100	8.02532e-17		200		96.52		5864.16	51670.2			1
224	Q06116	Uncharacterized protein YPR117W	Peak Found	High	Not Found	Not Found	Medium	0.034	1.768	0	1	1	1	2489	285.7	8.31	2.07	1	0	100	8.02532e-17		200		38.87		167307	158213			1
225	Q08689	N-alpha-acetyltransferase NAT5	Peak Found	High	Not Found	Not Found	High	0	4.169	8	1	1	1	176	19.7	7.91	3.51	1	0	100	8.02532e-17		200		14.89		200520	269843			1
226	P54003	Protein SUR7	Peak Found	High	Not Found	Not Found	High	0.007	2.458	12	1	1	1	302	33.8	7.47	3.69	1	0	100	8.02532e-17		200		80.55		10496.9	63631.9			1
227	P33760	Peroxisomal ATPase PEX6	Peak Found	High	Not Found	Not Found	Medium	0.021	2.085	1	1	1	1	1030	115.5	5.68	2.06	1	0	100	8.02532e-17		200		1.33		22018.4	37301.4			1
228	P40581	Glutathione peroxidase-like peroxiredoxin HYR1	Peak Found	High	Not Found	Not Found	Medium	0.031	1.811	12	1	1	1	163	18.6	8.19	2.08	1	0	100	8.02532e-17		200		41.13		26629.3	24322.2			1
229	P32477	Glutamate--cysteine ligase	Peak Found	High	Not Found	Not Found	Medium	0.014	2.207	2	1	1	1	678	78.2	6.28	2.1	1	0	100	8.02532e-17		200		27.52		18218.6	44922.5			1
230	P40508	PUP1 protein homolog	Peak Found	High	Not Found	Not Found	Medium	0.024	1.973	7	1	1	1	320	36.9	8.94	2.32	1	0	100	8.02532e-17		200		31.78		13533.1	35543.9			1
231	P25360	Inorganic phosphate transporter PHO87	Peak Found	High	Not Found	Not Found	High	0	3.845	1	1	1	1	923	102.5	6.32	2.22	1	0	100	8.02532e-17		200		6.07		48870.6	74565			1
232	Q99252	Protein ECM3	Peak Found	High	Not Found	Not Found	High	0.006	2.663	3	1	1	1	613	68	8.18	3.08	1	0	100	8.02532e-17		200		12.09		24181.3	33871.4			1
233	P16451	Pyruvate dehydrogenase complex protein X component, mitochondrial	Peak Found	High	Not Found	Not Found	High	0	3.79	4	1	1	1	410	45.3	5.73	0	1	0	100	8.02532e-17		200		12.02		10980.8	21648.3			1
234	P13382	DNA polymerase alpha catalytic subunit A	Peak Found	High	Not Found	Not Found	High	0.004	2.885	1	1	1	1	1468	166.7	6.24	2.11	1	0	100	8.02532e-17		200		15.86		76427.3	101440			1
235	Q06685	Inositol hexakisphosphate and diphosphoinositol-pentakisphosphate kinase	Peak Found	High	Not Found	Not Found	Medium	0.032	1.808	1	1	1	1	1146	129.7	8.65	1.86	1	0	100	8.02532e-17		200		50.68		8716.13	30676.4			1
236	P40151	DNA-dependent ATPase MGS1	Peak Found	High	Not Found	Not Found	Medium	0.035	1.757	3	1	1	1	587	66.5	8.37	0	1	0	100	8.02532e-17		200		67.35		3894.07	18248.5			1
237	P38041	Protein BOB1	Peak Found	High	Not Found	Not Found	High	0.001	3.701	2	2	2	2	980	109.2	9.1	2.02	2	0	100	8.02532e-17		200		53.46		13974	51473.9			1
238	P53849	Zinc finger protein GIS2	Peak Found	High	Not Found	Not Found	High	0.001	3.354	8	1	1	1	153	17.1	7.84	2.69	1	0	100	8.02532e-17		200		30.01		14713.5	37639.5			1
239	P38715	NADPH-dependent aldose reductase GRE3	Peak Found	High	Not Found	Not Found	Medium	0.034	1.77	4	1	1	1	327	37.1	7.08	2.12	1	0	100	8.02532e-17		200		3.51		53682.1	84923.1			1
240	P36533	54S ribosomal protein L39, mitochondrial	Peak Found	High	Not Found	Not Found	High	0.01	2.374	16	1	1	1	70	8	10.77	1.96	1	0	100	8.02532e-17		200		30.12		19316.6	49497.6			1
241	P27636	Cell division control protein 15	Peak Found	High	Not Found	Not Found	High	0.006	2.571	1	1	1	1	974	110.2	7.9	1.72	1	0	100	8.02532e-17		200		24.99		92566.7	107679			1
242	Q06508	Lysophosphatidic acid:oleoyl-CoA acyltransferase 1	Peak Found	High	Not Found	Not Found	High	0	5.369	8	2	2	2	300	33.8	9.7	4.4	2	0	100	8.02532e-17		200		94.3		8553.83	71135.6			1
243	P16661	Chitobiosyldiphosphodolichol beta-mannosyltransferase	Peak Found	High	Not Found	Not Found	Medium	0.029	1.861	5	1	1	1	449	51.9	8.79	0	1	0	100	8.02532e-17		200		56.63		20858.9	14846.2			1
244	Q05123	Actin-like protein ARP9	Peak Found	High	Not Found	Not Found	High	0.006	2.542	3	1	1	1	467	53	5.15	2.05	1	0	100	8.02532e-17		200		10.12		17950.7	25858.6			1
245	Q12458	Putative reductase 1	Peak Found	High	Not Found	Not Found	Medium	0.032	1.787	3	1	1	1	312	34.7	7.12	0	1	0	100	8.02532e-17		200		48.86		15042	12164			1
246	P40102	Uncharacterized protein YER187W	Peak Found	High	Not Found	Not Found	Medium	0.033	1.777	6	1	1	1	141	15.4	4.26	1.7	1	0	100	8.02532e-17		200		42.9		25642.9	22786			1
247	Q08986	S-adenosylmethionine permease SAM3	Peak Found	High	Not Found	Not Found	High	0	4.258	4	1	1	1	587	64.3	7.81	2.04	1	0	100	8.02532e-17		200		6.07		46218.1	70509.6			1
248	P38873	Target of rapamycin complex 1 subunit KOG1	Peak Found	High	Not Found	Not Found	Medium	0.019	2.129	1	1	1	1	1557	177.5	7.83	1.62	1	0	100	8.02532e-17		200		21.75		7573.84	17169.3			1
249	P53954	GDP-Man:Man(3)GlcNAc(2)-PP-Dol alpha-1,2-mannosyltransferase	Peak Found	High	Not Found	Not Found	High	0.003	2.954	2	1	1	1	548	63.1	8.98	2.51	1	0	100	8.02532e-17		200		59.32		22342.5	90827.2			1
250	P37299	Cytochrome b-c1 complex subunit 10, mitochondrial	Peak Found	High	Not Found	Not Found	Medium	0.027	1.9	26	1	1	1	77	8.6	8.53	2.46	1	0	100	8.02532e-17		200		1.91		26587.2	45412.4			1
252	P41056	60S ribosomal protein L33-B	High	High	High	Peak Found	High	0	32.748	46	6	36	2	107	12.2	11.08	91.64	6	0	84.573	2.57301e-13	135.69	195.3	4.7	10.99	122.15	1.73169e+06	2.46377e+06	134269	5336.75	1
251	P51402	60S ribosomal protein L37-B	High	High	Peak Found	Not Found	High	0	9.493	25	3	4	3	88	9.9	11.8	7.9	3	0	87.649	5.53256e-10	64.8	198	2	49.2		271002	217990	1801.46		1
255	Q04226	Transcription initiation factor TFIID subunit 11	High	Peak Found	Not Found	Peak Found	High	0.006	2.586	2	1	1	1	346	40.6	5.68	2.42	1	0	36.24	1.19302e-09	25.6	194.6	5.4	24.07		624531	736311		7386.49	1
1725	P53978	Elongation factor 3B	Peak Found	High	High	High	High	0	21.889	7	6	34	1	1044	115.8	6.23	80.71	6	0	0.063	3.02198e-08	88.98	11.8	188.2	92.33	49.05	57407.9	454415	1.29976e+06	1.45704e+06	1
1703	P32564	Protein SCM4	High	High	High	High	High	0	6.816	13	3	4	3	187	20.1	8.53	6.91	3	0	0.066	6.91326e-08	82.88	35	165	8.28	40.97	102579	191752	355808	351207	1
269	P23337	Glycogen	High	High	High	Peak Found	High	0	20.012	11	6	13	5	708	80.5	6.02	35.42	6	1	28.789	1.96393e-07	64.61	188.2	11.8	8	117.69	823732	1222801	150705	7503.1	1
278	Q04013	Citrate/oxoglutarate carrier protein	High	High	High	High	High	0	21.623	25	6	22	6	314	34.2	9.88	39.22	6	0	24.455	1.07858e-06	60.05	185.7	14.3	9.51	79.46	1.93131e+06	2.80606e+06	245961	37509.3	1
1649	P35178	Ribosomal RNA-processing protein 1	High	High	High	High	High	0	10.338	15	4	8	4	278	33.2	5.29	14.94	4	0	0.11	2.86947e-06	84.86	64.2	135.8	30.88	7.06	192616	499144	500807	246367	1
1716	Q06689	Cell membrane protein YLR413W	High	High	High	High	High	0	15.122	5	3	11	3	675	72.7	5.14	21.49	3	0	0.098	3.08691e-06	52.33	23.5	176.5	41.38	2.56	261545	794524	2.52855e+06	1.32563e+06	1
1719	P40106	Glycerol-1-phosphate phosphohydrolase 2	Peak Found	High	Peak Found	Peak Found	High	0	21.221	20	5	25	1	250	27.8	6.16	59.06	5	0	0.105	6.05049e-06	40.31	18.9	181.1	38.47	47.83	146137	424502	1.21605e+06	1.3367e+06	1
1576	P53549	26S proteasome subunit RPT4	Peak Found	High	High	High	High	0	12.151	9	5	11	4	437	49.4	5.73	17.92	5	0	0.104	6.98217e-06	102.66	81	119	39.64	32.99	292323	273178	237511	207681	1
256	P53045	C-4 methylsterol oxidase ERG25	High	High	Not Found	Peak Found	High	0	8.015	9	2	8	2	309	36.5	8.1	20.07	2	0	23.405	7.29835e-06	4.42	194.5	5.5	8.64		285098	535632		4383.86	1
1714	P00127	Cytochrome b-c1 complex subunit 6, mitochondrial	Peak Found	High	High	High	High	0	6.71	10	1	5	1	147	17.2	4.09	12.37	1	0	0.136	2.24534e-05	54.72	24	176	65.34	46.9	71669	323835	574616	622386	1
265	P38869	Protein SVP26	High	High	Peak Found	Not Found	High	0	4.391	9	2	3	2	228	26.3	8.4	3.95	2	0	19.158	2.54898e-05	8.67	190.5	9.5	14.45		273850	558883	14188.6		1
1722	P40319	Elongation of fatty acids protein 3	Peak Found	Peak Found	Peak Found	High	High	0.001	3.19	3	1	1	1	345	39.4	9.31	1.86	1	0	0.096	3.18201e-05	85.36	17.4	182.6	85.15	37.28	22706.4	152013	340774	317871	1
1727	Q03104	Meiotic sister chromatid recombination protein 1	Peak Found	Not Found	High	Peak Found	High	0.007	2.416	2	1	1	1	513	59.6	7.58	1.93	1	0	0.061	3.65829e-05	49.22	11.5	188.5		44.56	5721.2		63144.4	65910.7	1
1726	P15992	Heat shock protein 26	Peak Found	High	High	Not Found	High	0	6.894	7	1	2	1	214	23.9	5.53	6.15	1	0	0.063	3.76739e-05	206.25	11.8	188.2	114.83		3306.22	52975	153633		1
999	P41805	60S ribosomal protein L10	High	High	High	High	High	0	40.769	46	11	39	11	221	25.3	10.02	88.89	11	0	16.366	4.66611e-05	145.12	125.9	74.1	41.82	61.71	1.34422e+07	1.21473e+07	3.41948e+06	4.737e+06	1
267	P53335	Protein PXR1	High	High	Peak Found	High	High	0	12.335	17	4	8	4	271	31.3	9.88	15.25	4	0	19.555	5.95322e-05	142.53	190.1	9.9	18.36	126.93	294449	377048	2926.36	29467.9	1
1723	P32623	Probable glycosidase CRH2	Peak Found	Peak Found	Peak Found	High	Medium	0.029	1.851	2	1	1	1	467	49.9	4.78	0	1	0	0.076	0.000122083	39.48	14.1	185.9	43.63	27.53	15325.5	48215.4	212998	171781	1
311	P40030	Ergosterol biosynthetic protein 28	High	High	High	Peak Found	High	0	13.657	16	2	10	2	148	17.1	9.38	25.43	2	0	13.696	0.000210728	49.61	177	23	8.54	98.86	1.28521e+06	1.89322e+06	349340	33640.9	1
1724	P00729	Carboxypeptidase Y	Not Found	Peak Found	High	Not Found	High	0.01	2.353	2	1	1	1	532	59.8	4.73	1.83	1	0	0.076	0.000222665	0	14.1	185.9				6153.53	45562.5		1
253	P36046	Mitochondrial intermembrane space import and assembly protein 40	High	High	Peak Found	Not Found	High	0	9.942	8	3	6	3	403	44.5	4.56	15.66	3	0	16.573	0.000251504	18.38	195	5	13.91		321852	439282	7032.1		1
286	Q06410	Autophagy-related protein 17	High	Peak Found	Peak Found	Peak Found	High	0.007	2.416	2	1	1	1	417	48.6	5.1	1.67	1	0	11.527	0.000254921	69.29	184	16	6.97	62.32	604825	911140	29136.7	40801.3	1
262	P32505	Nuclear polyadenylated RNA-binding protein NAB2	High	High	Peak Found	Not Found	High	0	4.657	4	1	3	1	525	58.3	8.12	8.87	1	0	22.408	0.000271449	24.51	191.5	8.5	23.07		130877	302410	6446.87		1
257	P33296	Ubiquitin-conjugating enzyme E2 6	High	High	Peak Found	Peak Found	High	0	17.001	25	4	9	4	250	28.4	6.16	24.48	4	0	11.801	0.000348117	42.6	193.9	6.1	9.33	44.12	412607	782858	9329.74	9671.52	1
1681	P53633	Prenylated Rab acceptor 1	High	High	High	Peak Found	High	0	7.342	13	2	3	2	176	19.4	8.41	4	2	0	0.091	0.000377036	52.62	47.9	152.1	12.17	52.26	69900.4	97796.7	129367	152784	1
264	P36051	GPI ethanolamine phosphate transferase 1	High	High	Peak Found	Not Found	High	0	6.386	3	2	6	2	919	105.6	6.71	14.35	2	0	12.655	0.000400983	4.65	191.1	8.9	2.61		330626	570360	14645.7		1
258	P39744	Nucleolar complex protein 2	High	High	Peak Found	High	High	0	15.819	7	5	8	5	710	81.6	8.48	14.64	5	0	11.119	0.000450501	130.14	193.7	6.3	18.11	134.39	391755	842566	2172.31	46314	1
288	P38079	Protein YRO2	High	High	High	Peak Found	High	0	15.671	10	2	20	1	344	38.7	9.19	62.55	2	0	10.398	0.000512093	321.64	182.5	17.5	13.43	130.43	600400	825097	244447	5372.56	1
1537	P87108	Mitochondrial import inner membrane translocase subunit TIM10	High	High	High	High	High	0	8.384	23	2	5	2	93	10.3	5.36	14.95	2	0	0.127	0.000718237	21.87	87.9	112.1	4.22	20.63	124889	220390	132515	96652.7	1
1721	P33448	Mitochondrial import receptor subunit TOM6	Peak Found	Not Found	High	Peak Found	High	0.007	2.464	34	1	1	1	61	6.4	6.44	2.13	1	0	0.098	0.000787226	65.12	17.9	182.1		56.87	10206.6		148615	34449.6	1
1717	Q12160	Uncharacterized protein YPR063C	Not Found	Peak Found	High	High	High	0.001	3.402	9	1	2	1	140	15.4	7.08	5.51	1	0	0.119	0.0016543	31.98	21.3	178.7		29.82		12936.1	49239.7	41075.2	1
1598	Q08245	Protein ZEO1	High	High	High	High	High	0	12.574	34	3	8	3	113	12.6	5.43	20.34	3	0	0.208	0.00178899	72.64	77	123	11.77	27.92	418861	589385	472042	382845	1
300	P38988	Mitochondrial GTP/GDP carrier protein 1	High	High	High	Peak Found	High	0	22.651	24	7	26	7	300	33.2	10.02	47.47	7	0	9.916	0.00239018	64.43	179.7	20.3	5.41	26.09	3.08075e+06	5.52953e+06	407296	152440	1
1718	P53141	Myosin light chain 1	Peak Found	High	High	Peak Found	High	0	6.925	19	2	2	2	149	16.4	4.73	6.38	2	0	0.115	0.00247365	31.47	20.7	179.3	26.52	35.16	4878.19	11854.7	37165.9	33573.4	1
1708	P47001	Cell wall mannoprotein CIS3	Peak Found	Peak Found	High	High	High	0	4.724	8	2	2	2	227	23.2	4.68	3.92	2	0	0.207	0.00265767	29.67	32.2	167.8	14.85	28.66	97355.3	131097	347846	285232	1
445	P26785	60S ribosomal protein L16-B	High	High	High	High	High	0	32.319	31	9	108	5	198	22.2	10.55	229.02	9	0	9.701	0.00276422	110.47	160.2	39.8	8.58	11.19	7.79889e+06	1.14824e+07	1.85028e+06	858361	1
1644	P07267	Saccharopepsin	High	High	High	High	High	0	12.07	18	5	9	5	405	44.5	4.84	17.76	5	0	0.159	0.00277758	26.32	65	135	5.03	27.54	108196	167533	247442	90667.1	1
263	P47045	Mitochondrial import inner membrane translocase subunit TIM54	High	High	Peak Found	Not Found	High	0	4.809	5	2	4	2	478	54.1	5.78	8.78	2	0	15.993	0.00282146	19.71	191.5	8.5	4.99		116993	208744	5040.62		1
280	P40073	High osmolarity signaling protein SHO1	High	High	Peak Found	Peak Found	High	0	8.32	4	1	3	1	367	41.1	5.69	6.12	1	0	12.754	0.0032045	57.55	185.5	14.5	14.03	55.73	198999	403701	10638.9	13306.4	1
283	Q3E7X9	40S ribosomal protein S28-A	High	High	Not Found	Peak Found	High	0	14.167	48	3	18	1	67	7.6	10.78	36.77	3	0	11.941	0.00333879	84.01	184.5	15.5	69.72		398846	225189		9907.32	1	Acetyl [N-Term]
259	P38630	Replication factor C subunit 1	Peak Found	High	Peak Found	Not Found	High	0	7.305	2	2	2	2	861	94.8	9.22	3.87	2	0	14.7	0.0037467	6.28	193.2	6.8	0.65		89390	147261	2949.48		1
272	P22276	DNA-directed RNA polymerase III subunit RPC2	High	High	Peak Found	Not Found	High	0.004	2.883	2	1	2	1	1149	129.4	8.18	4.6	1	0	14.852	0.0037467	22.97	187.4	12.6	21.65		81946.5	100060	4427.23		1
266	P38137	Oxalate--CoA ligase	High	High	Peak Found	Not Found	High	0	5.585	4	2	2	2	543	60.5	9.2	4.52	2	0	14.731	0.00393297	10.51	190.5	9.5	13.73		89808.9	122878	3802.62		1
361	Q02326	60S ribosomal protein L6-A	High	High	High	High	High	0	43.17	47	9	89	4	176	19.9	10.1	199.63	9	0	8.896	0.0048354	129.32	168.6	31.4	6.53	21.88	1.83323e+07	2.77866e+07	2.60826e+06	1.93693e+06	1
370	P50108	Probable alpha-1,6-mannosyltransferase MNN10	High	High	High	High	High	0	13.293	13	5	11	5	393	46.7	6.89	9.83	5	0	8.873	0.00490436	119.64	167.8	32.2	18.35	16.89	959772	1.22912e+06	170404	72870.9	1
354	Q3E792	40S ribosomal protein S25-A	High	High	Peak Found	Peak Found	High	0	24.59	39	5	26	5	108	12	10.32	84.75	5	0	8.665	0.00571817	182.53	169.4	30.6	51.72	66.87	1.85038e+07	1.42878e+07	1.27363e+06	1.93454e+06	1
375	Q00245	GTP-binding protein RHO3	High	High	High	High	High	0	16.879	25	5	14	5	231	25.3	5	29.84	5	0	8.43	0.00585739	75.75	167	33	20.91	39.94	715118	882565	85373.6	82938.5	1
1706	P40513	Mitochondrial acidic protein MAM33	High	Not Found	Peak Found	Not Found	Medium	0.039	1.703	4	1	1	1	266	30.1	4.58	1.83	1	0	0.196	0.0059533	0	32.8	167.2			65243.3		311878		1
1715	Q07468	Vacuolar morphogenesis protein 6	High	Peak Found	Peak Found	Peak Found	Medium	0.023	2.022	1	1	1	1	1049	122.8	7.05	0	1	0	0.134	0.00600346	78.7	23.7	176.3	85.59	48.72	2674.17	1093.53	6456.73	7199.53	1
276	P38068	Monothiol glutaredoxin-7	Peak Found	High	Not Found	Peak Found	Medium	0.035	1.751	4	1	1	1	203	22.6	6	1.94	1	0	13.333	0.00611728	10.75	186	14	10.22		115036	221061		4721.32	1
1712	Q12404	Protein disulfide-isomerase MPD1	Peak Found	Peak Found	High	High	Medium	0.029	1.88	3	1	2	1	318	36.4	9.6	2.06	1	0	0.155	0.00775121	65.94	26.8	173.2	68.9	31.51	6487.75	31279.2	53366.8	45643.4	1
281	Q07623	Nucleolar protein 6	High	Peak Found	Peak Found	Not Found	High	0.006	2.62	11	1	1	1	225	25.2	10.08	0	1	0	12.376	0.00870792	8.12	185	15	7.73		35558.1	65955.8	2841.29		1
1684	P36017	Vacuolar protein sorting-associated protein 21	Not Found	High	High	Peak Found	High	0	10.424	17	3	6	2	210	23.1	5.33	14.64	3	0	0.272	0.00944561	94.02	46.9	153.1		104.9		240105	1.14681e+06	92422.8	1
1587	P36120	ATP-dependent RNA helicase DBP7	High	High	High	High	High	0	6.917	4	2	4	2	742	83.3	9.28	6.39	2	0	0.144	0.00948785	97.67	78.9	121.1	20.65	17.44	36368.1	81143	53454.1	37232.4	1
1679	P24000	60S ribosomal protein L24-B	High	High	Peak Found	Peak Found	High	0	13.011	17	3	10	2	155	17.5	11.37	22.51	3	0	0.27	0.0097009	60.4	48.6	151.4	1.07	54.44	521463	880173	1.02139e+06	1.25024e+06	1
1699	P43620	Sporulation protein RMD8	High	High	Peak Found	Peak Found	Medium	0.011	2.263	2	1	2	1	662	75.9	7.28	2.54	1	0	0.218	0.00977004	15.48	35.9	164.1		14.68		118890	276142	184903	1
1215	P43600	Secreted protein CSS2	High	Peak Found	High	Not Found	High	0	4.114	10	2	2	2	232	25.7	4.65	0	2	0	0.159	0.0103579	15.41	113.6	86.4	28.4		36362.8	90836.5	31763.6		1
289	P53008	Mannosyl-oligosaccharide glucosidase	High	Peak Found	Peak Found	Not Found	Medium	0.011	2.268	1	1	1	1	833	96.4	5.07	1.93	1	0	10.447	0.0117793	12.76	182.5	17.5	12.13		39457.9	77907.9	3853.81		1
705	P39727	ER-derived vesicles protein ERV46	High	High	Peak Found	High	High	0	21.738	18	4	15	4	415	46.2	6.83	38.71	4	0	7.652	0.0122581	109.91	141.5	58.5	37.54	61.9	1.16843e+06	1.12764e+06	215631	299736	1
261	Q12451	Oxysterol-binding protein homolog 2	High	High	Peak Found	Not Found	High	0	5.945	2	2	4	2	1283	145.7	6.83	4.83	2	0	10.449	0.0124525	12.32	191.6	8.4	22.41		71326.5	86145.8	2494.48		1
1709	P39005	Cell wall synthesis protein KRE9	Peak Found	High	High	High	High	0	3.852	4	1	4	1	276	30	9.2	9.28	1	0	0.17	0.0133625	40.74	29.1	170.9	15.68	41.53	33082.5	68719.9	150375	149715	1
1615	P34253	Protein KTI12	High	High	High	High	High	0	5.553	6	2	5	2	313	35.3	7.99	7.87	2	0	0.17	0.0136138	108.95	72.4	127.6	8.61	24.14	86422.7	127182	112916	86648.8	1
287	P33204	Actin-related protein 2/3 complex subunit 4	High	High	Peak Found	Not Found	High	0	5.17	9	1	2	1	171	19.9	5.4	6.67	1	0	11.061	0.014606	21.17	183.4	16.6	19.99		92773.9	116039	6811.48		1
1406	P48589	40S ribosomal protein S12	High	High	High	High	High	0	19.644	33	5	18	5	143	15.5	4.73	46.97	5	0	0.293	0.0157341	149.79	100.9	99.1	22.2	39.2	1.69965e+06	3.87833e+06	1.37715e+06	1.32286e+06	1
1710	P40047	Aldehyde dehydrogenase 5, mitochondrial	Peak Found	High	Peak Found	Peak Found	High	0	5.395	3	2	2	1	520	56.7	8.15	1.8	2	0	0.164	0.0157938	74.03	28.2	171.8	76.04	33.93	13928.7	77021.3	113390	100555	1
1310	P33775	Dolichyl-phosphate-mannose--protein mannosyltransferase 1	High	High	High	High	High	0	39.828	12	8	24	8	817	92.6	6.68	58.4	8	0	0.295	0.0164362	45.19	108.4	91.6	21.94	42.64	1.54172e+06	1.87469e+06	763955	773870	1
1077	Q00772	Mitogen-activated protein kinase SLT2/MPK1	Peak Found	Not Found	High	Not Found	High	0.001	3.622	3	2	2	1	484	55.6	5.34	1.78	2	1	0.171	0.0190009	0	122.4	77.6	3.89		55591.2	87469.6	32120.9		1
658	P11792	Serine/threonine-protein kinase SCH9	High	High	High	Peak Found	High	0	13.358	5	3	6	3	824	91.8	6.1	17.79	3	0	6.45	0.0206819	114.94	143.7	56.3	3.74	23.85	337087	590891	106974	81747.8	1
495	P39105	Lysophospholipase 1	High	High	High	High	High	0	14.628	6	4	9	4	664	71.6	4.73	19.95	4	0	6.927	0.0218796	1099.26	156.8	43.2	4.72	53.47	679413	1.20761e+06	121733	146650	1
1707	P40098	Uncharacterized mitochondrial membrane protein FMP10	High	High	Peak Found	Peak Found	Medium	0.022	2.046	3	1	2	1	244	27.7	9.76	0	1	0	0.194	0.0220651	51.95	32.5	167.5		46.77	7457.07		25495.9	27557.6	1
1705	P28004	Pre-mRNA-processing protein 45	Peak Found	Peak Found	High	Peak Found	Medium	0.037	1.724	3	1	1	1	379	42.5	9.13	0	1	0	0.197	0.0227628	60.84	32.9	167.1	6.99	55.99	44935.8	82474.3	147950	185860	1
1661	Q12453	Cytoplasmic export protein 1	High	High	High	Peak Found	High	0	7.572	4	3	5	3	761	84.7	5.41	9.1	3	0	0.314	0.0233903	46.56	59.4	140.6	25.94	32.68	258464	622741	544832	474206	1
1687	P39931	Protein SSP120	High	High	High	High	High	0	12.357	20	4	11	4	234	27.3	5.11	23.91	4	0	0.316	0.0244794	46.56	46.2	153.8	6.81	38.4	437366	800702	1.08418e+06	1.02877e+06	1
741	P02293	Histone H2B.1	High	High	High	High	High	0	20.661	46	6	22	6	131	14.2	10.1	38.73	6	0	6.673	0.0267914	102.97	139.3	60.7	5.1	25.21	5.95448e+06	9.21041e+06	1.95467e+06	1.52373e+06	1
273	P26786	40S ribosomal protein S7-A	High	High	High	High	High	0	51.607	69	12	56	7	190	21.6	9.83	138.51	12	5	6.644	0.0273811	126.54	187.1	12.9	11.13	39.78	3.02876e+07	4.30059e+07	1.35688e+06	1.31509e+06	1
310	P20107	Zinc/cadmium resistance protein	High	High	High	Peak Found	High	0	19.854	10	2	16	2	442	48.3	6.35	54.05	2	0	6.604	0.028278	88.02	177.2	22.8	9.38	93.27	981921	1.42938e+06	244397	27258.1	1
302	P11433	Cell division control protein 24	High	Peak Found	Peak Found	Not Found	Medium	0.023	2.02	1	1	1	1	854	96.9	8.46	2.2	1	0	8.796	0.0300628	9.31	179.6	20.4	8.86		44398.1	83680.2	5031.54		1
314	P00425	Cytochrome c oxidase subunit 5B, mitochondrial	High	Not Found	Peak Found	Not Found	High	0	11.118	15	2	6	1	151	17.2	9.8	14.27	2	1	5.77	0.0300628	95.18	176.5	23.5	5.17	33.72	555521	858383	52436.1	46355.1	1
296	P09959	Regulatory protein SWI6	Peak Found	High	Peak Found	Not Found	High	0.007	2.445	2	1	1	1	803	90.5	4.87	0	1	0	9.258	0.0301268	18.16	180.5	19.5	17.2		24326.4	51639.8	2779.87		1
329	P35179	Protein transport protein SSS1	High	High	High	Peak Found	High	0	5.063	13	1	13	1	80	8.9	9.45	32.23	1	0	6.519	0.0301268	3.73	173.4	26.6	0.89	3.58	8125668	1.36811e+07	1.20463e+06	622520	1
362	P22214	Protein transport protein SEC22	High	High	High	Peak Found	High	0	20.532	22	4	13	4	214	25	7.27	38.96	4	0	6.516	0.0301268	93.17	168.5	31.5	1.43	26.32	1.19463e+06	2.02677e+06	255058	95142.2	1
1567	P37302	Aminopeptidase Y	High	Peak Found	High	High	High	0	6.356	6	3	6	3	537	60.1	5.31	7.3	3	0	0.342	0.0334196	103.98	82.4	117.6	1.13	19.33	259096	423941	299536	214387	1
1702	P24031	Constitutive acid phosphatase	High	Peak Found	Not Found	Peak Found	Medium	0.029	1.867	2	1	1	1	467	52.7	4.63	0	1	0	0.213	0.0341775	28.01	35.1	164.9	26.25		25830.4	29495.9		51135	1
297	Q04225	Ribosome assembly protein RRB1	High	High	Peak Found	Not Found	High	0	4.33	4	1	2	1	511	57.2	4.63	5.09	1	0	9.198	0.0342158	46.31	180.4	19.6	42.17		28310.2	25445.2	2118.91		1
447	Q12438	Monothiol glutaredoxin-6	High	High	High	Peak Found	High	0	4.974	11	2	7	2	231	25.8	6.37	10.45	2	0	7.125	0.0351308	98.41	160	40	16.75	90.54	209287	441467	117720	14038.3	1
1700	P19211	Eukaryotic translation initiation factor 5A-2	Not Found	High	High	Not Found	High	0.008	2.403	11	1	2	1	157	17.1	4.96	2.78	1	0	0.219	0.0411834	0	35.9	164.1				15299.9	39351.8		1
878	P0CX82	60S ribosomal protein L19-A	High	High	High	High	High	0	50.798	31	9	54	9	189	21.7	11.36	131.61	9	0	6.105	0.0424245	124.05	132.2	67.8	13.59	52.63	1.13075e+07	1.55032e+07	3.33225e+06	3.95912e+06	1
309	P07143	Cytochrome c1, heme protein, mitochondrial	High	High	High	Peak Found	High	0	8.295	10	2	6	2	309	34	8.12	11.91	2	0	6.021	0.0434465	17.32	177.8	22.2	16.29	20.2	337999	445859	40638.5	16569.6	1
399	P53903	Processing of GAS1 and ALP protein 2	High	High	High	High	High	0	17.279	12	3	12	3	129	15	5.76	35.93	3	0	5.93	0.0434465	58.76	164.6	35.4	8.07	49.75	622262	922831	170971	44566.2	1
1704	P53874	Ubiquitin carboxyl-terminal hydrolase 10	Not Found	Peak Found	High	High	High	0	3.777	2	1	2	1	792	88.5	5.5	5.59	1	0	0.209	0.0434465	49.72	34.6	165.4		44.97		14910.9	28845.7	30302.1	1
1701	P38089	Protein phosphatase 2C homolog 4	High	High	Peak Found	Peak Found	High	0	3.779	2	1	3	1	393	44.1	7.39	6.98	1	0	0.218	0.0480592	44.97	35.8	164.2		41.05	36367.2		115973	114608	1
1240	P0CX84	60S ribosomal protein L35-A	High	High	High	High	High	0	53.549	41	9	72	9	120	13.9	10.58	198.75	9	0	5.94	0.0486523	139.45	112	88	7.85	40.69	1.89772e+07	2.82323e+07	9.83115e+06	9.66274e+06	1
1670	Q04214	Transposon Ty1-MR1 Gag-Pol polyprotein	High	High	High	High	High	0	37.256	9	12	17	2	1755	198.8	8.29	37.4	12	0	0.236	0.0529625	42.92	55.8	144.2	12.61		82624.1	114873		99430.3	1
291	P53337	ER-derived vesicles protein ERV29	High	High	Peak Found	Not Found	High	0	5.873	8	2	6	2	310	35	9.63	13.5	2	0	5.8	0.0536508	48.51	182.1	17.9	16.29		341490	450446	27996.1		1
1647	P39004	High-affinity hexose transporter HXT7	Peak Found	High	High	Peak Found	High	0	46.392	21	9	44	1	570	62.7	7.75	96.68	9	0	0.372	0.0550926	138.61	64.5	135.5	37.13	30.88	145602	414460	299904	254122	1
319	P40353	Alcohol O-acetyltransferase 1	High	Peak Found	Not Found	Peak Found	Medium	0.014	2.191	2	1	1	1	525	61	6.96	0	1	0	7.305	0.0552096	1.12	175.9	24.1	1.07		45339.4	76522.7		3182.9	1
332	P05374	Phosphatidylethanolamine N-methyltransferase	High	High	Not Found	Peak Found	High	0.004	2.82	1	1	2	1	869	101.1	8.35	1.89	1	0	6.417	0.0556573	7.1	173	27	6.77		265398	400921		20065.4	1
1650	P34760	Peroxiredoxin TSA1	High	High	High	High	High	0	15.826	38	5	9	5	196	21.6	5.14	20.24	5	0	0.361	0.0573131	96.46	63.7	136.3	29.02	20.51	139690	352167	297614	216682	1
268	P18409	Mitochondrial distribution and morphology protein 10	High	High	Peak Found	Peak Found	High	0	8.796	6	2	4	2	493	56.2	7.3	10.79	2	0	8.098	0.0590521	37.97	188.3	11.7	7.76	53.72	126702	188722	4680.37	5661.04	1
293	P36161	Nucleoporin NUP133	Peak Found	High	Peak Found	Peak Found	High	0	4.007	2	2	2	2	1157	133.2	5.12	2.25	2	0	7.204	0.0611892	89.88	181.4	18.6	26.85	78.23	48343.6	118047	3018.85	5705.15	1
1346	P23301	Eukaryotic translation initiation factor 5A-1	High	High	High	Peak Found	High	0	19.527	25	3	11	3	157	17.1	4.96	29.13	3	0	0.383	0.064617	70.51	105.4	94.6	16.33	63.09	771450	1.0171e+06	933309	194328	1
659	P22146	1,3-beta-glucanosyltransferase GAS1	High	High	High	High	High	0	40.424	19	10	34	10	559	59.5	4.67	80.04	10	0	0.388	0.0684881	111.55	143.7	56.3	7.48	5.51	3.57736e+06	6.61219e+06	1.32955e+06	781342	1
1508	P34240	Zinc-regulated transporter 3	Peak Found	High	High	Not Found	High	0	6.111	6	2	3	2	503	55.4	6.57	6.98	2	0	0.234	0.0684881	0	91.1	108.9	0.13		54987.1	91591.6	61634		1
374	P33754	Translocation protein SEC66	High	High	High	Peak Found	High	0	9.322	11	3	6	3	206	24.2	7.24	14.21	3	0	5.363	0.0695317	88.18	167.1	32.9	5.62	39.46	567685	1.02189e+06	145150	44478.3	1
315	Q03941	Dephospho-CoA kinase CAB5	Peak Found	High	Peak Found	Not Found	Medium	0.032	1.803	6	1	1	1	241	27.3	8.57	1.77	1	0	7.511	0.0698788	45.51	176.5	23.5	41.5		112132	101828	10330.5		1
1694	Q07418	Peroxisomal membrane protein import receptor PEX19	Not Found	Peak Found	High	Not Found	High	0.001	3.04	5	1	1	1	342	38.7	4.39	3.03	1	0	0.25	0.0709584	0	40	160				12696.2	28570.1		1
793	Q12335	Protoplast secreted protein 2	High	High	High	High	High	0	12.282	24	4	11	4	198	21	5.73	16.09	4	0	0.395	0.0737216	137.52	137.3	62.7	31.34	45.07	1.04072e+06	1.10257e+06	255043	268361	1
673	Q08954	Smr domain-containing protein YPL199C	Peak Found	High	Peak Found	High	High	0	7.14	14	3	4	3	240	26.7	6.8	5.93	3	0	7.249	0.0742434	101.81	142.8	57.2	8.33	81.5	84610	125020	15517.6	31382.1	1
1425	P40054	D-3-phosphoglycerate dehydrogenase 1	High	High	Not Found	High	High	0	8.527	8	3	7	1	469	51.2	5.57	13.24	3	2	0.326	0.0742434	6.08	99.7	100.3	30		242306	261846		100030	1
1693	Q06011	Protein ECM19	Peak Found	Peak Found	High	Not Found	Medium	0.023	2.004	8	1	1	1	112	12.5	8.88	0	1	0	0.262	0.0746059	9.44	41.5	158.5	8.98		11052.4	20868.1	42151		1
1697	Q08417	Sphingoid long-chain base transporter RSB1	High	High	High	High	High	0	4.681	5	2	4	2	382	43.2	7.33	5.77	2	0	0.243	0.077707	110.2	38.5	161.5	55.31	29.1	34911.7	25405.1	73530.5	60686.4	1
333	P53090	Aromatic/aminoadipate aminotransferase 1	High	High	Not Found	High	High	0	13.861	9	4	11	4	500	56.1	6.01	23.9	4	0	6.326	0.0829882	35.46	172.8	27.2	13.65		224334	307300		16334.7	1
1082	P36049	rRNA-processing protein EBP2	High	High	High	High	High	0	18.472	12	6	10	6	427	49.7	6.42	17.28	6	0	0.4	0.0839322	103.22	122.3	77.7	21.45	40.23	337554	413347	128582	125486	1
549	P14127	40S ribosomal protein S17-B	High	High	High	High	High	0	79.554	60	12	115	12	136	15.8	10.51	317.55	12	0	5.27	0.0845394	103.52	152.2	47.8	7.6	29.46	4.41505e+07	6.59129e+07	9.95586e+06	8.26119e+06	1
323	P36147	Presequence translocated-associated motor subunit PAM17, mitochondrial	High	High	Peak Found	Not Found	High	0	4.771	10	1	2	1	197	22	9.67	5.81	1	0	7.073	0.0847959	43.83	175.2	24.8	40.09		205916	191119	20365.8		1
812	P04449	60S ribosomal protein L24-A	High	High	High	Peak Found	High	0	20.958	26	4	16	3	155	17.6	11.28	34.8	4	1	5.177	0.0918707	132.96	136.3	63.7	5.91	55.13	3.4453e+06	5.26862e+06	958492	1.18685e+06	1
282	P37292	Serine hydroxymethyltransferase, mitochondrial	High	High	Peak Found	Peak Found	High	0	6.974	6	3	3	3	490	53.7	8.72	4.35	3	0	7.007	0.0936741	90.13	184.7	15.3	46	15.21	232128	196486	11558.8	7798.14	1
304	P32610	V-type proton ATPase subunit D	High	High	High	Peak Found	High	0	10.306	11	2	6	2	256	29.2	5.92	10.55	2	0	5.588	0.0967091	20.96	179.5	20.5	22.68	1.7	334394	402287	30782.6	16336.9	1
1630	Q03103	Endoplasmic oxidoreductin-1	High	High	High	High	High	0	57.533	33	15	46	15	563	65	5.68	92.68	15	0	0.419	0.0967091	70.96	69.2	130.8	9.31	15.65	2.00101e+06	3.79551e+06	3.38158e+06	2.29585e+06	1
1648	P36091	Mannan endo-1,6-alpha-mannosidase DCW1	High	High	Peak Found	High	High	0	9.298	8	3	6	3	449	49.5	4.67	14.11	3	0	0.293	0.0970596	53.16	64.3	135.7	73.87	15.22	37415.6	198248	147185	64466.3	1
1711	P0CX27	60S ribosomal protein L42-A	High	High	High	High	High	0	5.392	15	2	8	2	106	12.2	10.59	13.47	2	0	0.422	0.0995784	115.86	28.2	171.8	39.48	57.3	521952	1.5398e+06	2.58206e+06	3.31594e+06	1
1691	Q12263	Serine/threonine-protein kinase GIN4	High	High	Peak Found	Peak Found	Medium	0.027	1.898	1	1	2	1	1142	129.8	9.2	4.47	1	0	0.278	0.101964	34.54	43.5	156.5	41.01	36.33	17356.2	52424.6	60557.3	55685.6	1
1692	P24521	Phosphomevalonate kinase	Peak Found	High	Peak Found	Peak Found	Medium	0.024	1.974	2	1	1	1	451	50.4	6.49	0	1	0	0.273	0.104368	44.05	42.9	157.1	53.49	43.57	19962.2	14972.6	33400.1	34329.5	1
1633	P00427	Cytochrome c oxidase subunit 6, mitochondrial	High	High	Peak Found	Peak Found	High	0	6.15	15	2	3	2	148	17.3	6.05	7.21	2	0	0.413	0.110722	49.22	68.7	131.3	5.51	46.84	168212	258683	205246	222089	1
298	Q12117	Protein MRH1	High	High	Peak Found	Not Found	High	0	27.849	15	4	29	3	320	36.2	9.19	88.04	4	1	4.89	0.118401	21.6	180	20	1.2	6.34	3743284	6.11896e+06	369681	219848	1
1695	Q12114	Chitin biosynthesis protein CHS5	High	High	High	High	High	0	9.759	5	2	5	2	671	73.6	4.56	12.1	2	0	0.338	0.126335	42.38	39.4	160.6	48	25	83118.1	68156.7	186265	144756	1
335	P07246	Alcohol dehydrogenase 3, mitochondrial	High	High	Peak Found	Not Found	High	0	5.987	4	2	5	1	375	40.3	8.43	5.89	2	0	6.274	0.129817	8.82	172.5	27.5	8.4		46406.5	86890.3	7349.24		1
1135	P39015	Suppressor protein STM1	High	High	High	High	High	0	47.409	38	8	32	8	273	30	9.66	101.71	8	0	0.448	0.130066	122.32	118.7	81.3	11.69	88.96	5.2151e+06	1.02331e+07	7.60806e+06	941757	1
1672	P25371	Probable ATP-dependent permease	High	High	High	High	High	0	7.192	3	3	6	3	1049	117.2	5.16	11.27	3	0	0.358	0.130622	66.49	55.4	144.6	23.36	73.25	75958.3	176249	123651	211677	1
1128	Q12074	Spermidine synthase SPE3	High	High	High	High	High	0	6.721	9	2	4	2	293	33.3	5.53	9.59	2	0	0.286	0.132719	50.87	119.2	80.8	40.51	4.73	73040.7	67353.9	33393.6	19410.8	1
1549	P38845	Cruciform DNA-recognizing protein 1	High	High	High	High	High	0	15.825	11	4	12	4	465	51.1	7.34	23.73	4	0	0.451	0.13291	93.48	85.9	114.1	7.73	38.59	266472	397119	236952	225502	1
421	P15180	Lysine--tRNA ligase, cytoplasmic	High	High	High	Peak Found	High	0	4.103	3	2	4	2	591	67.9	6.13	7.28	2	0	4.388	0.134817	66.73	161.8	38.2	25.95	21.85	353308	851342	109970	43783.7	1
406	P38256	Probable thioesterase YBR096W	High	High	High	Peak Found	High	0	4.855	5	1	3	1	230	27.1	8.44	8.5	1	0	4.526	0.136701	22.01	163.8	36.2	10.03	22.26	319205	611721	60492.1	45171.9	1
372	P40986	Cell division control protein 1	High	High	High	Peak Found	High	0.003	2.969	4	1	5	1	491	57.1	9.44	12.55	1	0	5.116	0.145291	108.08	167.3	32.7	4.57	85.06	273866	426803	97267.6	13158	1
446	P05740	60S ribosomal protein L17-A	High	High	High	High	High	0	63.687	50	10	96	1	184	20.5	10.92	275.3	10	8	4.643	0.146767	78.83	160.1	39.9	20.07	26.4	3.19411e+07	3.99021e+07	5.34669e+06	4.24112e+06	1
303	P12945	N-terminal acetyltransferase A complex subunit NAT1	High	High	Peak Found	High	High	0	18.092	8	5	11	5	854	98.8	8.78	20.15	5	0	4.638	0.14714	75.48	179.6	20.4	32.2	55.99	2.79531e+06	2.92337e+06	155019	194725	1
664	P40212	60S ribosomal protein L13-B	High	High	Not Found	Peak Found	High	0	52.395	45	9	88	1	199	22.5	11.08	227.48	9	8	4.605	0.151773	128.92	143.4	56.6	9.4	31.14	4.02851e+07	7.65089e+07	1.27198e+07	1.08197e+07	1
1686	Q12024	Ribosome biogenesis protein YTM1	Not Found	Peak Found	High	High	High	0.004	2.838	2	1	2	1	460	51.3	6.96	3.65	1	0	0.303	0.154259	70.49	46.5	153.5		60.72		18876.3	22168.3	30187.6	1
1683	P53322	High-affinity nicotinic acid transporter	Peak Found	Peak Found	Peak Found	High	High	0.001	3.386	2	1	1	1	534	60.1	6.84	2.78	1	0	0.307	0.154446	73.3	47	153	18.18	69.34	11557.3	24883.2	23466.8	37302.9	1
277	P53012	Acyl-coenzyme A diphosphatase SCS3	High	High	Peak Found	Peak Found	High	0	6.046	7	2	3	2	380	42.7	9.8	7.73	2	0	5.52	0.155888	66.33	185.9	14.1	12.26	89.61	167288	330904	6131.05	14862.7	1
1595	P19146	ADP-ribosylation factor 2	High	High	High	High	High	0	14.277	24	4	12	4	181	20.6	7.34	21.2	4	0	0.471	0.155888	110.67	77.1	122.9	6.38	3.11	234636	426928	374850	195011	1
343	P20606	Small COPII coat GTPase SAR1	High	High	High	High	High	0	44.636	49	8	34	8	190	21.4	5.38	90.2	8	0	4.557	0.15712	127.5	170.9	29.1	32.59	28.34	4.57979e+06	4.76171e+06	708672	256638	1
1678	Q08004	Bud site selection protein 20	Peak Found	High	High	Peak Found	Medium	0.023	1.975	7	1	2	1	166	18.5	8.9	4.08	1	0	0.322	0.157204	38.17	48.7	151.3	34.66	44.4	20740.9	20908.7	33951.4	35349.1	1
346	P40071	Transmembrane 9 superfamily member 3	High	High	Peak Found	Not Found	High	0	7.426	4	2	4	2	706	81.5	7.43	10.04	2	0	5.78	0.161658	97.27	170.5	29.5	11.41		126999	248186	22340.6		1
386	Q12233	ATP synthase subunit g, mitochondrial	High	High	High	Peak Found	High	0	4.327	10	1	5	1	115	12.9	9.82	12.59	1	0	4.908	0.164346	73.35	166.1	33.9	10.29	66.44	257438	369931	27421.3	41324.3	1
1685	P20604	Serine/threonine-protein phosphatase PP1-1	High	High	Peak Found	Peak Found	High	0	4.484	7	2	2	2	311	35.5	5.4	4.89	2	0	0.305	0.164475	34.17	46.8	153.2	8.57	33.64	35963.5	67504.7	91990.2	81228.8	1
481	P27514	Low-affinity phosphate transporter PHO91	High	High	High	High	High	0	13.382	6	4	12	4	894	99.4	8.02	23.52	4	0	4.481	0.167486	113.16	157.9	42.1	10.02	43.3	734207	1.40689e+06	143564	146930	1
1682	Q3E764	Translation machinery-associated protein 7	Peak Found	High	High	High	High	0	4.92	20	1	4	1	64	6.9	10.26	10.08	1	0	0.314	0.167486	14.33	47.8	152.2	13.94	3.38	39154.9	79328.3	132059	68440.7	1
345	P23542	Aspartate aminotransferase, cytoplasmic	Peak Found	High	Peak Found	Peak Found	High	0	6.316	5	2	2	2	418	46	8.32	4.29	2	0	5.796	0.170132	14.75	170.6	29.4	9.83	14.99	165615	239566	27757	12196.7	1
1519	P06780	GTP-binding protein RHO1	High	High	High	High	High	0	23.542	36	5	27	5	209	23.1	6.23	60.07	5	0	0.481	0.170132	92.91	90	110	9.53	49.64	2.56985e+06	3.73286e+06	1.90672e+06	2.1577e+06	1
1657	P53297	PAB1-binding protein 1	Peak Found	High	High	High	High	0	9.504	7	3	4	3	722	78.7	6.92	6.65	3	0	0.316	0.170132	88.36	60.1	139.9	2.82	37.82	35192	60891.4	59431.1	55897.2	1
1677	P34078	Protein LTV1	Peak Found	Peak Found	High	Not Found	Medium	0.014	2.201	2	1	1	1	463	53.4	4.67	1.73	1	0	0.334	0.171557	60.85	50	150	53.69		19826.1	14820.3	37313.4		1
1275	Q12154	ATPase GET3	High	High	High	High	High	0	9.198	9	4	10	4	354	39.3	5	18.43	4	0	0.484	0.174381	125.6	110.1	89.9	27.5	37.26	817748	2.01603e+06	581806	542544	1
1609	P38212	Protein RCR1	High	High	Peak Found	High	High	0	7.408	17	2	3	2	213	23.9	6.7	5.56	2	0	0.311	0.174719	24.33	74.9	125.1	14.54	6.89	48426.5	98957	79956.5	47922.4	1
383	P28791	Protein transport protein SEC20	High	High	Peak Found	Peak Found	High	0	9.307	11	3	5	3	383	43.9	6.02	13.77	3	0	4.236	0.17523	92.14	166.6	33.4	2.96	77.29	315572	547066	32789.2	60791.8	1
1675	P40079	U3 small nucleolar ribonucleoprotein protein LCP5	Peak Found	Peak Found	High	High	High	0.001	3.147	3	1	2	1	357	40.8	6.92	3.74	1	0	0.339	0.179143	34.74	50.6	149.4	22.28	37.46	13890.2	31729.7	34290	32072.9	1
1426	P10591	Heat shock protein SSA1	High	High	High	High	High	0	272.974	60	39	367	9	642	69.6	5.11	971.86	39	0	0.488	0.179331	97.13	99.6	100.4	6.68	11.01	5.15238e+06	7.79329e+06	5.01251e+06	2.33124e+06	1
1676	P21825	Translocation protein SEC62	Peak Found	High	Peak Found	Peak Found	High	0.006	2.578	4	1	1	1	274	31.3	9.72	2.4	1	0	0.339	0.180889	83.27	50.6	149.4	84.34	38.56	10155	66773.7	42224.5	40163.4	1
353	P47159	Uncharacterized membrane protein YJR124C	High	High	Peak Found	Peak Found	High	0.004	2.787	2	1	3	1	448	49.6	7.59	0	1	0	5.556	0.181062	60.69	169.5	30.5	37.33	66.85	48220.5	46682.2	10363.8	2017.18	1
411	Q12001	Dolichyl pyrophosphate Man9GlcNAc2 alpha-1,3-glucosyltransferase	High	High	Not Found	High	High	0	8.487	5	2	7	2	544	62.7	9.11	20.08	2	0	5.024	0.187705	0	162.9	37.1	123.73		15706.3	391396		7046.45	1
921	P07263	Histidine--tRNA ligase, mitochondrial	High	High	High	High	High	0	7.384	4	2	5	2	546	59.9	7.71	13.56	2	0	4.366	0.191378	127.18	130.2	69.8	6.98	59.5	233547	428591	78696.4	104932	1
1698	P53551	Histone H1	High	High	Peak Found	Peak Found	High	0	6.38	13	3	3	3	258	27.8	10.21	6.88	3	0	0.497	0.19504	84.33	38	162	39.33	48.75	92849	273293	344678	384519	1
363	P40470	Regulator of rDNA transcription protein 14	High	Peak Found	Peak Found	Not Found	High	0.001	3.252	6	1	1	1	206	23.8	9.82	2.95	1	0	5.34	0.197788	50.97	168.5	31.5	45.98		34838.4	29500.2	4359.63		1
1561	Q08746	Regulator of ribosome biosynthesis	High	High	High	High	High	0	5.81	11	2	5	2	203	22.9	9.47	4.65	2	0	0.401	0.202558	48.65	83.4	116.6	46.53	44.34	152259	127797	102274	106394	1
1674	P25365	Putative guanine nucleotide-exchange factor SED4	High	High	High	High	High	0	5.029	2	2	7	2	1065	114	4.73	11.62	2	0	0.354	0.207061	35.59	52.3	147.7	37.36	18.58	49532.9	141491	150334	106456	1
378	Q92316	Dolichyl-diphosphooligosaccharide--protein glycosyltransferase subunit OST5	Peak Found	High	Peak Found	Not Found	High	0.001	3.579	15	1	1	1	86	9.5	9.11	2.66	1	0	5.021	0.207573	46.68	166.8	33.2	42.47		28852.1	89146.3	7333.77		1
364	P43633	Serine/threonine-protein kinase Haspin homolog ALK1	Peak Found	High	Peak Found	Peak Found	High	0.01	2.338	3	1	1	1	760	86	9.6	0	1	0	5.338	0.211226	48.77	168.4	31.6	18.38	49.65	20183.8	43583.1	2796.03	3164.56	1
742	P05739	60S ribosomal protein L6-B	High	High	High	High	High	0	43.207	47	9	90	4	176	20	10.08	199.49	9	5	4.2	0.211971	138.96	139.3	60.7	13.51	44.62	3.18244e+07	4.36816e+07	8.51857e+06	8.89998e+06	1
380	P38825	Protein TOM71	High	High	Peak Found	Peak Found	High	0	10.634	8	4	4	4	639	71.8	6.14	9.32	4	0	4.12	0.214777	70.93	166.7	33.3	4.88	2.36	326856	507190	60095.9	31595.5	1
427	P54780	60S ribosomal protein L15-B	High	High	High	High	High	0	31.622	34	7	58	1	204	24.4	11.39	119.84	7	0	4.183	0.214777	50.02	161.4	38.6	8.99	47.85	2.68653e+06	5.07257e+06	450554	495435	1
1138	P53845	Protein transport protein YIF1	Peak Found	High	High	Peak Found	High	0	4.409	7	2	2	2	314	35.5	8.87	4.34	2	0	0.341	0.217586	62.46	118.5	81.5	35.71	27.84	52434.3	146080	53341	19459	1
1637	P53730	Dol-P-Man:Man(7)GlcNAc(2)-PP-Dol alpha-1,6-mannosyltransferase	High	High	High	High	High	0	6.232	4	3	6	3	551	62.6	7.09	5.6	3	0	0.438	0.217764	97.6	68.1	131.9	63.15	45.68	78244.9	339988	164163	174418	1
1634	P12868	E3 ubiquitin-protein ligase PEP5	Peak Found	Peak Found	High	High	Medium	0.011	2.284	1	1	3	1	1029	117.4	5.83	0	1	0	0.522	0.220456	11.11	68.6	131.4	0.16	10.58	266560	444191	443752	280267	1
1445	P32891	D-lactate dehydrogenase	High	High	High	High	High	0	14.874	12	5	9	5	587	65.3	6.83	20.1	5	0	0.501	0.221633	86.3	97.3	102.7	16.57	36.81	203140	427403	173001	160228	1
530	Q04338	t-SNARE VTI1	High	High	High	High	High	0	17.214	19	3	14	3	217	24.7	6.62	32.01	3	0	4.105	0.230434	90.08	153.5	46.5	9.95	26.21	777500	1.48833e+06	196082	155107	1
373	Q08925	RNA-binding protein MRN1	Peak Found	High	Peak Found	Not Found	Medium	0.027	1.9	1	1	1	1	612	68.6	5.9	2.18	1	0	5.101	0.230954	130.14	167.2	32.8	93.3		10535.1	85422.3	4270.04		1
1713	P29465	Chitin synthase 3	High	High	High	High	High	0	9.852	2	3	6	3	1165	131.5	6.71	6.6	3	0	0.447	0.230954	93.79	24.5	175.5	26.91	35.65	44433.1	108584	279666	254506	1
301	P16547	Mitochondrial outer membrane protein OM45	High	High	High	Peak Found	High	0	8.874	9	3	4	3	393	44.6	8.59	8.04	3	0	0.356	0.232245	31.98	179.7	20.3	15.84	34.52	94003.6	195696	8684.67	7770.8	1
687	P40339	Replication factor C subunit 4	High	High	Peak Found	Peak Found	High	0	8.95	13	3	5	3	323	36.1	9.1	11.04	3	0	4.066	0.236779	79.78	142.1	57.9	19.64	52.95	2.58402e+06	5.68203e+06	765329	914053	1
1696	P22217	Thioredoxin-1	High	Peak Found	High	High	High	0	8.656	24	2	4	2	103	11.2	4.93	8.69	2	0	0.367	0.236779	49.39	39.3	160.7	12.78	41.99	43209.9	59932.2	111347	111655	1
349	Q02785	ATP-dependent permease PDR12	High	High	High	High	High	0	24.52	6	8	16	7	1511	171	6.84	31.38	8	0	3.647	0.247742	57.88	169.9	30.1	3.35	67.89	468211	816142	134296	25650	1
1506	P03962	Orotidine 5'-phosphate decarboxylase	High	High	High	Peak Found	High	0	9.306	11	3	6	3	267	29.2	7.36	11.62	3	0	0.535	0.250729	88.5	91.4	108.6	12.85	109	535799	742368	1.51266e+06	106464	1
381	Q04177	U3 small nucleolar RNA-associated protein 5	High	High	Peak Found	Peak Found	High	0	9.807	5	2	3	2	643	72	4.94	8.33	2	0	5.01	0.255342	105.51	166.7	33.3	86	10.4	72448.7	29353.2	6209.45	3911.37	1
648	Q12450	Protein ERP4	High	High	Peak Found	Peak Found	High	0	8.532	14	2	5	2	207	23.5	6.79	10.75	2	0	3.848	0.255342	107.11	144.4	55.6	35.23	35.99	380351	380138	137898	44551.5	1
1627	P39954	Adenosylhomocysteinase	High	High	High	Peak Found	High	0	20.451	18	7	13	7	449	49.1	6.24	30.49	7	0	0.541	0.25917	132.08	70.1	129.9	18.39	38.35	545299	697925	1.09694e+06	341916	1
379	P43609	Chromatin structure-remodeling complex protein RSC8	Peak Found	High	Peak Found	Not Found	Medium	0.019	2.15	1	1	1	1	557	63.1	5.38	0	1	0	5.026	0.261228	47.87	166.8	33.2	43.45		40759.2	35909.7	5527.24		1
1076	P39516	40S ribosomal protein S14-B	High	High	High	High	High	0	69.581	64	11	95	11	138	14.6	10.54	239.93	11	0	3.953	0.261228	135.57	122.5	77.5	16.2	58.03	5.39947e+07	7.13108e+07	1.84408e+07	2.39783e+07	1
1669	P06704	Cell division control protein 31	High	Peak Found	High	Peak Found	High	0.001	3.368	7	1	2	1	161	18.7	4.56	4.94	1	0	0.391	0.262643	67.32	56.2	143.8	65.99	21.05	34246.8	20706.3	42607.3	31266.1	1
409	P38970	Serine/threonine-protein kinase HAL5	Peak Found	High	Peak Found	Peak Found	High	0.001	3.461	1	1	1	1	855	95.4	8.4	2.29	1	0	4.443	0.271137	58.94	163.3	36.7	8.77	55.1	43861.7	64402	5756.77	7124.85	1
1671	P53299	Mitochondrial import inner membrane translocase subunit TIM13	High	High	High	High	High	0.001	3.626	10	1	4	1	105	11.3	8.16	7.59	1	0	0.384	0.27155	31.28	55.5	144.5	33.09	36.59	37022.4	38209.5	54558.4	50360.7	1
389	Q99257	mRNA export factor MEX67	High	High	Peak Found	High	High	0.001	3.613	2	1	3	1	599	67.3	9.2	4.54	1	0	4.778	0.275126	71.23	165.4	34.6	0.41	61.39	145518	240538	17862	24605.6	1
914	P32474	Protein disulfide-isomerase EUG1	High	High	High	Peak Found	High	0	7.332	7	3	4	3	517	58.9	4.91	8.61	3	0	0.407	0.275126	0.58	130.4	69.6	19.51	0.56	115770	254061	66722.9	35988.5	1
1471	P36421	Tyrosine--tRNA ligase, cytoplasmic	High	High	High	High	High	0	30.388	20	8	21	8	394	44	8.44	51.02	8	0	0.552	0.275126	91.55	94.9	105.1	13.89	40.39	802646	1.625e+06	684516	669631	1
1688	Q3E754	40S ribosomal protein S21-B	High	High	High	Peak Found	High	0	6.971	22	2	5	2	87	9.8	6.06	11.49	2	0	0.551	0.275126	55.76	44.9	155.1	6.16	13.85	243940	442479	747425	494572	1
290	Q06103	26S proteasome regulatory subunit RPN7	Peak Found	High	High	Peak Found	High	0	8.865	7	3	3	3	429	48.9	5.25	5.14	3	0	4.851	0.275587	57.34	182.5	17.5	12.57	56.54	85164.3	118478	4592.2	5821.99	1
498	P26784	60S ribosomal protein L16-A	High	High	High	Peak Found	High	0	32.277	36	10	76	6	199	22.2	10.48	153.56	10	4	3.88	0.275587	101.85	156.7	43.3	12.24	45.54	3.64505e+07	7.20854e+07	7.36499e+06	7.80726e+06	1
1667	Q08951	AP-3 complex subunit delta	Peak Found	Not Found	High	Peak Found	Medium	0.021	2.104	2	1	1	1	932	106.9	5.08	2.16	1	0	0.401	0.275587	20.84	57.3	142.7		19.69	21109		42826.8	30812	1
347	P43586	60S ribosomal subunit assembly/export protein LOC1	High	High	High	High	High	0	17.889	26	4	11	4	204	23.6	10.32	23.69	4	0	3.876	0.27605	58.04	170.5	29.5	2.39	53.99	883904	1.42071e+06	94233.1	114490	1
1663	P53200	Protein-lysine N-methyltransferase EFM5	High	High	Peak Found	Peak Found	Medium	0.023	1.989	4	1	2	1	248	28.6	4.89	4.07	1	0	0.41	0.291236	36.16	58.2	141.8	42.15	34.23	26486.9	23813.2	34751.9	30956.7	1
1264	P38426	Trehalose synthase complex regulatory subunit TPS3	High	High	Peak Found	High	High	0	8.046	3	3	5	3	1054	118.8	6.37	10.72	3	0	0.413	0.299072	67.39	110.8	89.2	22.21	68.37	76845.2	175370	40076.4	62568.7	1
572	P39939	40S ribosomal protein S26-B	High	High	High	High	High	0	14.028	20	2	36	2	119	13.4	10.9	71.72	2	0	3.781	0.302273	62.06	150.8	49.2	7.22	31.62	1.21919e+07	2.24503e+07	3.12359e+06	2.67602e+06	1
1530	P11745	Ran GTPase-activating protein 1	High	High	High	High	High	0	46.043	29	11	32	11	407	45.8	4.61	73.42	11	0	0.567	0.302273	67.39	88.7	111.3	28.68	36.83	980584	2.45962e+06	1.84754e+06	589319	1
1143	P53981	Polyol phosphate phosphatase PYP1	High	High	High	High	High	0	11.559	19	3	10	3	241	27.5	5.45	20.16	3	0	3.774	0.304136	197.89	118.1	81.9	1.89	35.89	1.10297e+06	1.78539e+06	544871	497695	1
1540	P41057	40S ribosomal protein S29-A	High	High	High	High	High	0	8.918	48	4	12	4	56	6.7	10.27	19.28	4	0	0.573	0.313281	57.02	87.6	112.4	60.49	44.82	1.75256e+06	7.26902e+06	2.39451e+06	2.50962e+06	1
459	P38620	Ribose-phosphate pyrophosphokinase 2	High	High	High	High	High	0	15.41	16	5	9	4	318	34.7	6.46	23.45	5	1	3.653	0.317793	82.88	159.3	40.7	15.27	66.81	343670	459991	123322	24022.5	1
1147	P11632	Non-histone chromosomal protein 6A	High	High	High	High	High	0	10.035	15	2	7	2	93	10.8	9.76	20.63	2	0	0.579	0.326416	71.02	118	82	21.31	29.13	458644	1.03305e+06	281898	232748	1
428	P38251	Replication factor C subunit 5	High	High	High	Peak Found	High	0.002	3.003	2	1	4	1	354	39.9	8.21	5.83	1	0	4.187	0.334671	5.56	161.4	38.6	0.38	5.31	181004	299331	41916.9	21137.3	1
1017	Q03973	High mobility group protein 1	High	High	High	High	High	0	18.247	21	5	11	5	246	27.5	8.51	25.31	5	0	0.538	0.334671	129.73	125	75	3.62	11.77	241943	382159	121759	78214.2	1
1548	P39929	Vacuolar-sorting protein SNF7	Peak Found	High	Peak Found	High	High	0	6.493	10	2	3	2	240	27	4.72	3.98	2	0	0.497	0.335624	82.02	86.4	113.6	1.03	85.11	140012	229413	85302.7	186534	1
1665	P38912	Eukaryotic translation initiation factor 1A	Peak Found	Peak Found	High	Peak Found	Medium	0.039	1.7	8	1	1	1	153	17.4	4.83	0	1	0	0.407	0.335624	35.01	57.9	142.1	29.54	39.63	37191.7	94482.7	79289.9	76668.5	1
407	P38341	MICOS complex subunit MIC12	High	High	Peak Found	Not Found	High	0.001	3.464	11	1	2	1	106	12.4	8.4	5.16	1	0	4.519	0.337886	21.24	163.8	36.2	20.05		98102.6	122587	17621.1		1
366	P46985	Probable alpha-1,6-mannosyltransferase MNN11	High	High	High	Peak Found	High	0	20.619	19	6	15	6	422	47.8	8.37	36.97	6	0	3.648	0.339153	56.44	168.3	31.7	17.9	33.6	1.36247e+06	1.75619e+06	165983	146480	1
473	P43555	Protein EMP47	High	High	High	High	High	0	40.576	31	9	32	9	445	50.3	5.97	77.29	9	0	3.651	0.339153	69.61	158.3	41.7	7.09	48.64	1.84253e+06	2.77074e+06	301754	336065	1
1658	P38810	SED5-binding protein 3	High	High	Not Found	Peak Found	High	0	3.979	1	1	2	1	929	103.9	6.29	4.97	1	0	0.43	0.339153	9.09	60.1	139.9	8.66		32284	60672.1		40660.3	1
1660	P39678	Transcription factor MBP1	High	Peak Found	Peak Found	Peak Found	Medium	0.011	2.288	2	1	1	1	833	93.9	9.28	0	1	0	0.423	0.339153	46.21	59.5	140.5	27.28	50.1	6260	15381.2	11620.1	13249.3	1
1664	Q04500	U3 small nucleolar RNA-associated protein 14	Peak Found	Peak Found	Peak Found	High	Medium	0.014	2.205	1	1	1	1	899	103	5.06	2.08	1	0	0.409	0.339153	30.57	58.1	141.9	33.11	35.81	19375.9	19991.4	26969.6	24604.6	1
1197	P23644	Mitochondrial import receptor subunit TOM40	High	High	High	High	High	0	24.371	23	7	29	7	387	42	5.54	64.38	7	0	0.591	0.345822	94.86	114.6	85.4	9.13	35.19	4.42776e+06	6.46869e+06	2.24726e+06	2.03119e+06	1
708	Q02776	Mitochondrial import inner membrane translocase subunit TIM50	High	High	High	Peak Found	High	0	13.842	8	3	6	3	476	55.1	7.24	9.93	3	0	0.45	0.346723	72.87	141.4	58.6	29.08	71.03	115909	292474	96194.7	17326.7	1
275	P11491	Repressible alkaline phosphatase	High	High	Peak Found	Peak Found	High	0	10.372	8	3	5	3	566	63	5.59	10.26	3	0	3.568	0.351129	90.61	186.9	13.1	8.64	47.86	326805	480778	14201.6	15619.4	1
390	Q04651	ER-derived vesicles protein ERV41	High	High	Peak Found	Peak Found	High	0	13.048	7	2	4	2	352	40.7	4.89	11.16	2	0	3.369	0.351129	59.61	165.4	34.6	1.45	53.78	436665	711272	56725.7	68688.9	1
413	Q01662	Methionine aminopeptidase 1	High	High	Peak Found	Peak Found	High	0.006	2.554	3	1	2	1	387	43.3	7.88	1.83	1	0	4.342	0.351129	77.38	162.6	37.4	3.74	66.8	34583.7	60624.5	4583.65	6953.7	1
503	P46654	40S ribosomal protein S0-B	High	High	High	High	High	0	47.535	43	7	68	1	252	27.9	4.75	180.79	7	0	3.608	0.351129	208.65	156.6	43.4	22.01	120.87	959964	1.16607e+06	760840	32402.9	1
555	P15624	Phenylalanine--tRNA ligase beta subunit	High	High	High	Peak Found	High	0	17.977	11	5	8	5	595	67.3	5.78	17.43	5	0	3.796	0.351129	95.11	152.1	47.9	24.9	2.32	216424	513573	75037.7	42152.4	1
1514	P16550	Protein APA1	High	High	High	High	High	0	32.671	38	9	32	9	321	36.5	5.02	72.17	9	0	0.596	0.351129	36.81	90.5	109.5	0.93	7.91	2.29138e+06	3.86008e+06	2.76357e+06	1.34315e+06	1
1652	P41815	Valine amino-acid permease	Peak Found	High	High	High	High	0	7.182	5	3	5	3	604	67.3	8.16	3.51	3	0	0.446	0.351129	83.55	63.4	136.6	11.53	46.08	56945.8	111481	88904.6	95044.6	1
416	P32916	Signal recognition particle receptor subunit alpha homolog	High	High	High	Peak Found	High	0	12.703	8	3	8	3	621	69.2	7.17	19.84	3	0	3.536	0.352301	48.94	162.3	37.7	0.22	36.24	297681	496473	49870.1	45790.4	1
294	P15565	tRNA (guanine(26)-N(2))-dimethyltransferase, mitochondrial	High	High	Peak Found	Peak Found	High	0	18.401	14	6	8	6	570	64	9.09	19.96	6	0	3.357	0.361022	40.03	181.2	18.8	1.17	54.91	401326	656245	58282	13960.2	1
417	Q08110	Putative uncharacterized protein YOL014W	High	High	Not Found	Peak Found	High	0.001	3.604	9	1	2	1	124	13.9	6.74	4	1	0	4.31	0.361022	32.56	162.3	37.7	30.34		69190.2	177861		10159.5	1
439	P53115	Chromatin-remodeling ATPase INO80	Peak Found	High	Not Found	Peak Found	High	0.002	2.994	1	1	1	1	1489	171.3	5.74	1.88	1	0	4.079	0.361022	35.25	160.6	39.4	32.72		38851.1	103468		6135.1	1
435	P38172	MIOREX complex component 3	Peak Found	High	Not Found	Peak Found	High	0.006	2.649	3	1	1	1	270	30.5	7.9	1.96	1	0	4.085	0.361536	217.93	160.7	39.3	116.93		208446	32855.1		7996.21	1
1654	Q12408	Phosphatidylglycerol/phosphatidylinositol transfer protein	High	High	High	High	High	0.006	2.607	6	1	4	1	173	19.1	4.44	9.12	1	0	0.446	0.361536	48.74	61.7	138.3	8.95	46.75	69943.8	131991	110932	119865	1
1387	P38968	Protein transport protein SEC31	High	High	High	Peak Found	High	0	16.452	5	5	12	5	1273	138.6	5.72	23.37	5	0	0.603	0.361544	78.97	102.7	97.3	10.2	20.89	551312	1.05907e+06	452874	331538	1
1690	P25656	Cell division control protein 50	Peak Found	Peak Found	High	High	High	0	5.426	6	2	2	2	391	45	7.72	4.06	2	0	0.454	0.361544	40.34	44.2	155.8	24.12	48.03	13727.8	32206.7	37802.6	41690.2	1
1656	P53218	Ribonucleases P/MRP protein subunit POP6	Peak Found	High	Not Found	Peak Found	Medium	0.032	1.792	4	1	1	1	158	18.2	9.26	0	1	0	0.431	0.364311	110.66	60.2	139.8	84.59		3416.73	22590.5		8053.66	1
962	P39940	E3 ubiquitin-protein ligase RSP5	High	High	High	High	High	0	19.099	6	3	6	3	809	91.8	6.7	16.36	3	0	0.458	0.366632	15.8	127.8	72.2	52.99	15.5	196320	148451	62736.4	42501.4	1
356	P32588	Nuclear and cytoplasmic polyadenylated RNA-binding protein PUB1	High	High	High	High	High	0	9.233	7	3	9	3	453	50.7	5.11	17.31	3	0	3.237	0.373867	112.24	169.3	30.7	10.95	120.11	574479	817870	25775.5	171990	1
785	Q96VH5	MICOS complex subunit MIC10	High	High	High	High	High	0	7.811	23	2	6	2	97	10.4	10.2	13.7	2	0	0.623	0.37413	77.13	137.6	62.4	19.41	44.04	538449	679093	144132	149217	1
516	Q12213	60S ribosomal protein L7-B	High	Peak Found	High	Peak Found	High	0	59.908	47	13	114	1	244	27.7	10.15	325.67	13	0	3.418	0.376769	47.15	154.7	45.3	49.37	22.18	437296	350758	71020.6	52974.8	1
1186	P18238	ADP,ATP carrier protein 3	High	High	High	High	High	0	37.54	32	11	37	6	307	33.3	9.8	72.74	11	0	0.611	0.376769	87.4	115.4	84.6	31.73	21.47	913700	2.398e+06	676272	499246	1
485	P00927	Threonine dehydratase, mitochondrial	High	High	High	High	High	0	43.873	27	11	29	11	576	63.8	8.53	62.49	11	0	3.505	0.377352	91.57	157.7	42.3	4.17	32.12	1.8898e+06	3.3328e+06	388101	334999	1
338	P48415	COPII coat assembly protein SEC16	High	High	Peak Found	High	High	0	9.97	3	4	6	4	2195	241.5	5.38	6.79	4	0	4.168	0.3804	35.73	172.3	27.7	14.29	7.92	75403.6	102351	10833.1	5264.34	1
270	Q12255	Vacuolar v-SNARE NYV1	High	High	Peak Found	Not Found	High	0	10.958	25	3	5	3	253	28.9	5.66	13.92	3	0	4.274	0.383395	24.69	187.5	12.5	47.06		239187	199091	10593.1		1
1655	P16649	General transcriptional corepressor TUP1	High	High	High	High	High	0	5.687	4	2	7	2	713	78.3	5.68	9.3	2	0	0.431	0.383395	27.52	61.3	138.7	14.91	8.76	31385.3	64476.6	69513.4	42783.4	1
423	P36144	Ribosome biogenesis protein UTP30	Peak Found	High	Peak Found	Not Found	High	0.002	2.993	5	1	1	1	274	31.6	9.58	2.24	1	0	4.227	0.387132	41.02	161.7	38.3	37.71		25010.9	71818.6	7280.43		1
1554	P36151	Uncharacterized protein YKR070W	High	Peak Found	High	Peak Found	High	0	4.627	9	2	2	2	352	39.4	8.7	3.68	2	0	0.444	0.387132	38.37	85.6	114.4	38.42	42.73	24179.7	23024.4	16777.1	17018.3	1
761	P49166	60S ribosomal protein L37-A	High	High	High	High	High	0	10.35	32	3	7	3	88	9.8	11.63	7.45	3	0	3.464	0.389955	97.79	138.5	61.5	20.23	69.1	1.71184e+06	2.13376e+06	360762	570945	1
531	P81449	ATP synthase subunit e, mitochondrial	High	High	Peak Found	Peak Found	High	0.001	3.599	10	1	3	1	96	10.9	6.1	4.84	1	0	3.297	0.391285	50.27	153.5	46.5	5.29	46.95	370692	664181	77393.9	83897.2	1
846	P28321	Monoglyceride lipase	High	High	Peak Found	Peak Found	High	0	8.551	11	3	4	3	313	35.5	8.34	4.32	3	0	0.523	0.392066	47.05	133.9	66.1	6.28	99.54	185992	282910	34314.2	107317	1
1689	P46989	Autophagy-related protein 27	High	High	High	High	High	0	15.691	25	6	7	6	271	30.2	5.77	9.31	6	0	0.622	0.395338	136.66	44.4	155.6	23.27	0.07	505008	1.17039e+06	1.95284e+06	1.06276e+06	1
517	P32892	ATP-dependent RNA helicase DRS1	High	High	High	High	High	0	24.321	12	7	17	7	752	84.8	5.74	29.2	7	0	3.438	0.398269	83.4	154.7	45.3	5.22	42.35	631251	1.12984e+06	131665	132767	1
461	P49687	Nucleoporin NUP145	High	High	Peak Found	Peak Found	High	0.004	2.754	1	1	2	1	1317	145.6	5.74	5.11	1	0	3.889	0.398473	68.61	159.1	40.9	10.07	62.94	43562.7	83531.3	18175	3794.36	1
472	P39103	Cytochrome c oxidase assembly protein COX14	High	High	Peak Found	Peak Found	Medium	0.011	2.311	26	1	3	1	70	8	7.24	0	1	0	3.825	0.402341	35.06	158.5	41.5	14.02	35.74	50449.7	68747.7	8634.8	7869.04	1
307	Q01217	Protein ARG5,6, mitochondrial	High	High	Peak Found	Peak Found	High	0	8.4	5	3	5	3	863	94.8	8.27	11.72	3	0	4.02	0.402541	49.81	179	21	1.12	45.95	175578	287317	26804.3	7424.82	1
430	P53266	Cytochrome oxidase assembly protein SHY1	Peak Found	High	Peak Found	Not Found	Medium	0.011	2.278	4	1	1	1	389	45	9.77	2.53	1	0	4.173	0.402748	19.55	161.3	38.7	18.48		20451.6	26140.8	4023.77		1
443	P38985	Signal recognition particle subunit SRP14	High	High	Peak Found	Peak Found	High	0	4.132	8	1	2	1	146	16.4	9.7	5.32	1	0	4.039	0.402748	31.55	160.3	39.7	30.7	36.27	65176.5	168451	14489.1	13311.1	1
514	P32352	C-8 sterol isomerase ERG2	High	High	High	High	High	0	30.601	23	4	35	4	222	24.9	5.91	87.67	4	0	3.418	0.402748	76.29	155.1	44.9	10.05	31.45	6.24578e+06	1.19723e+07	1.4487e+06	1.23802e+06	1
1374	Q05911	Adenylosuccinate lyase	High	High	High	High	High	0	19.126	12	6	14	6	482	54.5	6.43	27.01	6	0	0.627	0.402748	44.9	103.7	96.3	9.54	44.56	665357	1.26623e+06	446813	466368	1
1612	P38077	ATP synthase subunit gamma, mitochondrial	High	High	High	High	High	0	9.115	12	3	7	3	311	34.3	9.31	11.13	3	0	0.551	0.402748	69.19	73.3	126.7	4.48	26.34	156051	243522	202529	160513	1
544	P25358	Elongation of fatty acids protein 2	High	High	High	Peak Found	High	0	4.138	3	1	6	1	347	40	9.51	13.63	1	0	3.227	0.405332	39.28	152.7	47.3	43.61	28.15	467836	411158	120747	43846.3	1
1416	P47122	GPN-loop GTPase 1	High	High	High	High	High	0	17.023	13	5	11	5	385	43.2	4.88	25.87	5	0	0.642	0.40674	60.52	100.1	99.9	5.91	28.6	425279	768755	337708	276655	1
1653	P25339	Pumilio homology domain family member 4	High	High	High	High	High	0.001	3.471	1	1	4	1	888	97.7	6.61	8.73	1	0	0.458	0.40784	19.99	62.8	137.2	20.94	14.79	47272.3	105916	101112	67812.4	1
436	P53898	Protein NSG2	High	High	Not Found	Peak Found	High	0	5.506	5	1	3	1	299	33.6	7.03	8.39	1	0	4.085	0.40795	8.4	160.7	39.3	8		132288	196390		15574.6	1
1475	P09064	Eukaryotic translation initiation factor 2 subunit beta	High	High	High	High	High	0	30.205	44	9	25	9	285	31.6	9.5	49.72	9	0	0.632	0.408403	53.18	94.7	105.3	15.25	27.49	777997	1.04169e+06	597150	481254	1
477	Q02336	Transcriptional adapter 2	Not Found	Peak Found	Peak Found	High	Medium	0.026	1.906	2	1	1	1	434	50.5	6.67	0	1	0	3.769	0.410576	35.89	158.1	41.9		33.27		75249.3	8846.68	7768.65	1
1256	P52917	Vacuolar protein sorting-associated protein 4	High	High	Peak Found	Peak Found	High	0	5.951	6	2	3	2	437	48.1	5.22	6.64	2	0	0.451	0.410576	18.66	111	89	13.26	3.96	68774.6	138007	58300.4	29965.4	1
1544	P40217	Eukaryotic translation initiation factor 3 subunit I	High	High	High	Peak Found	High	0	7.911	16	3	4	3	347	38.7	5.67	9.62	3	0	0.644	0.414043	38.76	87.1	112.9	0.49	39.17	335618	561868	307662	295402	1
615	P23639	Proteasome subunit alpha type-2	High	High	Peak Found	High	High	0	6.511	8	2	4	2	250	27.1	5.72	7.08	2	0	3.96	0.420557	93.23	146.8	53.2	0.47	43.16	134683	225407	33492.2	34202.5	1
324	P38226	2-acyl-1-lysophosphatidylinositol acyltransferase	High	High	Peak Found	Peak Found	High	0	6.944	7	2	4	2	397	45.5	9.33	7.45	2	0	4.116	0.42501	38.24	175	25	22.36	7.24	90548.9	207093	14959.4	7340.09	1
422	Q06632	Protein CFT1	Peak Found	High	Peak Found	Peak Found	Medium	0.029	1.876	1	1	1	1	1357	153.3	5.91	0	1	0	4.241	0.42501	60.97	161.8	38.2	7.87	56.39	109609	163026	15007	18977.7	1
589	P20485	Choline kinase	High	High	High	Peak Found	High	0	9.114	5	3	5	3	582	66.3	5.67	6.89	3	0	0.464	0.42501	128.83	149.2	50.8	21.57	75.61	63975.3	144647	43200.2	7121.51	1
1599	P34237	Protein CASP	Peak Found	High	High	High	High	0	12.574	8	5	9	5	679	77.5	6.06	12.42	5	0	0.581	0.426277	33.6	77	123	5.53	34.49	156645	281637	189907	169836	1
732	P0CX52	40S ribosomal protein S16-B	High	High	High	High	High	0	46.688	59	9	74	9	143	15.8	10.26	151.32	9	0	3.338	0.426599	97.94	139.9	60.1	7.34	34.43	3.17331e+07	4.7553e+07	9.45711e+06	8.44963e+06	1
1108	P25353	Ectonucleotide pyrophosphatase/phosphodiesterase 1	High	High	Peak Found	High	High	0	7.828	3	2	3	2	742	84.7	4.65	5.08	2	0	0.472	0.426599	96.48	120.5	79.5	32.21	29.17	73096.7	193207	46198	38169.5	1
1574	P42838	Alkylphosphocholine resistance protein LEM3	High	High	High	High	High	0	11.48	7	3	7	3	414	47.4	5.94	19.55	3	0	0.643	0.427423	48.14	81.5	118.5	20.68	19.88	390022	870514	534214	385396	1
1645	P40498	U3 small nucleolar RNA-associated protein 25	Peak Found	Peak Found	High	Not Found	Medium	0.014	2.193	3	1	1	1	721	83.9	6.34	0	1	0	0.478	0.428825	17.88	64.7	135.3	16.93		6966.72	9105.44	12087.5		1
1622	Q08179	Mitochondrial distribution and morphology protein 38	High	High	High	High	High	0	17.663	14	7	11	7	573	65	7.77	17.42	7	0	0.647	0.431105	48.46	70.9	129.1	31.6	21.62	227083	594756	416820	308401	1
1072	Q06218	ATP-dependent RNA helicase DBP9	High	High	High	High	High	0	14.488	11	5	7	5	594	68	9.19	10.64	5	0	0.631	0.436108	69.63	122.7	77.3	7.19	24.78	273148	502768	141888	109911	1
1646	Q06593	Oligopeptide transporter 2	High	High	High	Peak Found	High	0	8.918	4	4	5	4	877	101.2	7.47	5.8	4	0	3.273	0.436761	62.23	64.6	135.4	15.28	6.63	139836	288803	292164	174447	1
470	P40994	ADP-ribosylation factor 3	High	High	Peak Found	Peak Found	High	0.001	3.387	5	1	2	1	183	20.7	9.41	4.29	1	0	3.836	0.438568	60.4	158.6	41.4	27.12	62.7	40120.7	98354.8	7384.25	10409.6	1
460	Q04599	54S ribosomal protein L1, mitochondrial	Peak Found	High	Not Found	Peak Found	High	0.006	2.657	4	1	1	1	285	31	9.96	2.26	1	0	3.909	0.445353	30.54	159.3	40.7	28.53		18029.2	45125.5		2880.19	1
1504	Q12230	Sphingolipid long chain base-responsive protein LSP1	High	High	High	High	High	0	27.709	24	7	28	6	341	38	4.7	67.6	7	0	0.653	0.445353	67.99	91.6	108.4	7.11	27.26	643185	1.18258e+06	616035	494854	1
1516	P14120	60S ribosomal protein L30	High	High	High	High	High	0	12.777	28	2	13	2	105	11.4	9.8	32	2	0	0.655	0.449545	63.06	90.2	109.8	21.59	54.26	611555	1.38314e+06	1.21773e+06	294891	1
279	P38131	Probable mannosyltransferase KTR4	High	High	High	Peak Found	High	0	15.113	17	5	9	5	464	54.5	4.84	16.73	5	0	3.24	0.449698	58.99	185.7	14.3	9.83	19.41	328052	474489	25383.5	10469.2	1
466	P40032	Prolyl 3,4-dihydroxylase TPA1	Peak Found	High	Peak Found	Not Found	High	0.008	2.392	1	1	1	1	644	74	5.39	0	1	0	3.848	0.45326	94.95	158.7	41.3	76.27		9912.58	55065.6	4408.74		1
471	P32485	Mitogen-activated protein kinase HOG1	Peak Found	High	Peak Found	Peak Found	High	0	4.8	6	2	2	1	435	48.8	5.55	4.05	2	0	3.825	0.45326	22.96	158.6	41.4	24.81	19.67	27554.6	65299.1	9261.85	3805.56	1
578	P02406	60S ribosomal protein L28	High	High	High	High	High	0	38.482	28	5	49	5	149	16.7	10.62	141.58	5	0	3.263	0.45326	103.87	150.4	49.6	10.21	11.18	2.46537e+07	3.54692e+07	6.53831e+06	4.16448e+06	1
1542	P53163	54S ribosomal protein L12, mitochondrial	High	High	High	Peak Found	High	0	9.369	21	3	3	3	194	20.6	9.19	5.95	3	0	0.543	0.45326	62.82	87.4	112.6	5.17	1.7	114137	176360	131184	73055.5	1
492	P43593	Ubiquitin carboxyl-terminal hydrolase 6	Peak Found	High	Not Found	Peak Found	Medium	0.019	2.12	2	1	1	1	499	57.1	7.14	2.53	1	0	3.651	0.458217	5.27	157	43	5.02		51033.9	79026.6		6865.95	1
482	Q3E776	Uncharacterized protein YBR255C-A	High	High	Not Found	Peak Found	High	0.003	2.971	11	1	3	1	120	13.7	9.55	4.61	1	0	3.745	0.460685	23.43	157.9	42.1	22.07		58869.9	71447.9		6835.56	1
1643	P53851	Protein TEX1	Peak Found	Peak Found	High	Peak Found	Medium	0.024	1.963	3	1	1	1	422	47.1	8.66	0	1	0	0.483	0.460999	31.98	65.2	134.8	22.03	34.61	3597.08	8187.12	6350.55	5689.44	1
1659	P06787	Calmodulin	Peak Found	Peak Found	High	Peak Found	High	0	13.528	27	3	3	3	147	16.1	4.3	9.14	3	0	0.49	0.461915	72.64	59.6	140.4	43.84	105.97	39881.1	125879	319952	24926.9	1
1260	Q04373	Pumilio homology domain family member 6	High	High	High	High	High	0	19.093	10	6	14	6	656	75.1	6.89	26.38	6	0	0.666	0.463116	78.29	110.9	89.1	22.88	32.4	483880	1.115e+06	339023	293854	1
1446	P38431	Eukaryotic translation initiation factor 5	High	High	High	High	High	0	27.059	28	9	16	9	405	45.2	5.06	31.33	9	0	0.665	0.463116	51.15	97.3	102.7	14.41	5.69	458470	935195	522395	262024	1
1614	P38244	Vacuolar membrane protease	High	High	High	High	High	0	7.167	2	2	5	2	976	111	6.54	9.62	2	0	0.576	0.463116	23.85	72.6	127.4	15.41	27.6	109509	226599	164878	133094	1
1093	P16622	Ferrochelatase, mitochondrial	High	High	High	Peak Found	High	0	16.125	14	4	7	4	393	44.6	9.03	18.86	4	0	0.667	0.464935	120.5	121.3	78.7	14.63	37.3	456530	616652	327285	103657	1
1632	P06182	Holocytochrome-c synthase	Peak Found	Peak Found	High	High	High	0	4.213	3	1	2	1	269	30.1	5.5	2.06	1	0	0.525	0.465812	168.37	68.9	131.1	132.65	99.07	2373.92	123374	9932.45	30659.5	1
382	Q06538	Calcium permeable stress-gated cation channel 1	High	High	Peak Found	Peak Found	High	0	6.576	2	2	5	2	782	89.3	8.12	10.71	2	0	3.405	0.46694	4.84	166.7	33.3	5.95	4.72	227904	412192	43056.2	25023.4	1
440	P10659	S-adenosylmethionine synthase 1	High	High	High	High	High	0	42.138	31	10	46	4	382	41.8	5.22	114.72	10	0	3.206	0.46694	76.72	160.6	39.4	44.94	45.82	1.61627e+06	1.39124e+06	374232	103867	1
507	P40482	Protein transport protein SEC24	High	High	Not Found	Peak Found	High	0	7.655	3	2	3	2	926	103.6	6.23	9.3	2	0	3.529	0.46694	27.68	155.8	44.2	25.96		46178.6	111294		8019.48	1
1621	Q05775	Eukaryotic translation initiation factor 3 subunit J	Peak Found	High	High	High	High	0	7.274	10	2	5	2	265	29.5	5.16	12.5	2	0	0.589	0.467575	32.78	71	129	33.71	11.94	103290	279211	244051	112019	1
371	P10664	60S ribosomal protein L4-A	High	High	High	High	High	0	146.49	53	17	195	17	362	39.1	10.64	556.16	17	0	3.199	0.468232	101.5	167.5	32.5	7.1	25.37	6.46367e+07	9.71851e+07	9.32452e+06	7.28536e+06	1
604	P05756	40S ribosomal protein S13	High	High	High	High	High	0	55.092	60	11	124	11	151	17	10.43	277.31	11	0	3.2	0.468232	121.33	148	52	3.34	2.14	8.57734e+07	1.36027e+08	2.79839e+07	1.47603e+07	1
1596	P53146	Protein transport protein USE1	High	Peak Found	Peak Found	High	High	0	4.612	9	2	2	2	245	28.1	5.3	2.25	2	0	0.505	0.470122	98.77	77.1	122.9	90.21	32.08	178874	65751	99581.4	85897.7	1
1509	Q04080	GPI transamidase component GPI17	Peak Found	High	High	Peak Found	High	0	20.168	11	5	12	5	534	60.8	4.83	24.71	5	0	0.649	0.471157	130.01	91.1	108.9	16.59	88.52	190461	400804	500274	62568.5	1
484	P36057	Signal recognition particle receptor subunit beta	High	High	High	High	High	0.002	2.997	7	1	4	1	244	27	7.8	6.83	1	0	3.741	0.471478	33.84	157.8	42.2	23.64	36.89	172703	204886	27952.8	25923	1
653	P0C2H6	60S ribosomal protein L27-A	High	High	High	High	High	0	42.813	43	7	84	7	136	15.5	10.36	182.71	7	0	3.185	0.471478	90.29	144	56	13.33	35.6	7.22413e+07	9.94125e+07	1.8491e+07	1.68149e+07	1
515	P23501	Dihydrosphingosine 1-phosphate phosphatase YSR3	Not Found	High	Not Found	Peak Found	High	0.001	3.39	2	1	1	1	404	46.5	7.66	2.2	1	0	3.451	0.476611	0	155.1	44.9				290979		25813.9	1
410	P23254	Transketolase 1	High	High	Peak Found	Peak Found	High	0	4.24	4	2	3	2	680	73.8	7.01	6.13	2	0	3.542	0.476756	45.17	163	37	71.5	17.31	91090	49730.7	9805.11	6817.58	1
1668	P40413	T-complex protein 1 subunit epsilon	High	High	High	High	High	0	41.595	21	11	33	11	562	61.9	5.53	67.34	11	0	0.679	0.481389	108.83	57.1	142.9	22.06	28.03	1.15166e+06	1.3979e+06	1.88538e+06	1.53158e+06	1
929	P28007	H/ACA ribonucleoprotein complex subunit GAR1	High	High	High	Peak Found	High	0	14.163	16	4	10	4	205	21.5	11.46	17.71	4	0	0.688	0.482246	67.01	129.5	70.5	8.62	66.29	419014	787051	136424	205030	1
1631	Q03761	Transcription initiation factor TFIID subunit 12	High	Peak Found	Peak Found	Peak Found	Medium	0.022	2.05	2	1	1	1	539	61	9.55	0	1	0	0.527	0.482501	61.22	69.1	130.9	20.31	60.9	16402.5	20420.1	15894.4	21711.4	1
513	P32264	Glutamate 5-kinase	High	High	Peak Found	Peak Found	High	0.004	2.908	2	1	2	1	428	47.1	6.76	2.25	1	0	3.465	0.48286	71.53	155.2	44.8	8.91	64.64	55019.6	103770	9665.38	14101.8	1
556	P31116	Homoserine dehydrogenase	High	High	Peak Found	Peak Found	High	0	15.626	16	4	7	4	359	38.5	7.44	16.76	4	0	0.68	0.48286	71.47	152.1	47.9	10.07	1.62	373816	716791	117121	65147.5	1
1478	Q03497	Serine/threonine-protein kinase STE20	Peak Found	High	Peak Found	High	High	0	7.733	5	3	3	3	939	102.3	7.33	2.3	3	0	0.481	0.48286	106.16	94.4	105.6	17.75	53.68	54890	117447	97223.7	23768.7	1
1532	P41543	Dolichyl-diphosphooligosaccharide--protein glycosyltransferase subunit 1	High	High	Peak Found	High	High	0	13.737	13	4	7	4	476	54	5.12	15.59	4	0	0.682	0.484629	38.91	88.6	111.4	14.32	44.53	474472	966539	446061	465363	1
1534	P25367	(PIN+) prion protein RNQ1	High	High	High	Not Found	High	0	13.919	18	4	6	4	405	42.6	6.64	17.86	4	0	0.663	0.486156	27.59	88.3	111.7	37.24		267529	259374	242049		1	Acetyl [N-Term]
1640	Q03327	Mitochondrial fusion and transport protein UGO1	Peak Found	High	Peak Found	Peak Found	Medium	0.031	1.832	1	1	1	1	502	57.5	6.81	0	1	0	0.507	0.486156	58.85	67.3	132.7	11.01	55.77	14883.7	28921.4	19570.1	24494.4	1
1619	P02992	Elongation factor Tu, mitochondrial	High	High	High	High	High	0	24.908	15	5	25	5	437	47.9	6.65	52.28	5	0	3.133	0.488507	104.72	71.1	128.9	15.46	56.94	577973	771567	574125	732886	1
489	Q06488	Chromatin structure-remodeling complex subunit RSC2	Peak Found	High	Not Found	Peak Found	High	0.008	2.395	1	1	1	1	889	102.2	8.91	2.04	1	0	3.694	0.48938	11.43	157.4	42.6	10.87		17671.2	34270.1		2629.72	1
499	P38837	Protein NSG1	High	Peak Found	Peak Found	Peak Found	Medium	0.019	2.134	3	1	1	1	291	32.2	8.78	2.17	1	0	3.619	0.48938	20.99	156.7	43.3	8.63	21.05	110438	207478	26140.9	19181.1	1
1580	Q04602	Vacuolar basic amino acid transporter 4	Peak Found	Peak Found	High	High	High	0	4.52	4	2	3	2	768	85.6	8.28	4.28	2	0	0.51	0.48938	14.72	80.3	119.7	5.55	48.7	33667.5	51743.6	64663.6	17143.3	1
568	P38712	ATP-dependent rRNA helicase RRP3	High	High	Peak Found	Peak Found	High	0	10.1	7	3	7	3	501	55.9	9.16	13.06	3	0	0.65	0.490787	30.19	151.4	48.6	6.67	32.18	257082	469750	64293.6	55542.8	1
352	Q03648	Uncharacterized protein YMR209C	High	High	Peak Found	Peak Found	High	0	5.779	7	3	3	3	457	52.2	7.58	5.89	3	0	3.604	0.491474	41.45	169.6	30.4	2.68	39.48	141758	244799	18175.2	17534.2	1
1641	P53303	Zinc finger protein ZPR1	High	Peak Found	Peak Found	Peak Found	Medium	0.031	1.83	3	1	1	1	486	55	4.86	0	1	0	0.505	0.491474	33.5	67.1	132.9	31.5	38.56	21806.5	23044.5	24385	23195.1	1
1638	Q01163	37S ribosomal protein S23, mitochondrial	Peak Found	High	Peak Found	Peak Found	Medium	0.019	2.132	2	1	1	1	450	50.8	9.73	2.26	1	0	0.516	0.4947	36.15	68.1	131.9	19.19	38.07	38985.3	49324.6	46787.9	44172	1
1269	P38910	10 kDa heat shock protein, mitochondrial	High	High	High	Peak Found	High	0	7.196	25	2	4	2	106	11.4	9	10.24	2	0	0.502	0.500071	102.41	110.5	89.5	16.63	126.19	57653.8	121398	206250	6380.3	1
521	P22804	Protein transport protein BET1	High	High	High	High	High	0	7.969	20	2	6	2	142	15.7	8.47	19.17	2	0	2.958	0.5004	22.48	154.6	45.4	1.69	21.71	345772	588756	82419.9	61059.1	1
794	P16521	Elongation factor 3A	High	High	High	High	High	0	168.942	37	33	188	28	1044	115.9	6.05	423.79	33	5	3.095	0.5004	98.68	137.3	62.7	5.9	28.14	3.18528e+07	5.75711e+07	1.16151e+07	9.45131e+06	1
518	Q07534	Mitochondrial glycine transporter	High	High	Peak Found	Not Found	High	0.006	2.689	5	1	2	1	307	34.2	9.92	4.65	1	0	3.419	0.510071	17.24	154.7	45.3	16.34		39715.3	52351.1	9685.03		1
587	Q04991	Protein FMP42	High	High	High	High	High	0	12.814	7	3	6	3	504	56.1	7.08	13.52	3	0	2.923	0.510071	100.06	149.4	50.6	4.75	36.76	338583	602055	85065.9	78725.9	1
634	P22211	Nitrogen permease reactivator protein	High	High	High	High	High	0	8.692	5	3	5	3	790	85.9	8.37	7.25	3	0	0.534	0.510071	180.19	145.6	54.4	24.57	86.55	107351	253522	21968.9	49615.5	1
1241	P38264	SRP-independent targeting protein 3	High	High	High	High	High	0	49.481	41	7	38	7	188	21.1	9.19	89.46	7	0	0.698	0.510071	135.81	112	88	5.52	22.25	2.13648e+06	3.84037e+06	1.39376e+06	1.0407e+06	1
1295	P40345	Phospholipid:diacylglycerol acyltransferase	High	High	High	High	High	0	17.444	7	5	10	5	661	75.3	6.68	20.74	5	0	0.686	0.510071	41.56	109.1	90.9	3.26	37.85	281803	447401	163374	153737	1
1462	P53691	Peptidyl-prolyl cis-trans isomerase CPR6	High	High	Peak Found	Peak Found	High	0	9.31	10	3	5	3	371	42	6.16	11.28	3	0	0.707	0.510962	82.51	95.5	104.5	17.98	53.18	425317	547623	258115	309456	1
1623	P89105	RNA polymerase-associated protein CTR9	Not Found	Peak Found	High	Peak Found	High	0.001	3.426	1	1	1	1	1077	124.6	6.3	2.26	1	0	0.546	0.510962	67.93	70.7	129.3		58.91		14558.1	23383.2	5235.91	1
434	Q12743	DER1-like family member protein 1	High	High	High	High	High	0	14.233	18	4	11	4	341	38.1	9.58	21.75	4	0	2.975	0.511299	50.22	160.8	39.2	2.99	65.1	317598	506176	43208.9	63565.3	1
586	P53224	Protein ORM1	High	High	Peak Found	High	High	0	6.17	13	2	8	2	222	25.2	6.64	12.5	2	0	2.88	0.511299	71.21	149.5	50.5	11.67	65.52	379655	744686	78936.1	117006	1
1404	P22203	V-type proton ATPase subunit E	High	High	High	High	High	0	26.868	41	9	23	9	233	26.5	5.36	41.75	9	0	0.701	0.511299	80.87	101	99	8.73	4.84	790287	1.48682e+06	744951	433690	1
1482	Q06493	LETM1 domain-containing protein YLH47, mitochondrial	High	Peak Found	High	High	High	0	6.618	7	3	4	3	454	52.1	9.33	5.86	3	0	0.672	0.511299	65.75	93.7	106.3	1.3	54.01	203173	344029	145528	176871	1
496	P07285	Anthranilate phosphoribosyltransferase	High	High	High	Peak Found	High	0.006	2.679	2	1	3	1	380	41.3	6.67	5.75	1	0	3.628	0.514417	43.64	156.8	43.2	27.9	47.84	85977	213193	38534.6	10358.4	1
610	P32324	Elongation factor 2	High	High	High	High	High	0	117.276	33	25	118	25	842	93.2	6.32	263.5	25	0	3.049	0.516238	85.75	147.3	52.7	9.25	35.62	2.07166e+07	3.02132e+07	5.0202e+06	4.56649e+06	1
709	P05744	60S ribosomal protein L33-A	High	High	High	Not Found	High	0	35.562	46	6	39	2	107	12.1	11.08	111.28	6	4	3.04	0.519642	101.71	141.4	58.6	1.4	40.03	1.44911e+07	2.36192e+07	4.15856e+06	4.04588e+06	1
512	Q12374	Nuclear control of ATPase protein 2	Not Found	High	Peak Found	Not Found	Medium	0.02	2.11	1	1	1	1	616	70.8	6.89	2.02	1	0	3.484	0.522108	0	155.4	44.6				42098.6	6805.56		1
528	P38884	Altered inheritance of mitochondria protein 18, mitochondrial	Peak Found	High	Not Found	Peak Found	High	0.001	3.095	3	1	1	1	321	36.5	9.06	1.89	1	0	3.318	0.522319	18.61	153.7	46.3	17.62		45911	59418.5		6213.65	1
474	P39524	Probable phospholipid-transporting ATPase DRS2	High	High	High	Peak Found	High	0	14.503	4	3	6	3	1355	153.7	5.48	17.49	3	0	3.191	0.523055	48.27	158.3	41.7	12.95	34.57	254393	351964	44607.4	39938.6	1
500	Q02725	Vacuolar transporter chaperone 3	High	High	Peak Found	High	High	0	29.011	9	7	14	6	835	96.5	7.42	28.63	7	0	2.834	0.523055	46.65	156.7	43.3	7.15	54.98	419632	771929	75857.2	93701.8	1
1531	P32486	Beta-glucan synthesis-associated protein KRE6	High	High	High	High	High	0	39.516	20	9	28	8	720	80.1	4.69	61.27	9	1	0.71	0.526616	66.85	88.7	111.3	17.53	6.19	1.1816e+06	2.52019e+06	1.64211e+06	817868	1
1625	P36135	Probable secreted beta-glucosidase UTH1	Peak Found	Peak Found	Peak Found	High	Medium	0.029	1.863	3	1	1	1	365	36.9	4.79	2.11	1	0	0.545	0.526905	43.52	70.5	129.5	2.12	40.38	22754.3	36713.4	28725.9	28099.7	1
292	P38879	Nascent polypeptide-associated complex subunit alpha	High	High	Peak Found	Peak Found	High	0	9.206	16	2	5	2	174	18.7	4.94	10.94	2	0	3.251	0.528046	54.46	182.1	17.9	28.37	54.75	294891	326410	14682.2	18065.8	1
506	P47130	Cop9 signalosome complex subunit 12	Peak Found	High	Peak Found	Not Found	High	0.003	2.921	3	1	1	1	423	49.5	9.17	2.69	1	0	3.573	0.534431	38.32	156.3	43.7	35.39		12138	33650.3	4107.61		1
1563	P09734	Tubulin alpha-3 chain	High	High	High	Peak Found	High	0	24.285	14	5	20	2	445	49.7	5.16	50.45	5	0	0.702	0.534568	33.71	82.8	117.2	28.53	26.21	184171	460979	248359	196440	1
1568	P40207	Ergosterol biosynthesis protein 29	Peak Found	High	High	Peak Found	High	0	4.672	9	2	2	2	237	27.9	5.44	4.49	2	0	0.568	0.535582	74.98	82.4	117.6	41.47	7.73	58963.4	179368	100839	61156.5	1
562	P53120	Uncharacterized membrane protein YGL140C	High	High	Peak Found	Peak Found	High	0	6.966	2	2	3	2	1219	137.4	8.12	4.61	2	0	3.442	0.536091	94.62	151.9	48.1	0.95	43.31	82032.9	134553	17585.9	18000.2	1
632	P38767	Ethionine resistance-conferring protein 1	High	High	High	High	High	0	9.329	7	3	6	3	581	64.2	6.14	7.94	3	0	2.895	0.536091	58.36	145.8	54.2	11.1	46.95	280396	545576	74749.9	81023.3	1
1560	P32471	Elongation factor 1-beta	High	High	High	Peak Found	High	0.001	3.674	5	1	3	1	206	22.6	4.45	4.29	1	0	0.718	0.536091	24.72	83.6	116.4	20.41	26.77	491851	1.0935e+06	612383	488395	1
1620	P40483	Putative zinc metalloproteinase YIL108W	Peak Found	High	Not Found	Peak Found	Medium	0.019	2.152	2	1	1	1	696	77.4	7.5	2.12	1	0	0.552	0.536091	4.6	71.1	128.9	4.39		25069.9	44350		23866.4	1
1635	P53943	Probable transporter AQR1	Peak Found	High	Peak Found	Not Found	Medium	0.017	2.167	2	1	1	1	586	65.3	8.81	2.05	1	0	0.52	0.536091	47.07	68.4	131.6	42.8		30842.9	95780.3	75880.4		1
539	Q07376	Probable transporter MCH1	High	Not Found	Peak Found	Peak Found	High	0.001	3.184	3	1	1	1	486	53.5	9.01	2.16	1	0	3.254	0.541565	65.13	153	47		56.88	45901.6		8623.86	10996.8	1
650	P18239	ADP,ATP carrier protein 2	High	High	High	High	High	0	49.507	32	12	50	7	318	34.4	9.79	108.22	12	6	2.97	0.543789	94.46	144.2	55.8	9.36	5.2	6.28767e+06	9.15565e+06	2.20906e+06	1.1158e+06	1
1452	P48836	V-type proton ATPase subunit G	High	High	High	High	High	0	6.512	21	2	6	2	114	12.7	8.98	14.64	2	0	0.697	0.543789	208.07	96.5	103.5	3.76	17.43	223061	391129	203394	141663	1
1624	Q12035	rRNA-processing protein FCF2	Peak Found	High	Peak Found	Peak Found	High	0.006	2.658	4	1	1	1	217	25.6	9.5	2.26	1	0	0.547	0.543789	21.28	70.7	129.3	18.14	22.8	53183.4	114439	87975.6	66207.5	1
1441	P09624	Dihydrolipoyl dehydrogenase, mitochondrial	High	High	High	High	High	0	23.574	16	8	18	8	499	54	8.03	35.26	8	0	0.723	0.544117	73.39	97.6	102.4	16.84	50.01	435392	919515	333381	379570	1
1340	P07284	Serine--tRNA ligase, cytoplasmic	High	High	High	High	High	0	26.687	24	8	14	8	462	53.3	6.09	32.65	8	0	0.721	0.54449	127.94	106	94	23.18	13.3	448105	535174	346327	155897	1
348	Q07830	GPI ethanolamine phosphate transferase 3	High	High	Peak Found	Peak Found	High	0	9.707	4	3	4	3	1017	115.6	6.64	9.53	3	0	3.261	0.545312	93.9	170.2	29.8	0.08	84.92	205835	342603	16899	36803.4	1
524	P14906	Protein translocation protein SEC63	High	High	High	High	High	0	53.926	28	14	42	14	663	75.3	5.27	88.03	14	0	2.959	0.546331	88.11	153.9	46.1	5.92	38.2	3.12377e+06	5.64733e+06	691840	654510	1
1626	P53093	Protein YIP4	Peak Found	High	High	Peak Found	High	0	4.476	5	1	2	1	235	26	7.01	5.23	1	0	0.542	0.547771	64.74	70.3	129.7	75.3	49.44	10687.8	58235	48151.5	12616.1	1
1618	P53309	Clathrin coat assembly protein AP180B	Peak Found	High	Peak Found	Peak Found	Medium	0.03	1.846	2	1	1	1	568	64.3	6.77	2.06	1	0	0.557	0.553684	38.37	71.5	128.5	0.07	35.45	26629.8	44227.6	34654.1	31444.3	1
1125	P33322	H/ACA ribonucleoprotein complex subunit CBF5	High	High	High	Peak Found	High	0	16.005	14	5	10	5	483	54.7	8.9	23.02	5	0	0.732	0.554449	106.35	119.3	80.7	18.92	47.45	391511	851985	200091	218615	1
557	P50087	MICOS subunit MIC26	High	High	Peak Found	Peak Found	High	0	4.509	12	2	2	2	233	26.9	9.26	4.05	2	0	3.174	0.555607	118.77	152.1	47.9	12.72	93.23	49998.8	99551.3	35619.1	3976.83	1
652	P39533	Homocitrate dehydratase, mitochondrial	High	High	Peak Found	Peak Found	High	0	10.855	6	4	6	4	789	86.5	6.96	10.9	4	0	0.632	0.555607	55.38	144.1	55.9	25.16	57.51	161677	385149	45599.5	58773.1	1
519	P39976	D-2-hydroxyglutarate--pyruvate transhydrogenase DLD3	High	High	High	Peak Found	High	0	11.496	7	3	7	3	496	55.2	6.89	14.32	3	0	2.823	0.558582	55.78	154.7	45.3	11.17	50.82	309813	603419	63151.1	72841.2	1
1557	P15496	Isopentenyl-diphosphate delta-isomerase	Peak Found	High	Peak Found	Peak Found	High	0.001	3.29	5	1	1	1	288	33.3	4.98	2.51	1	0	0.732	0.558582	57.86	84.5	115.5	55.79	13.42	276505	1.05862e+06	590506	265365	1
525	P38152	Tricarboxylate transport protein	High	High	Peak Found	Peak Found	High	0	5.547	6	2	3	2	299	32.2	9.57	4.11	2	0	3.19	0.558626	91.59	153.8	46.2	18.93	55.67	147990	322065	31369.4	39197	1
1616	Q06132	Suppressor of glycerol defect protein 1	Peak Found	High	Peak Found	Peak Found	High	0.008	2.392	1	1	1	1	899	102.8	5.99	2.02	1	0	0.566	0.558626	137.45	72.3	127.7	42.27	110.84	9324.03	28717.8	60334.6	3976.82	1
1617	P39715	Shuttling pre-60S factor ECM1	Peak Found	High	High	Peak Found	Medium	0.021	2.072	4	1	2	1	212	23.9	9.7	1.71	1	0	0.56	0.558626	3.5	71.8	128.2	3.37	1.22	22180.3	35160.6	36503.5	19503.8	1
1442	P53131	Pre-mRNA-splicing factor ATP-dependent RNA helicase PRP43	High	High	High	High	High	0	23.304	14	8	13	8	767	87.5	6.42	29.65	8	0	0.728	0.558935	82.04	97.6	102.4	8.58	29.63	282475	530255	238332	198246	1
1556	P32854	Syntaxin PEP12	High	High	Peak Found	High	High	0	5.661	7	2	5	2	288	33	4.92	8.39	2	0	0.734	0.558935	48.25	84.9	115.1	36.03	47.34	1.625e+06	1.60442e+06	1.12137e+06	1.2231e+06	1
1666	P54867	Protein SLG1	High	High	High	High	High	0	8.386	7	2	5	2	378	39.2	4.81	13.34	2	0	0.578	0.558935	17.76	57.5	142.5	60.7	25.57	40842	170018	124945	97911.2	1
295	P39719	Flavin carrier protein 2	High	High	Peak Found	Peak Found	High	0	8.22	3	3	4	3	783	87.4	7.94	5.13	3	0	0.639	0.559958	39.24	181.1	18.9	29.12	40.44	169306	427471	15175.1	14856.3	1
670	P0CX38	40S ribosomal protein S6-B	High	High	High	High	High	0	81.496	39	12	115	12	236	27	10.45	305.47	12	0	2.916	0.559958	83.15	143.2	56.8	2.99	40.83	4.92217e+07	7.84399e+07	1.32797e+07	1.30803e+07	1
550	P33421	Succinate dehydrogenase	High	High	Peak Found	Peak Found	High	0	7.061	7	2	2	2	198	22.1	10.23	5.43	2	0	2.752	0.560026	66.65	152.2	47.8	5.98	61.07	375510	679474	72527.6	99370.6	1
1242	P40857	Very-long-chain (3R)-3-hydroxyacyl-CoA dehydratase PHS1	High	High	High	High	High	0	6.217	11	2	4	2	217	24.5	9.96	9.31	2	0	0.648	0.560791	198.65	112	88	75.66	0.89	92384.1	507022	124233	66695.9	1
299	P0CX26	60S ribosomal protein L43-B	High	High	High	High	High	0	15.936	42	5	33	5	92	10.1	10.42	60.96	5	0	2.9	0.567937	120.38	180	20	0.36	40.31	2.62373e+06	4.33972e+06	203275	198620	1
737	P08466	Mitochondrial nuclease	High	High	High	High	High	0	16.674	19	6	13	6	329	37.2	8.78	20.47	6	0	2.897	0.569017	53.52	139.7	60.3	12.92	13.44	789111	1.09224e+06	264285	173846	1
400	P89102	Exocyst complex component SEC5	High	High	Not Found	Peak Found	High	0	8.819	3	2	4	2	971	112.1	5.85	6.86	2	0	3.093	0.573782	35.56	164.6	35.4	25.23		32433.9	77336.4		4247.68	1
449	P32335	Protein MSS51, mitochondrial	High	High	Peak Found	Peak Found	High	0	6.052	4	2	4	2	436	50.8	8.73	6	2	0	2.732	0.574179	37.63	159.9	40.1	20.65	73.09	342759	764749	52555	89691.9	1
456	P25573	Mitochondrial inner membrane i-AAA protease supercomplex subunit MGR1	High	High	Peak Found	Peak Found	High	0	14.116	16	5	6	5	417	47.1	9.32	14.17	5	0	2.758	0.574179	39.68	159.4	40.6	24.68	51.66	430000	502456	58617	68540.7	1
1466	P32901	Peptide transporter PTR2	High	High	High	High	High	0	14.516	7	4	11	4	601	68	5.39	24.85	4	0	0.753	0.574179	75.76	95.3	104.7	19.99	41.49	469608	587380	309389	307875	1
620	P37838	Nucleolar protein 4	High	High	High	Peak Found	High	0	12.947	8	5	10	5	685	77.8	9.06	21.99	5	0	2.716	0.576348	47.17	146.5	53.5	17.41	49.59	451247	960795	121176	137017	1
1423	P05749	60S ribosomal protein L22-A	High	High	High	Peak Found	High	0	7.004	24	2	9	2	121	13.7	6.14	10.52	2	0	0.745	0.576348	109.61	99.8	100.2	5.57	30.75	608043	1.09375e+06	476479	402977	1
339	P36148	Glycerol-3-phosphate O-acyltransferase 2	High	High	High	Not Found	High	0	7.963	6	3	6	3	743	83.6	9.48	13.49	3	0	3.149	0.57904	0.93	172.1	27.9	15.12		228570	306610	31123.9		1
1607	P36060	NADH-cytochrome b5 reductase 2	High	High	High	Peak Found	High	0	7.048	9	3	10	3	302	34.1	8.65	11.42	3	0	2.866	0.582452	129.67	75.5	124.5	6.45	63.88	4.02016e+06	7.32222e+06	3.9885e+06	5.74051e+06	1
1038	P25385	Protein transport protein BOS1	Peak Found	High	Peak Found	High	High	0	5.399	11	2	3	2	244	27.5	8.92	7.13	2	0	0.651	0.582464	42.96	124.2	75.8	4.11	42.58	156031	274924	67296.6	68109.4	1
1045	Q06631	Protein BFR2	High	High	Peak Found	Peak Found	High	0	4.491	4	2	3	2	534	61.2	4.78	3.98	2	0	0.574	0.582464	26.7	123.9	76.1	8.17	30.65	42663.8	79627.5	32385.3	11333.3	1
1246	Q99316	Protein disulfide isomerase MPD2	High	High	High	Peak Found	High	0	8.215	12	3	7	3	277	32.4	6.55	8.13	3	0	0.723	0.582464	67.2	111.7	88.3	14.53	44.19	279873	378569	135150	140265	1
414	P32558	FACT complex subunit SPT16	High	High	Peak Found	Not Found	High	0	8.853	3	2	3	2	1035	118.6	5.1	9.12	2	0	3.333	0.584797	16.2	162.5	37.5	17.29		86840.8	184598	21189.4		1
541	A5Z2X5	UPF0495 protein YPR010C-A	Peak Found	High	Peak Found	Not Found	High	0.004	2.886	22	1	1	1	72	7.9	8.73	2.9	1	0	3.242	0.584797	9.67	152.9	47.1	9.2		76514	111666	20702.8		1
384	Q05506	Arginine--tRNA ligase, cytoplasmic	High	High	Peak Found	Peak Found	High	0	18.729	12	7	8	7	607	69.5	6.79	18.14	7	0	2.905	0.586033	92.09	166.6	33.4	16.94	30.45	243567	515122	64272.2	22561.3	1
533	P40085	Endoplasmic reticulum membrane protein 65	Peak Found	High	Peak Found	Peak Found	Medium	0.035	1.727	2	1	1	1	556	64.8	9.77	0	1	0	3.295	0.586033	78.95	153.4	46.6	16.17	72.52	15460.6	32339.5	2796.67	4720.62	1
535	P33339	Transcription factor tau 131 kDa subunit	High	High	Peak Found	Peak Found	High	0.006	2.696	2	1	2	1	1025	120.2	5.26	2.46	1	0	3.272	0.586033	116.33	153.2	46.8	5.46	89.38	16947.2	30439.9	2393.5	5770.67	1
547	P05694	5-methyltetrahydropteroyltriglutamate--homocysteine methyltransferase	High	High	High	High	High	0	37.702	17	10	21	10	767	85.8	6.47	53.21	10	0	2.845	0.586033	38.97	152.3	47.7	10.6	10.1	1.36494e+06	1.9529e+06	345311	216607	1
660	P41940	Mannose-1-phosphate guanyltransferase	High	High	High	High	High	0	91.935	51	17	102	17	361	39.5	6.34	264.86	17	0	2.836	0.586033	118.02	143.7	56.3	10.03	5.77	1.56842e+07	2.26217e+07	5.57785e+06	2.7947e+06	1
1252	P69771	Vacuolar protein-sorting-associated protein 46	Peak Found	High	Peak Found	High	High	0	4.827	12	2	2	2	204	23.1	6.87	2.5	2	0	0.57	0.586033	48.7	111.2	88.8	51.11	34.07	18529.9	65679.3	15829.9	14068.3	1
1422	P12904	5'-AMP-activated protein kinase subunit gamma	Not Found	High	High	Peak Found	High	0	6.491	7	2	2	2	322	36.4	5.78	4.61	2	0	0.591	0.586033	100.73	99.9	100.1		38.35		141613	60515.9	57377.4	1
1565	P53834	Hsp90 co-chaperone HCH1	High	High	Peak Found	Peak Found	High	0	6.693	22	2	4	2	153	17.2	4.78	6.82	2	0	0.658	0.586033	48.39	82.6	117.4	27.44	50.91	160268	179846	120253	138911	1
1600	P25618	Protein CWH43	High	High	High	High	High	0	7.006	2	2	5	2	953	107.8	6.25	8.56	2	0	0.75	0.586033	93.9	77	123	50.86	63.96	336880	263792	212459	306247	1
340	P10614	Lanosterol 14-alpha demethylase CYP51	High	High	High	High	High	0	57.33	28	11	61	11	530	60.7	8.66	142.3	11	0	2.822	0.586249	126.23	171.9	28.1	14.33	0.82	1.03589e+07	1.40532e+07	1.43856e+06	773005	1
566	P38219	Obg-like ATPase 1	High	High	High	High	High	0	56.816	51	16	55	16	394	44.1	7.43	128.09	16	0	2.816	0.58918	111.82	151.5	48.5	11.27	12.42	8.60565e+06	1.21956e+07	2.17777e+06	1.41191e+06	1
1489	P38129	Transcription initiation factor TFIID subunit 5	High	High	Peak Found	Peak Found	High	0	11.266	4	3	5	3	798	88.9	7.4	13.77	3	0	0.629	0.590006	50.91	93.2	106.8	5.96	16.26	106961	193469	106645	73042.2	1
1538	P40533	Protein TED1	High	High	High	High	High	0	17.783	10	6	13	6	473	54.9	5.73	23.52	6	0	0.762	0.590006	49.92	87.7	112.3	9	43.17	464840	877900	433526	442805	1
1605	P25046	Mediator of RNA polymerase II transcription subunit 19	Peak Found	High	Peak Found	Peak Found	Medium	0.039	1.706	3	1	1	1	220	24.8	6.35	0	1	0	0.612	0.590306	47.52	75.9	124.1	5.87	44.82	13706.8	24760.9	15740.4	16496.8	1
1651	P47083	U3 small nucleolar RNA-associated protein MPP10	Not Found	Peak Found	High	High	High	0	7.311	4	2	3	2	593	66.9	4.65	7.1	2	0	0.582	0.594138	34.66	63.5	136.5		1.13		62902.3	75505.2	41711.2	1
486	P09440	C-1-tetrahydrofolate synthase, mitochondrial	High	High	High	Peak Found	High	0	9.188	5	4	6	4	975	106.2	8.66	13.83	4	0	3.217	0.601275	25.58	157.6	42.4	42.66	61.79	77402.8	239863	42505.3	9054.42	1
529	P29496	Minichromosome maintenance protein 5	High	High	Peak Found	Peak Found	High	0	14.372	7	6	8	6	775	86.4	5.71	16.62	6	0	2.747	0.601275	69.32	153.6	46.4	21.47	18.69	246599	556717	71197.4	50496.7	1
563	P38627	CTP synthase 2	High	High	Peak Found	Peak Found	High	0.006	2.543	2	1	2	1	578	64.5	5.64	4.15	1	0	3.158	0.601275	41	151.9	48.1	0.76	37.89	33383.7	56100.8	7561.76	7119.38	1
698	P05755	40S ribosomal protein S9-B	High	High	High	High	High	0	29.764	39	9	52	9	195	22.3	10.1	102.15	9	0	2.783	0.601275	133.93	141.8	58.2	29.37	39.1	2.29781e+07	5.82246e+07	8.21254e+06	7.87714e+06	1
702	Q04697	Glucose-signaling factor 2	High	High	High	High	High	0	33.774	24	8	24	8	403	45.8	7.12	58.3	8	0	2.783	0.601275	84.06	141.7	58.3	5.53	49.52	2.65368e+06	4.77088e+06	737365	832887	1
1453	P33299	26S proteasome regulatory subunit 7 homolog	High	High	High	High	High	0	25.292	20	9	28	8	467	52	5.47	49.14	9	0	0.769	0.601275	53.59	96.3	103.7	11.89	27.36	1.06379e+06	2.09334e+06	958709	771168	1
1546	P25586	KRR1 small subunit processome component	Peak Found	Peak Found	High	High	High	0	4.664	7	2	3	2	316	37.1	9.39	3.98	2	0	0.629	0.601275	104.8	86.9	113.1	4.59	20.09	108035	168312	110354	79863.5	1
1636	P38333	Essential nuclear protein 1	Peak Found	High	High	High	High	0	9.177	10	3	6	3	483	55.1	4.94	4.98	3	0	0.622	0.601275	95.37	68.4	131.6	8.54	8.64	65319.1	122549	132975	63963.9	1
641	P38112	ATP-dependent RNA helicase MAK5	High	High	High	High	High	0	15.082	7	4	8	4	773	87	8.4	18.15	4	0	0.754	0.60359	146.06	144.9	55.1	12.71	38.77	359330	498850	88154	84120.6	1
542	P27515	Uridine kinase	High	High	Peak Found	Peak Found	High	0	4.617	2	1	2	1	501	56.3	7.71	6.27	1	0	3.237	0.609487	45.98	152.8	47.2	20.41	47.74	88031.2	195731	20720.5	22744.6	1
1597	P20435	DNA-directed RNA polymerases I, II, and III subunit RPABC2	High	High	High	High	High	0	5.588	12	1	4	1	155	17.9	4.63	11.24	1	0	0.628	0.609487	20.88	77.1	122.9	11.2	21.32	82486.3	117005	97599	71894.9	1
274	P17695	Glutaredoxin-2	High	High	High	Not Found	High	0	5.917	17	2	3	2	143	15.9	7.28	5.83	2	0	3.113	0.614366	1.69	187.1	12.9	9.96		91030.1	174263	6286.06		1
593	P53285	Vacuolar protein sorting-associated protein 62	Peak Found	High	Peak Found	Peak Found	High	0.001	3.382	4	1	1	1	467	54.5	8.12	3.04	1	0	2.923	0.614366	4.83	149	51	4.74	4.15	35847.9	63733.8	11530.8	6647.3	1
1407	P07264	3-isopropylmalate dehydratase	High	High	High	High	High	0	38.029	15	10	26	10	779	85.7	5.9	62.84	10	0	0.779	0.614366	65.77	100.9	99.1	11.66	30.92	864915	1.21887e+06	585994	496873	1
745	P32366	V-type proton ATPase subunit d	High	High	High	High	High	0	20.58	34	7	17	7	345	39.8	4.6	34.93	7	0	2.745	0.618457	87.57	139.2	60.8	12.33	11.24	2.03301e+06	2.83767e+06	702934	448154	1
350	P40318	ERAD-associated E3 ubiquitin-protein ligase DOA10	High	High	High	Peak Found	High	0	34.78	11	9	20	9	1319	151.4	6.28	46.31	9	0	2.641	0.619262	71.87	169.9	30.1	22.33	19.31	488715	1.11717e+06	109176	45087.9	1
1610	P32328	Serine/threonine-protein kinase DBF20	High	High	Not Found	Peak Found	Medium	0.024	1.959	1	1	2	1	564	65.8	8.53	3.56	1	0	0.595	0.619472	20.75	74.6	125.4	19.6		58036.4	72999.8		43212.5	1
351	P32911	Eukaryotic translation initiation factor eIF-1	High	High	High	High	High	0	12.175	35	3	7	3	108	12.3	7.97	18.74	3	0	0.749	0.619502	29.7	169.9	30.1	14.03	31.78	318929	434524	60109.2	20686.5	1
621	P25572	Putative uncharacterized protein YCL042W	Peak Found	Peak Found	High	Peak Found	High	0.006	2.657	8	1	1	1	119	13.4	10.56	2.08	1	0	2.736	0.620315	57.38	146.5	53.5	16.72	56.51	983052	2.07261e+06	248135	314428	1
938	Q07878	Intermembrane lipid transfer protein VPS13	Peak Found	High	Not Found	Peak Found	High	0	9.686	2	3	3	3	3144	357.6	5.6	6.98	3	0	0.613	0.622012	44.56	128.7	71.3	31.45		39658.2	103641		14028.8	1
365	P25567	RNA-binding protein SRO9	High	High	Peak Found	Peak Found	High	0	12.176	14	4	7	4	434	48	8.9	15.34	4	0	0.697	0.622905	27.36	168.4	31.6	6.13	29.63	182007	277454	24767.4	20601.9	1
977	P0CX44	60S ribosomal protein L1-B	High	High	High	High	High	0	71.494	38	11	75	11	217	24.5	9.72	196.44	11	0	2.725	0.625776	137.1	127.1	72.9	5.69	37.76	3.43074e+07	5.26257e+07	1.34553e+07	1.26433e+07	1
1642	P05738	60S ribosomal protein L9-A	High	High	High	Peak Found	High	0	35.798	57	8	86	2	191	21.6	9.73	223.92	8	7	0.788	0.627429	99.98	65.6	134.4	51.04	45.66	6.05101e+06	4.72441e+06	5.68517e+06	6.0375e+06	1
320	P32449	Phospho-2-dehydro-3-deoxyheptonate aldolase, tyrosine-inhibited	High	High	High	Peak Found	High	0	33.954	33	8	28	8	370	39.7	6.95	69.26	8	0	2.715	0.629472	128.03	175.5	24.5	11.23	75.45	2.29005e+06	3.24719e+06	501671	82967.3	1
567	Q12445	Nucleoporin POM34	Peak Found	High	High	Peak Found	High	0	4.87	11	2	2	2	299	34.2	9.8	2.45	2	0	2.803	0.629472	43.19	151.5	48.5	13.93	43.22	230560	467103	55698.3	56929.9	1
1602	P32521	Actin cytoskeleton-regulatory complex protein PAN1	Peak Found	High	Not Found	Peak Found	Medium	0.031	1.827	0	1	1	1	1480	160.2	5.29	0	1	0	0.625	0.629472	3.52	76.9	123.1	3.35		9843.77	17160.8		8208.89	1
491	P14904	Vacuolar aminopeptidase 1	Peak Found	High	Peak Found	High	High	0	7.381	6	3	4	3	514	57.1	5.83	8.58	3	0	3.001	0.630413	29.81	157.3	42.7	30.15	32.01	112151	287485	28105.1	24220.8	1
316	P0CX29	40S ribosomal protein S23-A	High	High	High	High	High	0	22.389	48	5	11	5	145	16	10.73	26.07	5	0	2.708	0.632467	77.24	176.5	23.5	11.81	78.48	1.09426e+06	1.53873e+06	67196.3	127640	1
1397	P32495	H/ACA ribonucleoprotein complex subunit NHP2	High	High	High	Peak Found	High	0	11.115	19	3	7	3	156	17.1	9.72	11.77	3	0	0.792	0.632746	43.4	101.7	98.3	1.25	40.28	1.77815e+06	2.90438e+06	1191073	1163325	1
596	P10869	Aspartokinase	High	High	Peak Found	Peak Found	High	0	5.305	5	2	3	2	527	58.1	6.67	4.47	2	0	2.746	0.632784	30.12	148.6	51.4	11.85	19.44	236044	464234	72481	51959	1
508	P41911	Glycerol-3-phosphate dehydrogenase	High	High	High	High	High	0	19.838	12	4	18	3	440	49.4	7.09	50.5	4	0	2.701	0.635007	39.08	155.8	44.2	30.42	20.73	787985	2.02804e+06	301781	122117	1
1444	P27476	Nuclear localization sequence-binding protein	High	High	High	High	High	0	30.448	22	9	21	9	414	44.5	4.93	41.88	9	0	0.795	0.635566	116.9	97.5	102.5	6.17	26.13	1.06085e+06	1.61626e+06	829568	655442	1
1564	P38934	Nuclear segregation protein BFR1	High	High	High	High	High	0	16.936	19	7	11	7	470	54.6	9.19	20.47	7	0	0.776	0.635566	109.61	82.8	117.2	4.43	4.57	227604	355425	301877	153845	1
753	P32386	ATP-dependent bile acid permease	High	High	High	High	High	0	60.264	10	14	53	14	1661	189	8.09	127.84	14	0	2.694	0.637706	90.46	138.9	61.1	13	26.03	2.21692e+06	4.43197e+06	830502	655197	1
797	P34241	Nucleolar pre-ribosomal-associated protein 1	Peak Found	High	Peak Found	High	High	0	6.66	2	3	3	3	1764	203.2	7.31	6.76	3	0	2.903	0.640579	122.92	137	63	72.26	90.26	79846	42967.5	9195.3	22639	1
965	Q12296	Protein MAM3	Peak Found	High	High	High	High	0	8.105	7	3	4	3	706	77.7	6.65	8.32	3	0	3.009	0.643362	21.64	127.7	72.3	60.9	75.18	80042.1	334351	37175.2	66082.9	1
1566	P40150	Ribosome-associated molecular chaperone SSB2	High	High	High	Peak Found	High	0	124.781	51	25	123	1	613	66.6	5.49	314.1	25	0	0.703	0.645671	65.57	82.6	117.4	64.25	20.01	194764	121494	183227	74916.8	1
334	P23642	Mannan polymerase I complex VAN1 subunit	High	High	Peak Found	Peak Found	High	0	10.614	9	3	7	3	535	61.1	5.4	17.68	3	0	2.565	0.646448	4.33	172.6	27.4	22.78	78.26	406134	487847	95647.8	14949.9	1
412	P54837	Endoplasmic reticulum vesicle protein 25	High	High	Not Found	High	High	0	12.469	22	3	9	3	211	24.1	5.52	15.31	3	0	0.718	0.646448	72.35	162.7	37.3	15.27		262163	350912		27470.2	1
583	P49089	Asparagine synthetase	High	High	Peak Found	Not Found	High	0.001	3.466	2	1	2	1	572	64.4	6.11	4.11	1	0	2.982	0.646448	15.1	149.8	50.2	14.33		27725.2	56486.4	9637.72		1
1039	Q12691	Sodium transport ATPase 5	High	High	Peak Found	Peak Found	High	0	19.926	9	9	10	9	1091	120.2	5.53	13.47	9	0	0.726	0.646448	91.87	124.2	75.8	57.51	42.5	134293	529306	86589.7	87523	1
1370	P45978	Protein SCD6	High	High	High	High	High	0	4.19	7	2	4	2	349	39.2	7.42	5	2	0	0.611	0.646448	44.76	103.9	96.1	30.5	19.84	63221.2	67809.4	38212.5	27553.9	1
1585	P38127	Mitochondrial carrier protein RIM2	High	High	High	High	High	0	11.194	11	4	9	4	377	42.1	9.61	17.08	4	0	2.672	0.646448	103.4	79.1	120.9	3.19	34.31	436904	694289	476754	425198	1
1214	P40540	ER membrane protein complex subunit 5	High	High	High	High	High	0	11.065	20	3	10	3	141	15.9	8.91	21.37	3	0	0.804	0.646732	72.72	113.7	86.3	10.7	55.14	467408	904232	237291	293873	1
1520	P38961	25S rRNA (adenine(645)-N(1))-methyltransferase	High	High	High	Peak Found	High	0	4.916	6	2	3	2	392	46	9.42	4.96	2	0	0.621	0.648438	84.02	89.9	110.1	9.96	3.53	54457.6	78629.5	59664.9	30857.2	1
1480	P19882	Heat shock protein 60, mitochondrial	High	High	High	High	High	0	100.563	47	21	76	21	572	60.7	5.31	179.07	21	0	0.806	0.650883	75.14	94.2	105.8	19.45	6.51	6.19285e+06	7.80568e+06	5.41845e+06	3.23008e+06	1
1593	P43573	Bud site selection protein 27	Peak Found	Not Found	High	Peak Found	Medium	0.025	1.942	1	1	1	1	796	91.4	4.73	0	1	0	0.633	0.650883	60.72	77.5	122.5		53.6	20585		20445.5	24682.7	1
740	P26783	40S ribosomal protein S5	High	High	High	High	High	0	61.643	43	13	113	13	225	25	8.59	273.12	13	0	2.649	0.658436	115.67	139.4	60.6	23.92	22.1	2.34083e+07	2.76564e+07	6.85388e+06	5.10604e+06	1
342	P40471	NADPH-dependent 1-acyldihydroxyacetone phosphate reductase	High	High	High	High	High	0	11.68	15	4	10	4	297	32.8	9.16	26.08	4	0	2.643	0.660512	103.25	171.2	28.8	6	92.94	2.14497e+06	3.88197e+06	774200	87061.3	1
661	P26321	60S ribosomal protein L5	High	High	High	High	High	0	31.802	32	7	28	7	297	33.7	6.83	55.58	7	0	2.644	0.660512	120.89	143.7	56.3	3.18	52.67	4.51046e+06	7.16896e+06	1.09434e+06	1.30104e+06	1
344	P38719	ATP-dependent RNA helicase DBP8	High	High	Peak Found	Peak Found	High	0	8.115	5	2	5	2	431	47.8	9.61	13.39	2	0	2.588	0.661107	85.4	170.7	29.3	11.62	69.79	273243	535645	27734.7	44456.7	1
588	Q12029	Sideroflexin FSF1	High	High	High	High	High	0	22.834	25	7	19	7	327	35.4	9.82	33.82	7	0	2.638	0.661107	28.35	149.3	50.7	0.15	1.44	1.68356e+06	2.80494e+06	541423	288413	1
1064	P09457	ATP synthase subunit 5, mitochondrial	High	High	Peak Found	High	High	0	16.276	26	4	8	4	212	22.8	9.57	19.88	4	0	0.722	0.661107	112.57	123.1	76.9	88.13	18.75	368232	142119	90909.1	64524.9	1
388	P40069	Importin subunit beta-4	High	High	High	High	High	0	54.903	20	16	41	16	1113	122.5	4.63	89.95	16	0	2.634	0.663473	94.02	165.7	34.3	19.34	57.04	4.9522e+06	1.08415e+07	1.6914e+06	390928	1
308	P38775	Putative uncharacterized protein YHR045W	High	High	Peak Found	Peak Found	High	0	5.743	7	3	3	3	560	62.7	7.05	4.01	3	0	2.94	0.663943	46.33	178.4	21.6	10.34	53.97	109513	157249	7709.15	9363.62	1
494	Q12136	Something about silencing protein 10	High	High	High	High	High	0	12.572	11	5	8	5	610	70.2	4.69	15.51	5	0	0.719	0.663943	99.2	156.9	43.1	10.85	42.21	169676	328979	34654.1	34870.1	1
1284	P31755	Initiation-specific alpha-1,6-mannosyltransferase	High	High	Peak Found	High	High	0	11.336	11	4	6	4	480	55.1	7.68	11.94	4	0	0.729	0.663943	126.11	109.6	90.4	41.34	40.77	129798	394084	100748	99147.8	1
1496	Q08193	1,3-beta-glucanosyltransferase GAS5	High	High	High	High	High	0	32.703	16	6	19	6	484	51.8	4.64	51.69	6	0	0.816	0.664219	46.74	92.5	107.5	25.53	32.94	2.51522e+06	6.02369e+06	2.59052e+06	2.26361e+06	1
321	P38791	Deoxyhypusine synthase	High	High	High	Not Found	High	0	6.744	12	3	4	3	387	42.9	5.77	6.5	3	0	0.604	0.664408	0	175.5	24.5	23.94		76794.5	179720	11918.3		1
426	P38962	Golgi apparatus membrane protein TVP23	High	High	High	High	High	0	10.102	11	3	6	3	199	23.1	8.68	14.96	3	0	2.827	0.664408	37.04	161.5	38.5	18.52	35.42	167227	361798	32972.5	29901.9	1
626	P18759	Vesicular-fusion protein SEC18	High	High	High	High	High	0	44.656	20	13	42	12	758	84	7.99	85.85	13	1	2.626	0.664408	58.62	146.3	53.7	0.51	22.68	2.67643e+06	4.48215e+06	784533	589411	1
532	P53879	GTP-binding protein RHO5	High	High	Peak Found	Peak Found	High	0	6.553	8	2	3	2	331	36.8	8.48	7.03	2	0	2.982	0.665262	41.38	153.5	46.5	22.71	40.2	82704.6	190109	20587.1	20080.8	1
613	Q12013	Probable palmitoyltransferase AKR2	High	High	High	Peak Found	High	0.001	3.257	1	1	3	1	749	85.2	6.74	6.78	1	0	2.765	0.665262	9.29	146.9	53.1	5.42	9.18	43008.5	77206.5	14181.2	8780.24	1
665	P07244	Bifunctional purine biosynthetic protein ADE5,7	High	High	High	High	High	0	75.898	29	17	54	17	802	86	5.27	139.64	17	0	2.621	0.665262	74.99	143.4	56.6	1.34	32.2	4.03534e+06	6.83726e+06	1.19485e+06	1.03251e+06	1
989	P32803	Endosomal protein P24B	High	High	High	High	High	0	14.458	20	3	14	3	203	23.3	6.79	29.15	3	0	2.616	0.665551	80.18	126.5	73.5	20.48	14.48	1.12261e+06	2.49861e+06	636969	425259	1
1377	P10127	Alcohol dehydrogenase 4	High	High	High	Peak Found	High	0	8.302	10	3	5	3	382	41.1	6.15	9.58	3	0	0.764	0.665551	35.69	103.5	96.5	7.36	16.88	192815	355754	157143	108590	1
1559	P31109	Synaptobrevin homolog 1	High	High	High	High	High	0	6.607	16	2	5	1	117	13.2	8.16	9.86	2	0	0.724	0.665551	52.48	84	116	32.98	57.92	106937	285940	113552	147357	1
1588	Q05933	Actin-related protein 2/3 complex subunit 3	Peak Found	Peak Found	Peak Found	High	Medium	0.029	1.856	6	1	1	1	178	20.6	7.97	1.89	1	0	0.641	0.665551	24.39	78.1	121.9	27.54	26.27	25670.9	63319.4	37848.1	29962.8	1
1583	Q99220	Protein OS-9 homolog	Not Found	Peak Found	High	Peak Found	Medium	0.034	1.766	1	1	1	1	542	61.2	4.61	0	1	0	0.662	0.665732	85.41	79.7	120.3		70.6		14765.8	7258.29	11812	1
1662	P15019	Transaldolase	High	High	High	High	High	0	10.519	13	4	9	4	335	37	6.43	18.7	4	0	0.67	0.665732	38.08	58.5	141.5	60.12	29.11	46166	190270	133493	110193	1
284	Q01329	Pre-tRNA-processing protein PTA1	High	High	Peak Found	Not Found	High	0	10.091	6	4	7	4	785	88.4	6.25	11.56	4	0	2.924	0.66602	0.14	184.1	15.9	6.36		167754	305168	14160.3		1
860	P36160	Ribosome biogenesis protein RPF2	High	High	High	Peak Found	High	0	5.279	6	2	4	2	344	39.6	9	8.53	2	0	2.505	0.666677	74.77	133.2	66.8	29.27	32.51	390566	426621	117600	102099	1
1154	Q03655	Probable 1,3-beta-glucanosyltransferase GAS3	High	High	High	High	High	0	40.075	29	10	25	10	524	56.8	4.79	53.81	10	0	0.824	0.670507	129.53	117.4	82.6	2.17	46	1.15236e+06	1.97555e+06	1.07956e+06	298797	1
570	P50094	Inosine-5'-monophosphate dehydrogenase 4	High	High	High	Peak Found	High	0	18.456	15	5	13	3	524	56.4	8.16	32.75	5	1	2.597	0.673438	82.15	150.9	49.1	16.49	30.48	550770	1.15742e+06	151504	127617	1
957	P46672	tRNA-aminoacylation cofactor ARC1	High	Peak Found	High	High	High	0	6.64	6	2	5	2	376	42.1	7.88	9.35	2	0	2.446	0.673438	114.03	127.9	72.1	17.24	30.66	425462	553599	159388	134625	1
847	P23248	40S ribosomal protein S1-B	High	High	High	High	High	0	60.17	50	14	87	4	255	28.8	10.02	184.55	14	11	2.591	0.675888	114.1	133.8	66.2	14.86	47.88	4.93069e+07	6.63818e+07	1.44542e+07	1.59023e+07	1
594	P32776	General transcription and DNA repair factor IIH subunit TFB1	Peak Found	High	Peak Found	Peak Found	Medium	0.032	1.795	2	1	1	1	642	72.8	6.9	2.16	1	0	2.924	0.676406	47.48	149	51	36.62	54.48	14546.1	41086.5	9113.78	2198.94	1
633	P38972	Phosphoribosylformylglycinamidine synthase	High	High	High	High	High	0	40.595	12	11	17	11	1358	148.8	5.27	39.43	11	0	2.58	0.676406	77.39	145.7	54.3	6.36	3.85	690667	1.04947e+06	236854	121940	1
651	Q06405	ATP synthase subunit f, mitochondrial	High	High	Peak Found	High	Medium	0.019	2.14	11	1	3	1	101	11.3	10.1	5.24	1	0	2.582	0.676406	51.48	144.2	55.8	30.07	55.97	812827	877445	156277	196238	1
1023	P04173	3-isopropylmalate dehydrogenase	High	High	High	High	High	0	67.649	52	16	67	16	364	38.9	5.76	171.8	16	0	2.583	0.676406	114.41	124.9	75.1	23.03	31	7.54025e+06	9.02426e+06	2.88497e+06	2.4489e+06	1
1304	P47154	CAAX prenyl protease 1	High	High	High	High	High	0	23.346	19	7	21	7	453	52.3	7.91	41.52	7	0	0.83	0.676406	78.94	108.6	91.4	4.72	51.85	1.5865e+06	2.4671e+06	823588	966080	1
1379	P39079	T-complex protein 1 subunit zeta	High	High	High	High	High	0	39.787	23	9	29	9	546	59.9	5.86	59.25	9	0	0.83	0.676406	100.59	103.4	96.6	16.72	31.33	1.49368e+06	1.95815e+06	925402	789426	1
1438	P39106	Alpha-1,3-mannosyltransferase MNN1	High	High	High	High	High	0	31.62	13	9	27	9	762	88.5	7.24	48.71	9	0	0.83	0.676406	80.17	97.9	102.1	6.27	33.4	1.39616e+06	2.5366e+06	1.1196e+06	985054	1
1521	P40312	Cytochrome b5	High	High	High	High	High	0	25.45	45	4	20	4	120	13.3	4.49	46.79	4	0	0.829	0.676406	77.59	89.9	110.1	4.93	48.15	6.58185e+06	1.17323e+07	5.48621e+06	6.06209e+06	1
1578	P49573	Copper transport protein CTR1	Peak Found	High	Peak Found	Not Found	Medium	0.018	2.165	4	1	1	1	406	44.4	6.18	2.63	1	0	0.678	0.676406	1.74	80.8	119.2	1.66		62799.1	101984	85739		1
1589	P09620	Pheromone-processing carboxypeptidase KEX1	High	High	Peak Found	Peak Found	High	0.001	3.231	1	1	2	1	729	82.2	4.56	4.15	1	0	0.64	0.677609	28.71	78	122	30.67	19.27	46115.2	119127	73342	52449.9	1
331	P21375	Fumarate reductase 2	High	High	High	High	High	0	16.16	15	6	17	6	501	55	9.01	26.43	6	0	0.833	0.678786	94.9	173.1	26.9	18.77	33.46	2.02523e+06	2.57815e+06	202771	178569	1
490	P50095	Inosine-5'-monophosphate dehydrogenase 3	High	High	Peak Found	Peak Found	High	0	17.683	15	4	12	2	523	56.5	7.4	32.02	4	0	2.805	0.679422	23.48	157.4	42.6	23.57	23.56	158979	188801	40287	15645.8	1
1536	P07260	Eukaryotic translation initiation factor 4E	High	High	High	Peak Found	High	0	10.153	24	4	8	4	213	24.2	5.49	19.93	4	0	0.803	0.681543	49.91	88	112	1.6	32.72	198817	323148	296791	100714	1
576	P53868	Alpha-1,2-mannosyltransferase ALG9	High	High	High	High	High	0	18.297	14	6	14	6	555	63.7	8.62	20.45	6	0	2.561	0.684306	77.26	150.5	49.5	1.42	56.05	1.12881e+06	1.83948e+06	226195	284424	1
1470	P15703	Glucan 1,3-beta-glucosidase	High	High	High	Peak Found	High	0	15.011	16	4	11	4	313	34.1	4.51	24.66	4	0	0.838	0.684306	55.2	95	105	16.91	16.07	504741	659878	413450	282403	1
1584	Q03653	Protein EFR3	Peak Found	High	High	High	High	0.001	3.225	1	1	3	1	782	89.1	7.46	3.73	1	0	0.659	0.684484	29.05	79.5	120.5	17.91	30.72	35985	46374.8	36086.4	30504.4	1
590	Q07915	Ribosome biogenesis protein RLP24	High	High	High	High	High	0	6.505	9	2	10	2	199	24	9.57	19.65	2	0	2.558	0.684731	54.51	149.2	50.8	0.2	61.44	2.10886e+06	3.49609e+06	421047	580543	1
1592	P38288	Protein TOS1	High	High	High	Peak Found	High	0	5.234	7	2	3	2	455	48	4.67	5.47	2	0	0.669	0.690585	20.73	77.6	122.4	22.68	13.7	54128.9	124374	85233.3	56274.8	1
376	P36015	Synaptobrevin homolog YKT6	High	High	Peak Found	Peak Found	High	0	9.287	19	3	4	3	200	22.7	5.69	10.56	3	0	2.536	0.691483	77.04	167	33	12.17	96.48	260524	514684	22829.7	65695	1
558	P40527	Probable phospholipid-transporting ATPase NEO1	High	High	High	High	High	0	29.031	9	8	19	8	1151	130.1	6.47	37.14	8	0	2.532	0.691483	71.08	152.1	47.9	5.55	21.85	636687	1.14499e+06	166874	123873	1
569	P32332	Mitochondrial oxaloacetate transport protein	High	High	High	High	High	0	17.931	13	4	19	4	324	35.1	9.55	40.3	4	0	2.529	0.691483	24.24	151.1	48.9	3.34	4.48	1.32823e+06	2.10631e+06	381256	220828	1
599	Q08687	Translation machinery-associated protein 16	Peak Found	High	Peak Found	Peak Found	High	0	4.367	7	1	1	1	178	20.8	10.07	2.68	1	0	2.873	0.691483	53.66	148.4	51.6	2.18	48.79	101720	163969	22776.7	25426.4	1
616	Q03554	Protein transport protein GOT1	Peak Found	High	Peak Found	Peak Found	Medium	0.024	1.964	6	1	1	1	138	15.4	10.59	2.19	1	0	2.755	0.691483	95.85	146.7	53.3	43.56	93.95	24476.2	76915.6	5135.93	13843.3	1
627	P46964	Dolichyl-diphosphooligosaccharide--protein glycosyltransferase subunit OST2	High	High	Peak Found	High	High	0	7.559	13	1	4	1	130	14.7	9.28	7.95	1	0	2.723	0.691483	31.88	146.3	53.7	33.86	19.25	213299	217625	65885.8	27235.8	1
628	P53183	Putative uncharacterized oxidoreductase YGL039W	High	High	High	Peak Found	High	0	4.08	4	1	3	1	348	38.2	5.96	8.55	1	0	2.719	0.691483	59.31	146.2	53.8	11.38	56.27	190679	269776	39748.8	50165.3	1
629	P53292	37S ribosomal protein S35, mitochondrial	High	Not Found	Peak Found	Peak Found	High	0.001	3.277	3	1	1	1	345	39.6	9.88	2.11	1	0	2.704	0.691483	49.91	146	54		45.12	55997.5		13932.6	14672.1	1
691	P38248	Cell wall protein ECM33	High	High	High	High	High	0	29.502	14	5	49	5	429	43.7	4.91	130.55	5	0	2.53	0.691483	92.88	141.9	58.1	0.98	31.98	6.34768e+06	1.04087e+07	1.92225e+06	1.65566e+06	1
786	P41807	V-type proton ATPase subunit H	High	Peak Found	High	Peak Found	High	0	8.093	8	3	3	3	478	54.4	6.35	7.47	3	0	2.604	0.691483	97.49	137.5	62.5	25.44	74.81	177750	425180	163616	27401.3	1
819	P39007	Dolichyl-diphosphooligosaccharide--protein glycosyltransferase subunit STT3	High	High	High	High	High	0	22.549	11	7	22	7	718	81.5	8	43.52	7	0	2.528	0.691483	81.62	136	64	14.4	21.37	637390	1.29988e+06	362132	145188	1
1008	Q04660	Ribosome biogenesis protein ERB1	High	High	High	High	High	0	24.185	11	8	14	8	807	91.6	5.17	26.28	8	0	0.847	0.691483	90.92	125.5	74.5	18.71	22.25	420116	911460	227550	169886	1
1018	P48231	Tricalbin-2	High	High	High	Peak Found	High	0	9.125	3	3	4	2	1178	132.4	8.54	9.4	3	0	0.672	0.691483	96.75	125	75	1.39	81.56	64389.5	109169	18936.9	38348.3	1
1120	P32602	Alpha-soluble NSF attachment protein	High	High	High	High	High	0	31.829	34	8	20	8	292	32.8	5.1	44.47	8	0	0.846	0.691483	86.98	119.5	80.5	13.5	15.65	524659	1.05637e+06	326046	221358	1
1185	Q04472	Mitochondrial inner membrane i-AAA protease supercomplex subunit MGR3	High	High	Peak Found	Peak Found	High	0	6.826	5	2	3	2	501	58	8.34	7.8	2	0	0.697	0.691483	42.43	115.6	84.4	16.51	41.34	110690	145554	49765.5	49402.9	1
1273	P32857	Membrane protein PTM1	High	High	High	Peak Found	High	0	9.5	6	3	8	3	523	60	5.17	15.25	3	0	0.747	0.691483	4.31	110.2	89.8	4.43	1.96	138563	245250	107501	60084.2	1
1575	P38885	Altered inheritance of mitochondria protein 46, mitochondrial	Peak Found	High	High	Not Found	Medium	0.019	2.153	5	1	2	1	310	34.1	9.06	4.47	1	0	0.682	0.691483	40.85	81.1	118.9	37.56		16823.9	48203.4	30308.3		1
1582	P32830	Mitochondrial import inner membrane translocase subunit TIM12	Peak Found	High	Peak Found	Peak Found	High	0.004	2.755	8	1	1	1	109	12.3	6.74	2.05	1	0	0.666	0.691483	14.04	79.9	120.1	4.72	13.78	32295.6	50222.3	39848.4	26339.2	1
1586	Q07953	Ribosome maturation protein SDO1	Peak Found	High	High	Peak Found	Medium	0.013	2.223	3	1	2	1	250	28.3	9.22	4.01	1	0	0.654	0.691483	36.99	79.1	120.9	46.7	46.07	37732.7	124587	54297.8	58041.4	1
674	P46971	Dolichyl-phosphate-mannose--protein mannosyltransferase 4	Peak Found	High	High	High	High	0	10.946	6	3	5	3	762	87.9	6.93	9.35	3	0	2.832	0.691716	120.97	142.8	57.2	19.52	84.23	124913	274161	27077.5	58085.4	1
644	Q03088	Styryl dye vacuolar localization protein 3	High	Peak Found	Peak Found	Peak Found	Medium	0.039	1.701	1	1	1	1	825	92.1	8.73	2.04	1	0	2.605	0.692821	82.19	144.5	55.5	4.96	70.42	56024.1	86831.9	11257.6	18258.8	1
725	P40086	Cytochrome c oxidase assembly protein COX15	High	High	High	Peak Found	High	0	18.252	11	5	10	5	486	54.6	10.17	23.98	5	0	2.395	0.692821	86.93	140.5	59.5	11.22	31.9	462265	900963	249507	85705	1
1097	P15108	ATP-dependent molecular chaperone HSC82	High	High	Peak Found	Peak Found	High	0	92.588	28	19	75	2	705	80.9	4.83	183.61	19	0	0.693	0.692821	40.28	121.1	78.9	11.46	45.69	112806	220631	53339.4	56677	1
875	P38169	Kynurenine 3-monooxygenase	High	High	Peak Found	High	High	0	14.383	15	5	9	5	460	52.4	8.4	18.27	5	0	0.854	0.693258	73.34	132.4	67.6	2.67	44.94	465926	745956	157234	165107	1
1485	P38261	Exocyst complex component EXO84	High	High	Peak Found	Peak Found	High	0	6.01	4	2	3	2	753	85.5	7.94	7.31	2	0	0.667	0.693258	20.76	93.5	106.5	3.22	21.4	41176.3	71645	38534	28418.1	1
1639	Q00402	Nuclear migration protein NUM1	Peak Found	High	High	Peak Found	High	0	12.226	3	5	6	5	2748	312.8	5.4	8.08	5	0	0.755	0.693258	123.45	67.4	132.6	34.3	46.64	72179.8	196836	120922	130444	1
654	P32905	40S ribosomal protein S0-A	High	High	Not Found	Not Found	High	0	46.554	43	7	65	1	252	28	4.72	165.72	7	6	2.513	0.694792	113.28	144	56	0.11	34.88	2.71336e+07	4.50379e+07	7.67098e+06	6.9004e+06	1
1247	P53075	Outer spore wall assembly protein SHE10	High	High	High	High	High	0	34.143	16	10	20	10	577	66.8	5.86	40.87	10	0	0.854	0.694792	122.14	111.7	88.3	14.68	1.63	1.10815e+06	2.26903e+06	921096	489310	1
1432	Q00055	Glycerol-3-phosphate dehydrogenase	High	High	High	High	High	0	26.993	18	6	25	5	391	42.8	5.47	59.93	6	1	0.854	0.694792	77.36	98.6	101.4	21.05	43.54	1.59699e+06	3.58344e+06	1.30041e+06	1.33587e+06	1
1505	P0C0X0	40S ribosomal protein S28-B	High	High	Not Found	Not Found	High	0	11.517	48	3	18	1	67	7.6	10.78	35.88	3	2	0.855	0.694937	97.43	91.6	108.4	11.08	28.17	3.11605e+06	6.061e+06	3.0539e+06	2.48601e+06	1	Acetyl [N-Term]
401	P38355	Uncharacterized transporter YBR287W	High	High	High	Peak Found	High	0	15.503	16	4	8	4	427	47.5	4.89	19.45	4	0	0.762	0.694991	108.96	164.6	35.4	23.57	106.35	228638	271531	103553	7969.55	1
1460	P05319	60S acidic ribosomal protein P2-alpha	High	High	High	High	High	0	50.86	79	5	160	5	106	10.7	4.04	451.44	5	0	0.856	0.694991	57.6	95.6	104.4	19.25	25.82	3.83299e+07	4.8454e+07	2.83969e+07	2.23328e+07	1
1581	P32462	Delta(14)-sterol reductase ERG24	High	Peak Found	High	High	High	0.001	3.446	2	1	3	1	438	50.6	8.85	5.2	1	0	0.671	0.694991	40.51	80.3	119.7	5.9	38.75	56872.9	102781	62444.6	59570.4	1
431	P14020	Dolichol-phosphate mannosyltransferase	High	High	High	Peak Found	High	0	18.351	20	6	22	6	267	30.3	7.88	49.67	6	0	0.856	0.695252	217.99	161.2	38.8	23.04	40.14	4.28214e+06	5.12427e+06	611861	596239	1
1569	Q08144	t-SNARE affecting a late Golgi compartment protein 2	High	High	High	Peak Found	High	0	6.386	6	2	3	2	397	45.8	5.26	6.6	2	0	2.588	0.696605	63.19	82.4	117.6	16.59	43.75	29577.1	62245.5	32294.6	33283.9	1
1613	P33297	26S proteasome regulatory subunit 6A	High	High	High	High	High	0	24.636	21	7	16	7	434	48.2	5.06	29.6	7	0	0.857	0.696771	97.98	72.7	127.3	6.24	9.02	505161	768857	743684	459396	1
675	P61830	Histone H3	High	High	Peak Found	High	High	0.008	2.392	5	1	7	1	136	15.3	11.43	5.74	1	0	2.495	0.699547	75.87	142.8	57.2	18.21	71.18	3.13864e+06	4.02753e+06	594875	978778	1
1469	P26793	Flap endonuclease 1	High	High	High	Peak Found	High	0	7.572	9	3	5	3	382	43.3	8.92	11.15	3	0	0.759	0.699547	85.26	95.1	104.9	30.72	58.71	147629	157827	78538.9	103301	1
582	P53914	RNA cytidine acetyltransferase	High	High	High	High	High	0	23.459	10	9	18	9	1056	119.3	7.8	33.86	9	0	2.492	0.70041	41.87	150	50	1.92	10.58	710093	1.21298e+06	242053	113266	1
536	P07245	C-1-tetrahydrofolate synthase, cytoplasmic	High	High	High	High	High	0	46.69	15	12	32	12	946	102.1	6.84	81.94	12	0	2.49	0.700977	85.97	153.1	46.9	0.68	35.63	1.69178e+06	2.83983e+06	630109	204694	1
640	P40506	Phosphopantothenate--cysteine ligase CAB2	Peak Found	High	Peak Found	Peak Found	High	0	3.775	3	1	1	1	365	41.8	8.27	2.36	1	0	2.646	0.707603	61.32	145.1	54.9	2.01	54.71	119636	193318	27748.5	34122.8	1
1579	P36027	Cell wall integrity sensor MID2	High	High	Peak Found	Peak Found	High	0.001	3.103	3	1	2	1	376	39.1	5.64	3.73	1	0	0.676	0.707603	26.88	80.7	119.3	22.31	29.41	50371.2	115118	66200.2	54883.9	1
441	P30665	DNA replication licensing factor MCM4	High	High	High	High	High	0	28.408	12	9	24	9	933	104.9	6.21	60.56	9	0	2.471	0.711803	49.75	160.5	39.5	20.03	32.59	947627	1.18458e+06	149759	130180	1
861	P40364	Mitochondrial peculiar membrane protein 1	High	High	Peak Found	Peak Found	High	0	5.404	8	2	5	2	252	28.5	5.92	9.2	2	0	0.702	0.711803	62.28	133.2	66.8	10.06	37.16	136747	197156	45679.1	42536.8	1
1311	P12385	Eukaryotic peptide chain release factor subunit 1	High	High	High	High	High	0	29.698	22	8	21	8	437	49	5.05	46.04	8	0	0.868	0.711803	141.08	108.4	91.6	7.68	27.24	1.52177e+06	2.26951e+06	937716	753054	1
1594	Q12025	Endoplasmic reticulum membrane protein complex subunit 10	High	Peak Found	High	High	High	0	8.425	13	2	5	2	205	22.8	4.88	11.58	2	0	0.783	0.711803	24.23	77.3	122.7	49.99	25	154316	122550	132467	102936	1
605	P38286	Very-long-chain 3-oxoacyl-CoA reductase	High	High	High	High	High	0	10.531	15	3	11	3	347	38.7	9.48	26.73	3	0	2.308	0.714733	41.93	148	52	53.28	14.23	648317	487908	158726	70514.4	1
573	P43613	ER-localized J domain-containing protein 5	High	High	High	High	High	0	7.524	12	2	6	2	295	34.2	9.77	17.47	2	0	2.48	0.717407	34.58	150.8	49.2	19.82	39.64	226175	498629	59667	57699.9	1
733	P39704	Protein ERP2	High	High	High	High	High	0	7.432	12	1	7	1	215	24	5.12	26.84	1	0	2.329	0.717407	37.43	139.9	60.1	34.62		439795	443582	137685		1
762	P25087	Sterol 24-C-methyltransferase ERG6	High	High	High	High	High	0	53.602	36	11	49	11	383	43.4	5.77	117.92	11	0	2.453	0.717407	81.87	138.5	61.5	16.42	30.9	4.68371e+06	6.16684e+06	1.3864e+06	1.1752e+06	1
796	Q06497	Peroxisomal adenine nucleotide transporter 1	High	High	High	High	High	0	13.307	12	3	11	3	328	36.3	9.77	18.8	3	0	2.297	0.717407	88.76	137.1	62.9	15.61	36.59	366262	760024	134888	124512	1
1394	P54115	Magnesium-activated aldehyde dehydrogenase, cytosolic	High	High	High	High	High	0	22.494	20	9	19	9	500	54.4	5.44	27.45	9	0	0.871	0.717407	91.91	102.2	97.8	16.59	32.73	470841	990801	374715	326404	1
1451	Q08579	Thiamine transporter THI72	High	High	High	Peak Found	High	0	11.817	6	4	15	1	599	67.1	7.18	30.34	4	3	0.877	0.717407	78.69	96.6	103.4	23.54	41.08	866082	2.01497e+06	761890	753289	1
1570	Q12247	rRNA-processing protein FYV7	High	Peak Found	Not Found	Peak Found	Medium	0.035	1.752	5	1	2	1	151	18.2	10.26	3.35	1	0	0.694	0.717407	27.88	81.9	118.1	26.14		63669.1	72830.8		38736	1
1571	P47002	SPS-sensor serine protease component SSY5	Peak Found	High	Not Found	Peak Found	Medium	0.028	1.885	4	1	1	1	699	77.5	6.46	3.95	1	0	0.693	0.717407	7.17	81.9	118.1	6.83		58223.5	87883.7		40730.5	1
1577	P47095	Methylthioribulose-1-phosphate dehydratase	Peak Found	Peak Found	Peak Found	High	Medium	0.02	2.109	3	1	1	1	244	27.4	6.6	1.77	1	0	0.681	0.717407	56.78	81	119	5.88	52.44	43249.3	66164.8	38655.5	45781.9	1
424	P08536	Sulfate adenylyltransferase	High	High	High	High	High	0	11.942	7	4	9	4	511	57.7	5.82	17.5	4	0	2.29	0.717446	42.97	161.7	38.3	13.27	55.26	471639	946506	75994.7	94305	1
368	Q12496	Uncharacterized protein YOL098C	High	High	Peak Found	Peak Found	High	0	11.777	4	4	5	4	1037	118.3	5.05	12.2	4	0	2.68	0.720015	38.01	167.9	32.1	34.65	2.88	85978	235732	19344	10953.2	1
671	P19658	Exocyst complex component EXO70	High	Peak Found	Peak Found	Peak Found	Medium	0.022	2.068	1	1	2	1	623	71.2	7.49	0	1	0	2.516	0.720015	46.01	143.1	56.9	19.22	47.4	31025.8	67805.3	9338.7	10196.4	1
680	P13856	Ras-related protein RSR1	High	Peak Found	High	Peak Found	High	0.01	2.355	4	1	2	1	272	30.4	9.19	3.76	1	0	2.479	0.720015	21.56	142.5	57.5	22.11	12.01	57761.5	70059.9	20288.5	9302.66	1
1347	P45818	ATP-dependent RNA helicase ROK1	High	High	High	High	High	0	12.205	11	4	8	4	564	63.6	9.14	14.58	4	0	0.813	0.720015	46.5	105.4	94.6	11.41	17.12	185742	363008	149913	103947	1
1458	P0CX63	Transposon Ty2-F Gag-Pol polyprotein	Peak Found	High	High	High	High	0	16.337	4	6	10	2	1770	201.9	8.05	19.85	6	0	0.73	0.720015	44.53	95.8	104.2	32.8	5.39	73660.3	196409	98684.9	49706.9	1
1484	P47120	Deoxyhypusine hydroxylase	High	High	Peak Found	High	High	0	4.256	6	2	5	2	325	36.1	4.87	9.88	2	0	0.794	0.720015	37.97	93.6	106.4	0.56	33.03	141900	234064	118536	103716	1
520	P22353	54S ribosomal protein L8, mitochondrial	High	High	High	High	High	0	5.97	7	2	5	2	238	26.9	9.8	3.84	2	0	2.6	0.721452	57.1	154.7	45.3	9.84	52.99	112933	215841	22364.7	26728.5	1
763	P47818	Protein CCC1	High	High	High	High	High	0	31.646	29	8	21	8	322	34.2	5.1	43.05	8	0	2.419	0.721595	53.21	138.5	61.5	5.88	40.54	965839	1.74513e+06	311614	305541	1
1419	Q99287	Protein SEY1	High	High	High	High	High	0	21.363	12	9	18	9	776	89.4	5.29	37.45	9	0	0.887	0.721595	76.96	100	100	6.19	15.5	688558	1.24951e+06	602769	408350	1
1528	P28241	Isocitrate dehydrogenase	High	High	Peak Found	Peak Found	High	0	10.486	14	4	5	4	369	39.7	8.69	10.03	4	0	0.888	0.721838	122.64	88.8	111.2	54.87	51.45	775885	568816	412185	480370	1
622	P38694	Putative aldehyde dehydrogenase-like protein YHR039C	High	High	High	High	High	0	53.002	27	12	54	12	644	71.3	7.69	127.11	12	0	2.41	0.725419	83.85	146.5	53.5	6.91	2.38	3.04642e+06	5.58518e+06	1.07625e+06	605120	1
1392	Q06698	Putative ATP-dependent RNA helicase YLR419W	High	High	High	Peak Found	High	0	7.833	3	4	6	4	1435	162.9	9.1	7.27	4	0	0.822	0.725419	65.18	102.3	97.7	9.66	29.4	189828	275230	128259	106322	1
775	P07280	40S ribosomal protein S19-A	High	High	High	High	High	0	43.36	53	7	55	7	144	15.9	9.61	144.35	7	0	2.406	0.726396	94.68	138	62	21.6	16.15	2.90047e+07	3.54407e+07	9.32391e+06	6.37609e+06	1
357	Q12149	Exosome complex exonuclease RRP6	High	High	Not Found	Peak Found	High	0	4.476	3	2	2	2	733	84	7.14	3.84	2	0	2.474	0.732661	66.67	169.1	30.9	48.58		55043.7	44714		3579.1	1
395	P53134	Putative oligopeptide transporter YGL114W	High	High	Peak Found	Peak Found	High	0	4.27	3	2	2	2	725	80	6.65	4.23	2	0	2.437	0.732661	102.78	165	35	23.32	80.65	44788.4	103866	5493.47	10913.4	1
669	P32337	Importin subunit beta-3	High	High	Peak Found	Not Found	High	0	4.689	2	2	3	2	1089	121	4.74	5.95	2	0	2.527	0.732661	4.01	143.3	56.7	3.82		41752.5	73273	15895.1		1
703	P48362	Protein HGH1	Not Found	High	Not Found	Peak Found	High	0	5.042	3	1	1	1	394	44.9	4.73	3.03	1	0	2.431	0.732661	0	141.7	58.3				55939.3		7043.72	1
493	P03965	Carbamoyl-phosphate synthase arginine-specific large chain	High	High	High	Peak Found	High	0	23.531	9	9	19	7	1118	123.8	5.31	38.25	9	0	2.292	0.734336	21.58	157	43	12.35	31.29	316877	627673	110914	38448.3	1
713	P05030	Plasma membrane ATPase 1	High	High	High	High	High	0	217.52	39	32	357	9	918	99.6	5.11	915.62	32	28	2.387	0.734336	131.08	141.3	58.7	6.06	47.44	1.75568e+08	2.67898e+08	4.61e+07	5.03621e+07	1
692	Q08224	Hydroxymethylpyrimidine/phosphomethylpyrimidine kinase THI20	High	High	High	Peak Found	High	0	37.997	25	11	19	11	551	61.2	6.16	47.24	11	0	0.901	0.7388	108.74	141.9	58.1	12.62	16.63	1.13578e+06	2.25837e+06	423516	291602	1
1122	Q12754	Ribosomal RNA-processing protein 12	High	High	High	High	High	0	16.401	5	6	13	6	1228	137.4	7.02	26.55	6	0	2.27	0.7388	35.18	119.4	80.6	12.43	14.97	319695	633904	198582	133510	1
1501	P32288	Glutamine synthetase	High	High	High	High	High	0	19.221	18	6	15	6	370	41.7	6.34	26.57	6	0	0.901	0.7388	78.12	92	108	18.85	38.98	952040	2.06966e+06	902249	863784	1
645	Q08273	RING-box protein HRT1	High	High	Peak Found	Not Found	High	0	5.753	12	1	3	1	121	13.9	5.81	8.13	1	0	2.603	0.739003	17.62	144.5	55.5	16.69		83186.4	175322	33683.7		1
666	Q06143	Mitochondrial dicarboxylate transporter	High	High	High	Peak Found	High	0.004	2.832	3	1	3	1	298	33	9.63	5.9	1	0	2.535	0.740797	32.86	143.4	56.6	8.6	32.43	77152	144874	38240.8	13033.4	1
1368	P40012	Protoporphyrinogen oxidase	High	High	High	High	High	0	33.463	22	10	22	10	539	59.7	9.28	45.42	10	0	0.904	0.740972	63.7	104	96	27.69	42.39	663639	1.64064e+06	513572	518250	1
358	P39012	GPI transamidase component GAA1	High	High	Peak Found	Peak Found	High	0	4.16	2	2	3	2	614	69.2	6.25	0	2	0	2.534	0.742481	65.66	168.8	31.2	22.98	57.61	30645.7	70723.2	4061.1	5243.08	1
706	P29366	Bud emergence protein 1	Peak Found	High	Peak Found	Peak Found	High	0	4.163	3	1	2	1	551	61.6	8.62	2.97	1	0	2.418	0.742811	73.09	141.5	58.5	0.08	62.56	39210.2	65264.5	9444.96	13281	1
802	P53073	ER membrane protein complex subunit 4	High	High	Peak Found	High	High	0	8.627	18	3	5	3	190	21.4	9.6	8.82	3	0	2.283	0.742811	45.03	136.8	63.2	11.17	49.89	263453	513143	85377.5	97008.7	1
829	P47047	ATP-dependent RNA helicase DOB1	Peak Found	High	High	Peak Found	High	0	11.225	4	4	6	4	1073	122	6.34	13.68	4	0	0.753	0.74386	81.79	135.2	64.8	15.05	11.86	118772	244511	64565.7	29668.9	1
585	Q01802	Aspartate aminotransferase, mitochondrial	High	High	Peak Found	Peak Found	High	0	6.36	6	2	3	2	451	51.8	8.92	7.77	2	0	2.559	0.744302	43.37	149.6	50.4	14.54	65.77	117580	159029	55425.5	11002.1	1
1356	Q01939	26S proteasome regulatory subunit 8 homolog	High	High	High	High	High	0	15.171	16	5	13	4	405	45.2	9.01	23.72	5	0	0.893	0.745378	123.23	104.9	95.1	10.21	19.37	332303	478066	300933	124179	1
710	Q08485	Nicotinamide riboside transporter 1	Peak Found	High	Peak Found	Peak Found	High	0	11.539	6	4	11	1	598	67.1	7.69	21.23	4	0	2.414	0.74745	59.4	141.4	58.6	6.22	54.61	53953.9	97953.4	14552.7	17866.1	1
551	P35191	DnaJ homolog 1, mitochondrial	Peak Found	High	Peak Found	Peak Found	High	0	4.181	5	2	3	2	511	55.5	9.22	0	2	0	0.839	0.747493	85.9	152.2	47.8	21.47	16.33	262225	321013	74366.4	32059.8	1
1558	P38828	Protein LSM12	Peak Found	High	Peak Found	Peak Found	High	0	4.421	8	1	1	1	187	21.3	9.39	3.1	1	0	0.732	0.747493	45.69	84.5	115.5	6.19	43.35	21803	33209.2	19456.1	19926	1
377	P32802	Transmembrane 9 superfamily member 1	Peak Found	High	Not Found	Not Found	High	0	9.15	5	3	4	2	667	75.9	6.87	10.63	3	1	2.567	0.749382	246.66	166.9	33.1	13.21	124.34	166635	229708	111255	3886.85	1
391	P20448	ATP-dependent RNA helicase HCA4	High	High	Peak Found	Peak Found	High	0	11.383	6	3	4	3	770	87.1	7.42	10.31	3	0	2.537	0.749382	47.65	165.4	34.6	6.7	43.81	131809	199304	33936.1	9722.68	1
405	P53235	Eukaryotic translation initiation factor 2A	High	High	Peak Found	Peak Found	High	0	17.453	11	4	7	4	642	71.3	8.91	11.42	4	0	2.392	0.749382	91.24	164	36	21.47	50.07	281371	344461	34225.4	39003.7	1
488	P40515	Mitochondrial fission 1 protein	High	High	Peak Found	High	High	0	10.921	20	2	6	2	155	17.7	9.1	13.88	2	0	2.587	0.749382	93.5	157.5	42.5	25.07	80.63	189807	220522	21005	41714.1	1
635	P29478	Signal recognition particle subunit SEC65	High	High	High	Peak Found	High	0	11.798	17	4	10	4	273	31.2	9.07	17.23	4	0	0.837	0.749382	67.15	145.5	54.5	18.26	2.88	267444	342923	80784.5	45746.2	1
1601	Q12329	Heat shock protein 42	High	High	High	Peak Found	High	0	7.428	13	3	7	3	375	42.8	5.08	13.2	3	0	0.913	0.749382	94.34	77	123	15.69	55.32	658146	1.36725e+06	727261	903378	1
465	P06634	ATP-dependent RNA helicase DED1	High	High	High	High	High	0	96.084	40	19	61	18	604	65.5	7.83	154.89	19	0	2.345	0.749492	72.76	158.8	41.2	2.89	25.99	7.87519e+06	1.25682e+07	1.55535e+06	1.2263e+06	1
552	P35723	Endoplasmic reticulum transmembrane protein 1	High	High	High	High	High	0	18.854	29	4	12	4	206	23.4	9.77	28.85	4	0	2.344	0.749893	40.38	152.2	47.8	10.63	39.27	1.34446e+06	2.59852e+06	320624	308298	1
1203	Q12118	Small glutamine-rich tetratricopeptide repeat-containing protein 2	High	High	Peak Found	High	High	0	6.531	6	2	5	2	346	37.2	4.79	9.39	2	0	0.762	0.751963	59.09	114.2	85.8	0.66	54.74	118022	194383	54913.3	67557.8	1
1517	P10080	Single-stranded nucleic acid-binding protein	High	High	High	High	High	0	17.75	31	6	10	6	294	33	5.66	16.29	6	0	0.916	0.751963	107.56	90.1	109.9	15.67	30.7	735992	1.52857e+06	753903	637156	1
1190	P40970	Serine palmitoyltransferase 2	High	High	High	High	High	0	41.563	20	11	34	11	561	63.1	8.1	84.6	11	0	0.918	0.752612	63.17	115.3	84.7	6.34	20.25	1.11943e+06	2.03583e+06	697366	505813	1
1551	P22354	54S ribosomal protein L20, mitochondrial	Peak Found	High	Not Found	Peak Found	High	0.001	3.221	7	1	1	1	195	22.4	10.18	2.63	1	0	0.752	0.752612	8.28	85.8	114.2	7.89		18778.3	34907.9		13444.4	1
678	P20795	Vacuolar protein sorting-associated protein 33	High	High	Peak Found	Not Found	High	0	3.998	2	1	2	1	691	79.2	5.29	4.38	1	0	2.484	0.760361	3.11	142.6	57.4	2.97		29962.5	51949.7	11534.8		1
707	P20049	Prephenate dehydrogenase	Peak Found	High	Peak Found	Peak Found	Medium	0.011	2.256	2	1	1	1	452	50.9	6.6	1.61	1	0	2.421	0.760361	103.35	141.5	58.5	84.32	8.94	16704.6	109786	12056.1	7438.55	1
953	P46992	Cell wall protein YJL171C	High	High	High	High	High	0	13.205	12	4	13	4	396	42.9	5.06	15.68	4	0	0.923	0.760361	108.72	128.2	71.8	3.19	31.27	893119	1.55345e+06	382952	326391	1
1430	P10962	Protein MAK16	High	High	High	High	High	0	5.478	8	2	6	2	306	35.7	5.25	11.41	2	0	0.842	0.760361	51.89	99.5	100.5	31.69	44.24	141460	371041	121453	126135	1
1456	P16120	Threonine synthase	Peak Found	High	Peak Found	Peak Found	High	0	4.393	4	2	2	2	514	57.4	5.64	2.07	2	0	0.739	0.760361	25.36	96.1	103.9	21.16	24.04	64095.7	78821.8	66293.7	25566.5	1
1525	P46367	Potassium-activated aldehyde dehydrogenase, mitochondrial	High	Peak Found	Peak Found	Peak Found	High	0	4.65	3	2	2	1	519	56.7	6.74	0	2	1	0.743	0.760361	67.97	89.4	110.6	14.83	66.95	44495.6	91307.8	34224.5	52059.2	1
254	P29055	Transcription initiation factor IIB	High	High	Peak Found	High	High	0	12.523	12	3	8	3	345	38.2	8.6	20.29	3	0	2.319	0.760973	96.06	194.8	5.2	21.6	57.49	6.55841e+06	1.48352e+07	125333	161479	1
770	P39522	Dihydroxy-acid dehydratase, mitochondrial	High	High	Peak Found	High	High	0	10.486	6	3	6	3	585	62.8	7.83	14.86	3	0	0.898	0.760973	95.58	138.2	61.8	14.13	37.31	280466	569775	99019.9	92406.7	1
1541	Q01519	Cytochrome c oxidase subunit 12, mitochondrial	High	Peak Found	High	Not Found	Medium	0.019	2.144	16	1	2	1	83	9.8	5.39	4.55	1	0	0.778	0.760973	2.42	87.5	112.5	2.31		74760.1	120302	88456.7		1
1555	P13134	Kexin	Not Found	Peak Found	Peak Found	High	High	0.001	3.171	1	1	1	1	814	89.9	4.98	1.79	1	0	0.744	0.760973	83.12	85.3	114.7		69.16		57284.6	25395.5	40230.7	1
1611	Q03281	Inner nuclear membrane protein HEH2	High	High	High	High	High	0	21.423	11	5	13	5	663	76.3	7.78	25.28	5	0	0.892	0.760973	44.19	74.6	125.4	40.57	0.04	139736	419195	295473	160718	1
523	P20449	ATP-dependent RNA helicase DBP5	High	High	High	High	High	0	26.613	18	7	13	7	482	53.8	7.43	32.49	7	0	2.316	0.761689	63.56	154.3	45.7	16.82	30.7	1.85915e+07	2.43397e+07	3.66502e+06	3.09723e+06	1
838	P16467	Pyruvate decarboxylase isozyme 2	High	High	High	High	High	0	47.153	13	7	79	5	563	61.9	6.43	222.72	7	0	2.313	0.762441	71.25	134.6	65.4	24.78	32.14	1.53835e+07	1.79495e+07	4.65237e+06	4.01716e+06	1
1225	P0CS90	Import motor subunit, mitochondrial	High	High	High	High	High	0	96.12	32	22	93	22	654	70.6	5.59	213.38	22	0	0.927	0.762441	129.71	113	87	4.96	17.61	7.20335e+06	1.28467e+07	4.74557e+06	3.31389e+06	1
462	P40078	Ribosome biogenesis protein NSA2	High	High	Peak Found	Peak Found	High	0	4.748	11	2	3	2	261	29.7	10.24	8.41	2	0	2.222	0.763363	53.2	159.1	40.9	1.77	52.44	388361	661991	64201.9	76045.5	1
1497	P28000	DNA-directed RNA polymerases I and III subunit RPAC2	High	High	High	High	High	0	11.588	19	2	7	2	142	16.1	4.41	19.93	2	0	0.903	0.764848	24.02	92.5	107.5	1.15	13.87	227324	384104	225800	149448	1
1305	P21954	Isocitrate dehydrogenase	High	High	High	High	High	0	18.113	21	7	10	7	428	48.2	8.76	17.47	7	0	0.897	0.766456	79.47	108.6	91.4	20.26	37.16	203200	450820	141201	131473	1
1417	P48353	Protein HLJ1	High	High	High	High	High	0	8.664	8	3	9	3	224	25	9.25	13.86	3	0	0.945	0.771115	93.39	100.1	99.9	3.45	31.48	428082	747246	326600	279231	1
1518	P25846	DNA mismatch repair protein MSH1, mitochondrial	Peak Found	Peak Found	High	Peak Found	High	0	4.897	2	2	2	2	959	109.3	8.73	3.89	2	0	0.775	0.771115	28.42	90.1	109.9	57.55	27.99	9825.39	38753.4	21129.1	7690.9	1
1552	P34247	U3 small nucleolar RNA-associated protein 11	High	High	High	High	High	0.004	2.744	4	1	4	1	250	29.7	10.18	9.46	1	0	0.752	0.772454	58.95	85.8	114.2	23.42	60.15	48229.2	57402.4	32261.9	43498.8	1
1366	P08678	Adenylate cyclase	Peak Found	High	Peak Found	Peak Found	High	0	4.712	1	2	2	2	2026	227.7	7.3	2.24	2	0	0.765	0.773624	24.45	104.2	95.8	69.41	17.13	12461.4	60655.2	16249.1	11268.8	1
630	P36139	Protein PET10	High	High	Peak Found	Peak Found	High	0	8.223	10	2	4	2	283	31.2	8.16	9.04	2	0	0.848	0.773645	102.32	145.9	54.1	5.87	135.08	205378	314238	451841	5637.74	1
699	P47124	Putative glycosyltransferase HOC1	High	High	High	High	High	0	10.24	8	4	10	4	396	46.3	8.1	22.21	4	0	2.288	0.773645	98.24	141.8	58.2	7.65	33.95	1.10505e+06	2.04725e+06	351001	311387	1
717	P29453	60S ribosomal protein L8-B	High	High	High	Peak Found	High	0	89.574	56	19	168	2	256	28.1	10.02	394.16	19	17	2.288	0.773645	124.27	141.1	58.9	12.11	49.78	8.89605e+07	1.24573e+08	2.20831e+07	2.5046e+07	1
1277	P38249	Eukaryotic translation initiation factor 3 subunit A	High	High	High	High	High	0	42.957	18	14	41	14	964	110.3	6.3	76.66	14	0	0.937	0.773645	69.34	110	90	4.71	30.76	2.08526e+06	3.70545e+06	1.3241e+06	1.11997e+06	1
1388	Q99207	Nucleolar complex protein 14	High	High	High	High	High	0	12.884	6	4	7	4	810	94.2	7.37	15.45	4	0	0.862	0.774204	56.76	102.7	97.3	22.58	34.88	161804	371207	131048	117897	1
711	P41835	Thiamine biosynthetic bifunctional enzyme	Peak Found	High	Peak Found	Peak Found	High	0.001	3.249	3	1	1	1	540	58	5.95	2.8	1	0	2.413	0.774393	42.88	141.4	58.6	18.45	44.29	64033.5	138393	20485	21292.1	1
871	Q12462	Peroxisomal membrane protein PMP27	High	High	High	High	High	0	8.999	14	3	6	3	236	26.9	9.83	11.66	3	0	2.236	0.774393	91.26	132.6	67.4	43.77	43.42	197949	624132	94380.8	96780.2	1
693	P07149	Fatty acid synthase subunit beta	High	High	High	High	High	0	332.044	42	67	347	67	2051	228.5	5.92	809.38	67	0	2.282	0.774631	104.39	141.9	58.1	1.69	28.44	7.14098e+07	1.21588e+08	2.2571e+07	1.84483e+07	1
636	P53221	60S ribosomal protein L26-B	High	High	High	High	High	0	29.288	49	8	48	8	127	14.2	10.46	101	8	0	0.942	0.777701	94.82	145.5	54.5	8.23	51.16	1.72444e+07	3.2213e+07	4.38899e+06	5.09057e+06	1
1204	P29295	Casein kinase I homolog HRR25	High	Peak Found	High	Peak Found	High	0	5.592	6	3	3	3	494	57.3	9.26	1.64	3	0	2.457	0.778774	45.98	114.2	85.8	31.98	18.12	73774.3	194322	57457.6	40417	1
1457	P35176	Peptidyl-prolyl cis-trans isomerase D	Peak Found	High	High	Peak Found	High	0	4.978	8	2	3	2	225	25.3	5.6	1.88	2	0	0.888	0.778774	74.65	95.9	104.1	32.14	40.98	155266	409949	147453	145565	1
1529	Q99216	Pre-rRNA-processing protein PNO1	High	High	High	High	High	0	6.422	11	3	4	3	274	30.3	9.07	5.32	3	0	0.889	0.778774	88.8	88.8	111.2	1.89	56.13	187625	303703	142696	179691	1
537	P32939	Ypt/Rab-type GTPase YPT7	High	High	High	Peak Found	High	0	26.063	41	6	16	6	208	23	4.93	45.35	6	0	2.271	0.779853	59.77	153.1	46.9	25.71	22.83	2.30466e+06	2.65273e+06	466759	351420	1
714	Q03558	NADPH dehydrogenase 2	High	High	Peak Found	Peak Found	High	0	5.028	3	1	2	1	400	45	6.57	5.67	1	0	2.399	0.779853	56.03	141.2	58.8	65.87	45.23	45921.6	209486	21310.5	22479.7	1
757	Q12522	Eukaryotic translation initiation factor 6	High	High	High	High	High	0	25.07	28	4	17	4	245	26.4	4.64	47.38	4	0	2.27	0.779853	48.98	138.6	61.4	10.58	19.63	1.18116e+06	1.69038e+06	394953	283903	1
809	P14832	Peptidyl-prolyl cis-trans isomerase	High	High	Peak Found	Peak Found	High	0.006	2.531	5	1	2	1	162	17.4	7.44	3.99	1	0	2.149	0.779853	40.84	136.5	63.5	1.82	38.01	439504	712115	143493	135349	1
738	Q12389	ATP-dependent RNA helicase DBP10	High	High	High	Peak Found	High	0	18.935	11	8	12	8	995	112.9	9.14	20.37	8	0	2.165	0.787614	69.38	139.7	60.3	4.19	36.97	296494	523002	94359	87613.6	1
722	P32342	Signal recognition particle subunit SRP21	High	Peak Found	High	Peak Found	Medium	0.026	1.912	5	1	2	1	167	18.4	10.39	3.6	1	0	2.365	0.788038	49.3	140.6	59.4	10.13	47.58	191014	275097	49585	54291.2	1
1447	P0CX34	40S ribosomal protein S30-B	High	High	High	High	High	0	6.829	17	2	8	2	63	7.1	11.68	12.68	2	0	0.952	0.791155	54.25	97.3	102.7	27.93	56.71	1.0194e+06	1.13573e+06	539009	685365	1
723	Q07381	Ribosome biogenesis protein TSR1	High	High	Not Found	Peak Found	High	0.01	2.386	1	1	2	1	788	90.7	5.74	4.66	1	0	2.368	0.791722	4.56	140.6	59.4	4.35		75527.7	133529		16741.6	1
1033	Q05791	Cell division cycle protein 123	Peak Found	High	High	High	High	0	6.125	8	3	4	3	360	41.8	4.78	5.89	3	0	2.424	0.792228	66.27	124.4	75.6	14.26	36.85	128024	260586	61724.8	57206.8	1
1261	P0CX55	40S ribosomal protein S18-A	High	High	High	High	High	0	38.898	54	9	74	9	146	17	10.27	185.59	9	0	0.954	0.793154	81.34	110.9	89.1	3.7	26.85	4.46445e+07	7.82099e+07	2.84419e+07	2.271e+07	1
1151	P27810	Alpha-1,2 mannosyltransferase KTR1	High	High	High	High	High	0	21.22	17	7	23	7	393	46	6.68	44.94	7	0	0.955	0.794635	71.79	117.6	82.4	9.76	21.49	711947	1.35913e+06	429088	316852	1
501	P40528	Protein SYG1	High	High	High	Peak Found	High	0	10.721	4	3	6	3	902	104.2	8.66	12.33	3	0	2.337	0.794909	35.43	156.7	43.3	5.16	39.58	213248	329578	39944.5	38592.2	1
681	P0CX32	40S ribosomal protein S24-B	High	High	High	High	High	0	30.712	30	8	46	8	135	15.3	10.51	100.3	8	0	0.958	0.794909	138.84	142.4	57.6	7.65	47.43	1.5866e+07	2.93964e+07	4.47803e+06	4.89109e+06	1
721	P35845	Oxysterol-binding protein homolog 1	Peak Found	High	Not Found	Peak Found	High	0.006	2.556	2	1	2	1	1188	135	5.57	2.34	1	0	2.375	0.794909	3.96	140.7	59.3	3.78		20889.6	36635.2		4598.76	1
727	P37291	Serine hydroxymethyltransferase, cytosolic	High	High	High	High	High	0	62.027	27	13	44	13	469	52.2	7.43	90.78	13	0	2.239	0.794909	98.27	140.3	59.7	6.41	6.8	4.84621e+06	7.35829e+06	1.75897e+06	1.05278e+06	1
789	P41811	Coatomer subunit beta'	High	High	Peak Found	High	High	0	8.075	4	3	8	3	889	99.4	4.74	15.66	3	0	0.865	0.794909	57.92	137.4	62.6	9.3	53.81	172027	250710	46002.5	55726	1
856	P0CX42	60S ribosomal protein L23-B	High	High	High	High	High	0	34.748	47	7	64	7	137	14.5	10.33	143.21	7	0	2.235	0.794909	100.25	133.3	66.7	5.4	28	8.44847e+06	1.51618e+07	3.36678e+06	2.73387e+06	1
898	P00950	Phosphoglycerate mutase 1	High	High	High	High	High	0	68.145	50	16	59	16	247	27.6	8.84	149.77	16	0	2.243	0.794909	67.98	131	69	8.07	45.46	1.46987e+07	2.17998e+07	4.90133e+06	5.18899e+06	1
1353	P38925	Manganese transporter SMF1	High	Peak Found	High	Peak Found	High	0	5.325	3	2	3	2	575	63.2	6.6	5.54	2	0	0.885	0.794909	43.42	105.1	94.9	33.97		161669	438726		95021	1
1510	P53276	U3 small nucleolar RNA-associated protein 8	Peak Found	High	High	Not Found	High	0	9.358	6	3	3	3	713	80.1	5.17	7.86	3	0	2.409	0.794909	0	91.1	108.9	31.48		51050.5	133484	71715.9		1
1524	Q12436	Zinc-regulated transporter 2	High	High	Peak Found	Peak Found	Medium	0.011	2.322	2	1	2	1	422	46.3	5.17	4.84	1	0	0.809	0.794909	38.62	89.5	110.5	3.94	36.59	78946.2	124143	68150.9	62911.3	1
1543	P32529	DNA-directed RNA polymerase I subunit RPA12	High	Peak Found	Peak Found	High	High	0.003	2.932	12	1	2	1	125	13.7	7.87	2.12	1	0	0.775	0.794909	62.27	87.3	112.7	6.68	56.99	48733	73716.3	36630.9	46797.2	1
1604	P31412	V-type proton ATPase subunit C	High	High	High	Peak Found	High	0	6.976	10	3	3	3	392	44.2	6.67	5.17	3	0	0.789	0.794909	47.43	76.1	123.9	64	6.29	14350.6	63307.1	37217.9	18511	1
735	P40024	ABC transporter ATP-binding protein ARB1	High	High	High	High	High	0	78.052	31	15	71	15	610	68.3	6.51	159.1	15	0	2.234	0.795154	86.74	139.8	60.2	19.33	33.99	5.92759e+06	1.29758e+07	2.14457e+06	1.90347e+06	1
623	P25808	ATP-dependent rRNA helicase SPB4	High	High	Peak Found	Peak Found	High	0	4.081	3	2	3	2	606	69.4	9.04	1.76	2	0	2.236	0.795199	71.15	146.5	53.5	0.18	4.1	49527.7	82556.4	16468.4	9487.01	1
902	P06738	Glycogen phosphorylase	High	High	High	High	High	0	22.977	8	6	16	6	902	103.2	5.62	32.37	6	0	2.119	0.796106	44.48	130.9	69.1	24.68	32.88	316220	748021	147229	128531	1
1321	P01119	Ras-like protein 1	High	High	High	High	High	0	13.4	15	4	14	3	309	34.3	5.38	29.17	4	1	0.935	0.796406	67.97	107.9	92.1	12.74	24.63	277897	385623	170111	131491	1
355	P32629	Mannan polymerase II complex ANP1 subunit	High	High	High	High	High	0	19.526	15	7	18	7	500	58.1	5.33	39.35	7	0	2.223	0.796581	134.55	169.4	30.6	87.5	6.51	3.80321e+06	1.48918e+06	326671	161957	1
402	P30624	Long-chain-fatty-acid--CoA ligase 1	High	High	Peak Found	Peak Found	High	0	11.374	7	3	6	3	700	77.8	7.62	11.79	3	0	2.321	0.796581	30.33	164.6	35.4	8.62	32.56	179836	337788	30422.6	26430.3	1
719	Q04062	26S proteasome regulatory subunit RPN9	High	High	Peak Found	Peak Found	High	0.01	2.377	3	1	2	1	393	45.8	5.78	4.09	1	0	2.386	0.796581	9.67	140.9	59.1	7.89	9.73	94630.6	140702	32780.8	20455.4	1
728	P32561	Histone deacetylase RPD3	Peak Found	High	Not Found	Peak Found	Medium	0.034	1.764	3	1	1	1	433	48.9	5.52	0	1	0	2.352	0.796581	10.02	140.3	59.7	9.54		84484.6	160780		19564.7	1
743	P32457	Cell division control protein 3	Peak Found	High	Peak Found	Not Found	High	0	3.841	3	1	1	1	520	60	5.48	3.17	1	0	2.295	0.796581	72.06	139.3	60.7	61.82		19191.3	81466.6	12508.5		1
1481	P46965	Signal peptidase complex subunit 1	High	High	High	Not Found	High	0.008	2.396	12	1	4	1	94	10.8	8.63	9.63	1	0	0.886	0.796581	32.26	94	106	30.07		173151	186922	147416		1
1527	P53259	Rhomboid protein 1, mitochondrial	Peak Found	High	Not Found	Peak Found	Medium	0.022	2.018	3	1	1	1	346	38.8	10.29	0	1	0	0.801	0.796581	7.47	89	111	7.12		9049.29	13602.8		5464.81	1
1533	P40562	ATP-dependent DNA helicase MPH1	Peak Found	High	Not Found	Peak Found	Medium	0.029	1.872	1	1	1	1	993	114	7.31	1.64	1	0	0.793	0.796581	33.46	88.4	111.6	31.14		6248.66	6639.44		3207.69	1
795	P38295	Medium-chain fatty acid ethyl ester synthase/esterase 2	High	High	High	High	High	0	19.515	12	6	11	6	451	51.2	7.8	22.81	6	0	0.969	0.798566	62.6	137.2	62.8	4.54	36.74	604221	942088	191999	177652	1
1249	P07257	Cytochrome b-c1 complex subunit 2, mitochondrial	High	High	High	High	High	0	55.987	45	15	42	15	368	40.5	7.96	91.02	15	0	0.969	0.798566	67.09	111.6	88.4	9.49	5.69	2.41191e+06	4.58663e+06	1.98963e+06	997966	1
1262	P25644	DNA topoisomerase 2-associated protein PAT1	High	High	High	High	High	0	13.197	6	4	7	4	796	88.5	7.39	11.09	4	0	0.885	0.798566	100.76	110.9	89.1	0.8	25.69	173791	292227	109463	85926	1
1399	Q02753	60S ribosomal protein L21-A	High	High	High	High	High	0	20.474	43	8	44	8	160	18.2	10.39	75.69	8	0	0.969	0.798566	100.46	101.3	98.7	10.45	57.2	2.80822e+07	4.02603e+07	1.54952e+07	1.98674e+07	1
418	P32908	Structural maintenance of chromosomes protein 1	High	High	Peak Found	Peak Found	High	0	3.971	2	2	2	2	1225	141.2	6.47	3.89	2	0	2.316	0.799165	3.69	162.3	37.7	7.19	3.55	80749.3	148634	18969.4	9807.2	1
1500	Q99383	Nuclear polyadenylated RNA-binding protein 4	High	High	High	Peak Found	High	0	4.477	2	1	4	1	534	59.6	5.66	8.04	1	0	0.858	0.799165	20.4	92.4	107.6	21.56	16.03	131316	160567	137675	59602.4	1
1523	Q12274	Uncharacterized protein YOR097C	Peak Found	Not Found	High	Peak Found	Medium	0.033	1.774	9	1	1	1	175	19.4	9.29	0	1	0	0.813	0.799165	43.19	89.7	110.3		39.55	10199.8		8815.16	8513.41	1
1720	P04819	DNA ligase 1	High	High	Peak Found	Peak Found	High	0	4.565	2	2	2	2	755	84.8	7.5	4.08	2	0	0.882	0.799165	79.27	18.3	181.7	83.56	45.99	73585.8	31461.1	247830	264596	1
1535	P22141	Proteasome subunit beta type-4	Peak Found	High	Peak Found	High	Medium	0.012	2.243	4	1	2	1	198	22.5	6.23	4.73	1	0	0.789	0.802016	51.86	88.2	111.8	68.04	59.7	22564.1	107076	28833.4	38576.4	1
394	P38250	Increased sodium tolerance protein 2	High	High	High	Peak Found	High	0	18.651	9	6	10	6	946	105.8	8.98	24.98	6	0	0.976	0.808433	72.5	165.1	34.9	6.09	22.84	738976	1.12715e+06	164718	64639.4	1
1274	P16861	ATP-dependent 6-phosphofructokinase subunit alpha	High	High	High	High	High	0	125.745	34	28	91	27	987	107.9	6.39	226.28	28	1	0.977	0.808511	128.76	110.2	89.8	12.05	16.45	8.97929e+06	1.25834e+07	5.60023e+06	3.84569e+06	1
1526	P38523	GrpE protein homolog, mitochondrial	Peak Found	High	High	High	High	0.001	3.034	4	1	3	1	228	26.1	8.24	6.43	1	0	0.805	0.808511	22.91	89.2	110.8	18.92	24.62	44890.2	97690.7	50069.6	38694	1
432	Q04305	U3 small nucleolar RNA-associated protein 15	High	High	High	High	High	0	11.599	8	3	10	3	513	57.7	9.31	18.74	3	0	2.209	0.810026	52.26	161.2	38.8	11.76	47.35	220619	433332	38118.5	41581.5	1
429	P38737	Proteasome component ECM29	High	High	Peak Found	Peak Found	High	0	4.667	1	2	2	2	1868	210.3	6.55	3.56	2	0	2.31	0.813801	70.61	161.4	38.6	13.1	58.62	29129.1	58318.8	4610.14	6054.6	1
782	P05750	40S ribosomal protein S3	High	High	High	High	High	0	72.547	62	13	121	13	240	26.5	9.41	274.1	13	0	0.982	0.813801	101.19	137.7	62.3	16.85	30.02	9.9858e+07	1.30669e+08	3.02401e+07	2.52995e+07	1
1245	P32465	Low-affinity glucose transporter HXT1	High	High	High	Peak Found	High	0	17.671	12	6	21	2	570	63.2	7.42	37.86	6	0	0.829	0.813801	61.09	111.8	88.2	10.1	11.62	123841	178434	92407.8	42604.5	1	Acetyl [N-Term]
1291	O74700	Mitochondrial import inner membrane translocase subunit TIM9	High	High	High	High	High	0	17.189	40	3	12	3	87	10.2	8.18	22.6	3	0	0.981	0.813801	41.54	109.3	90.7	27.71	31.1	1.34736e+06	3.33188e+06	1.02082e+06	867847	1
1486	P17967	Protein disulfide-isomerase	High	High	High	High	High	0	64.088	30	15	47	15	522	58.2	4.53	110.53	15	0	0.982	0.813801	135.88	93.4	106.6	7.14	27.35	2.29922e+06	3.45515e+06	2.8419e+06	1.04425e+06	1
1472	P04039	Cytochrome c oxidase subunit 8, mitochondrial	Peak Found	High	Peak Found	High	High	0.001	3.586	13	1	2	1	78	8.9	10.4	2.59	1	0	0.904	0.813927	71.6	94.9	105.1	72.02	28.33	85323.5	436235	126511	103229	1
1522	P16387	Pyruvate dehydrogenase E1 component subunit alpha, mitochondrial	Not Found	Peak Found	High	High	High	0	3.948	2	1	2	1	420	46.3	8.1	5.29	1	0	0.817	0.814142	36.16	89.9	110.1		33.51		105641	57189	50395.6	1
505	P15646	rRNA 2'-O-methyltransferase fibrillarin	High	High	High	High	High	0	30.719	30	8	30	8	327	34.4	10.24	64.12	8	0	2.18	0.814329	89.9	156.4	43.6	15.48	18.27	2.07408e+06	2.76783e+06	426136	300395	1
649	P53629	Sterol O-acyltransferase 2	High	High	High	Peak Found	High	0	7.272	4	3	5	3	642	74	7.72	10.74	3	0	0.984	0.814329	125.72	144.4	55.6	19.68	45.25	1.04221e+06	1.3093e+06	234684	247628	1
1210	Q07451	Endoplasmic reticulum transmembrane protein 3	High	High	High	High	High	0	17.529	20	4	11	4	203	22.9	7.14	25.99	4	0	0.984	0.814329	127.98	114	86	16.31	47.58	525213	1.10089e+06	293606	321464	1
672	P36000	AP-1 complex subunit beta-1	High	High	High	Peak Found	High	0	9.06	5	3	5	3	726	81.8	5.24	11.89	3	0	2.382	0.81437	49.56	143.1	56.9	23.01	45.41	81946.4	189181	25802.4	27293.8	1
1354	P36018	GTP-binding protein YPT52	High	High	High	High	High	0	22.564	35	7	18	6	234	26.1	4.82	32.99	7	1	0.985	0.81437	61.83	105.1	94.9	6.68	28.06	824381	1.50654e+06	597409	485562	1
1443	Q01852	Mitochondrial import inner membrane translocase subunit TIM44	High	High	High	High	High	0	29.031	23	8	19	8	431	48.8	9.44	41.41	8	0	0.985	0.81437	49.35	97.6	102.4	37.73	7.37	355527	1.02118e+06	435570	262819	1
720	P05748	60S ribosomal protein L15-A	High	High	High	High	High	0	33.529	38	8	78	2	204	24.4	11.39	146.96	8	6	2.176	0.814767	93.71	140.8	59.2	3.7	50.59	3.54251e+07	6.20624e+07	9.83642e+06	1.1304e+07	1
731	P32327	Pyruvate carboxylase 2	High	High	High	High	High	0	29.774	8	8	15	8	1180	130.1	6.51	36.65	8	0	2.175	0.814767	68.78	140	60	8.05	35.42	790925	1.47357e+06	259881	235693	1
618	P40531	Protein GVP36	High	High	High	High	High	0	7.309	6	2	6	2	326	36.6	4.97	12.15	2	0	2.173	0.815815	23.83	146.6	53.4	18.98	18.73	202039	440059	68959.2	48938	1
715	P54781	C-22 sterol desaturase ERG5	High	High	High	High	High	0	31.82	17	10	36	10	538	61.3	7.91	49.96	10	0	2.173	0.815815	111.98	141.2	58.8	2.87	27.92	2.91299e+06	4.65043e+06	1.3597e+06	495399	1
1106	P32915	Protein transport protein SEC61	High	High	High	High	High	0	8.486	6	3	8	3	480	52.9	9.35	17.33	3	0	0.988	0.816055	84.31	120.6	79.4	3.93	48.26	1.13509e+06	1.78519e+06	476448	527385	1
326	P00958	Methionine--tRNA ligase, cytoplasmic	High	High	High	Peak Found	High	0	15.994	9	6	13	6	751	85.6	6.61	29.27	6	0	2.107	0.816465	48.6	174.8	25.2	64.8	17.47	354857	1.58792e+06	89087.6	37782	1
1013	P30771	ATP-dependent helicase NAM7	High	High	High	Peak Found	High	0	7.073	3	2	5	2	971	109.4	6.48	13.47	2	0	0.849	0.817319	64.17	125.1	74.9	22.2	57.56	87262	199091	88328	20236.1	1
804	P54861	Dynamin-related protein DNM1	Peak Found	High	Peak Found	Not Found	High	0.003	2.926	2	1	1	1	757	84.9	5.52	2.43	1	0	2.161	0.817726	79.98	136.7	63.3	67.14		21910.2	102277	15905.1		1
993	P47054	Nucleoporin NUP192	Peak Found	High	Peak Found	Not Found	High	0	9.819	2	3	3	3	1683	191.4	5.35	7.2	3	0	0.816	0.817726	27.29	126.3	73.7	103.07		17098.7	181213	23566.1		1
1503	Q12082	Uncharacterized protein YDL157C, mitochondrial	Peak Found	High	High	High	High	0.004	2.901	8	1	3	1	118	13.6	9.38	5.78	1	0	0.848	0.818395	26.33	91.8	108.2	28.67	30.14	82923.2	207977	90587.2	75920.9	1
758	P36029	Polyamine transporter TPO5	Peak Found	High	Not Found	Peak Found	High	0.001	3.087	2	1	1	1	618	69.2	5.35	1.97	1	0	2.256	0.820157	21.51	138.6	61.4	20.31		36728.2	45728.7		7171.94	1
970	P20447	ATP-dependent RNA helicase DBP3	High	High	High	High	High	0	35.782	20	9	31	9	523	58.8	9.13	73.05	9	0	0.994	0.820817	66.55	127.5	72.5	9.18	38.23	1.6802e+06	2.45282e+06	635645	601635	1
1181	P46982	Alpha-1,2-mannosyltransferase MNN5	High	High	High	High	High	0	20.019	14	6	21	6	586	67.2	6.87	40.9	6	0	0.994	0.820817	104.95	115.7	84.3	17.91	17.95	1.02712e+06	2.20276e+06	700543	491552	1
1250	P07213	Mitochondrial import receptor subunit TOM70	High	High	High	High	High	0	69.249	34	17	48	17	617	70.1	5.35	105.06	17	0	0.994	0.820817	81.41	111.5	88.5	1.19	3.97	1.83344e+06	2.99709e+06	1.38836e+06	713519	1
1513	P36164	Golgi apparatus membrane protein TVP38	Peak Found	Peak Found	High	Peak Found	Medium	0.019	2.14	2	1	1	1	337	38.3	6.3	1.6	1	0	0.836	0.820817	61.2	91	109	41.24	68.85	56948.4	172627	50622	79741.4	1
1515	P38202	UPF0642 protein YBL028C	Peak Found	High	Peak Found	Peak Found	Medium	0.019	2.152	7	1	1	1	106	12.4	10.18	1.61	1	0	0.827	0.820817	30.13	90.5	109.5	34.32	28.97	41943.4	114420	49401.9	40691.5	1
662	P40015	Inositol phosphosphingolipids phospholipase C	High	High	High	Peak Found	High	0	19.456	14	6	9	6	477	53.9	7.53	18.74	6	0	2.077	0.821608	45.74	143.6	56.4	26.09	31.22	266869	644382	147891	51318.3	1
1156	P38625	GMP synthase	High	High	High	High	High	0	25.127	16	8	22	8	525	58.4	6.49	48.54	8	0	0.996	0.823134	89.97	117.3	82.7	2.45	39.18	3.15284e+06	5.42649e+06	1.59332e+06	1.53004e+06	1
398	Q08235	Ribosome biogenesis protein BRX1	High	High	High	Peak Found	High	0	11.881	16	4	7	4	291	33.5	9.29	17.38	4	0	2.151	0.82366	67.69	164.7	35.3	19.59	79.58	1.38241e+06	1.73916e+06	127590	247861	1
1157	P40055	U3 small nucleolar RNA-associated protein 7	Peak Found	High	High	Peak Found	High	0	5.109	6	2	2	2	554	62.3	9.45	5.22	2	0	0.821	0.82366	48.06	117.2	82.8	37.54	45.06	21075.7	60365	13147.1	13831.4	1
765	Q00684	Tyrosine-protein phosphatase CDC14	Peak Found	High	Peak Found	Peak Found	High	0.001	3.693	2	1	1	1	551	61.9	7.97	2.91	1	0	2.245	0.826295	19.44	138.4	61.6	17.02	20.71	20875.6	44205.1	8478.14	6190.13	1
1290	P32565	26S proteasome regulatory subunit RPN2	High	High	High	High	High	0	29.295	11	11	28	11	945	104.2	6.18	53.88	11	0	0.999	0.826295	63.45	109.4	90.6	14.32	41.03	5.75385e+06	7.80657e+06	2.99217e+06	2.95639e+06	1
1383	P39077	T-complex protein 1 subunit gamma	High	High	High	High	High	0	68.507	36	21	67	21	534	58.8	6.11	147.58	21	0	1	0.826433	110.57	103.1	96.9	1.99	29.13	5.18653e+06	8.38319e+06	3.6494e+06	3.0131e+06	1
611	P31382	Dolichyl-phosphate-mannose--protein mannosyltransferase 2	High	High	High	High	High	0	33.546	13	8	35	7	759	86.8	7.71	79.76	8	1	2.144	0.827045	99.51	147	53	4.52	2.03	2.25234e+06	3.99193e+06	773385	432672	1
810	P25568	Autophagy-related protein 22	High	Peak Found	Not Found	Peak Found	Medium	0.011	2.255	3	1	1	1	528	58.8	8.41	2.35	1	0	2.146	0.827186	3.37	136.4	63.6	3.21		44667.2	77714.3		10839.1	1
1000	P39692	Sulfite reductase	High	High	High	High	High	0	73.065	24	19	43	19	1035	114.8	5.27	104.92	19	0	1.002	0.827924	104.95	125.8	74.2	6.61	16.53	2.69647e+06	4.92241e+06	1.75458e+06	754246	1
1420	P07170	Adenylate kinase	High	High	High	High	High	0	5.307	9	2	5	2	222	24.2	6.42	11.83	2	0	0.924	0.827924	65.1	100	100	23.87	39.28	139971	327195	116832	112366	1
1473	P07278	cAMP-dependent protein kinase regulatory subunit	Peak Found	High	Peak Found	High	High	0	7.205	7	3	3	3	416	47.2	7.94	4.12	3	0	0.963	0.827924	57.61	94.9	105.1	22.47	50.27	170256	390019	142883	163357	1
1680	P17064	Purine-cytosine permease FCY2	High	Peak Found	High	High	High	0	8.792	4	3	6	3	533	58.2	5.21	10.2	3	0	0.864	0.833335	62.36	48.1	151.9	62.24	57.13	78218.2	50555.2	93842.5	120164	1
341	P40160	Serine/threonine-protein kinase RIO2	Peak Found	High	Not Found	Peak Found	High	0	6.712	6	2	2	2	425	49.1	5.29	4.92	2	0	0.833	0.833888	48.28	171.7	28.3	10.72		88775.5	126787		6916.4	1
773	P32336	Protein NUD1	High	High	Peak Found	Peak Found	Medium	0.014	2.197	2	1	2	1	851	94	7.03	2.23	1	0	2.23	0.833888	53.67	138.1	61.9	1.28	48.53	19980.9	33824.5	5921.17	6581.91	1
836	P39925	Mitochondrial respiratory chain complexes assembly protein AFG3	High	High	High	Peak Found	High	0	15.109	7	4	9	3	761	84.5	9.16	22.59	4	1	2.004	0.833888	75.42	134.8	65.2	18.56	43.01	476295	608139	138196	140804	1
935	P39003	High-affinity hexose transporter HXT6	Peak Found	Peak Found	Peak Found	High	High	0	38.124	21	9	41	1	570	62.7	7.75	90.92	9	7	1.009	0.833888	88.85	129.1	70.9	1.46	33.04	5.76166e+06	9.77838e+06	2.35904e+06	2.0643e+06	1
1025	P38225	Very long-chain fatty acid transport protein	High	High	Peak Found	Peak Found	High	0	4.457	3	2	2	2	669	77.1	8.35	4.1	2	0	0.834	0.833888	77.97	124.8	75.2	0.73	65.82	60659.9	101891	20759	30938.1	1
1463	P53112	Peroxisomal membrane protein PEX14	High	High	High	High	High	0	16.339	21	6	12	6	341	38.4	4.88	27.45	6	0	0.991	0.833888	73.97	95.4	104.6	2.44	0.25	284373	489350	296682	161863	1
1502	P36044	Protein MNN4	High	Peak Found	High	High	Medium	0.014	2.2	1	1	3	1	1178	139.3	6.49	3.66	1	0	0.851	0.833888	24.86	92	108	15.93	26.1	32479.7	43067.5	26470.7	20904.1	1
478	P36013	NAD-dependent malic enzyme, mitochondrial	High	High	High	Peak Found	High	0	34.722	21	9	14	9	669	74.3	8.18	35.07	9	0	1.01	0.834219	30.85	158.1	41.9	10.76	19.72	745429	1.06403e+06	149105	107327	1
579	Q07844	Ribosome biogenesis ATPase RIX7	High	High	Peak Found	High	High	0	12.299	5	4	6	4	837	93	5.36	14.49	4	0	2.026	0.834219	78.94	150.3	49.7	11.84	3.21	333410	655581	109738	62426.6	1
781	P38777	Family of serine hydrolases 1	Not Found	High	Peak Found	Not Found	High	0	3.809	7	1	1	1	243	27.3	6.35	2.8	1	0	2.216	0.834219	0	137.8	62.2				37854.6	9619.21		1
1415	P50077	Calcium-channel protein CCH1	High	Peak Found	High	High	Medium	0.035	1.75	0	1	4	1	2039	234.4	8.41	0	1	0	1.011	0.834219	60.75	100.5	99.5	19.49	60.23	1.31236e+06	1.65321e+06	671464	906594	1
1454	P34167	Eukaryotic translation initiation factor 4B	High	High	High	High	High	0	20.254	19	7	14	7	436	48.5	5.29	19.93	7	0	0.999	0.834219	88.32	96.2	103.8	23.13	36.75	309677	716176	283048	261914	1
1212	Q02354	U3 small nucleolar RNA-associated protein 6	High	High	High	High	High	0	10.769	7	4	6	4	440	52.4	8.97	10.71	4	0	0.925	0.834258	36.75	113.8	86.2	4.83	25.43	153556	238432	87746.6	68621.8	1
577	Q04958	Lysophospholipase NTE1	High	High	High	High	High	0	21.211	6	8	12	8	1679	187	8.1	24.14	8	0	1.012	0.835403	113.55	150.5	49.5	7.09	37.48	736287	1.1073e+06	164476	153906	1
467	Q03441	Sporulation protein RMD1	Peak Found	High	Peak Found	Peak Found	High	0.001	3.62	4	2	2	2	430	49.9	5.66	1.95	2	0	2.166	0.837076	38.27	158.7	41.3	22	41.76	72392	164696	15217	15205.4	1
1367	P38221	Phosphatidate cytidylyltransferase	High	High	High	High	High	0	9.848	6	3	11	3	457	51.8	8.57	24.81	3	0	1.014	0.837076	71.55	104.2	95.8	4.06	9.15	706051	1.10832e+06	552937	342207	1
1391	Q03707	Inner nuclear membrane protein SRC1	High	High	Peak Found	Peak Found	High	0	6.659	5	3	3	3	834	95.4	5.6	4.52	3	0	0.86	0.837076	60.89	102.4	97.6	5.08	18.71	105567	188576	85420.9	60597.1	1
1507	P40302	Proteasome subunit alpha type-6	High	High	High	High	High	0	19.435	24	5	14	5	234	25.6	7.39	30.12	5	0	2.116	0.837076	70.41	91.2	108.8	18.23	45.65	888733	1.91484e+06	808085	858122	1
574	P41810	Coatomer subunit beta	High	High	High	High	High	0	20.781	8	7	17	7	973	109	5.64	39.17	7	0	2.112	0.837784	64.61	150.8	49.2	9.12	8.93	788274	1.49129e+06	241356	148890	1
805	Q07914	Mitochondrial import inner membrane translocase subunit TIM14	High	High	High	Not Found	High	0	5.179	9	1	4	1	168	17.9	9.5	11.62	1	0	2.161	0.837784	33.52	136.7	63.3	31.19		243068	258075	84145.9		1
1491	P38902	DNA-directed RNA polymerase II subunit RPB11	High	Peak Found	Peak Found	Peak Found	High	0.01	2.385	6	1	1	1	120	13.6	5.57	0	1	0	0.868	0.837784	35.27	93	107	43.02	43.8	6783.26	21137.9	7269.96	7498.41	1
1539	P42949	Mitochondrial import inner membrane translocase subunit TIM16	High	High	High	High	High	0	13.703	27	4	11	4	149	16.2	9.44	19.61	4	0	1	0.837784	56.96	87.7	112.3	18.57	16.94	259282	561359	314829	217720	1
816	P36112	MICOS complex subunit MIC60	High	High	High	High	High	0	62.352	37	16	42	16	540	61	6.6	109.19	16	0	2.109	0.838429	101.72	136.1	63.9	1.91	10.89	1.34002e+06	2.2887e+06	553183	350917	1
790	P53198	Protein ERP6	High	Peak Found	Peak Found	Peak Found	High	0.01	2.35	5	1	1	1	216	25.3	6.55	1.86	1	0	2.193	0.838622	94.93	137.4	62.6	3.46	77.58	32329.9	51181.1	7272.84	13563.9	1
787	P53011	Nucleoporin SEH1	High	Not Found	Not Found	Peak Found	High	0.001	3.153	3	1	1	1	349	39.1	5.57	2.51	1	0	2.2	0.839242	0	137.5	62.5			37097			8581.19	1
1411	Q08984	Uncharacterized protein YPL272C	High	High	High	High	High	0	18.311	11	4	13	4	517	59.4	6	33.56	4	0	1	0.839242	41.9	100.7	99.3	4.33	40.56	340766	602341	241364	236728	1
1408	P25574	ER membrane protein complex subunit 1	High	High	High	High	High	0	20.885	7	5	14	5	760	87.1	5.35	31.44	5	0	2.103	0.839495	70.67	100.9	99.1	9.3	44.05	3.10729e+06	5.89337e+06	2.21e+06	2.28845e+06	1
1483	P32831	Negative growth regulatory protein NGR1	Peak Found	High	Peak Found	Peak Found	Medium	0.022	2.034	1	1	1	1	672	75	8.13	1.83	1	0	0.882	0.839495	52.13	93.7	106.3	71.22	73.82	7412.42	37330.4	24432.9	4171.49	1
408	P53752	Uncharacterized membrane glycoprotein YNR066C	High	High	Peak Found	Peak Found	High	0	10.623	7	2	4	2	436	49.6	5.1	8.36	2	0	2.157	0.839582	86.06	163.5	36.5	0.5	122.69	82366.4	135969	64489.5	2486.55	1
1172	Q12452	3-keto-steroid reductase ERG27	High	High	High	High	High	0	19.532	21	7	15	7	347	39.7	8.32	26.36	7	0	1.022	0.839634	111.51	116.3	83.7	10.75	45.45	1.35592e+06	1.93575e+06	606217	641685	1
1278	P32466	Low-affinity glucose transporter HXT3	High	High	High	High	High	0	27.633	16	7	40	4	567	62.5	7.08	88.69	7	1	1.021	0.839634	47.33	110	90	3.77	26.99	6.22709e+06	9.81494e+06	3.82587e+06	3.06085e+06	1	Acetyl [N-Term]
1328	P47127	Altered inheritance of mitochondria protein 24, mitochondrial	High	High	Not Found	Peak Found	High	0	7.014	8	2	3	2	394	44.4	9.8	8.22	2	0	0.857	0.839634	29.42	107.5	92.5	15.09		60783.4	125188		29653.6	1
1448	P08456	CDP-diacylglycerol--serine O-phosphatidyltransferase	Not Found	Peak Found	Peak Found	High	High	0.01	2.384	4	1	1	1	276	30.8	6.27	1.91	1	0	0.946	0.839634	29.42	97.2	102.8		27.52		219667	107375	86583.3	1
385	Q03455	Probable zinc transporter MSC2	High	High	Peak Found	Peak Found	High	0	5.36	4	2	2	2	724	80.5	7.77	3.75	2	0	2.185	0.83992	56.6	166.2	33.8	7.67	56.21	126525	188710	14970.3	18876	1
387	P48164	40S ribosomal protein S7-B	High	High	High	High	High	0	53.328	59	11	74	6	190	21.6	9.92	188.56	11	0	2.094	0.83992	111.82	166.1	33.9	2.79	110.45	1.04385e+07	1.66828e+07	5.57764e+06	372827	1
766	P25349	Flavoprotein-like protein YCP4	High	High	Peak Found	High	High	0	12.569	19	4	12	4	247	26.3	8.19	24.33	4	0	2.094	0.83992	55.78	138.4	61.6	8.82	45.06	2.09752e+06	3.0776e+06	589808	620530	1
808	P06115	Catalase T	Peak Found	High	Peak Found	Peak Found	High	0.007	2.475	2	1	1	1	562	64.5	6.54	2.31	1	0	2.155	0.83992	21.38	136.6	63.4	3.26	20.65	125702	218841	48242.4	35192.8	1
824	P39002	Long-chain-fatty-acid--CoA ligase 3	High	High	Peak Found	Peak Found	High	0	6.423	3	2	12	1	694	77.9	9	25.59	2	0	2.094	0.83992	42.19	135.4	64.6	10.46	41.44	1.39126e+06	2.68239e+06	495399	492544	1
963	P32867	Protein SSO1	High	High	High	High	High	0	12.53	17	3	15	3	290	33.1	5.3	29.4	3	0	2.094	0.83992	62.69	127.8	72.2	0.36	35.17	778251	1.28722e+06	318533	287782	1
1102	P27614	Carboxypeptidase S	High	High	High	High	High	0	12.036	8	4	6	4	576	64.6	5.53	9.81	4	0	0.988	0.83992	42.19	120.9	79.1	30.68	61.57	353903	378615	109120	150795	1
597	Q02608	37S ribosomal protein S16, mitochondrial	High	High	Peak Found	Peak Found	High	0	3.833	22	2	2	2	121	13.6	10.4	1.65	2	0	2.176	0.844099	10.05	148.6	51.4	0.95	23.57	90519.1	148485	34458.9	13381.2	1
337	P22202	Heat shock protein SSA4	High	High	High	High	High	0	84.523	30	16	129	6	642	69.6	5.14	352.29	16	0	1.032	0.848812	106.62	172.4	27.6	60.88	30.76	2.64194e+06	1.74866e+06	311476	108834	1
694	P00359	Glyceraldehyde-3-phosphate dehydrogenase 3	High	High	High	High	High	0	58.512	49	15	81	6	332	35.7	6.96	169.4	15	7	2.077	0.848812	111.26	141.9	58.1	19.8	47.44	4.57814e+07	1.00896e+08	1.42375e+07	1.55541e+07	1
803	P32527	Zuotin	High	High	Peak Found	High	High	0	24.063	17	5	11	5	433	49	8.25	27.89	5	0	1.974	0.848812	31.05	136.8	63.2	26.01	28.52	356802	860612	151639	124091	1
844	P40094	Conserved oligomeric Golgi complex subunit 3	High	Peak Found	Peak Found	Peak Found	High	0.006	2.529	1	1	1	1	801	92.5	5.45	1.61	1	0	2.039	0.848812	79.84	134.2	65.8	3.95	68.51	37831.3	66512.7	10527.7	16480	1
944	P04912	Histone H2A.2	High	High	High	Peak Found	High	0	11.269	30	3	12	2	132	14	10.67	24.16	3	0	1.034	0.848812	87.73	128.5	71.5	20.56	36.98	2.80512e+06	6.25029e+06	1.29579e+06	1.20327e+06	1
1085	P32795	Mitochondrial inner membrane i-AAA protease supercomplex subunit YME1	High	High	High	High	High	0	43.233	19	12	29	12	747	81.7	7.08	65.51	12	0	1.031	0.848812	87.98	121.8	78.2	7.03	26.97	1.55608e+06	2.34215e+06	733328	586580	1
1112	Q12442	ADIPOR-like receptor IZH2	High	High	High	High	High	0	9.972	10	3	9	3	317	36.3	8.81	17.26	3	0	1.034	0.848812	103.95	120.2	79.8	2.9	2.39	514676	891467	331924	174452	1
1182	P38199	Heterogeneous nuclear rnp K-like protein 2	High	High	High	High	High	0	10.733	10	4	7	4	381	41.7	6.06	7.99	4	0	0.877	0.848812	43.56	115.7	84.3	6.59	35.77	108109	197308	100072	32437.3	1
1198	P10592	Heat shock protein SSA2	High	High	High	High	High	0	279.709	69	44	387	13	639	69.4	5.06	1043.15	44	33	1.034	0.848812	130.7	114.6	85.4	9.49	9.74	1.09349e+08	1.58928e+08	6.65667e+07	4.15402e+07	1
1498	P53378	Tubulin gamma chain	Peak Found	High	High	Peak Found	High	0.006	2.627	4	1	2	1	473	52.6	4.74	5.59	1	0	0.86	0.848812	12.1	92.5	107.5	9.17	12.27	27547.2	52150.7	29339.9	18980.2	1
1494	P25361	Uncharacterized protein YCR043C	Peak Found	High	High	Not Found	Medium	0.022	2.043	9	1	2	1	127	14.8	5.47	3.81	1	0	0.864	0.851826	6.07	92.7	107.3	5.78		21568.9	33041.9	22439.2		1
1014	P00410	Cytochrome c oxidase subunit 2	High	High	High	High	High	0	6.703	11	2	6	2	251	28.5	4.58	15.52	2	0	1.047	0.853303	45.58	125.1	74.9	16.06	55.87	554407	733740	182474	228765	1
322	P36034	Protein COS9	High	High	Peak Found	Peak Found	High	0	3.99	5	2	4	2	407	48.5	8.65	7.59	2	0	2.193	0.853506	86.57	175.4	24.6	7.83	79.74	104592	194285	7681.86	14972.9	1
682	P07172	Histidinol-phosphate aminotransferase	High	High	High	Peak Found	High	0	11.123	15	4	6	4	385	42.6	6.43	14.35	4	0	1.985	0.854357	32.22	142.4	57.6	7.22	19.33	304660	561041	105740	75690.8	1
609	P07806	Valine--tRNA ligase, mitochondrial	High	High	Peak Found	Peak Found	High	0	13.261	5	4	6	4	1104	125.7	6.96	14.88	4	0	2.056	0.85645	44.17	147.4	52.6	8.83	15.38	242171	355293	68190.6	46120	1
869	P05737	60S ribosomal protein L7-A	High	Peak Found	High	High	High	0	60.897	47	13	115	1	244	27.6	10.15	327.87	13	12	2.063	0.85645	136.63	132.7	67.3	2.53	44.5	3.87601e+07	6.21786e+07	1.30482e+07	1.36063e+07	1
1140	P06105	Protein SCP160	High	High	High	High	High	0	73.307	20	23	51	23	1222	134.7	5.85	99.95	23	0	1.042	0.85645	70.2	118.4	81.6	7.14	32.14	6.79124e+06	1.24909e+07	3.65619e+06	3.15697e+06	1
1255	P25623	Suppressor of yeast profilin deletion	High	High	High	High	High	0	25.519	14	9	14	9	870	96.1	8.59	24.64	9	0	2.05	0.85645	72.33	111.1	88.9	14.43	21.6	404983	826257	288022	213016	1
1384	P04802	Aspartate--tRNA ligase, cytoplasmic	High	High	High	High	High	0	20.81	15	6	14	6	557	63.5	6.58	26.69	6	0	1.943	0.85645	64.91	103.1	96.9	12.82	3.55	386719	536062	302841	173106	1
1562	P48439	Dolichyl-diphosphooligosaccharide--protein glycosyltransferase subunit 3	High	High	High	High	High	0	5.654	6	2	6	2	350	39.5	8.48	8.46	2	0	1.042	0.85645	95.81	82.9	117.1	33.72	47.27	1.20728e+06	1.23425e+06	883898	963071	1
584	Q04458	Fatty aldehyde dehydrogenase HFD1	High	High	High	High	High	0	11.326	6	3	11	3	532	59.9	6.76	23.99	3	0	1.956	0.859262	56.32	149.7	50.3	3.88	55.15	492037	864126	105418	130573	1
850	P48361	Activator of SKN7 protein 10	High	High	Peak Found	Peak Found	Medium	0.023	1.981	1	1	2	1	1146	126.8	9.29	4.63	1	0	2.014	0.859262	18.06	133.6	66.4	19.53	18.99	43472.8	95430.7	20287.4	14451	1
945	P33892	eIF-2-alpha kinase activator GCN1	High	High	High	High	High	0	116.207	15	34	67	34	2672	296.5	5.27	143.58	34	0	1.045	0.859262	85.35	128.5	71.5	5.85	29.11	3.15742e+06	5.70223e+06	1.39021e+06	1.1476e+06	1
1248	P12695	Dihydrolipoyllysine-residue acetyltransferase component of pyruvate dehydrogenase complex, mitochondrial	High	High	High	High	High	0	37.551	19	8	25	8	482	51.8	7.8	56.94	8	0	1.044	0.859262	77.01	111.7	88.3	4.55	17.87	2.83385e+06	4.41772e+06	1.78787e+06	1.25313e+06	1
1312	P39935	Eukaryotic initiation factor 4F subunit p150	High	High	High	High	High	0	23.482	9	7	19	6	952	107	6.04	36.28	7	1	1.045	0.859262	75.82	108.4	91.6	14.35	29.04	697464	945896	404704	333693	1
1487	P38857	Mitochondrial pyruvate carrier 2	Peak Found	High	Not Found	Peak Found	High	0.004	2.814	7	1	1	1	129	14.5	10.33	2.3	1	0	0.874	0.859262	34.97	93.3	106.7	32.46		47645.7	49636.6		21958	1
1493	P53622	Coatomer subunit alpha	High	High	High	High	High	0	11.677	5	5	10	5	1201	135.5	5.99	21.89	5	0	0.967	0.859262	88.56	92.9	107.1	23.17	26.7	114835	265738	120691	96155.5	1
924	P38875	GPI transamidase component GPI16	High	High	High	High	High	0	9.592	9	4	9	4	610	68.7	5.31	10.92	4	0	1.939	0.860064	97.11	129.9	70.1	20.57	31	371286	827357	173748	147500	1
403	P02309	Histone H4	High	High	High	High	High	0	17.911	40	5	20	5	103	11.4	11.36	42	5	0	2.045	0.861558	86.1	164.2	35.8	33.5	14.2	3.53452e+06	9.52495e+06	1.0172e+06	452060	1
994	Q12179	Uncharacterized protein YPL245W	High	High	High	High	High	0	12.123	12	4	10	4	454	52.2	9.01	20.55	4	0	0.965	0.861558	40.03	126.3	73.7	9.06	35.39	152396	288052	68734	62312.8	1
747	P10964	DNA-directed RNA polymerase I subunit RPA190	High	High	High	Peak Found	High	0	31.845	8	10	18	9	1664	186.3	7.08	39.02	10	1	2.043	0.861637	64.61	139.1	60.9	7.38	38.77	737596	1.10471e+06	216715	206813	1
817	Q02792	5'-3' exoribonuclease 2	Peak Found	High	Not Found	Peak Found	Medium	0.031	1.827	1	1	1	1	1006	115.9	6.81	1.94	1	0	2.129	0.861637	26.16	136.1	63.9	24.57		16336.2	38582.2		4655.62	1
966	P46956	Inorganic phosphate transporter PHO86	High	High	High	High	High	0	15.079	14	4	10	4	311	34.9	9.61	26.32	4	0	1.013	0.861637	74.88	127.7	72.3	26.41	17.77	348817	397417	134938	94436.8	1
825	P53742	Nucleolar GTP-binding protein 2	High	High	High	High	High	0	48.001	30	14	44	14	486	55.5	9.5	98.31	14	0	2.041	0.86181	51.73	135.4	64.6	4.5	21.66	2.82003e+06	4.99654e+06	1.11388e+06	824584	1
1550	P32379	Proteasome subunit alpha type-5	High	High	High	High	High	0	16.641	21	5	9	5	260	28.6	4.73	20.78	5	0	1.031	0.86181	55.96	85.9	114.1	68.84	53.52	528725	303458	259297	312634	1
1488	P41920	Ran-specific GTPase-activating protein 1	High	Peak Found	Peak Found	Not Found	Medium	0.037	1.717	10	1	1	1	201	22.9	6.1	3	1	0	0.874	0.862613	35.07	93.3	106.7	32.56		25690.1	68255.4	34792.2		1
1359	P10823	Guanine nucleotide-binding protein alpha-2 subunit	High	High	High	High	High	0	11.733	10	4	8	4	449	50.4	6.46	14.97	4	0	0.963	0.87137	63.01	104.8	95.2	31.56	48.44	98562.4	258011	73585.2	81685.4	1
444	P36101	tRNA threonylcarbamoyladenosine dehydratase 2	High	High	High	High	High	0	40.532	25	9	28	9	447	50.2	8.78	69.52	9	0	2.028	0.872524	96.44	160.3	39.7	5.52	26.16	1.23564e+06	2.22121e+06	359558	134442	1
487	Q3E7Y3	40S ribosomal protein S22-B	High	High	High	High	High	0	29.837	44	6	41	6	130	14.6	9.94	87.24	6	0	2.026	0.872646	116.48	157.6	42.4	0.97	52.16	1.01797e+07	1.66923e+07	1.73046e+06	2.04015e+06	1
783	P38130	Probable mannosyltransferase KTR3	High	High	Peak Found	Peak Found	High	0	8.047	9	3	5	3	404	47.5	8.73	9.62	3	0	1.948	0.872646	53.27	137.7	62.3	22.83	39.95	244616	563269	91287.8	88701.5	1
826	P53961	Phosphatidylinositol N-acetylglucosaminyltransferase subunit GPI15	Peak Found	High	Peak Found	Peak Found	Medium	0.014	2.211	4	1	1	1	229	26.8	10.1	2.4	1	0	2.089	0.872646	30.78	135.3	64.7	34.08	36.29	20149.5	54768.5	8882.29	8161.98	1
830	P40469	DNA repair/transcription protein MET18/MMS19	Peak Found	High	High	High	High	0	5.54	1	1	3	1	1032	117.8	5.88	5.75	1	0	2.08	0.872646	18.77	135.1	64.9	19.9	16.31	192716	241344	67042.3	45950.8	1
864	P28273	5-oxoprolinase	High	High	High	High	High	0	30.341	7	7	23	7	1286	140.3	6.77	41.97	7	0	2.023	0.872646	125.53	132.8	67.2	24.04	23.47	1.39261e+06	3.26377e+06	662415	503396	1
892	P43636	Alpha-1,3/1,6-mannosyltransferase ALG2	High	High	High	Peak Found	High	0	11.159	10	4	6	4	503	58	6.28	13.48	4	0	1.064	0.872646	81.77	131.5	68.5	11.67	19.72	459204	900708	211393	152155	1
1298	P04840	Mitochondrial outer membrane protein porin 1	High	High	High	High	High	0	65.204	52	14	95	14	283	30.4	7.93	260.22	14	0	2.021	0.873162	105.47	109	91	16.83	28.76	1.37511e+07	2.90375e+07	9.85027e+06	8.08911e+06	1
679	Q08960	S-adenosyl-L-methionine-dependent tRNA 4-demethylwyosine synthase	High	High	Peak Found	High	High	0	8.255	4	3	5	3	810	89.7	8.18	8.63	3	0	0.911	0.873371	88.94	142.6	57.4	31.68	42.53	160032	168682	35209.7	35605.7	1
1467	P40886	Hexose transporter HXT8	Peak Found	High	High	High	High	0.001	3.036	2	1	3	1	569	63.5	5.55	5.54	1	0	0.908	0.874039	57.93	95.2	104.8	68.27	46.85	57775.4	275359	71453.5	77328.6	1
464	P47161	Vacuolar protein sorting-associated protein 70	High	High	Peak Found	Peak Found	High	0	4.706	2	2	3	2	811	92	7.17	5.61	2	0	2.057	0.874297	56.7	158.9	41.1	15.19	50.93	157141	324139	29113.2	33641.7	1
468	P22138	DNA-directed RNA polymerase I subunit RPA135	High	High	High	Peak Found	High	0	16.37	5	4	11	4	1203	135.7	7.65	25.41	4	0	1.927	0.874297	59.35	158.7	41.3	31.87	63.35	331395	871514	62616.1	89279.3	1
767	P54839	Hydroxymethylglutaryl-CoA synthase	High	High	High	Peak Found	High	0	16.967	12	5	12	5	491	55	8.16	29.45	5	0	2.014	0.874297	30.61	138.4	61.6	27.93	9.33	485720	1.20493e+06	263824	125672	1
848	Q3E7B6	V-type proton ATPase subunit e	Peak Found	Peak Found	High	Peak Found	Medium	0.037	1.72	12	1	1	1	73	8.4	9.14	2.44	1	0	2.017	0.874297	49.5	133.7	66.3	25.1	52.46	675928	1.60861e+06	254340	301334	1
940	P42934	Dolichyl-phosphate-mannose--protein mannosyltransferase 6	High	High	High	High	High	0	8.264	3	2	8	2	759	88	6.84	19.77	2	0	1.972	0.874297	63.83	128.6	71.4	6.98	2.79	256403	386161	124382	70343	1
1001	Q12265	Ribose-phosphate pyrophosphokinase 5	High	High	High	High	High	0	32.091	22	9	15	9	496	53.5	7.28	32.78	9	0	1.064	0.874297	39.93	125.8	74.2	7.55	36.87	1.195e+06	2.21089e+06	532984	494130	1
1069	P02400	60S acidic ribosomal protein P2-beta	High	High	High	High	High	0	78.624	66	8	187	8	110	11	4.15	529.48	8	0	2.013	0.874297	112.5	122.9	77.1	17.2	9.51	5.05512e+07	6.5819e+07	2.80995e+07	1.33503e+07	1
1118	P53883	Nucleolar protein 13	High	High	High	High	High	0	16.862	14	5	14	5	403	45.6	9.29	31.12	5	0	1.029	0.874297	54.31	119.6	80.4	43.71	37.04	363946	319363	127245	118261	1
1474	P06242	Serine/threonine-protein kinase KIN28	Peak Found	High	Peak Found	Peak Found	Medium	0.023	1.988	3	1	1	1	306	35.2	6.87	2.13	1	0	0.902	0.874297	47.83	94.8	105.2	46.53	10.85	18850.7	62074.2	29739.1	13862.8	1
1479	P38427	Trehalose synthase complex regulatory subunit TSL1	Peak Found	High	Peak Found	Peak Found	High	0.001	3.527	1	1	1	1	1098	122.9	6.64	2.58	1	0	0.893	0.874297	35.73	94.4	105.6	38.44	22.25	22976.6	66714.6	27158.8	20278.8	1
1015	P00560	Phosphoglycerate kinase	High	High	High	High	High	0	154.566	73	30	188	30	416	44.7	7.61	471.3	30	0	2.009	0.874847	97.26	125.1	74.9	7.16	3.14	5.18188e+07	7.78507e+07	2.70244e+07	1.5358e+07	1
419	P53133	Uncharacterized protein YGL117W	High	High	Peak Found	Peak Found	High	0	6.133	10	3	3	3	265	30.7	7.58	5.44	3	0	2.079	0.875559	58.8	162	38	11.48	62.93	102787	201082	15163.4	21460.5	1
1490	P40478	Mitochondrial outer membrane protein porin 2	High	High	High	High	High	0	17.54	18	5	10	5	281	31.2	9.67	23.26	5	0	1.048	0.876314	41.31	93.1	106.9	18.3	24.26	273989	590939	282224	216951	1
840	Q06053	tRNA-dihydrouridine(47) synthase	Peak Found	High	Peak Found	Peak Found	High	0.01	2.374	3	1	1	1	668	76.5	7.42	0	1	0	2.051	0.879565	3.89	134.5	65.5	1.32	3.74	29003.6	47328.9	12773.3	7321.55	1
1010	P33750	Protein SOF1	High	High	Peak Found	Peak Found	High	0	5.794	6	2	2	2	489	56.8	9.41	2.12	2	0	2.025	0.879565	64.82	125.3	74.7	26.51	6.3	88071.6	100188	38861.6	23095.4	1
1461	Q05854	Uncharacterized transcriptional regulatory protein YLR278C	Peak Found	High	Peak Found	Peak Found	Medium	0.02	2.113	1	1	1	1	1341	151.2	8.29	0	1	0	0.915	0.879628	56.64	95.6	104.4	9.94	53.64	6470.02	12382.5	4763.68	5754.2	1
695	P02829	ATP-dependent molecular chaperone HSP82	Peak Found	High	High	Peak Found	High	0	85.831	28	19	73	2	709	81.4	4.91	180.76	19	17	1.996	0.880531	80.54	141.9	58.1	3.27	10.18	6.32261e+06	1.00364e+07	2.20384e+06	1.384e+06	1
1268	P01120	Ras-like protein 2	High	High	High	High	High	0	12.846	12	3	9	2	322	34.7	7.27	22.05	3	0	0.927	0.880531	23.33	110.6	89.4	26.53	13.47	137740	156647	78352.3	51562.5	1
1057	P40557	ER-retained PMA1-suppressing protein 1	High	High	High	Peak Found	High	0	13.875	8	6	7	6	701	81.2	7.84	10.21	6	0	1.054	0.881526	38.23	123.4	76.6	23.41	16.84	291055	675860	177542	122610	1
1572	P43621	Coatomer subunit delta	Peak Found	High	High	High	High	0	5.513	4	2	3	2	546	60.6	5.2	5.91	2	0	2.029	0.881526	65.16	81.8	118.2	16.91	127.13	51875.3	109665	18271.8	186590	1
502	P38323	ATP-dependent clpX-like chaperone, mitochondrial	High	High	High	High	High	0	19.128	17	8	14	8	520	57.9	7.75	26.14	8	0	1.035	0.88202	68.02	156.7	43.3	13.4	88.62	308776	424491	34755.7	82316.5	1
637	Q05567	Sphingosine-1-phosphate lyase	High	High	High	High	High	0	21.527	17	7	14	7	589	65.5	8.03	34.46	7	0	1.895	0.88202	83.96	145.4	54.6	3.8	41.57	504907	795470	127582	127099	1
688	P40525	60S ribosomal protein L34-B	High	High	High	High	High	0	8.411	21	2	22	2	121	13.6	10.83	44.79	2	0	1.987	0.88202	48.89	142.1	57.9	28.48	63.49	1.97806e+07	2.1861e+07	3.7909e+06	5.41859e+06	1
754	P38813	Protein BIG1	High	High	Peak Found	Peak Found	High	0	6.397	6	2	3	2	335	39	5.3	5.9	2	0	2.021	0.88202	36.5	138.9	61.1	17.76	20.8	72935.4	156078	29379.8	21481.5	1
915	P00924	Enolase 1	High	High	High	High	High	0	40.77	25	10	50	2	437	46.8	6.62	117.02	10	0	0.938	0.88202	35.39	130.4	69.6	9.51	38.38	136457	198271	48294.3	45812.4	1
922	Q99297	Mitochondrial 2-oxodicarboxylate carrier 2	High	High	High	High	High	0	35.933	28	9	25	9	307	34	9.7	59.88	9	0	1.08	0.88202	48.44	130	70	6.78	34.82	2.22333e+06	4.06849e+06	913946	821483	1
1375	P41058	40S ribosomal protein S29-B	Not Found	High	High	Peak Found	Medium	0.014	2.197	14	1	2	1	56	6.7	10.01	4.3	1	0	1.078	0.88202	62.08	103.7	96.3		54.62		1.08115e+06	375936	461612	1
925	P30902	ATP synthase subunit d, mitochondrial	High	High	High	High	High	0	11.381	19	3	16	3	174	19.8	8.94	40.84	3	0	1.985	0.882342	13.45	129.9	70.1	8.55	21.26	898075	1.32281e+06	366904	270056	1
450	P38555	GTP-binding protein YPT31/YPT8	High	High	High	Peak Found	High	0	18.091	32	5	17	2	223	24.5	5.08	46.02	5	0	1.029	0.882893	69.31	159.9	40.1	34.98	19.36	347105	348227	55150.7	39493.8	1
768	P35725	Uncharacterized protein YKL063C	High	High	High	Peak Found	High	0	8.413	10	2	5	2	167	19	9.39	11.06	2	0	1.983	0.882893	52.08	138.4	61.6	11.3	51.41	634174	1.23749e+06	195644	227869	1
655	P32589	Heat shock protein homolog SSE1	High	High	High	High	High	0	46.947	23	12	31	12	693	77.3	5.22	81.42	12	0	1.974	0.885152	53.54	143.9	56.1	2.77	18.06	5.52103e+06	8.8265e+06	1.7397e+06	1.22275e+06	1
779	P32353	Delta(7)-sterol 5(6)-desaturase ERG3	High	High	High	High	High	0	18.223	13	6	20	6	365	42.7	7.69	37.95	6	0	1.086	0.885152	99.36	137.9	62.1	9.95	46.51	1.54322e+06	2.9541e+06	495719	533634	1
865	P52871	Protein transport protein SBH2	High	High	High	High	High	0	6.561	15	1	5	1	88	9.6	10.43	12.54	1	0	1.978	0.885152	59.37	132.8	67.2	4.96	54.18	777892	1.20555e+06	237451	289440	1
879	Q00711	Succinate dehydrogenase	High	High	Not Found	Peak Found	High	0	4.192	2	1	2	1	640	70.2	7.5	5.08	1	0	1.948	0.885152	13.33	132.2	67.8	12.67		40279.6	80141.5		11510.5	1
1161	P43535	Protein GCN20	High	High	High	High	High	0	23.19	11	8	13	8	752	85	6.25	26.08	8	0	1.081	0.885152	71.13	116.9	83.1	0.26	16.18	501556	836930	297923	203823	1
1164	P09733	Tubulin alpha-1 chain	High	High	High	High	High	0	31.895	23	7	25	4	447	49.8	5.07	64.57	7	3	1.084	0.885152	100.69	116.6	83.4	15.78	18.16	2.78826e+06	3.70472e+06	1.4682e+06	1.03328e+06	1
1440	P32333	TATA-binding protein-associated factor MOT1	Peak Found	High	Peak Found	Peak Found	High	0	5.934	2	2	2	2	1867	209.8	6.57	4.83	2	0	0.956	0.885152	17.04	97.8	102.2	18.24	17.38	12236.4	26366.4	15431.8	6552.49	1
1476	P28777	Chorismate synthase	High	High	High	Peak Found	High	0	5.642	11	3	5	3	376	40.8	7.8	4.6	3	0	0.909	0.885152	74.74	94.6	105.4	19.85	38.97	45626.2	100628	41353.1	39580.8	1
1511	P43561	Iron transport multicopper oxidase FET5	High	High	High	High	High	0	14.678	9	5	7	5	622	70.8	5.15	15.78	5	0	1.062	0.885152	36.18	91.1	108.9	61.7	11.7	163973	694546	269429	172897	1
880	Q08732	Serine/threonine-protein kinase HRK1	High	High	Peak Found	Peak Found	High	0.004	2.78	2	1	2	1	759	85.6	7.31	2.23	1	0	1.944	0.885796	57.25	132.1	67.9	27.8	60.29	55940	62447.2	14003.3	18925.6	1
894	P14741	Translation initiation factor eIF-2B subunit alpha	Peak Found	High	Peak Found	Peak Found	High	0.006	2.623	3	1	2	1	305	34	5.33	4.08	1	0	1.91	0.885796	30.12	131.3	68.7	13.77	30.91	43613.8	88151.2	18875.1	16002	1
1030	Q01855	40S ribosomal protein S15	High	High	High	High	High	0	27.785	38	4	70	4	142	16	10.7	159.62	4	0	1.97	0.885796	32.72	124.5	75.5	12.25	47.51	3.57346e+07	7.06742e+07	1.56173e+07	1.70806e+07	1
1288	P40961	Prohibitin-1	High	High	High	High	High	0	28.034	40	7	24	7	287	31.4	8.25	57.08	7	0	1.089	0.885796	50.81	109.5	90.5	25.73	17.23	1.57731e+06	1.81504e+06	898078	623726	1
1339	P40007	Nucleolar protein 16	High	High	High	High	High	0	8.658	11	3	6	3	231	26.9	9.26	13.66	3	0	1.016	0.885796	40.86	106.1	93.9	10.26	44.29	156332	300574	100833	104800	1
1196	P14126	60S ribosomal protein L3	High	High	High	High	High	0	56.07	36	13	61	13	387	43.7	10.29	132.47	13	0	1.09	0.886195	87.06	114.7	85.3	21.36	48.99	1.72195e+07	2.11157e+07	7.16785e+06	8.02665e+06	1
834	P19812	E3 ubiquitin-protein ligase UBR1	High	Peak Found	Peak Found	Not Found	Medium	0.02	2.11	0	1	1	1	1950	224.7	5.54	0	1	0	2.073	0.886978	9.37	134.9	65.1	8.92		12946.1	18968.2	5488.39		1
893	P41921	Glutathione reductase	High	High	Peak Found	Peak Found	High	0.006	2.553	2	1	2	1	483	53.4	7.83	4.73	1	0	1.915	0.886978	17.56	131.4	68.6	3.04	16.99	39362.5	62686.3	16695.8	11554.9	1
1450	P33418	Exportin-T	Peak Found	High	Not Found	Peak Found	Medium	0.014	2.204	1	1	1	1	1100	126.7	5.15	0	1	0	0.937	0.886978	20.1	96.7	103.3	19		4492.16	9786.46		2794.02	1
1092	Q03195	Translation initiation factor RLI1	High	High	High	High	High	0	30.623	14	9	23	9	608	68.3	8.66	49.85	9	0	1.092	0.887275	80.19	121.5	78.5	10.92	21.53	763426	1.48155e+06	428181	316398	1
895	Q07362	Protein PBP4	Peak Found	Peak Found	Peak Found	High	Medium	0.014	2.188	8	1	1	1	185	19.9	10.35	1.79	1	0	1.912	0.88792	60.7	131.3	68.7	15.72	58.87	45398.4	60372.4	12765.9	16837.2	1
1344	P0CX47	40S ribosomal protein S11-A	High	High	High	High	High	0	18.605	31	5	29	5	156	17.7	10.78	58.26	5	0	1.096	0.892576	121.82	105.5	94.5	32.96	53.63	6.63581e+06	1.77361e+07	4.73119e+06	5.7145e+06	1
1437	Q05812	Meiotic sister-chromatid recombination protein 3	Peak Found	High	Peak Found	Peak Found	High	0.008	2.398	3	1	1	1	728	80.5	9.14	0	1	0	0.961	0.892576	40.84	98	102	0.31	37.63	16274.4	26938	12048.5	11300	1
1357	P33416	Heat shock protein 78, mitochondrial	High	High	High	High	High	0	19.007	10	6	13	6	811	91.3	8.05	20.9	6	0	1.098	0.893829	47.66	104.9	95.1	2.19	39.45	1.59233e+06	2.56644e+06	998643	963002	1
1329	P31539	Heat shock protein 104	High	High	High	High	High	0	64.739	20	17	44	17	908	102	5.45	112.25	17	0	1.098	0.89467	75.31	107.4	92.6	0.81	23.6	2.46799e+06	4.15022e+06	1.69341e+06	1.2894e+06	1
642	P52910	Acetyl-coenzyme A synthetase 2	High	High	High	High	High	0	64.134	25	17	55	17	683	75.4	6.68	122.72	17	0	1.951	0.89527	78.35	144.8	55.2	4.38	27.72	3.55555e+06	6.28902e+06	1.5948e+06	582830	1
822	Q02931	NET1-associated nuclear protein 1	High	High	Peak Found	Peak Found	High	0	10.695	5	4	5	4	896	101.2	6.35	12.34	4	0	1.957	0.89527	49.58	135.5	64.5	15.3	46.66	103402	213622	36469.2	39351.2	1
995	P07251	ATP synthase subunit alpha, mitochondrial	High	High	High	High	High	0	47.943	21	11	50	11	545	58.6	9.04	119.27	11	0	1.1	0.89527	71.27	126.2	73.8	2.57	33.06	6.98632e+06	1.12004e+07	2.96058e+06	2.59159e+06	1
1173	P00925	Enolase 2	High	High	High	Peak Found	High	0	63.016	34	12	67	4	437	46.9	6	157.2	12	9	1.1	0.89527	55.54	116.3	83.7	16.93	19.03	9.92055e+06	1.29672e+07	5.17221e+06	3.68635e+06	1
866	P38206	Oligosaccharide translocation protein RFT1	High	High	Not Found	Peak Found	High	0	5.398	2	1	2	1	574	66.2	9.17	4.52	1	0	1.975	0.895534	123.98	132.8	67.2	90.72		29371.7	223594		16199.6	1
903	P38778	Manganese transporter SMF2	Not Found	High	Peak Found	Peak Found	High	0.006	2.588	2	1	1	1	549	59.7	5.99	1.94	1	0	1.893	0.895534	51.59	130.9	69.1		46.48		72801.1	15395.4	16564.3	1
863	Q12159	RNA annealing protein YRA1	High	High	High	High	High	0	27.757	32	7	26	7	226	24.9	11.33	64.6	7	0	1.945	0.897283	50.94	133.1	66.9	2.65	43.81	2.3488e+06	4.05384e+06	817557	843401	1
750	P11484	Ribosome-associated molecular chaperone SSB1	High	High	High	High	High	0	133.341	53	26	140	2	613	66.6	5.44	356.2	26	24	1.942	0.898568	112.51	139	61	11.66	33.79	2.02398e+07	2.85217e+07	9.77535e+06	3.26472e+06	1
806	P12709	Glucose-6-phosphate isomerase	High	High	High	High	High	0	15.913	7	3	8	3	554	61.3	6.46	20.78	3	0	1.858	0.898568	22.56	136.7	63.3	18.72	12.87	387353	493406	134083	87483.6	1
882	P52489	Pyruvate kinase 2	High	Peak Found	High	Peak Found	High	0	10.27	5	3	26	1	506	55.2	6.92	66.45	3	0	1.943	0.898568	34.64	132	68	1.5	32.5	5.97399e+06	10144695	2.30198e+06	1.99832e+06	1
526	P38175	37S ribosomal protein MRP21, mitochondrial	High	High	High	High	High	0	5.599	10	2	6	2	177	20.4	10.52	11.03	2	0	1.948	0.900124	45.96	153.8	46.2	30.32	50.88	72385.5	186025	17348.6	20030	1
835	P19097	Fatty acid synthase subunit alpha	High	High	High	High	High	0	352.258	45	75	362	75	1887	206.8	5.44	823.64	75	0	1.937	0.900124	97.26	134.9	65.1	0.18	23.93	5.86063e+07	9.71887e+07	2.23172e+07	1.70742e+07	1
876	Q08970	Mitochondrial metal transporter 2	High	High	High	Peak Found	High	0	8.667	6	2	4	2	484	52.4	7.64	12.02	2	0	1.861	0.900124	63.23	132.4	67.6	32.44	55.48	40906.7	108496	16315.1	20320.1	1
923	P11633	Non-histone chromosomal protein 6B	High	High	High	High	High	0	5.612	13	1	5	1	99	11.5	9.89	13.13	1	0	1.858	0.900124	58.6	130	70	3.93	53.24	300745	472937	99181.7	119028	1
941	Q05022	rRNA biogenesis protein RRP5	High	High	High	High	High	0	102.563	19	31	65	31	1729	193	6.19	150.24	31	0	1.108	0.900124	83.19	128.6	71.4	18.15	28.21	2.75108e+06	5.92025e+06	1.33015e+06	1.08341e+06	1
1193	P40348	Replication factor C subunit 2	High	High	High	High	High	0	22.146	20	7	15	7	353	39.7	8.43	25.86	7	0	1.107	0.900124	74.38	115.1	84.9	16.42	44.9	764611	1.00672e+06	338148	354844	1
1301	Q07478	ATP-dependent RNA helicase SUB2	High	High	High	High	High	0	38.385	29	11	38	11	446	50.3	5.52	72.6	11	0	1.109	0.900124	76.58	108.9	91.1	9.25	43.65	5.44064e+06	1.03115e+07	3.30988e+06	3.40619e+06	1
1427	P00546	Cyclin-dependent kinase 1	High	High	High	High	High	0	17.366	21	6	18	6	298	34	8.35	40.35	6	0	1.108	0.900124	46.87	99.6	100.4	9.65	33	718537	1.36949e+06	572315	500496	1
608	P53598	Succinate--CoA ligase	High	High	Not Found	Peak Found	High	0	7.519	12	3	3	3	329	35	8.46	7.15	3	0	1.987	0.900948	14.79	147.8	52.2	8.82		91940.3	173188		17598.3	1
744	P53723	UPF0674 endoplasmic reticulum membrane protein YNR021W	High	High	High	High	High	0	36.069	21	8	27	8	404	47.1	9.39	53.69	8	0	1.93	0.902569	49.52	139.3	60.7	0.74	38.87	3.57972e+06	5.88951e+06	1.09704e+06	1.04841e+06	1
841	P32621	Guanosine-diphosphatase	High	High	High	High	High	0	39.186	31	10	28	10	518	56.8	5.35	60.08	10	0	1.93	0.902569	98.31	134.5	65.5	3.85	25.97	1.99165e+06	3.49661e+06	775661	611398	1
896	P25635	Periodic tryptophan protein 2	High	High	Peak Found	Peak Found	High	0	5.467	2	2	2	2	923	103.9	5.1	4.85	2	0	1.888	0.904159	66.35	131.3	68.7	4.37	31.06	73879.5	130665	29855.7	25367.6	1
910	P38805	Ribosome production factor 1	High	High	High	High	High	0	16.035	17	5	12	5	295	35.1	9.47	27.94	5	0	1.837	0.904159	80.06	130.6	69.4	29.24	15.07	339044	857488	187117	125986	1
916	P48562	Serine/threonine-protein kinase CLA4	High	High	Peak Found	High	High	0	7.776	7	3	5	3	842	93.9	9.09	4.87	3	0	1.964	0.904159	68.37	130.4	69.6	0.95	25.54	102447	168042	42352.3	33173.3	1
1270	P40075	Vesicle-associated membrane protein-associated protein SCS2	High	High	High	High	High	0	43.108	50	10	27	10	244	26.9	4.89	63.63	10	0	1.113	0.904159	89.99	110.5	89.5	31.27	47.66	8.83659e+06	9.37067e+06	3.7694e+06	4.13231e+06	1
560	P53334	Probable family 17 glucosidase SCW4	Peak Found	High	High	Peak Found	High	0	9.699	12	3	5	3	386	40.1	4.83	10.81	3	0	1.974	0.904342	91.39	152	48	19.89	98.67	89181.5	196788	71896.3	6959.56	1
318	Q05946	U3 small nucleolar RNA-associated protein 13	High	High	High	High	High	0	16.037	7	5	8	5	817	91	5.43	18.01	5	0	1.944	0.905529	55.05	176.2	23.8	72.83	86.23	130571	678114	14346.9	32173.2	1
553	Q12746	Plasma membrane-associated coenzyme Q6 reductase PGA3	High	High	High	High	High	0	13.326	14	4	11	4	312	35.3	5.55	23.54	4	0	1.92	0.905529	68.63	152.2	47.8	5.92	24.17	665256	1.01717e+06	158027	121328	1
776	P32476	Squalene epoxidase ERG1	High	High	High	High	High	0	61.411	25	14	72	14	496	55.1	6.48	173.47	14	0	1.118	0.905529	87.77	138	62	1.85	40.66	1.09441e+07	1.7724e+07	3.38359e+06	3.32417e+06	1
788	Q03322	t-SNARE affecting a late Golgi compartment protein 1	High	High	High	High	High	0	10.673	13	2	8	2	224	25.8	4.61	22.02	2	0	1.934	0.905529	69.84	137.5	62.5	11.98	71.71	228277	320239	156168	27770.3	1
888	P38115	D-arabinose dehydrogenase	High	High	Peak Found	Peak Found	High	0	4.578	5	2	4	2	344	38.9	5.96	5.54	2	0	1.921	0.905529	64.2	131.7	68.3	3.51	57.4	8.77059e+06	1.53237e+07	2.83745e+06	3.64984e+06	1
890	P39540	Elongation of fatty acids protein 1	High	High	High	Peak Found	High	0.006	2.664	3	1	9	1	310	36.2	9.39	8.53	1	0	1.922	0.905529	7.24	131.6	68.4	7.05	3.25	661750	1.2157e+06	331172	188509	1
919	P53893	Ribosome assembly protein 1	Peak Found	High	Peak Found	Peak Found	High	0.007	2.417	1	1	1	1	1110	124.4	5.12	2.07	1	0	1.868	0.905529	43.13	130.3	69.7	23.42	45.98	28628.8	66487.9	12100.4	12916.3	1
751	Q03690	Clustered mitochondria protein 1	High	High	High	Peak Found	High	0	32.337	9	11	25	11	1277	145.1	6.39	37.02	11	0	1.119	0.9073	64.55	139	61	13.68	27.39	781952	1.57854e+06	291241	234393	1
601	P12683	3-hydroxy-3-methylglutaryl-coenzyme A reductase 1	High	High	High	High	High	0	61.676	18	15	48	14	1054	115.6	8	109.19	15	1	1.914	0.90801	90.12	148.3	51.7	14.09	34.12	1.92321e+06	3.90505e+06	542043	482074	1
885	P43585	Vacuolar transporter chaperone 2	High	High	High	High	High	0	36.385	18	13	24	12	828	95.4	6.76	46.12	13	1	1.914	0.90801	92.47	131.8	68.2	0.75	45.68	1.65432e+06	2.72128e+06	569711	605284	1
1103	Q04947	Reticulon-like protein 1	High	High	High	High	High	0	32.717	31	8	31	8	295	32.9	8.98	55.85	8	0	1.122	0.90801	111.4	120.9	79.1	6.28	39.77	1.15848e+07	1.76231e+07	5.08244e+06	4.92483e+06	1
497	P38687	Signal recognition particle subunit SRP68	High	High	High	Peak Found	High	0	14.328	10	5	9	5	599	69	8.75	18.39	5	0	1.855	0.908514	23.85	156.8	43.2	0.33	6.53	305925	511001	75584.8	45070.2	1
639	P22768	Argininosuccinate synthase	High	High	High	Peak Found	High	0	5.253	5	2	4	2	420	46.9	5.62	7.6	2	0	1.948	0.909596	41.65	145.2	54.8	58.19	43.1	91280.1	363947	36474.9	37214.4	1
886	P38682	ADP-ribosylation factor GTPase-activating protein GLO3	Peak Found	High	Peak Found	Peak Found	Medium	0.035	1.749	2	1	1	1	493	55.1	8.25	2.33	1	0	1.933	0.909596	60.65	131.8	68.2	11.55	57.38	29114.7	41096.5	8448.07	10864.2	1
920	P26754	Replication factor A protein 2	High	Peak Found	Peak Found	Peak Found	Medium	0.022	2.018	4	1	1	1	273	29.9	4.98	1.83	1	0	1.869	0.909596	42.87	130.3	69.7	14.15	43.07	39517.5	80303.4	15976.3	16291	1
1114	Q12403	Protein ERP3	High	High	High	Peak Found	High	0	7.964	12	3	4	3	225	26.5	6.86	4.57	3	0	1.956	0.909596	89.46	119.9	80.1	16.03	60.2	160586	212618	56864.1	76742.2	1
1144	P32657	Chromo domain-containing protein 1	Peak Found	High	Peak Found	Peak Found	High	0	4.966	2	2	2	2	1468	168.1	6.51	4.45	2	0	0.945	0.909596	39.75	118.1	81.9	13.06	38.86	47470.3	94982.7	25524.8	24389.5	1
1439	P25298	mRNA 3'-end-processing protein RNA14	Not Found	High	Peak Found	Peak Found	Medium	0.031	1.82	2	1	1	1	677	79.9	5.77	2.02	1	0	0.958	0.909596	51.05	97.9	102.1		46.04		36063.1	15115.2	16149.6	1
1573	P39936	Eukaryotic initiation factor 4F subunit p130	High	High	High	High	High	0	10.32	4	3	5	2	914	103.8	7.64	11.32	3	0	1.962	0.909596	74.46	81.7	118.3	48.04	37.83	51242.9	172860	75293.5	70826.5	1
1412	Q06523	Uncharacterized protein YPR148C	High	Not Found	High	High	High	0	6.734	7	2	4	2	435	49.2	4.75	6.79	2	0	0.949	0.909812	13.32	100.6	99.4		28.6	56381.6		64038.8	23102.9	1
509	P06169	Pyruvate decarboxylase isozyme 1	High	High	High	High	High	0	140.248	45	20	154	18	563	61.5	6.19	456.96	20	2	1.902	0.911137	65.14	155.6	44.4	14.65	48.01	5.99728e+07	8.09826e+07	1.01497e+07	1.119e+07	1
930	Q02908	Elongator complex protein 3	Peak Found	High	Not Found	Peak Found	High	0.001	3.29	2	1	1	1	557	63.6	9	1.85	1	0	1.835	0.911137	34.41	129.5	70.5	31.97		27536.3	72526.9		9611.57	1
997	Q12096	Glucose N-acetyltransferase 1	High	High	High	Peak Found	High	0	14.606	10	5	9	5	491	57.5	8.37	18.54	5	0	1.093	0.911137	65.87	126.1	73.9	0.43	15.73	276818	457419	169360	73641.1	1
1401	P40087	DNA damage-inducible protein 1	Peak Found	High	High	Peak Found	High	0	14.665	13	4	5	4	428	47.3	5.11	9.32	4	0	0.95	0.911137	32.7	101.1	98.9	2.6	34.07	45589.3	78634.4	54372.3	18082.3	1
667	Q02804	ADP-ribosylation factor-like protein 3	High	High	Peak Found	Peak Found	High	0	4.563	15	2	3	2	198	22.8	6.37	3.81	2	0	1.915	0.91145	57.39	143.4	56.6	15.35	71.74	74550.2	99674.7	43198	7676.79	1
881	Q12144	Pore and endoplasmic reticulum protein of 33 kDa	Peak Found	High	Peak Found	Peak Found	Medium	0.023	1.983	3	1	1	1	273	32.6	10.08	0	1	0	1.943	0.91145	70.72	132.1	67.9	7.24	63.45	16087	29629.3	5032.12	7188.38	1
1078	P50085	Prohibitin-2	High	High	High	High	High	0	21.068	28	8	17	8	310	34.4	9.92	31.78	8	0	1.898	0.91145	56.3	122.4	77.6	8.8	19.38	732448	1.07507e+06	355553	254667	1
937	P47079	T-complex protein 1 subunit theta	High	High	High	High	High	0	67.421	35	16	67	16	568	61.6	5.72	151.27	16	0	1.896	0.911836	86.54	129	71	1.13	15.56	4.83141e+06	7.90551e+06	2.20973e+06	1.49841e+06	1
1253	P47039	Probable kynurenine--oxoglutarate transaminase BNA3	Peak Found	High	Not Found	Peak Found	High	0	8.516	5	2	2	2	444	50.1	6.57	5.4	2	0	1.008	0.911836	24.75	111.2	88.8	76.96		53158.8	299424		39737.3	1
1133	P16474	Endoplasmic reticulum chaperone BiP	High	High	High	High	High	0	162.57	43	31	218	29	682	74.4	4.93	564.57	31	0	1.132	0.911876	125.53	118.8	81.2	14.67	2.43	2.8144e+07	3.79957e+07	1.59376e+07	8.96688e+06	1
1434	P40576	Inner membrane assembly complex subunit 22	Peak Found	High	Peak Found	Peak Found	High	0.007	2.483	5	1	1	1	216	24.6	8.87	2.42	1	0	0.971	0.912213	47.71	98.5	101.5	15.93	47.95	25594.3	53358	39333.7	10555.2	1
842	P00817	Inorganic pyrophosphatase	High	High	High	High	High	0	9.582	13	3	6	3	287	32.3	5.58	13.9	3	0	1.867	0.914134	74.73	134.3	65.7	3.67	54.9	252784	398987	74911.5	92402.1	1
1031	P00445	Superoxide dismutase	High	High	High	High	High	0	5.682	18	2	7	2	154	15.8	6	10.93	2	0	0.994	0.915466	44.54	124.5	75.5	19.87	42.65	134394	168393	48484.2	49116.5	1
851	P16140	V-type proton ATPase subunit B	High	High	High	High	High	0	57.583	38	15	50	15	517	57.7	5.07	102.07	15	0	1.136	0.915678	81.75	133.6	66.4	11.87	15.33	3.66829e+06	7.21664e+06	1.66593e+06	1.12592e+06	1
1436	Q06338	Protein BCP1	Peak Found	High	High	Peak Found	High	0	6.84	7	2	2	2	283	32.6	4.83	5.57	2	0	1.896	0.917321	52.63	98.1	101.9	17.39	39.39	54992.8	71405.6	62910.9	19297.9	1
656	P33333	1-acyl-sn-glycerol-3-phosphate acyltransferase	High	High	High	High	High	0	18.723	30	5	13	5	303	33.9	9.6	33.76	5	0	1.885	0.91806	57.2	143.9	56.1	10.18	7.12	1.26551e+06	2.43019e+06	472477	284077	1
369	Q05166	Nucleoporin ASM4	High	High	Not Found	Peak Found	High	0	9.645	10	3	4	3	528	58.8	7.94	7.39	3	0	0.997	0.919032	10.09	167.9	32.1	11.67		138213	271135		14605.9	1
312	P0C2H8	60S ribosomal protein L31-A	High	High	High	Peak Found	High	0	28.142	38	5	25	5	113	12.9	9.99	65.98	5	0	1.876	0.920616	128.51	176.6	23.4	16.72	61.08	1.12471e+07	1.47453e+07	1.96539e+06	423905	1
425	Q12284	FAD-linked sulfhydryl oxidase ERV2	High	High	Peak Found	Peak Found	High	0	9.397	14	2	5	2	196	22.1	7.43	6.22	2	0	1.019	0.920616	60.86	161.6	38.4	37.9	54.95	150584	144538	16888.5	20850.3	1
904	Q12186	Branchpoint-bridging protein	Peak Found	High	Not Found	Peak Found	High	0.01	2.372	2	1	1	1	476	53	9.69	2.52	1	0	1.895	0.920616	55.91	130.9	69.1	49.9		19616	68173.9		7618	1
1011	P06103	Eukaryotic translation initiation factor 3 subunit B	High	High	High	High	High	0	50.412	23	14	44	14	763	88.1	6.01	81.54	14	0	1.878	0.920616	71.48	125.3	74.7	8.26	10.24	2.5579e+06	4.77986e+06	1.40646e+06	884008	1
1043	P39730	Eukaryotic translation initiation factor 5B	High	High	High	High	High	0	61.94	19	19	57	19	1002	112.2	5.76	120.84	19	0	1.142	0.920616	105.97	124.1	75.9	7.95	38.33	4.9615e+06	7.37108e+06	2.03399e+06	1.928e+06	1
565	Q06668	Methyltransferase OMS1, mitochondrial	High	High	Peak Found	High	High	0	12.049	11	5	8	5	471	55.6	9.39	16.63	5	0	1.9	0.921898	55.81	151.6	48.4	13.79	60.2	184596	373218	38637	52144.2	1
663	Q08965	Ribosome biogenesis protein BMS1	High	High	Peak Found	High	High	0	14.156	6	6	8	6	1183	135.5	6.81	12.25	6	0	1.858	0.921898	53.44	143.5	56.5	19.59	21.74	206638	453995	74905.9	55519.4	1
874	Q00955	Acetyl-CoA carboxylase	High	High	High	High	High	0	214.439	30	52	185	52	2233	250.2	6.28	419.04	52	0	1.873	0.921898	72.78	132.5	67.5	1.89	17.24	1.78111e+07	3.04139e+07	7.61959e+06	5.29244e+06	1
1431	P40896	Uncharacterized protein YJL213W	Not Found	Peak Found	High	Peak Found	Medium	0.031	1.835	7	1	1	1	331	35.9	7.03	2.1	1	0	0.977	0.921898	46.34	98.8	101.2		42.19		44311.6	18777.3	18888.7	1
889	P53220	Mitochondrial import inner membrane translocase subunit TIM21	High	High	High	High	High	0.007	2.431	5	1	4	1	239	27.2	10.14	5.89	1	0	1.929	0.922021	77.18	131.7	68.3	24.87	74.68	121229	287543	39053.5	68739.1	1
1362	P52911	Glucan 1,3-beta-glucosidase 2	High	High	High	High	High	0	19.627	14	7	14	7	562	63.5	5.38	31.46	7	0	1.147	0.922021	39.22	104.5	95.5	8.6	3.11	506320	950797	470962	245001	1
397	P47112	Cell division cycle protein CDT1	High	High	High	Peak Found	High	0	5.983	5	2	4	2	604	68.4	8.51	9.26	2	0	1.871	0.922147	59.55	164.8	35.2	19.98	69.53	77899.6	97441.2	23175.9	4294.04	1
724	P32861	UTP--glucose-1-phosphate uridylyltransferase	High	High	High	High	High	0	22.552	17	7	16	7	499	56	7.44	35.95	7	0	1.868	0.922147	54.43	140.6	59.4	3.7	0.28	991854	1.73759e+06	402012	219400	1
911	Q07349	MIOREX complex component 9	High	Peak Found	Not Found	Peak Found	High	0.007	2.435	2	1	1	1	420	48.3	9.91	0	1	0	1.88	0.922147	26.18	130.6	69.4	24.59		23871.4	56392.6		7703.38	1
359	Q12241	Syntaxin VAM3	High	High	Peak Found	Peak Found	High	0	6.096	10	2	2	2	283	32.5	7.05	2.38	2	0	1.816	0.92244	61.43	168.7	31.3	22.12	14.31	75392.6	91430.7	10119.3	6739.65	1
905	P33891	Protein transport protein TIP20	Peak Found	High	Peak Found	Peak Found	High	0.006	2.497	1	1	1	1	701	81.1	6.34	2.09	1	0	1.894	0.9225	43.25	130.9	69.1	7.26	41.51	19861.9	36593.7	7640.12	7604.88	1
454	O14455	60S ribosomal protein L36-B	High	High	High	High	High	0	41.256	46	8	69	8	100	11.1	11.59	160.92	8	0	1.861	0.925121	126.35	159.6	40.4	10.81	59.28	2.63067e+07	5.09735e+07	4.30232e+06	5.71467e+06	1
602	P40825	Alanine--tRNA ligase, mitochondrial	High	High	High	High	High	0	23.763	9	8	12	8	983	110	5.71	22.89	8	0	1.802	0.925121	78.41	148.2	51.8	2.44	61.86	510388	878332	106337	147708	1
676	P25376	General amino acid permease AGP1	High	Peak Found	High	High	High	0	6.916	5	3	7	3	633	69.6	6.96	12.38	3	0	1.859	0.925121	50.32	142.8	57.2	10.11	55.48	637038	1.22214e+06	169450	211055	1
917	P53251	Ribosome biogenesis protein SLX9	High	Peak Found	Peak Found	Peak Found	Medium	0.02	2.114	4	1	1	1	210	24.1	9.96	1.71	1	0	1.875	0.925121	88.78	130.4	69.6	7.55	75.52	26618.9	39770.3	6944.01	12428.1	1
958	P53109	Probable metalloreductase AIM14	High	Not Found	Peak Found	Peak Found	High	0.006	2.612	3	1	1	1	570	65.8	8.72	2.18	1	0	1.775	0.925121	88.02	127.9	72.1		72.2	44116.6		13244.8	22219	1
1398	P33749	Zinc finger protein MSN4	Not Found	High	Peak Found	Peak Found	Medium	0.019	2.133	3	1	1	1	630	69.7	7.23	0	1	0	1.035	0.925121	81.38	101.7	98.3		68.05		15359.7	4946.67	7677.4	1
891	P41277	Glycerol-1-phosphate phosphohydrolase 1	High	High	High	High	High	0	55.969	42	12	62	8	250	27.9	5.55	155.78	12	4	1.858	0.925146	111.77	131.6	68.4	11.2	26.41	1.14859e+07	1.62921e+07	4.27774e+06	3.39378e+06	1
336	P25454	DNA repair protein RAD51	High	High	Peak Found	High	High	0	9.772	14	3	6	3	400	42.9	4.92	14.43	3	0	1.924	0.925567	50.05	172.5	27.5	13.09	47.71	182037	251347	17417.3	19111	1
305	Q07938	S-methyl-5'-thioadenosine phosphorylase	High	High	High	Peak Found	High	0	6.958	13	3	5	3	337	37.8	7.8	9.6	3	0	1.883	0.925658	31.31	179.5	20.5	6.27	113.28	127934	194636	39414.1	2367.67	1
548	P35724	Manganese resistance protein MNR2	High	High	Peak Found	Peak Found	High	0	5.869	3	2	4	2	969	109.7	7.55	9.75	2	0	1.882	0.925658	59.84	152.3	47.7	15.76	101.76	128447	170730	13616	45380	1
657	Q04067	Eukaryotic translation initiation factor 3 subunit G	High	High	High	High	High	0	16.43	20	5	20	5	274	30.5	6.81	39.54	5	0	1.156	0.925658	56.92	143.8	56.2	8.12	12.19	851555	1.26196e+06	269785	174324	1
954	P04076	Argininosuccinate lyase	High	High	Peak Found	Peak Found	High	0	6.404	4	2	3	2	463	52	5.73	7.46	2	0	1.781	0.925658	48.71	128.1	71.9	16.55	49.02	48095.7	101155	40823.7	10767.6	1
1213	P00937	Multifunctional tryptophan biosynthesis protein	High	High	High	High	High	0	33.019	27	9	21	9	484	53.5	6.92	47.47	9	0	1.852	0.925658	64.42	113.8	86.2	17.84	44.22	4.12857e+06	8.84596e+06	2.4029e+06	2.49494e+06	1
1233	Q06169	Peroxisomal membrane protein PEX30	High	High	High	High	High	0	17.58	12	5	11	5	523	59.4	5.8	25.66	5	0	1.117	0.925658	65.37	112.5	87.5	15.01	34.53	225843	464653	142714	127715	1
1296	Q08208	Nucleolar protein 12	High	High	High	High	High	0	34.35	29	10	16	10	459	51.9	9.44	34.49	10	0	1.158	0.925658	85.65	109.1	90.9	5.73	35.96	806163	1.23589e+06	466027	426149	1
1413	P52920	Cytosolic Fe-S cluster assembly factor NBP35	Peak Found	High	High	Not Found	High	0.003	2.919	6	1	3	1	328	35.2	4.64	6.52	1	0	1.012	0.925658	7.99	100.6	99.4	7.61		19699.2	29405	17265.4		1
1418	P38878	Endoplasmic reticulum junction formation protein lunapark	Peak Found	High	Not Found	Peak Found	High	0.003	2.927	3	1	1	1	278	32	8.87	2.03	1	0	1.002	0.925658	19	100.1	99.9	17.97		24022.3	51566.8		13870.2	1
1606	Q05497	Uncharacterized transporter YDR338C	High	High	High	Peak Found	High	0	5.682	2	2	4	2	695	77.8	5.33	7.86	2	0	0.991	0.925658	108.88	75.6	124.4	37.39	31.97	37377.6	106815	59998.6	51670.5	1
325	P34222	Peptidyl-tRNA hydrolase 2	Peak Found	High	Peak Found	Peak Found	High	0	8.215	14	3	4	3	208	22.4	5.43	7.04	3	0	1.785	0.927102	29.92	174.9	25.1	7.12	98.7	362050	665731	21592.2	65981.2	1
1279	Q03714	U1 SNP1-associating protein 1	High	High	High	High	High	0	9.561	5	4	8	4	838	96.6	5.11	14.22	4	0	1.83	0.928955	77.48	110	90	14.08	15.36	113955	155152	70833.9	47895	1
730	Q12099	ATP-dependent RNA helicase FAL1	High	High	Peak Found	Peak Found	High	0	6.587	7	2	4	2	399	45.2	9	8.96	2	0	1.878	0.930699	35.4	140.1	59.9	12.92	36.75	95822.4	191335	32230.5	29826.4	1
1003	P32481	Eukaryotic translation initiation factor 2 subunit gamma	High	High	High	High	High	0	31.052	27	10	23	10	527	57.8	6.8	49.97	10	0	1.843	0.930699	100.61	125.7	74.3	34.36	0.96	646889	1.76593e+06	455899	251233	1
1211	P38701	40S ribosomal protein S20	High	High	High	High	High	0	33.177	48	8	22	8	121	13.9	9.52	56.7	8	0	1.165	0.930699	104.69	113.9	86.1	10.63	1.43	8.35501e+06	1.19488e+07	5.42436e+06	3.00893e+06	1
1335	P38087	Carrier protein YMC2, mitochondrial	Peak Found	High	High	High	High	0	8.856	10	4	5	4	329	36.5	9.26	9.98	4	0	1.165	0.930699	54.87	106.8	93.2	14.82	48.57	2.24522e+06	4.60656e+06	1.42367e+06	1.58362e+06	1
1257	P25580	Protein PBN1	High	High	Peak Found	Peak Found	High	0	4.176	6	2	4	2	416	47.9	5.66	5.38	2	0	0.978	0.931063	75.49	111	89	35.81	20.29	53715	149860	45183	32792	1
736	P19524	Myosin-2	High	High	High	Peak Found	High	0	20.664	6	8	12	6	1574	180.6	6.32	23.21	8	2	1.772	0.933242	42.08	139.8	60.2	15.87	11.27	375043	497665	124827	79610	1
1208	P53192	Golgi to ER traffic protein 1	High	High	High	High	High	0	12.557	24	5	9	5	235	27.1	9.16	13.95	5	0	1.168	0.933242	71.34	114.1	85.9	5.49	66.7	550014	846022	223627	338631	1
1400	P17555	Adenylyl cyclase-associated protein	Peak Found	High	Peak Found	Not Found	High	0.006	2.681	2	1	1	1	526	57.5	5.64	1.94	1	0	1.024	0.933242	59.42	101.2	98.8	52.61		12691	46098.8	17146.7		1
948	P38631	1,3-beta-glucan synthase component FKS1	High	High	High	High	High	0	140.756	20	31	111	31	1876	214.7	7.23	253.91	31	0	1.169	0.933321	104.59	128.4	71.6	0.3	32.93	1.00008e+07	1.66981e+07	4.13077e+06	3.60883e+06	1
967	P27680	Ubiquinone biosynthesis O-methyltransferase, mitochondrial	High	Peak Found	Peak Found	Not Found	Medium	0.011	2.257	3	1	1	1	312	36.3	6.98	1.94	1	0	1.761	0.933801	24.43	127.6	72.4	22.99		41199.4	95091.9	25814.8		1
734	P31380	ATP-dependent helicase FUN30	High	High	High	Peak Found	High	0	15.459	6	6	12	6	1131	128.4	5.41	21.28	6	0	1.806	0.9344	68.21	139.9	60.1	6.52	35.07	261464	396363	78012.3	70375.4	1
867	Q12176	Ribosome biogenesis protein MAK21	High	High	High	High	High	0	15.804	6	4	9	4	1025	116.6	5.02	23.03	4	0	1.135	0.9344	99.62	132.8	67.2	14.67	16.47	317501	428619	120594	82837.6	1
932	P40046	Vacuolar transporter chaperone 1	High	Peak Found	High	Peak Found	Medium	0.015	2.174	5	1	2	1	129	14.4	10.52	0	1	0	1.829	0.9344	69.83	129.3	70.7	22.61	68.48	439969	1.00985e+06	156011	244059	1
683	Q12246	Sphingoid long chain base kinase 4	High	High	High	High	High	0	19.323	11	5	10	5	624	69.6	6.44	24.59	5	0	1.784	0.934897	45.09	142.4	57.6	2.55	6.44	283793	455129	110591	54887.5	1
313	P34077	Nucleoporin NIC96	High	High	High	Peak Found	High	0	10.727	5	4	6	4	839	96.1	6.83	9.12	4	0	1.861	0.935094	57.54	176.6	23.4	9.33	5.27	196816	373449	25185.7	14752.3	1
420	P32340	Rotenone-insensitive NADH-ubiquinone oxidoreductase, mitochondrial	High	High	High	Peak Found	High	0	8.631	8	3	6	3	513	57.2	9.44	13.71	3	0	1.842	0.935094	72.42	161.9	38.1	0.41	50.95	188395	311403	28365.8	32791.9	1
704	P35844	Oxysterol-binding protein homolog 4	High	High	Peak Found	Peak Found	High	0	4.308	4	2	3	2	434	49.5	6.02	5.96	2	0	1.817	0.935094	35.84	141.6	58.4	25.09	50.05	154039	178924	34312.9	39088.2	1
857	P47117	Actin-related protein 3	High	High	High	High	High	0	6.031	7	2	6	2	449	49.5	5.8	12.34	2	0	1.81	0.935094	40.35	133.3	66.7	20.46	23.26	129897	161378	44562.6	33760.9	1
968	Q03705	EKC/KEOPS complex subunit CGI121	High	High	High	High	High	0	12.08	25	4	8	4	181	20.6	6.21	17.82	4	0	1.771	0.935094	43.03	127.6	72.4	24.93	15.67	205519	487922	116668	79235.6	1
971	P53909	Adenine deaminase	High	High	Peak Found	Peak Found	High	0.004	2.795	4	1	2	1	347	39.6	5.4	5.45	1	0	1.757	0.935094	53.02	127.5	72.5	11.79	51.24	34988.1	49215.7	25069.2	6378.82	1
974	P21560	Protein CBP3, mitochondrial	High	High	High	High	High	0	14.023	13	4	12	4	335	39.1	9.35	25.36	4	0	1.82	0.935094	43.5	127.3	72.7	9.62	36.85	491576	936603	215603	199821	1
1223	P38069	Alpha-1,2-mannosyltransferase MNN2	High	High	High	High	High	0	46.965	22	13	29	13	597	67.7	6.27	60.87	13	0	1.174	0.935094	83.89	113.2	86.8	7.18	27	2.60773e+06	4.7993e+06	1.62289e+06	1.29855e+06	1
317	P15625	Phenylalanine--tRNA ligase alpha subunit	High	High	High	Peak Found	High	0	13.431	15	5	7	5	503	57.5	5.78	18.85	5	0	1.842	0.935621	91.54	176.4	23.6	4.58	81.55	179072	317660	44812.8	6541.44	1
852	P29704	Squalene synthase ERG9	High	High	High	High	High	0	40.791	27	11	30	11	444	51.7	5.9	70.06	11	0	1.818	0.939546	97.9	133.6	66.4	2.05	26.52	4.93398e+06	7.96813e+06	1.87367e+06	1.48876e+06	1
975	P40463	Protein VHS2	High	High	Peak Found	Peak Found	High	0	5.28	4	1	2	1	436	47.9	9.19	3.13	1	0	1.752	0.939814	32.75	127.3	72.7	38.21	39.56	23550.9	68146.1	12452.6	12028.5	1
980	P53550	m7GpppN-mRNA hydrolase	Peak Found	High	Peak Found	Not Found	High	0	5.259	2	1	1	1	970	108.6	5.88	2.7	1	0	1.736	0.939814	44.77	126.9	73.1	40.88		26948.9	81240.5	19573		1
1319	P13259	Choline-phosphate cytidylyltransferase	High	High	High	High	High	0	19.213	14	5	16	5	424	49.4	8.7	31.02	5	0	1.166	0.939814	62.59	108.1	91.9	4.68	1.59	417776	742160	347338	184631	1
1395	Q02948	Vacuolar protein sorting-associated protein 30	High	High	Peak Found	Peak Found	High	0.008	2.4	1	1	2	1	557	63.2	5.07	2.14	1	0	1.045	0.939814	73.11	102.2	97.8	8.91	65.76	98324.4	185439	56694.9	84394.6	1
457	P32656	Glutathione-specific gamma-glutamylcyclotransferase	High	High	Peak Found	High	High	0.001	3.64	13	2	3	2	232	26.3	6.16	5.05	2	0	1.765	0.939932	25.27	159.4	40.6	32.17	27.03	103244	108031	16112.4	12898.8	1
479	Q12449	Hsp90 co-chaperone AHA1	High	High	High	High	High	0	10.366	12	3	10	3	350	39.4	7.47	20.08	3	0	1.123	0.939932	59.7	158	42	8.55	48.63	184836	346860	34186.9	38063.3	1
591	P53878	Uncharacterized oxidoreductase YNL181W	High	High	Not Found	Peak Found	High	0.001	3.701	4	2	2	2	407	46.5	9.32	1.95	2	0	1.787	0.939932	36.75	149.2	50.8	12.77		128269	255603		24353.2	1
700	Q12000	Translation machinery-associated protein 46	High	High	High	High	High	0	9.741	9	3	6	3	345	39.5	9.33	8.9	3	0	1.731	0.939932	19.23	141.8	58.2	2.07	32.41	379143	612164	113669	98532.2	1
800	P39078	T-complex protein 1 subunit delta	High	High	High	High	High	0	50.415	28	11	46	11	528	57.6	7.93	125.27	11	0	1.189	0.939932	79.51	136.9	63.1	6.04	12.47	2.71051e+06	4.13696e+06	1.22569e+06	558338	1
883	Q12697	Vacuolar cation-transporting ATPase YPK9	High	High	Peak Found	Peak Found	High	0	9.924	2	3	6	3	1472	166.6	6.14	13.01	3	0	1.858	0.939932	81.65	132	68	0.33	18.68	136913	228690	57904.1	41057.2	1
899	P32563	V-type proton ATPase subunit a, vacuolar isoform	High	High	High	High	High	0	86.367	25	19	75	19	840	95.5	5.48	155.66	19	0	1.19	0.939932	96.98	131	69	14.23	12.03	7.38621e+06	1.00342e+07	3.02617e+06	1.95096e+06	1
952	P34248	Probable intramembrane protease YKL100C	High	High	High	Peak Found	High	0	4.695	2	1	4	1	587	67.5	5.57	9.79	1	0	1.789	0.939932	20.04	128.3	71.7	19.87	6.88	107731	237670	68186.8	33629.6	1
976	Q12447	Polyamine N-acetyltransferase 1	High	High	Peak Found	Peak Found	High	0	7.194	12	2	2	2	191	21.9	5.82	5.92	2	0	1.119	0.939932	22.95	127.2	72.8	34.62	19.08	223717	225662	81506	58129.1	1
1052	P47075	Vacuolar transporter chaperone 4	High	High	High	High	High	0	32.048	17	12	26	12	721	83.1	6.83	52.17	12	0	1.184	0.939932	82.94	123.7	76.3	13.3	34.57	2.42814e+06	4.87512e+06	1.20131e+06	1.07561e+06	1
1079	P32775	1,4-alpha-glucan-branching enzyme	High	High	Peak Found	Peak Found	High	0	6.349	3	2	3	2	704	81.1	6.16	4.59	2	0	1.794	0.939932	97.91	122.4	77.6	37.42	93.88	87041.9	248827	30467.2	81970.5	1
1113	P38629	Replication factor C subunit 3	High	High	High	High	High	0	28.868	28	8	19	8	340	38.2	6.44	42.2	8	0	1.188	0.939932	62.62	120.2	79.8	18.9	12.83	557860	1.21367e+06	362138	236169	1
1145	P43123	UDP-N-acetylglucosamine pyrophosphorylase	Peak Found	High	Peak Found	High	High	0	7.058	6	3	3	3	477	53.4	7.42	4.58	3	0	1.786	0.939932	96.28	118.1	81.9	8.2	68.39	58734.8	109677	23852.5	37253.8	1
1177	P01123	GTP-binding protein YPT1	High	High	High	High	High	0	15.198	22	5	16	4	206	23.2	5.33	30.62	5	1	1.807	0.939932	58.37	116	84	22.3	38.72	2.20502e+06	2.66713e+06	962316	917579	1
1238	P32368	Phosphatidylinositol-3-phosphatase SAC1	High	High	High	High	High	0	71.371	32	15	48	15	623	71.1	7.71	116.71	15	0	1.81	0.939932	85.51	112.1	87.9	7.33	33.94	5.48878e+06	8.22578e+06	2.99224e+06	2.65418e+06	1
1306	P06197	CDP-diacylglycerol--inositol 3-phosphatidyltransferase	High	High	High	High	High	0	4.607	5	1	8	1	220	24.8	8.69	18.64	1	0	1.188	0.939932	46.51	108.6	91.4	19.82	48.05	716098	897825	343944	379408	1
1364	Q12256	Polyamine transporter 4	Peak Found	High	High	Peak Found	High	0	7.097	6	3	4	3	659	73.2	8.21	9.59	3	0	1.118	0.939932	56.57	104.3	95.7	68.21	36.15	91378.9	435022	102349	93853.2	1
1376	P53241	Vitamin H transporter	Peak Found	High	Not Found	Peak Found	Medium	0.032	1.808	1	1	1	1	593	69	8.85	0	1	0	1.077	0.939932	35.24	103.7	96.3	32.7		16177.4	43076.2		9671.5	1
1402	Q06639	Chromatin structure-remodeling complex protein RSC3	Peak Found	High	Not Found	Peak Found	Medium	0.021	2.077	1	1	1	1	885	101.7	8.03	1.94	1	0	1.022	0.939932	17.8	101.1	98.9	16.86		30542.1	64523.4		17144.4	1
1405	P34221	Protein phosphatase 2C homolog 3	Peak Found	High	Peak Found	Peak Found	Medium	0.011	2.271	2	1	1	1	468	51.3	4.63	1.91	1	0	1.021	0.939932	31.36	101	99	34	22.12	25318.6	68734.8	25341.6	18884.9	1
646	P05317	60S acidic ribosomal protein P0	High	High	High	High	High	0	54.778	32	10	110	10	312	33.7	4.83	271.79	10	0	1.8	0.940195	103.01	144.5	55.5	2.64	56.87	3.3653e+07	5.38991e+07	1.81813e+07	4.21454e+06	1
1492	P41819	Dimethyladenosine transferase	Peak Found	High	High	High	High	0	7.653	8	2	4	2	318	35.9	9.55	11.61	2	0	1.072	0.940195	70.94	93	107	76.6	34.84	45158.9	252503	69305.1	62312.6	1
949	P18480	SWI/SNF chromatin-remodeling complex subunit SNF5	High	High	Peak Found	Peak Found	High	0	5.438	1	1	2	1	905	102.5	8.28	5.55	1	0	1.794	0.940376	42.65	128.4	71.6	4.71	40.31	26620.4	41402.3	10021	9792.19	1
831	P53136	Ribosome biogenesis protein NSA1	High	High	High	High	High	0	10.968	10	4	8	4	463	51.9	7.84	19.24	4	0	1.718	0.9423	72.45	135.1	64.9	13.89	31.24	511316	697992	166516	141848	1
624	Q03219	Uncharacterized protein YMR178W	High	High	High	Peak Found	High	0	12.085	15	3	5	3	274	31.1	6.05	9.73	3	0	1.795	0.942453	14.97	146.4	53.6	7.57	29.13	203892	377302	90778.6	32490.1	1
534	P07560	Ras-related protein SEC4	High	High	High	High	High	0	20.675	31	5	23	4	215	23.5	7.09	57.38	5	0	1.784	0.942829	61.29	153.4	46.6	16.73	32.95	1.15782e+06	1.51762e+06	230347	201306	1
606	P38132	DNA replication licensing factor MCM7	High	High	Peak Found	Peak Found	High	0	8.06	3	2	3	2	845	94.9	5.3	7.56	2	0	1.784	0.942829	4.57	147.9	52.1	6	4.39	91884.5	166293	30624.3	17716.2	1
614	Q03640	Tricalbin-3	High	High	High	High	High	0	44.123	11	12	26	12	1545	171	7.14	62.13	12	0	1.197	0.942829	83.77	146.9	53.1	6.74	25.89	926172	1.39976e+06	359743	135036	1
729	P26637	Leucine--tRNA ligase, cytoplasmic	High	High	High	High	High	0	28.181	11	10	18	10	1090	124.1	5.85	33.25	10	0	1.784	0.942829	55.85	140.3	59.7	14.77	33.77	697256	1.42952e+06	241658	213799	1
777	Q02821	Importin subunit alpha	High	High	High	High	High	0	6.925	5	3	6	3	542	60.4	4.91	7.59	3	0	1.199	0.942829	119.09	138	62	13.46	31.72	579383	1.16593e+06	213578	183248	1
791	P53313	Protein SDA1	High	High	High	Peak Found	High	0	14.018	9	4	8	4	767	86.6	6.93	16.47	4	0	1.136	0.942829	44.07	137.4	62.6	23.59	74.08	192402	447925	173645	29497	1
807	P21242	Probable proteasome subunit alpha type-7	High	Peak Found	High	Not Found	High	0	5.951	7	2	2	2	288	31.5	5.19	4.4	2	0	1.808	0.942829	0	136.7	63.3	62.27		143589	92768.2	38833.3		1
827	P23291	Casein kinase I homolog 1	High	High	High	High	High	0	33.255	21	7	20	6	538	61.7	9.04	45.09	7	1	1.773	0.942829	78.66	135.3	64.7	15.54	29.55	971407	1.29514e+06	314836	261585	1
872	Q3E757	60S ribosomal protein L11-B	High	High	High	High	High	0	23.489	31	7	36	7	174	19.7	9.92	75.19	7	0	1.78	0.942829	112.71	132.6	67.4	1.57	42.19	1.68441e+07	2.73875e+07	5.83189e+06	5.86664e+06	1
877	P32387	54S ribosomal protein L41, mitochondrial	Peak Found	High	Peak Found	Peak Found	High	0	6.794	12	2	3	2	263	30.5	9.42	5.04	2	0	1.732	0.942829	47.05	132.3	67.7	13.6	43.69	70727.2	142604	27132.7	27938.7	1
884	P0CX24	60S ribosomal protein L20-B	High	High	High	High	High	0	45.341	45	9	88	9	172	20.4	10.3	210.15	9	0	1.793	0.942829	72.83	132	68	1.67	49.74	3.31827e+07	5.38829e+07	1.09635e+07	1.24279e+07	1
939	P53154	Membrane-bound O-acyltransferase GUP1	High	Peak Found	Peak Found	Peak Found	Medium	0.026	1.93	1	1	1	1	560	65.3	9.47	2.05	1	0	1.803	0.942829	45.76	128.7	71.3	37.17	52.97	139891	135765	37433.9	44726.8	1
942	P32843	Mitochondrial escape protein 2	High	High	High	Peak Found	High	0	25.109	11	8	15	8	850	96.6	8.92	36.5	8	0	1.778	0.942829	59.21	128.6	71.4	3.96	25.07	533689	838990	225744	175601	1
946	Q12674	Probable phospholipid-transporting ATPase DNF3	High	Peak Found	Peak Found	Peak Found	Medium	0.035	1.752	0	1	1	1	1656	188.2	6.76	0	1	0	1.798	0.942829	52.12	128.5	71.5	1.42	47.33	16310.6	26575.8	5937.41	6474.6	1
947	P43682	Protein transport protein SFT1	Peak Found	Peak Found	High	High	Medium	0.024	1.967	9	1	2	1	97	11	9.86	0	1	0	1.797	0.942829	60.01	128.5	71.5	29.12	63.12	121563	133086	31797.6	45157.3	1
959	P48837	Nucleoporin NUP57	High	High	High	High	High	0	9.142	5	3	6	3	541	57.5	9.58	10.92	3	0	1.697	0.942829	45.05	127.9	72.1	3.23	49.02	421802	669901	151717	169977	1
973	P32528	Urea amidolyase	High	High	Peak Found	High	High	0	10.64	3	4	5	4	1835	201.7	5.62	11.64	4	0	1.041	0.942829	58.44	127.4	72.6	73.27	51.86	28796.8	150830	18574.5	21792.3	1
978	Q08972		High	High	High	High	High	0	94.114	32	28	65	28	1196	134.2	5.86	145.19	28	0	1.204	0.942829	78.32	127.1	72.9	8.14	24.48	3.67187e+06	5.4403e+06	1.56272e+06	1.20518e+06	1
984	P43563	CBK1 kinase activator protein MOB2	High	High	High	Peak Found	Medium	0.029	1.85	8	1	3	1	287	33.3	9.6	2.14	1	0	1.725	0.942829	30.71	126.6	73.4	30.44	8.78	52443.5	56301.2	21490.3	13229.6	1
1005	Q08157	Uncharacterized membrane protein YOL019W	Peak Found	High	Not Found	Peak Found	High	0.001	3.223	3	1	2	1	551	60.9	6.38	4.15	1	0	1.69	0.942829	6.75	125.6	74.4	6.43		36781.6	66979.4		11596.7	1
1026	P08524	Farnesyl pyrophosphate synthase	High	High	High	High	High	0	5.833	8	2	4	2	352	40.5	5.47	6.05	2	0	1.024	0.942829	46.06	124.8	75.2	6.38	42.02	80252	121911	31850.4	31951.7	1
1117	P47190	Dolichyl-phosphate-mannose--protein mannosyltransferase 3	High	High	High	Peak Found	High	0	8.964	5	4	7	3	753	86.3	6.9	15.34	4	0	1.727	0.942829	38.72	119.7	80.3	18.79	22.97	238212	517422	145106	109476	1
1136	P06244	cAMP-dependent protein kinase type 1	High	High	Peak Found	Peak Found	High	0	4.969	5	2	3	2	397	46	5.48	3.66	2	0	1.746	0.942829	45.43	118.6	81.4	36.91	46.14	59063.6	167547	35330	37808.1	1
1297	P25560	Protein RER1	High	High	High	Peak Found	High	0	5.475	18	3	4	3	188	22.3	8.38	1.65	3	0	1.078	0.942829	0	109.1	90.9	126.03	127.49	23990	693027	17743.9	186169	1
1309	P38788	Ribosome-associated complex subunit SSZ1	High	High	High	High	High	0	39.847	24	10	36	10	538	58.2	5.05	77.02	10	0	1.209	0.942829	75.55	108.5	91.5	3.54	29.48	2.10686e+06	3.33171e+06	1.31349e+06	1.09022e+06	1
1313	P27692	Transcription elongation factor SPT5	High	High	High	High	High	0	16.683	6	6	14	6	1063	115.6	5.25	14.26	6	0	1.174	0.942829	45.45	108.4	91.6	4.06	39.63	281053	494889	171566	165897	1
1317	Q03769	Epsin-5	Peak Found	High	High	Peak Found	High	0	8.615	6	2	2	2	411	47.3	6.49	5.75	2	0	1.04	0.942829	122.07	108.2	91.8	11.07	0.28	37169.6	72288.8	31977.8	17315.4	1
1371	P39958	Rab GDP-dissociation inhibitor	Peak Found	High	Peak Found	Not Found	High	0.004	2.811	3	1	1	1	451	51.2	5.99	2.72	1	0	1.082	0.942829	32.84	103.9	96.1	30.58		13836.7	35698.6	14912.9		1
1373	P40218	Uncharacterized protein YMR147W	Peak Found	High	Peak Found	High	Medium	0.031	1.826	5	1	2	1	223	25.9	7.23	3.67	1	0	1.079	0.942829	49.18	103.8	96.2	27.78	53.06	64738	160245	46222.6	55304.1	1
1389	P10662	37S ribosomal protein MRP1, mitochondrial	Peak Found	High	Peak Found	Peak Found	Medium	0.011	2.286	4	1	1	1	321	36.7	9.06	0	1	0	1.05	0.942829	42.85	102.5	97.5	29.65	47.62	35975	39075.5	18259	20004.7	1
1396	P40510	D-3-phosphoglycerate dehydrogenase 2	High	Peak Found	Peak Found	Peak Found	High	0	7.167	9	3	5	1	469	51.2	6.42	11.73	3	0	1.039	0.942829	30.27	101.9	98.1	0.99	28.48	66100.8	111447	48919.9	40007	1
1608	P47133	ER membrane protein complex subunit 2	High	High	High	High	High	0	11.644	14	4	10	4	292	33.8	5.68	22.87	4	0	1.78	0.942829	53.97	75.2	124.8	41.82	13.68	177592	160487	184774	121966	1
638	P38882	U3 small nucleolar RNA-associated protein 9	High	High	High	Peak Found	High	0	11.835	7	4	8	4	575	65.2	4.86	8.74	4	0	1.783	0.943238	74.63	145.3	54.7	12.55	30.32	216530	301297	56135	47171.5	1
463	P25655	General negative regulator of transcription subunit 1	Peak Found	High	Peak Found	High	High	0	12.312	3	5	5	5	2108	240.1	6.44	9.43	5	0	1.149	0.946427	20.41	159	41	6.79	83.05	206681	312122	24248.2	50693.1	1
927	P38688	Signal recognition particle subunit SRP72	High	High	High	High	High	0	23.009	15	7	12	7	640	73.5	9.41	28.38	7	0	1.148	0.946427	50.92	129.6	70.4	29.18	40.09	184084	465162	86251.1	83989.8	1
985	P43611	Outer spore wall protein 7	Peak Found	High	Peak Found	Peak Found	High	0	3.806	2	1	1	1	510	59.3	4.78	2.85	1	0	1.724	0.946427	20.14	126.6	73.4	21.12	14.99	54902.9	123335	31162.1	20956.4	1
1251	P25491	Mitochondrial protein import protein MAS5	High	High	High	Peak Found	High	0	33.991	23	9	19	9	409	44.6	6.3	41.97	9	0	1.214	0.946427	141.31	111.3	88.7	23.47	3.37	1.16957e+06	2.71812e+06	1.05674e+06	547733	1
1326	Q12680	Glutamate synthase	High	High	High	Peak Found	High	0	13.366	3	6	12	6	2145	238	6.58	18.63	6	0	1.192	0.946427	61.69	107.6	92.4	17.59	38.29	476744	617284	256354	242861	1
1337	P36016	Heat shock protein 70 homolog LHS1	High	High	High	Peak Found	High	0.01	2.325	1	1	3	1	881	99.5	5.29	7.5	1	0	1.142	0.946427	11.52	106.6	93.4	4.7	11.33	128904	200514	94372	60237.5	1
1386	Q03305	Protein arginine N-methyltransferase 2	Peak Found	High	High	Peak Found	High	0.007	2.45	2	1	2	1	412	47.4	4.58	3.54	1	0	1.057	0.946427	67.26	102.8	97.2	6.41	60.65	35146.1	53362.4	47055.5	10224.8	1
1428	P33310	ATP-dependent permease MDL1, mitochondrial	Peak Found	High	High	Peak Found	High	0	4.919	3	2	2	2	695	75.9	9.8	0	2	0	1.071	0.946427	60.43	99.6	100.4	45.31	56.81	28430.6	24326.6	12565.1	16003.4	1
504	P40693	Ribosome biogenesis protein RLP7	High	High	High	High	High	0	22.346	31	7	17	7	322	36.5	9.45	40.31	7	0	1.757	0.948614	106.52	156.6	43.4	11.17	61.96	1.26313e+06	1.79243e+06	189480	263653	1
510	P39109	Metal resistance protein YCF1	High	High	High	Peak Found	High	0	29.439	7	9	18	9	1515	171	8.41	41.77	9	0	1.754	0.948614	73.03	155.6	44.4	14.81	41.97	531981	1.09128e+06	214371	63201.7	1
538	P37262	6-phosphogluconolactonase-like protein 2	High	High	Peak Found	High	High	0	8.109	15	3	6	3	315	34.5	6.86	11.56	3	0	1.716	0.948614	37.7	153.1	46.9	11.43	38.06	113716	222308	26870.8	25364.3	1
575	P49367	Homoaconitase, mitochondrial	High	High	High	Peak Found	High	0	12.918	8	4	8	4	693	75.1	7.37	13.91	4	0	1.177	0.948614	37.41	150.7	49.3	26.45	3.47	386038	439580	100292	51910.9	1
696	Q12055	Adenylate kinase isoenzyme 6 homolog FAP7	High	High	Peak Found	Peak Found	High	0	8.823	22	4	5	4	197	22.7	4.67	6.57	4	0	1.694	0.948614	28.64	141.9	58.1	13.55	14.2	277701	559539	129716	57652.7	1
813	P28274	CTP synthase 1	High	High	High	High	High	0	52.601	22	13	45	13	579	64.7	6.01	94.29	13	0	1.76	0.948614	81.35	136.3	63.7	2.51	46.18	3.43093e+06	5.91008e+06	1.08949e+06	1.16665e+06	1
837	O14467	Multiprotein-bridging factor 1	High	High	High	High	High	0	26.318	31	5	23	5	151	16.4	10.61	55.2	5	0	1.753	0.948614	36.25	134.7	65.3	32.67	47.3	3.1562e+06	3.27808e+06	800250	872229	1
979	P33336	Beta-glucan synthesis-associated protein SKN1	Not Found	High	Peak Found	Peak Found	High	0	5.969	4	2	4	1	771	86.2	4.86	7.3	2	0	1.744	0.948614	71.88	127.1	72.9		61.69		34901.1	7059.8	9777.81	1
986	P29311	Protein BMH1	High	High	Peak Found	High	High	0	10.566	16	4	7	4	267	30.1	4.88	8.3	4	0	1.162	0.948614	71.59	126.6	73.4	46.38	45.74	239888	201820	66290.6	70496	1
1004	P38146	GTP-binding protein YPT10	High	High	Peak Found	Peak Found	High	0	5.263	12	2	3	2	199	21.8	7.3	5.03	2	0	1.663	0.948614	57.91	125.7	74.3	51.51	18.46	34832.5	124269	24743	17489.1	1
1229	P40495	Homoisocitrate dehydrogenase, mitochondrial	High	High	Peak Found	High	High	0	16.305	16	5	8	5	371	40	8.02	18.63	5	0	1.153	0.948614	92.44	112.7	87.3	28.72	12.53	171419	430245	166773	75906.9	1
1365	Q02555	Ribonuclease 3	Not Found	High	Peak Found	Peak Found	Medium	0.035	1.733	2	1	1	1	471	54	8.59	0	1	0	1.089	0.948614	5.11	104.3	95.7		4.87		11136.9	5959.38	3024.13	1
1628	P35691	Translationally-controlled tumor protein homolog	High	High	High	Peak Found	High	0	9.382	18	3	7	3	167	18.7	4.56	7.11	3	0	1.193	0.948614	111.52	69.9	130.1	31.62	33.4	305832	322640	334074	293921	1
955	P53600	Coatomer subunit zeta	Peak Found	High	Not Found	Peak Found	Medium	0.019	2.136	7	1	1	1	189	21.7	5.16	2.51	1	0	1.778	0.949283	68.52	128	72	59.33		9306.4	37835.5		4166.38	1
668	Q04439	Myosin-5	High	High	Peak Found	Peak Found	High	0	9.437	3	3	4	3	1219	136.8	9.29	8.94	3	0	1.756	0.951711	38.35	143.4	56.6	0.15	49.6	172860	286771	44222.5	50013.6	1
1019	Q08962	60S ribosome subunit biogenesis protein NIP7	High	Not Found	Peak Found	Peak Found	Medium	0.027	1.893	5	1	1	1	181	20.4	9.26	1.61	1	0	1.668	0.951864	23.93	125	75		22.54	47920.9		22899	17168.6	1
631	P43638	MAP-homologous protein 1	High	High	Peak Found	Peak Found	High	0	4.805	2	2	2	2	1398	155.1	7.3	3.91	2	0	1.067	0.952579	43.33	145.9	54.1	11.86	40.47	53869.4	75700.5	12809.8	12547	1
998	Q03862	Probable metalloprotease ARX1	High	High	Peak Found	Peak Found	High	0	3.814	2	1	2	1	593	65.2	7.2	4.06	1	0	1.703	0.952579	48.71	126	74	6.11	45.89	68592.8	104594	25784.9	27483.3	1
1040	P05375	Phosphatidyl-N-methylethanolamine N-methyltransferase	Peak Found	High	Peak Found	Peak Found	High	0	6.374	7	1	1	1	206	23.1	8.98	3.14	1	0	1.64	0.952579	91.21	124.2	75.8	77.79	9.64	25076	143626	28450.6	13492.3	1
1046	P04807	Hexokinase-2	Peak Found	Peak Found	High	High	High	0	11.556	10	4	4	3	486	53.9	5.3	10.32	4	1	1.205	0.952579	78.35	123.8	76.2	53.02	16.31	298332	1.09097e+06	226917	155530	1
1349	P43590	Uncharacterized peptidase YFR006W	High	High	Peak Found	Peak Found	Medium	0.031	1.81	2	1	2	1	535	61.7	6.16	4.01	1	0	1.109	0.952579	43.99	105.2	94.8	21.47	46.21	95185.4	214888	66677.5	71438.1	1
1369	Q2V2P9	Cytochrome c oxidase subunit 26, mitochondrial	High	Peak Found	Peak Found	Not Found	Medium	0.014	2.206	17	1	1	1	66	7.4	10.92	2.12	1	0	1.083	0.952579	21.66	104	96	20.45		24009.5	29832.2	17941.9		1
1380	P32445	Single-stranded DNA-binding protein RIM1, mitochondrial	Peak Found	Peak Found	Peak Found	High	High	0.01	2.333	7	1	1	1	135	15.4	8.34	0	1	0	1.068	0.952579	52.83	103.3	96.7	43.32	62.13	54043.3	47712.2	21538.9	30057.1	1
1382	P53729	Zinc-regulated GTPase metalloprotein activator 1	High	High	Peak Found	Peak Found	High	0	6.262	4	1	2	1	429	48.1	5.11	5.64	1	0	1.066	0.952579	37.06	103.2	96.8	16.48	38.26	54956.1	115462	41126.9	38940.2	1
1390	Q03940	RuvB-like protein 1	High	High	High	High	High	0	32.095	29	10	28	10	463	50.4	5.87	49.6	10	0	1.232	0.952579	71.13	102.5	97.5	0.78	17.21	845828	1.42185e+06	669637	464893	1
1410	Q12328	Mitochondrial import inner membrane translocase subunit TIM22	High	High	High	High	High	0	4.673	12	2	5	2	207	21.9	6.13	10.42	2	0	1.137	0.952579	53.3	100.8	99.2	14.84	25.75	103437	212300	88073.6	69202.2	1
475	Q02795	Dolichyl-diphosphooligosaccharide--protein glycosyltransferase subunit SWP1	High	High	Peak Found	High	High	0	7.733	8	2	4	2	286	31.6	7.03	11.28	2	0	1.198	0.953542	24.2	158.3	41.7	0.18	100.54	294417	488219	29793.2	95857.4	1
815	P38205	Multisite-specific tRNA:(cytosine-C(5))-methyltransferase	High	High	High	High	High	0	21.328	13	7	11	7	684	77.8	7.36	21.57	7	0	1.658	0.953542	67.92	136.2	63.8	12.57	28.86	456837	635544	148852	122418	1
1062	P47169	Sulfite reductase	High	High	High	High	High	0	21.143	6	7	10	7	1442	161.1	5.49	16.47	7	0	1.196	0.953542	61.99	123.2	76.8	40.79	37.47	203604	612957	122003	114137	1
1195	P08067	Cytochrome b-c1 complex subunit Rieske, mitochondrial	High	High	High	High	High	0	10.622	19	3	14	3	215	23.4	8.07	33.17	3	0	1.737	0.953542	75.36	114.9	85.1	11.68	34.2	639281	1.25423e+06	376522	335291	1
1381	P53731	Actin-related protein 2/3 complex subunit 2	High	High	Not Found	Peak Found	High	0.003	2.942	3	1	2	1	342	39.5	6.81	4.47	1	0	1.068	0.953542	3.33	103.3	96.7	3.18		49859.5	86705.5		24295.2	1
1029	P43560	Membrane-anchored lipid-binding protein LAM5	High	Peak Found	Peak Found	Peak Found	High	0	4.927	3	1	1	1	674	76.3	5.02	3.21	1	0	1.652	0.956037	23.91	124.6	75.4	7.96	23.78	37780.8	56121.4	17083.2	13041.5	1
1355	P32378	4-hydroxybenzoate polyprenyltransferase, mitochondrial	Peak Found	High	Peak Found	Peak Found	High	0.002	3.013	2	1	2	1	372	41	9.98	2.06	1	0	1.107	0.956037	37.22	105.1	94.9	47.04	47.28	107358	89379.2	45399	49472.1	1
1360	P52867	Dolichyl-phosphate-mannose--protein mannosyltransferase 5	High	High	High	Peak Found	High	0	4.12	3	2	4	2	743	84.7	7.88	4.27	2	0	1.101	0.956037	22.97	104.8	95.2	9.08	23.06	23783.6	34767.8	22365.7	8750.11	1
1053	P18900	Hexaprenyl pyrophosphate synthase, mitochondrial	High	High	Peak Found	High	High	0	9.527	8	3	5	3	473	52.5	8.84	8.49	3	0	1.719	0.956564	49.87	123.7	76.3	12.73	23.55	212233	294584	94731.4	72077.9	1
580	Q01560	Serine/arginine (SR)-type shuttling mRNA binding protein NPL3	High	High	High	High	High	0	16.21	11	4	14	4	414	45.4	5.54	26.58	4	0	1.73	0.956622	121.68	150.3	49.7	24.52	25.02	855094	2.01797e+06	263947	205189	1
982	P16603	NADPH--cytochrome P450 reductase	High	High	High	High	High	0	62.497	30	14	55	14	691	76.7	5.19	135.59	14	0	1.241	0.9578	47.54	126.7	73.3	5.25	0.28	3.31897e+06	5.12255e+06	1.73501e+06	939513	1
451	P15303	Protein transport protein SEC23	High	High	Peak Found	Peak Found	High	0	8.273	5	3	4	3	768	85.3	5.66	6.8	3	0	1.13	0.958492	34.91	159.9	40.1	7.57	38	106849	197727	20086.8	18945	1
543	Q12499	Nucleolar protein 58	High	High	High	High	High	0	74.851	33	16	51	16	511	56.9	8.94	113.74	16	0	1.722	0.958492	102.11	152.8	47.2	11.63	21.43	3.33799e+06	4.70624e+06	763981	563701	1
571	P46944	Trafficking protein particle complex III-specific subunit 85	Peak Found	High	Not Found	Peak Found	High	0	4.71	2	2	2	2	698	80.4	6.42	0	2	0	1.688	0.958492	40.03	150.9	49.1	0.83		26529.6	44630.1		4415.09	1
712	P32895	Ribose-phosphate pyrophosphokinase 1	High	High	High	High	High	0	17.796	19	6	14	6	427	47	5.73	27.78	6	0	1.725	0.958492	57.8	141.4	58.6	18.21	23.24	1.02627e+06	1.31699e+06	296160	224324	1
849	P21147	Acyl-CoA desaturase 1	High	High	High	High	High	0	74.849	24	13	60	13	510	58.4	8.95	149.22	13	0	1.725	0.958492	110.95	133.7	66.3	2.35	28.27	1.09255e+07	1.87784e+07	4.21616e+06	3.4375e+06	1
887	P41338	Acetyl-CoA acetyltransferase	High	High	High	High	High	0	15.171	12	4	8	4	398	41.7	7.39	19.81	4	0	1.724	0.958492	25.6	131.8	68.2	0.25	25.12	162787	269689	65761	51191.6	1
912	P06168	Ketol-acid reductoisomerase, mitochondrial	High	High	High	High	High	0	71.728	44	15	85	15	395	44.3	9.04	193.12	15	0	1.245	0.958492	100.59	130.5	69.5	2.9	7.43	1.491e+07	2.3792e+07	6.90609e+06	4.17062e+06	1
936	P19073	Cell division control protein 42	High	High	High	High	High	0	7.278	17	3	9	3	191	21.3	6.74	11.76	3	0	1.65	0.958492	108.15	129.1	70.9	7.91	16.28	367676	683677	224630	96908.4	1
1054	Q99260	GTP-binding protein YPT6	Peak Found	High	Peak Found	Peak Found	High	0	5.777	9	2	9	1	215	24.4	5.83	18.43	2	0	1.62	0.958492	51.07	123.7	76.3	0.04	46.07	50167.8	83450.3	20684.6	22109.5	1
1087	Q08237	RNA exonuclease 4	High	High	Peak Found	Peak Found	High	0	4.26	7	2	3	2	289	32.9	9.85	1.8	2	0	1.624	0.958492	32.95	121.7	78.3	30.18	39.51	56290.5	60669.1	20485.9	19773.5	1
1350	P25340	Delta(24(24(1)))-sterol reductase ERG4	Peak Found	High	Peak Found	Peak Found	High	0.003	2.927	2	1	1	1	473	56	8.6	1.99	1	0	1.11	0.958492	72.76	105.2	94.8	16.89	68.47	91737.3	193893	51438.6	80459.4	1
1728	P35996	54S ribosomal protein L38, mitochondrial	High	High	Peak Found	Peak Found	High	0	6.553	27	3	3	3	138	14.9	9.82	4.32	3	0	1.72	0.958492	132.05	10.8	189.2	27.64	16.82	175510	433579	3.10832e+06	2.14598e+06	1
1318	P19454	Casein kinase II subunit alpha'	Peak Found	High	Peak Found	High	High	0	3.882	5	2	2	2	339	39.4	8.53	2.02	2	0	1.088	0.958749	33.43	108.2	91.8	8.94	30.8	36710	53775.5	21956.4	18584.1	1
1477	Q12377	26S proteasome regulatory subunit RPN6	High	High	High	Peak Found	High	0	7.943	5	2	3	2	434	49.7	6.28	7.34	2	0	1.183	0.958749	42.36	94.5	105.5	30.78	10.15	100706	260598	122165	76679.9	1
617	P04051	DNA-directed RNA polymerase III subunit RPC1	High	High	Peak Found	Peak Found	High	0	7.39	2	3	4	3	1460	162.2	8.24	9.08	3	0	1.082	0.959596	54.5	146.7	53.3	5.55	88.05	78661.3	141459	13417.3	31360.5	1
801	P39986	Endoplasmic reticulum transmembrane helix translocase	High	High	High	High	High	0	83.984	22	20	70	20	1215	135.2	6.6	173.75	20	0	1.716	0.959596	106.05	136.9	63.1	3.8	34.11	7.85111e+06	1.37741e+07	2.72077e+06	2.41936e+06	1
900	Q12460	Nucleolar protein 56	High	High	High	High	High	0	77.075	45	18	47	18	504	56.8	8.9	118.61	18	0	1.716	0.959596	92.09	131	69	3.14	13.5	6.03437e+06	1.04878e+07	2.7632e+06	1.81931e+06	1
1063	P22137	Clathrin heavy chain	High	High	High	High	High	0	105.797	21	28	69	28	1653	187.1	5.24	153.6	28	0	1.716	0.959596	74	123.2	76.8	7.76	26	2.68457e+06	3.99895e+06	1.23033e+06	970153	1
393	P14843	Phospho-2-dehydro-3-deoxyheptonate aldolase, phenylalanine-inhibited	High	High	High	Peak Found	High	0	6.172	9	2	3	2	370	41	7.39	6.84	2	0	1.685	0.959654	29.01	165.2	34.8	18.73	29.01	169430	215791	23775.1	19597	1
437	P07262	NADP-specific glutamate dehydrogenase 1	High	High	Peak Found	Peak Found	High	0	20.239	18	6	7	6	454	49.5	5.69	17.74	6	0	1.655	0.959654	42.83	160.7	39.3	3.64	37.53	335130	586632	60059.6	56238	1
839	P35196	Dehydrodolichyl diphosphate synthase complex subunit RER2	Peak Found	High	High	Peak Found	High	0	12.281	17	4	5	4	286	32.7	7.78	12.52	4	0	1.125	0.959654	56.49	134.6	65.4	54.06	74.2	61225.9	227752	74548.8	12635.4	1
870	P20424	Signal recognition particle subunit SRP54	High	High	High	High	High	0	11.433	7	4	10	4	541	59.6	8.6	15.01	4	0	1.224	0.959654	117.8	132.7	67.3	30.82	37.71	290187	751361	130933	122937	1
1020	P40452	Cytochrome c oxidase assembly factor 1	High	High	Peak Found	High	Medium	0.011	2.264	5	1	3	1	197	22	9.55	5.57	1	0	1.666	0.959654	27.11	125	75	30.02	24.12	64530.2	165116	37862.3	29050	1
1265	P21243	Proteasome subunit alpha type-1	High	High	Peak Found	Peak Found	High	0	12.567	14	3	4	3	252	28	6.24	9.97	3	0	1.15	0.959654	48.58	110.8	89.2	13.52	47.14	130832	179548	63312.4	68832.3	1
1345	P47068	Myosin tail region-interacting protein MTI1	High	High	High	High	High	0	9.846	3	4	8	4	1157	128.2	5.26	14.74	4	0	1.192	0.959654	80.95	105.5	94.5	22.89	62.39	146986	338773	90347	126666	1
1433	P40477	Nucleoporin NUP159	High	Peak Found	High	Peak Found	High	0	3.801	2	2	3	2	1460	158.8	4.83	7.22	2	0	1.109	0.959654	59.41	98.6	101.4	51.72		49251.9	38032.1		17552.5	1
1095	P38011	Guanine nucleotide-binding protein subunit beta-like protein	High	High	High	High	High	0	14.775	17	3	13	3	319	34.8	6.24	35.13	3	0	1.256	0.960794	126.49	121.2	78.8	7.96	21.87	558319	829354	274993	204184	1
1231	P17709	Glucokinase-1	High	High	High	Peak Found	High	0	14.186	8	5	10	5	500	55.3	6.19	14.07	5	0	1.631	0.961303	82.6	112.6	87.4	6.74	15.42	418953	633183	260445	176247	1
1174	P17255	V-type proton ATPase catalytic subunit A	High	High	High	High	High	0	98.649	29	26	76	26	1071	118.6	6.16	161.07	26	0	1.257	0.961377	81.81	116.2	83.8	1.95	28.72	5.27133e+06	8.52535e+06	2.85721e+06	2.34508e+06	1
392	P40064	Nucleoporin NUP157	Peak Found	High	Peak Found	Not Found	High	0	5.926	2	2	2	2	1391	156.6	6.44	4.05	2	0	1.635	0.962352	5.38	165.3	34.7	5.75		82129.2	148107	16791.8		1
554	Q02892	Nucleolar GTP-binding protein 1	High	High	High	High	High	0	39.165	19	11	37	11	647	74.4	8.79	80.76	11	0	1.703	0.962462	65.98	152.2	47.8	3.39	44.03	2.34628e+06	4.09209e+06	511922	529943	1
1021	Q01080	DNA-directed RNA polymerase I subunit RPA49	High	High	High	High	High	0	15.477	9	4	9	4	415	46.6	9.54	21.78	4	0	1.218	0.962462	77.61	125	75	16.67	20.92	222094	467945	162958	65757.7	1
1358	P53722	Mitochondrial inner membrane protease ATP23	High	High	Peak Found	Peak Found	High	0.003	2.965	6	1	2	1	227	26.9	7.64	1.86	1	0	1.104	0.962462	80.91	104.9	95.1	16.1	73.81	35981.9	47591.2	15256	26400	1
1495	P07283	Phosphomannomutase	High	High	High	High	High	0	31.163	35	7	21	7	254	29	5.24	44.99	7	0	1.703	0.962462	104.1	92.6	107.4	6.77	2.35	764447	1.39878e+06	856413	481296	1
1027	P32582	Cystathionine beta-synthase	High	High	High	High	High	0	16.814	15	6	11	6	507	56	6.7	16.54	6	0	1.631	0.962745	55.71	124.8	75.2	16.35	41.56	335108	702797	156867	156263	1
1351	Q04409	Putative glucokinase-2	High	High	Peak Found	High	High	0.005	2.723	2	1	3	1	500	55.9	6.27	3.79	1	0	1.11	0.963037	29.66	105.2	94.8	33.44	27.36	39362.4	105978	34733.7	27942.5	1
1547	P40484	DBF2 kinase activator protein MOB1	High	High	High	High	High	0	12.602	20	4	8	4	314	35.9	6.6	12.97	4	0	1.137	0.963974	93.5	86.7	113.3	17.25	39.49	79099.1	168052	82194.4	79302.5	1
1110	P40504	Probable mannosyltransferase KTR7	High	High	High	High	High	0	5.18	3	2	6	2	517	61.4	5.33	11.55	2	0	1.201	0.965426	34.67	120.3	79.7	11.34	3.38	159889	226367	93745.7	48584.8	1
1330	P42941	Phosphoserine phosphatase	High	High	High	High	High	0	7.509	12	3	7	3	309	34.2	5.21	14.04	3	0	1.201	0.965426	35.8	107.4	92.6	11.77	27.06	153262	215648	93848.7	75167.4	1
996	Q12028	AP-1 complex subunit gamma-1	Peak Found	High	Peak Found	Peak Found	Medium	0.013	2.231	1	1	1	1	832	93.6	5.45	2.03	1	0	1.711	0.965785	52.58	126.2	73.8	52.08	15.57	8986.69	32357.3	8082.68	3522.68	1
1283	P53145	Large subunit GTPase 1	High	High	High	High	High	0	7.968	8	4	6	4	640	72.7	8.76	5.66	4	0	1.197	0.965785	62.05	109.8	90.2	22.48	15.97	109871	251722	88633.7	60453.1	1
271	Q12466	Tricalbin-1	High	High	Peak Found	Peak Found	High	0	25.64	9	8	12	7	1186	133.5	7.15	23.72	8	1	1.238	0.966257	42.83	187.5	12.5	21.95	40.61	494576	1.12432e+06	26921.4	26425.4	1
853	P33302	Pleiotropic ABC efflux transporter of multiple drugs	High	High	High	High	High	0	22.677	5	6	17	6	1511	170.3	7.81	31.95	6	0	1.693	0.966684	38.57	133.5	66.5	22.69	2.99	663693	1.52516e+06	356316	202065	1
306	P40548	HSP70 co-chaperone SNL1	High	High	Not Found	Peak Found	High	0	14.499	16	2	5	2	159	18.3	9.57	16.76	2	0	1.675	0.968687	3.97	179.1	20.9	19.01		285074	361608		14754.4	1
1047	Q07979	Chromatin structure-remodeling complex protein RSC58	Peak Found	High	Peak Found	Peak Found	High	0.007	2.407	2	1	1	1	502	57.8	8.16	1.89	1	0	1.625	0.968687	12.5	123.8	76.2	1.51	12.01	29797.8	50608.4	18897.8	8664.97	1
1403	P32597	Nuclear protein STH1/NPS1	High	High	High	High	High	0	11.601	4	4	10	4	1359	156.6	6.71	17.68	4	0	1.21	0.968687	22.92	101.1	98.9	2.52	28.85	166405	286707	126202	103774	1
1148	P33328	Synaptobrevin homolog 2	High	High	High	High	High	0	12.844	27	4	8	3	115	12.9	8.76	19.42	4	1	1.279	0.969375	65.25	118	82	1.74	45.62	480149	818188	226434	240316	1
1244	P53858	Protein BNI4	Peak Found	High	Peak Found	Peak Found	Medium	0.026	1.913	1	1	1	1	892	100.5	5.06	2.34	1	0	1.271	0.969375	61.62	111.9	88.1	9.7	57.51	1.41537e+06	2.69948e+06	725404	934979	1
1272	P42842	Essential for maintenance of the cell wall protein 1	High	High	High	High	High	0	17.637	8	6	11	6	904	102.3	5.64	23.64	6	0	1.623	0.969375	86.03	110.3	89.7	24.77	15.68	270165	639923	219605	149170	1
1348	P47031	Inclusion body clearance protein IML2	Peak Found	High	Not Found	Peak Found	High	0	5.26	3	2	2	2	731	82.5	6.64	4.59	2	0	1.113	0.969375	22.45	105.4	94.6	21.18		44483.3	54691.7		17488.6	1
1352	P43603	LAS seventeen-binding protein 3	High	Peak Found	High	High	High	0.01	2.33	3	1	4	1	459	49.3	7.96	3.77	1	0	1.109	0.969375	35.69	105.2	94.8	35.39	41.98	55934.7	55765.3	26934.9	27006.4	1
1285	P43582	WW domain-containing protein WWM1	Peak Found	High	High	High	High	0.001	3.264	8	1	3	1	211	22.6	4.53	2.52	1	0	1.213	0.970711	25.93	109.6	90.4	2.41	24.77	146960	236151	133090	50787.9	1
260	P80967	Mitochondrial import receptor subunit TOM5	High	High	Peak Found	Peak Found	High	0	7.001	30	1	6	1	50	6	8.54	15.24	1	0	1.568	0.973485	15.71	192.5	7.5	6.25	12.05	913988	1.66004e+06	38059.1	17440.3	1
327	Q08227	Phosphatidylinositol 4,5-bisphosphate 5-phosphatase INP54	High	High	High	Not Found	High	0	6.661	9	2	4	2	384	43.8	7.64	11.23	2	0	1.554	0.973485	4.89	174.1	25.9	1.01		68843.5	116095	9676.31		1
328	P0CX50	60S ribosomal protein L18-B	High	High	High	High	High	0	24.852	26	6	74	6	186	20.6	11.71	175.82	6	0	1.322	0.973485	64.67	173.6	26.4	1.37	7.65	2.02414e+07	3.30062e+07	3.01756e+06	1.47209e+06	1
330	P48813	High-affinity glutamine permease	Peak Found	High	Peak Found	Peak Found	High	0	7.969	6	3	4	3	663	73.6	7.74	6.31	3	0	1.598	0.973485	74.28	173.2	26.8	14.3	55.33	189196	385314	20073.4	24938	1
360	P23292	Casein kinase I homolog 2	High	High	High	Not Found	High	0	22.114	17	5	15	4	546	62	9.07	35.91	5	0	1.553	0.973485	8.4	168.7	31.3	9.44		426467	810466	79179.3		1
433	P38811	Transcription-associated protein 1	Peak Found	High	Peak Found	Peak Found	High	0.001	3.515	1	2	2	2	3744	432.9	6.55	1.94	2	0	1.539	0.973485	101.25	161	39	15.66	87.55	39296.2	81604.1	4826.3	11152	1
448	P53040	Transcription initiation factor TFIID subunit 6	High	High	High	Peak Found	High	0	11.318	8	4	6	4	516	57.9	5.43	9.04	4	0	1.572	0.973485	22.21	160	40	5.54	21.29	171301	308005	48567.8	19494.7	1
453	P53261	Pescadillo homolog	High	High	High	High	High	0	33.469	18	9	18	9	605	69.8	5.6	41.1	9	0	1.613	0.973485	97.36	159.7	40.3	8.33	33.49	906282	1.69525e+06	178463	157237	1
469	P40327	26S proteasome regulatory subunit 4 homolog	High	High	High	High	High	0	24.662	19	7	13	7	437	48.8	6.04	34.71	7	0	1.308	0.973485	13.86	158.7	41.3	25.95	44.3	1.05596e+06	2.54456e+06	224197	233058	1
476	P53969	Sorting assembly machinery 50 kDa subunit	High	High	Peak Found	High	High	0	8.76	8	3	7	3	484	54.4	8.51	12.28	3	0	1.539	0.973485	14.56	158.3	41.7	17.3	5.51	208776	443875	55991	32908.5	1
480	P38009	Bifunctional purine biosynthesis protein ADE17	High	High	High	Peak Found	High	0	17.342	16	7	9	7	592	65.2	6.55	17.9	7	0	1.555	0.973485	40.85	158	42	1.68	50.33	276420	470581	47930.6	54852	1
483	P54783	D-arabinono-1,4-lactone oxidase	High	High	High	High	High	0	43.141	27	13	26	13	526	59.5	6.8	64.79	13	0	1.368	0.973485	58.14	157.9	42.1	19.38	39.71	1.42183e+06	3.11481e+06	305357	295605	1
522	P29469	DNA replication licensing factor MCM2	High	High	High	Peak Found	High	0	16.346	7	5	7	5	868	98.7	5.15	18.51	5	0	1.617	0.973485	23.04	154.5	45.5	0.01	1.02	186900	310764	51116.3	28194.1	1
545	P49334	Mitochondrial import receptor subunit TOM22	High	High	High	High	High	0	16.38	20	2	18	2	152	16.8	4.16	48.95	2	0	1.639	0.973485	45.58	152.5	47.5	6.37	97.12	1.31924e+06	2.00409e+06	853660	86177.2	1
559	P38754	60S ribosomal protein L14-B	High	High	High	High	High	0	46.174	54	9	75	9	138	15.1	10.93	174.65	9	0	1.342	0.973485	70.88	152.1	47.9	6.86	55.35	2.37679e+07	3.58566e+07	4.41414e+06	5.48578e+06	1
561	P40009	Golgi apyrase	High	High	Peak Found	Peak Found	High	0	18.029	13	6	8	6	630	71.8	6.24	17.04	6	0	1.552	0.973485	57.29	152	48	18.94	32.34	198760	432661	53265.1	46128.7	1
581	P38061	60S ribosomal protein L32	High	High	High	High	High	0	20.912	36	5	30	5	130	14.8	11.17	51.33	5	0	1.293	0.973485	94.09	150.2	49.8	12.83	49.33	1.36604e+07	1.89318e+07	2.69085e+06	3.0298e+06	1
592	P00815	Histidine biosynthesis trifunctional protein	High	High	High	Peak Found	High	0	25.116	10	6	11	6	799	87.7	5.29	26.77	6	0	1.609	0.973485	58.2	149.2	50.8	17.37	4.57	233637	497187	87143.5	44409.7	1
595	P05759	Ubiquitin-40S ribosomal protein S31	High	High	High	High	High	0	33.914	37	6	38	3	152	17.2	9.86	92.16	6	3	1.348	0.973485	67.84	149	51	22.17	40.88	1.3047e+07	1.5813e+07	2.64788e+06	2.60996e+06	1
598	Q03529	Ceramide very long chain fatty acid hydroxylase SCS7	High	High	High	High	High	0	30.88	18	6	20	6	384	44.9	6.55	43.61	6	0	1.303	0.973485	29.64	148.6	51.4	0.57	68.96	2.74453e+06	4.52654e+06	1.50745e+06	282276	1
603	Q08548	Lysophospholipid acyltransferase	High	High	High	High	High	0	23.702	9	6	19	6	619	72.2	9.48	44	6	0	1.32	0.973485	77.26	148.2	51.8	12.63	16.57	1.30975e+06	2.60462e+06	416976	286862	1
607	P07253	Cytochrome B pre-mRNA-processing protein 6	Peak Found	High	Peak Found	High	High	0	8.42	20	3	5	3	162	18.7	9.89	10.54	3	0	1.597	0.973485	106.49	147.9	52.1	28.32	53.06	186141	464436	50736.9	60708.2	1
612	Q05779	Ubiquinone biosynthesis protein COQ9, mitochondrial	Peak Found	High	Peak Found	Peak Found	High	0	4.088	8	2	2	2	260	29.9	8.79	4.12	2	0	1.455	0.973485	49.16	147	53	5.91	44.7	78202.2	141351	19847.7	20762.5	1
619	P21576	Vacuolar protein sorting-associated protein 1	High	High	High	High	High	0	46.059	23	13	35	13	704	78.7	7.91	75.77	13	0	1.33	0.973485	58.58	146.6	53.4	5.86	5.32	2.50395e+06	3.83168e+06	789184	462582	1
625	P32487	Lysine-specific permease	High	High	Peak Found	Peak Found	High	0	8.326	6	2	4	2	611	68	6.99	13.37	2	0	1.556	0.973485	31.87	146.4	53.6	23.28	37.57	102392	237330	31593.1	29599.9	1
643	Q12019	Midasin	High	High	High	High	High	0	58.893	4	17	36	17	4910	559	5.01	81.47	17	0	1.618	0.973485	86.03	144.7	55.3	6.27	43.98	831876	1.51125e+06	225669	233417	1
684	P38736	Golgi SNAP receptor complex member 1	High	High	High	High	High	0	22.136	43	7	18	7	223	25.4	9.44	36.46	7	0	1.587	0.973485	99.71	142.4	57.6	7.71	52.7	650291	1.20576e+06	175982	209329	1
686	P38921	Putative mitochondrial carrier protein PET8	High	High	Not Found	Peak Found	High	0	9.83	10	2	3	2	284	31	9.64	8.9	2	0	1.157	0.973485	2.61	142.2	57.8	24.46		73907.7	86640.6		12841.8	1
689	P42945	U3 small nucleolar RNA-associated protein 10	High	High	High	High	High	0	25.506	6	9	13	9	1769	200	6.49	26.14	9	0	1.313	0.973485	82.71	142	58	12.76	66.21	517648	1.03127e+06	130396	195712	1
716	P0CX53	60S ribosomal protein L12-A	High	High	High	High	High	0	75.837	64	11	176	11	165	17.8	9.41	504.71	11	0	1.631	0.973485	64.87	141.2	58.8	6	45.93	5.08976e+07	9.21192e+07	1.47903e+07	1.57748e+07	1
718	P07991	Ornithine aminotransferase	High	High	Peak Found	High	High	0	12.846	11	4	6	4	424	46.1	6.95	13.09	4	0	1.239	0.973485	39.7	141	59	2.15	52.83	265740	428561	69245.5	82545.8	1
739	P38929	Calcium-transporting ATPase 2	High	High	High	Peak Found	High	0	8.548	3	4	4	4	1173	130.8	7.39	4.06	4	0	1.323	0.973485	83.99	139.7	60.3	7.91	46.31	160153	238058	43585	46770.5	1
755	P15424	ATP-dependent RNA helicase MSS116, mitochondrial	High	High	High	Peak Found	High	0	23.365	11	7	15	7	664	76.2	8.98	27.49	7	0	1.607	0.973485	41.35	138.8	61.2	16.57	16.29	338089	444180	110475	75695.7	1
759	P32875	Lipoyl synthase, mitochondrial	High	High	High	High	High	0	8.836	7	3	6	3	414	46.2	9.5	13.01	3	0	1.513	0.973485	52.73	138.6	61.4	4.57	30.43	111554	197862	38411.1	32331.5	1
760	P53273	Uncharacterized vacuolar membrane protein YGR125W	High	High	High	High	High	0	20.712	7	7	11	7	1036	116.9	7.37	19.53	7	0	1.249	0.973485	75.24	138.6	61.4	1.89	46.75	313363	535115	93377.4	100891	1
764	P40309	K(+)/H(+) antiporter 1	High	High	Peak Found	Peak Found	High	0	5.175	2	2	3	2	873	97	6.09	5.95	2	0	1.551	0.973485	12.39	138.5	61.5	11.15	3.11	43030.3	83786.4	18952	10766.1	1
769	P31373	Cystathionine gamma-lyase	High	High	High	High	High	0	13.034	10	3	11	3	394	42.5	6.54	28.51	3	0	1.264	0.973485	87.47	138.4	61.6	8.36	72.91	256631	379026	178412	31003.1	1
771	P38297	Mitofusin FZO1	Peak Found	High	Peak Found	Peak Found	High	0	3.959	3	2	2	2	855	97.7	7.01	0	2	0	1.501	0.973485	65.72	138.2	61.8	23.01	22.4	30510.1	70436.7	12845	9611.27	1
774	P39729	Ribosome-interacting GTPase 1	High	High	High	High	High	0	17.528	18	5	15	5	369	40.7	8.34	32.79	5	0	1.327	0.973485	46.28	138.1	61.9	9.07	0.43	521947	763203	204996	112127	1
778	P04046	Amidophosphoribosyltransferase	High	High	High	Peak Found	High	0	20.727	15	6	15	6	510	56.7	6.28	29.37	6	0	1.584	0.973485	82.35	138	62	1.12	0.91	505653	827425	212489	114034	1
780	P13188	Glutamine--tRNA ligase	High	High	Not Found	Peak Found	High	0	6.291	3	2	3	2	809	93.1	8.41	6.02	2	0	1.191	0.973485	15.18	137.9	62.1	7.24		103379	155131		22499.2	1
811	P33311	ATP-dependent permease MDL2, mitochondrial	High	High	High	Not Found	High	0	6.246	3	2	4	2	773	85.1	9.07	6.86	2	0	1.559	0.973485	2.05	136.4	63.6	0.99		85883.9	140800	37249.3		1
818	P39076	T-complex protein 1 subunit beta	High	High	High	High	High	0	37.343	26	11	24	11	527	57.2	6.11	47.18	11	0	1.584	0.973485	67.94	136.1	63.9	1.84	30.96	1.34648e+06	2.18108e+06	467189	396367	1
820	P38342	3-ketodihydrosphingosine reductase TSC10	High	High	Peak Found	High	High	0	13.266	18	4	7	4	320	35.9	6.32	15.53	4	0	1.583	0.973485	55.66	135.9	64.1	7.02	43.21	472895	868317	159979	163501	1
821	P32784	Glycerol-3-phosphate O-acyltransferase 1	High	High	High	Peak Found	High	0	13.995	6	4	8	4	759	85.6	7.28	19.21	4	0	1.283	0.973485	16.68	135.7	64.3	33.52	13.52	227568	613420	116823	76933.9	1
823	P46655	Glutamate--tRNA ligase, cytoplasmic	High	High	High	High	High	0	58.05	21	14	30	14	708	80.8	7.53	68.43	14	0	1.284	0.973485	61.46	135.5	64.5	1.95	29.25	1.48525e+06	2.53822e+06	544447	450347	1
854	P07703	DNA-directed RNA polymerases I and III subunit RPAC1	High	High	High	High	High	0	25.034	22	7	18	7	335	37.7	5.52	41.02	7	0	1.582	0.973485	69.54	133.4	66.6	4.11	28.96	814531	1.27775e+06	300720	247687	1
858	P53312	Succinate--CoA ligase	High	High	High	Peak Found	High	0	9.053	10	3	6	3	427	46.9	7.47	13.45	3	0	1.577	0.973485	40.42	133.3	66.7	8.37	8.17	122431	180787	51045.5	31153	1
862	P53252	Sphingolipid long chain base-responsive protein PIL1	High	High	High	High	High	0	46.815	41	12	55	11	339	38.3	4.63	125.57	12	1	1.361	0.973485	103.93	133.2	66.8	7.89	14.76	3.18434e+06	4.73442e+06	1.27327e+06	853462	1
873	P06786	DNA topoisomerase 2	High	High	Peak Found	Peak Found	High	0	5.774	1	2	3	2	1428	164.1	7.03	7.21	2	0	1.494	0.973485	6.15	132.6	67.4	2.97	50.38	73718.8	127810	24670.9	28254.2	1
897	P00549	Pyruvate kinase 1	High	High	High	High	High	0	223.817	73	39	382	37	500	54.5	7.68	998.45	39	2	1.616	0.973485	97.55	131.3	68.7	5.45	23.39	1.72536e+08	3.0985e+08	7.43315e+07	5.64239e+07	1
901	Q12122	Homocitrate synthase, mitochondrial	High	High	High	High	High	0	6.992	5	2	5	2	440	48.6	6.3	11.89	2	0	1.214	0.973485	34.22	131	69	9.91	34.58	91047	131538	32592.9	29189.6	1
909	P31688	Trehalose-phosphatase	High	High	High	High	High	0	25.732	12	9	21	9	896	102.9	8.15	43.02	9	0	1.609	0.973485	66.78	130.7	69.3	44.43	10.1	584906	1.86326e+06	374451	234867	1
928	P40850	Post-transcriptional regulator MKT1	High	High	Peak Found	Peak Found	High	0	5.626	3	2	3	2	830	94.4	5.62	4.68	2	0	1.534	0.973485	39.5	129.6	70.4	14.22	48.11	70880.5	144178	27996.4	30913.6	1
931	Q04935	Cytochrome c oxidase assembly protein COX20, mitochondrial	Peak Found	High	Peak Found	Peak Found	High	0	4.953	9	2	2	2	205	23.7	9.44	4.72	2	0	1.494	0.973485	39.2	129.4	70.6	63.12	46.55	41297.3	179363	24240.4	26108.3	1
933	P36080	Ribosomal RNA-processing protein 14	High	High	High	High	High	0	7.933	8	3	6	3	434	50.5	9.57	9.98	3	0	1.253	0.973485	26.64	129.3	70.7	8.72	23.29	145205	273131	93452.2	36434.6	1
934	P0CX40	40S ribosomal protein S8-B	High	High	High	High	High	0	46.528	46	8	76	8	200	22.5	10.67	186.88	8	0	1.573	0.973485	91.02	129.2	70.8	39.24	14.48	1.28751e+07	1.21076e+07	4.48494e+06	2.99425e+06	1
943	P09436	Isoleucine--tRNA ligase, cytoplasmic	High	High	High	High	High	0	45.928	18	15	25	15	1072	122.9	6.06	49	15	0	1.57	0.973485	98.09	128.6	71.4	8.51	11.12	1.41296e+06	2.65002e+06	720781	458736	1
950	Q03798	Altered inheritance of mitochondria protein 36, mitochondrial	High	High	Peak Found	Not Found	High	0	8.787	14	3	5	3	255	29.1	9.32	9.15	3	0	1.234	0.973485	0	128.4	71.6	45.86		58109.7	189329	42507.3		1
960	P60010	Actin	High	High	High	High	High	0	40.874	35	9	35	9	375	41.7	5.68	87.58	9	0	1.616	0.973485	101.77	127.9	72.1	1.79	6.63	2.28747e+06	3.70803e+06	1.1386e+06	679905	1
987	P36008	Elongation factor 1-gamma 2	High	High	High	Peak Found	High	0	22.455	15	6	18	6	412	46.5	7.87	39.38	6	0	1.32	0.973485	69.45	126.6	73.4	8.55	29.14	3.07204e+06	4.5252e+06	1.27279e+06	1.05114e+06	1
990	P07256	Cytochrome b-c1 complex subunit 1, mitochondrial	High	High	High	High	High	0	27.285	16	7	27	7	457	50.2	7.3	58.25	7	0	1.299	0.973485	96.96	126.5	73.5	16.65	30.09	1.81829e+06	3.82989e+06	897297	751434	1
991	P39517	ATP-dependent RNA helicase DHH1	High	High	High	High	High	0	10.13	6	3	12	3	506	57.5	7.97	22.34	3	0	1.624	0.973485	44.54	126.4	73.6	12.58	34.64	491285	976240	227959	204323	1
992	Q03516	Uncharacterized protein RSN1	High	High	High	Peak Found	High	0	9.128	4	3	5	3	953	107.6	8.65	12.88	3	0	1.582	0.973485	55.06	126.4	73.6	3.61	24.89	265703	464882	124373	96495.2	1
1002	Q05359	Protein ERP1	High	High	High	High	High	0	23.317	28	5	25	5	219	24.7	7.43	60.2	5	0	1.292	0.973485	65.32	125.8	74.2	7.94	39.68	2.56963e+06	4.78046e+06	1.12472e+06	1.08838e+06	1
1006	P02557	Tubulin beta chain	High	High	High	High	High	0	26.492	18	7	30	7	457	50.9	4.75	75.93	7	0	1.659	0.973485	82.36	125.6	74.4	14.28	16.19	2.29218e+06	4.66683e+06	1.57838e+06	681814	1
1007	P21264	Phosphoribosylaminoimidazole carboxylase	High	High	Peak Found	Not Found	High	0	9.863	7	3	4	3	571	62.3	7.33	9.27	3	0	1.125	0.973485	0	125.6	74.4	43.35		37291.9	116801	28386.8		1
1009	P40010	Nuclear GTP-binding protein NUG1	High	High	High	High	High	0	30.884	22	9	24	9	520	57.7	8.88	51.31	9	0	1.362	0.973485	78.22	125.5	74.5	0.51	23.87	1.64102e+06	2.70877e+06	766671	586074	1
1012	P14772	Bile pigment transporter 1	High	High	High	High	High	0	20.172	6	7	11	7	1559	176.8	7.65	18.43	7	0	1.239	0.973485	52.24	125.3	74.7	6.96	44.55	192879	353847	81552.8	85108.7	1
1016	P04456	60S ribosomal protein L25	High	High	High	High	High	0	28.648	31	4	57	4	142	15.7	10.11	137.82	4	0	1.348	0.973485	78.88	125.1	74.9	26.1	16.62	2.25428e+07	2.58001e+07	9.31647e+06	6.41382e+06	1
1024	P33767	Dolichyl-diphosphooligosaccharide--protein glycosyltransferase subunit WBP1	High	High	High	High	High	0	28.384	19	8	20	8	430	49.4	5.9	43.08	8	0	1.361	0.973485	90.14	124.9	75.1	11.85	56.55	1.15715e+06	1.62625e+06	915118	213284	1
1035	P53733	37S ribosomal protein S19, mitochondrial	High	High	High	Peak Found	High	0.001	3.53	9	1	12	1	91	10.3	10.54	25.85	1	0	1.642	0.973485	46.3	124.3	75.7	19.97	47.9	6.09607e+06	1.34687e+07	2.81707e+06	3.10045e+06	1
1036	P53925	Uncharacterized vacuolar membrane protein YNL115C	High	High	High	Peak Found	High	0	9.17	10	4	5	4	644	74	6.62	6.51	4	0	1.222	0.973485	61.85	124.3	75.7	16.78	47.71	181591	237846	64752.3	71049.5	1
1041	P39742	Translocation protein SEC72	Peak Found	High	High	High	High	0.001	3.074	5	1	3	1	193	21.6	5.68	4.36	1	0	1.64	0.973485	14.84	124.2	75.8	14.29	2.08	107583	146033	56333.2	29734.9	1
1042	Q12434	Rho GDP-dissociation inhibitor	High	High	Peak Found	Peak Found	Medium	0.035	1.759	6	1	2	1	202	23.1	6.04	0	1	0	1.639	0.973485	44.83	124.2	75.8	57.04	50.9	16023.4	62655.8	9633.33	11126.7	1
1048	P53927	Ribosome biogenesis protein 15	High	High	Peak Found	Peak Found	High	0.004	2.748	4	1	2	1	220	25.4	9.28	1.83	1	0	1.625	0.973485	61.11	123.8	76.2	11.42	57.7	97466.7	190518	93922.7	21467.2	1
1049	P40991	25S rRNA (cytosine(2870)-C(5))-methyltransferase	High	High	High	High	High	0	25.447	15	8	18	8	618	69.8	5.05	41.95	8	0	1.603	0.973485	63.84	123.8	76.2	7.46	21.7	984960	1.81999e+06	512995	379997	1
1050	P19358	S-adenosylmethionine synthase 2	High	High	High	High	High	0	46.141	37	12	46	6	384	42.2	5.38	113.98	12	6	1.302	0.973485	83.09	123.8	76.2	28.54	32.77	5.28172e+06	1.32204e+07	2.95127e+06	2.57238e+06	1
1058	P38707	Asparagine--tRNA ligase, cytoplasmic	High	High	High	High	High	0	24.659	15	6	13	6	554	62.2	5.85	24.97	6	0	1.648	0.973485	39.73	123.4	76.6	32.45	12.31	388339	1.03013e+06	261158	169041	1
1059	Q99248	Uncharacterized protein YOR019W	Peak Found	High	Peak Found	Peak Found	Medium	0.031	1.835	1	1	1	1	730	83.3	9.73	1.64	1	0	1.612	0.973485	48.04	123.4	76.6	3.82	44.67	21092	37013.2	9073.44	9487.01	1
1066	Q07657	Seventh homolog of septin 1	High	High	Peak Found	Not Found	High	0.004	2.91	2	1	2	1	551	62.6	5.53	1.74	1	0	1.598	0.973485	18.1	123	77	17.14		14310.9	30355.2	9469.47		1
1067	P04147	Polyadenylate-binding protein, cytoplasmic and nuclear	High	High	High	High	High	0	76.318	37	16	57	16	577	64.3	5.97	126.39	16	0	1.338	0.973485	72.39	123	77	13.76	25.12	3.70423e+06	5.06607e+06	1.64379e+06	1.27973e+06	1
1071	P25343	Reduced viability upon starvation protein 161	High	High	High	High	High	0	17.289	16	4	13	4	265	30.2	6.62	25.88	4	0	1.573	0.973485	51.72	122.8	77.2	8.01	23.86	368594	547142	172944	132185	1
1073	Q3E834	Protein transport protein YOS1	High	High	High	High	High	0	9.021	34	2	5	2	85	9.4	9.52	7.02	2	0	1.636	0.973485	59.31	122.7	77.3	23.23	56.79	248460	296516	81175.4	103349	1
1074	P32660	Phospholipid-transporting ATPase DNF1	High	High	High	High	High	0	28.446	8	10	19	7	1571	177.7	6.04	38.6	10	0	1.304	0.973485	63.14	122.7	77.3	1.13	46.56	864758	1.415e+06	359380	387137	1
1075	P38720	6-phosphogluconate dehydrogenase, decarboxylating 1	High	High	High	High	High	0	35.623	25	9	24	9	489	53.5	6.64	59.43	9	0	1.364	0.973485	48.58	122.6	77.4	12.98	7.32	1.03772e+06	2.07396e+06	707586	346827	1
1080	P47077	Nucleolar protein 9	High	High	High	Peak Found	High	0	6.1	4	2	4	2	666	77.7	8.15	6.85	2	0	1.213	0.973485	36.41	122.4	77.6	6.44	47.2	90311.9	137072	36169	39362.8	1
1084	P53686	NAD-dependent protein deacetylase HST2	High	Peak Found	Peak Found	Peak Found	Medium	0.011	2.289	3	1	1	1	357	40	5.81	1.88	1	0	1.561	0.973485	47.91	121.9	78.1	2.89	44.3	58622.1	93557.2	24904.3	25889.5	1
1086	P06775	Histidine permease	High	High	Peak Found	Peak Found	High	0	6.525	3	1	2	1	603	66	7.4	5.44	1	0	1.557	0.973485	42.79	121.8	78.2	54.74	56.32	33181.3	24374.9	8699.59	10989.6	1
1088	Q08421	Enhancer of translation termination 1	Peak Found	Peak Found	High	Not Found	High	0.006	2.62	3	1	1	1	412	47.3	4.79	2.04	1	0	1.555	0.973485	74.5	121.7	78.3	63.5		65510.8	41417.9	24330		1
1091	P36149	Trafficking protein particle complex subunit BET3	Peak Found	High	Peak Found	Peak Found	High	0.006	2.502	4	1	2	1	193	22.1	5.06	4.13	1	0	1.55	0.973485	29.8	121.6	78.4	30.76	34.4	28776.1	74437	27786.6	9195.28	1
1094	P32598	Serine/threonine-protein phosphatase PP1-2	High	High	High	High	High	0	17.806	21	5	15	5	312	35.9	5.49	29.95	5	0	1.291	0.973485	95.84	121.3	78.7	10.37	1	310030	596981	204230	109474	1
1096	P00498	ATP phosphoribosyltransferase	High	High	High	High	High	0	15.768	18	5	14	5	297	32.2	6.15	27.85	5	0	1.578	0.973485	47.89	121.2	78.8	8.82	29.8	799018	1.5052e+06	417740	348374	1	Acetyl [N-Term]
1098	Q12402	Protein YOP1	High	High	High	High	High	0	6.478	9	2	8	2	180	20.3	9.03	17.75	2	0	1.57	0.973485	64.81	121.1	78.9	1.99	62.37	5.96019e+06	1.01916e+07	2.29884e+06	3.22174e+06	1
1099	P38833	Uncharacterized protein YHR127W	High	High	Peak Found	Peak Found	High	0	4.567	9	2	3	2	243	27.1	10.48	5.8	2	0	1.556	0.973485	41.5	121.1	78.9	11.58	3.37	123088	173650	67550	38514.5	1
1100	P30822	Exportin-1	Peak Found	High	Peak Found	Peak Found	High	0.001	3.24	1	1	1	1	1084	124	5.48	3.01	1	0	1.533	0.973485	50.54	121.1	78.9	8.03	48	75917.4	141406	69863.7	18731.3	1
1104	P39535	Low-affinity phosphate transporter PHO90	Peak Found	High	Peak Found	Peak Found	High	0.01	2.35	1	1	1	1	881	97.6	7.09	2.58	1	0	1.524	0.973485	61.22	120.8	79.2	25.28	62.71	21657.5	51678.6	25663.5	5380.08	1
1105	P03872	Partitioning protein REP2	Peak Found	High	High	Not Found	High	0	5.538	5	1	2	1	296	33.2	9.01	5.5	1	0	1.523	0.973485	34.44	120.7	79.3	32		29504.3	77737.8	22838		1
1107	P34226	Chitin synthase regulator SKT5	Peak Found	High	Peak Found	Not Found	Medium	0.014	2.182	1	1	1	1	696	77	9.28	2.05	1	0	1.52	0.973485	31.7	120.6	79.4	29.57		52258.2	56831.1	26031.6		1
1109	P49723	Ribonucleoside-diphosphate reductase small chain 2	High	High	Peak Found	Peak Found	High	0.004	2.787	3	1	2	1	345	40	5.21	3.8	1	0	1.513	0.973485	43.83	120.4	79.6	9.45	42.62	73242.7	106508	31051.3	31444.9	1
1115	P40457	Protein MLP2	High	Peak Found	Peak Found	Peak Found	High	0.006	2.502	1	1	1	1	1679	195	5.97	1.97	1	0	1.498	0.973485	25.17	119.9	80.1	25.14	8.8	29133.3	69383	23192.2	11130.4	1
1116	P00942	Triosephosphate isomerase	High	High	High	High	High	0	33.021	27	6	18	6	248	26.8	6.01	44.84	6	0	1.34	0.973485	60.81	119.8	80.2	7.83	30.01	869667	1.61527e+06	464893	388886	1
1119	P32319	Vacuolar protein sorting/targeting protein VPS10	High	High	High	High	High	0	64.151	14	18	40	15	1579	177.7	4.89	94.09	18	3	1.324	0.973485	87.77	119.6	80.4	17.99	3.86	1.4984e+06	1.92893e+06	852450	438766	1
1123	P42840	Uncharacterized membrane protein YNL320W	Peak Found	High	Peak Found	Peak Found	Medium	0.014	2.182	2	1	1	1	284	32.3	7.75	0	1	0	1.481	0.973485	52.45	119.4	80.6	31.99	57.53	40503.3	106705	20934	26990.3	1
1126	Q03246	37S ribosomal protein S17, mitochondrial	High	High	Peak Found	Not Found	High	0.003	2.945	5	1	2	1	237	27.6	9.58	5.08	1	0	1.479	0.973485	35.88	119.3	80.7	33.26		47267	48655.2	23546.9		1
1127	Q05543	Regulator of Ty1 transposition protein 103	High	High	High	High	High	0	8.588	8	2	4	2	409	46.5	4.93	10.32	2	0	1.203	0.973485	58.66	119.3	80.7	3.31	20.78	75594.1	119927	40370.5	29505.5	1
1131	Q06543	GPN-loop GTPase 3	High	Peak Found	Peak Found	Not Found	High	0.001	3.133	5	1	1	1	272	30.6	4.53	2.31	1	0	1.469	0.973485	30.03	119	81	28.08		36973.6	91926.1	28821.4		1
1134	P24783	ATP-dependent RNA helicase DBP2	High	High	High	High	High	0	72.178	44	20	66	19	546	61	8.78	144.36	20	2	1.291	0.973485	79.23	118.8	81.2	19.46	23.31	4.56949e+06	5.75885e+06	2.15769e+06	1.63597e+06	1
1137	Q06505	Transcription factor SPN1	High	High	High	Not Found	High	0	12.647	11	3	6	3	410	46.1	7.52	10.31	3	0	1.578	0.973485	26.13	118.6	81.4	11.16		98432.6	191677	68394.9		1
1141	P32263	Pyrroline-5-carboxylate reductase	High	High	High	High	High	0	16.23	14	4	17	4	286	30.1	5.48	37.7	4	0	1.308	0.973485	54.72	118.4	81.6	2.5	42.03	1.40512e+06	2.42024e+06	678953	681280	1
1152	P47082	Vacuolar amino acid transporter 1	High	High	Peak Found	High	High	0	7.201	7	3	4	3	602	65.3	8.12	6.06	3	0	1.621	0.973485	70.8	117.5	82.5	44.36	57.05	234915	747579	139209	178025	1
1155	P38817	ADP-ribosylation factor-binding protein GGA2	High	High	High	Peak Found	High	0	16.048	12	5	8	5	585	64.3	6.49	19.86	5	0	1.288	0.973485	59.54	117.4	82.6	56.54	25.28	686853	489627	247183	192866	1
1158	P21524	Ribonucleoside-diphosphate reductase large chain 1	High	High	High	High	High	0	45.183	16	13	41	13	888	99.5	6.19	88.13	13	0	1.315	0.973485	83.73	117	83	8.96	23.54	1.94088e+06	2.84225e+06	1.02271e+06	778055	1
1159	P33734	Imidazole glycerol phosphate synthase hisHF	High	High	High	Not Found	High	0	6.015	4	2	4	2	552	61	5.49	9.66	2	0	1.212	0.973485	0	117	83	59.69		22936.3	93831.9	23904		1
1163	P23615	Transcription elongation factor SPT6	High	High	Peak Found	Peak Found	High	0	9.626	2	3	5	3	1451	168.2	5.01	9.53	3	0	1.537	0.973485	53.16	116.7	83.3	32.77	50.76	80814.5	215406	46958.8	54116.1	1
1166	P36081	PMA1 stabilization in the Golgi protein 1	High	High	High	Peak Found	High	0	12.716	10	4	11	4	392	46	8.91	20.4	4	0	1.577	0.973485	119.72	116.5	83.5	7.41	18.45	661166	1.22083e+06	410470	290107	1
1167	P08566	Pentafunctional AROM polypeptide	High	High	High	High	High	0	40.164	12	14	27	14	1588	174.6	6.28	45.59	14	0	1.349	0.973485	67.02	116.5	83.5	4.71	48.65	1.15231e+06	2.0479e+06	558191	621687	1
1175	P21965	Protein kinase MCK1	High	High	High	High	High	0	8.36	8	3	8	3	375	43.1	8.65	17.48	3	0	1.32	0.973485	72.5	116.1	83.9	28.98	47.81	444029	487151	171635	188615	1
1191	Q04217	Probable ATP-dependent RNA helicase DHR1	High	Peak Found	Peak Found	Peak Found	Medium	0.023	2.006	1	1	1	1	1267	144.9	6.34	2.27	1	0	1.361	0.973485	45.26	115.3	84.7	20.41	47.08	4.47143e+06	5.55859e+06	1.88236e+06	2.04455e+06	1
1194	P32331	Mitochondrial glycine transporter YMC1	High	High	Peak Found	Peak Found	High	0	10.428	13	3	5	3	307	33.4	9.38	10.53	3	0	1.304	0.973485	48.26	115	85	16.75	49.01	2.92163e+06	6.16209e+06	1.58698e+06	1.77785e+06	1
1200	P05626	ATP synthase subunit 4, mitochondrial	High	High	Peak Found	High	High	0	20.662	27	6	13	6	244	26.9	9.13	31.98	6	0	1.567	0.973485	82.04	114.4	85.6	3.36	24.27	863105	1.50476e+06	520200	399963	1
1205	P0CX46	60S ribosomal protein L2-B	High	High	High	High	High	0	63.084	35	10	104	10	254	27.4	11.11	281.14	10	0	1.655	0.973485	107.88	114.2	85.8	18.38	49.34	1.99454e+07	2.55335e+07	8.55325e+06	9.63227e+06	1
1206	P04650	60S ribosomal protein L39	High	High	High	Peak Found	High	0	4.91	20	1	5	1	51	6.3	12.56	13.05	1	0	1.33	0.973485	65.67	114.2	85.8	65.84	24.09	1.29997e+06	788130	656393	252957	1
1217	P25303	DnaJ-related protein SCJ1	High	High	Peak Found	High	High	0	6.455	6	2	4	2	377	41.5	7.43	6.18	2	0	1.288	0.973485	36.02	113.5	86.5	0.72	40.36	252749	424497	135263	132266	1
1219	P32897	Mitochondrial import inner membrane translocase subunit TIM23	Peak Found	High	High	High	High	0	13.059	23	3	7	3	222	23.2	7.4	17.33	3	0	1.322	0.973485	101.43	113.4	86.6	5.42	25.9	304036	468127	251830	94517	1
1220	P46990	60S ribosomal protein L17-B	High	High	High	High	High	0	63.347	50	10	87	1	184	20.5	10.92	249.63	10	0	1.309	0.973485	76.33	113.4	86.6	10.5	68.59	4.14925e+06	5.94439e+06	1622901	2.54398e+06	1
1224	Q12480	Probable electron transfer flavoprotein subunit alpha, mitochondrial	High	High	High	High	High	0	10.198	16	4	6	4	344	36.8	8.51	7.83	4	0	1.232	0.973485	51.88	113.1	86.9	9.98	7.02	135406	195443	95342.5	46926	1
1232	P53721	Respiratory supercomplex factor 2, mitochondrial	High	High	High	Peak Found	High	0	11.494	9	2	7	2	224	25.3	9.47	8	2	0	1.289	0.973485	70.25	112.6	87.4	23.62	69.18	203708	474486	102566	162555	1
1234	P35180	Mitochondrial import receptor subunit TOM20	High	High	High	High	High	0	19.196	33	5	14	5	183	20.3	5.71	28.71	5	0	1.575	0.973485	131.76	112.5	87.5	19.43	38.86	811713	1.02346e+06	388565	371287	1
1236	P20081	FK506-binding protein 1	High	High	Peak Found	Peak Found	High	0	4.108	10	1	2	1	114	12.2	6.04	2.17	1	0	1.281	0.973485	46.37	112.3	87.7	29.21	50.89	117779	128768	47900.1	55312.2	1
1243	P33331	Nuclear transport factor 2	High	Peak Found	Peak Found	Peak Found	High	0.01	2.368	6	1	1	1	125	14.4	4.7	2.09	1	0	1.272	0.973485	14.2	112	88	14.28	8.23	106500	216846	81844.6	49992.3	1
1254	P38711	40S ribosomal protein S27-B	High	High	High	High	High	0	5.684	18	2	11	2	82	8.9	9.14	16.76	2	0	1.298	0.973485	41	111.2	88.8	10.27	32.09	7.48362e+06	1.07566e+07	4.13357e+06	3.5665e+06	1
1258	P39009	DNA damage response protein kinase DUN1	High	High	Peak Found	Peak Found	High	0	4.592	3	2	3	2	513	58.6	7.88	3.45	2	0	1.24	0.973485	45.29	111	89	14.76	45.08	54390.4	111504	32617.6	34325.2	1
1263	Q04228	UBX domain-containing protein 2	High	High	High	High	High	0	10.509	7	4	7	4	584	66.7	5.45	14.15	4	0	1.289	0.973485	64.52	110.9	89.1	5.68	32.66	276560	424260	157910	137412	1
1266	P49167	60S ribosomal protein L38	High	High	High	High	High	0	23.134	50	6	35	6	78	8.8	10.93	77.9	6	0	1.369	0.973485	79.86	110.7	89.3	16.51	46.59	4.58249e+06	6.02582e+06	2.18715e+06	2.35732e+06	1
1267	P53262	V0 assembly protein 1	Peak Found	Peak Found	High	High	High	0.007	2.474	4	1	2	1	265	29.7	4.13	3.93	1	0	1.239	0.973485	44.24	110.7	89.3	21.07	46.33	100519	225613	62819.4	67427.7	1
1271	P13586	Calcium-transporting ATPase 1	High	High	High	High	High	0	24.244	8	7	22	7	950	104.5	5.68	45.16	7	0	1.327	0.973485	86.05	110.5	89.5	1.12	28.25	1.14167e+06	1.92826e+06	712637	580865	1
1276	P40481	Histidine protein methyltransferase 1	High	Peak Found	Peak Found	Peak Found	Medium	0.03	1.837	2	1	1	1	377	42.5	4.68	1.74	1	0	1.225	0.973485	39	110.1	89.9	16.02	39.98	64969	86028.9	33131.9	32210.8	1
1280	P12754	Translation initiation factor eIF-2B subunit delta	Peak Found	High	Peak Found	High	High	0	5.138	3	2	2	2	651	70.8	9.42	4.9	2	0	1.586	0.973485	84.38	109.9	90.1	38.18	28.83	64877.9	187633	53372.3	43874.7	1
1281	P38756	tRNA threonylcarbamoyladenosine dehydratase 1	High	High	High	Not Found	High	0.004	2.794	3	1	3	1	429	48.9	6.8	6.91	1	0	1.221	0.973485	14.49	109.9	90.1	13.76		71345.7	144185	60318.9		1
1282	P40499	Protein ICE2	Peak Found	High	High	Not Found	High	0	4.467	3	1	2	1	491	56.3	8.85	4.72	1	0	1.22	0.973485	21.06	109.9	90.1	19.89		37929.7	47511.1	25264.2		1
1286	P54000	RNA polymerase II transcriptional coactivator SUB1	High	High	Peak Found	High	High	0	6.98	13	3	4	3	292	33.1	5.63	8.51	3	0	1.256	0.973485	44.76	109.6	90.4	5.96	29.53	112050	171215	67046.6	55687.3	1
1287	Q12250	26S proteasome regulatory subunit RPN5	Peak Found	High	High	Peak Found	High	0.004	2.873	2	1	2	1	445	51.7	6.13	2.11	1	0	1.214	0.973485	85.83	109.6	90.4	8.24	73.97	69529.9	129909	31821.4	55243.9	1
1289	P37303	Low specificity L-threonine aldolase	Peak Found	High	Peak Found	Peak Found	Medium	0.031	1.811	3	1	1	1	387	42.8	6.29	2.73	1	0	1.21	0.973485	39.74	109.5	90.5	47.52	39.35	20828.4	69671.9	17179.6	16541.6	1
1293	P11075	Protein transport protein SEC7	High	High	Peak Found	Peak Found	Medium	0.011	2.313	0	1	2	1	2009	226.7	4.81	0	1	0	1.202	0.973485	63.07	109.2	90.8	16.02	60.86	30193.1	39979.4	13241.5	18073.4	1
1299	P46951	Cargo-transport protein YPP1	Peak Found	High	Peak Found	Not Found	Medium	0.021	2.108	1	1	1	1	817	95.3	5.35	0	1	0	1.198	0.973485	6.32	109	91	6.02		5394.89	9767.14	4398.96		1
1302	Q06346	Inositol phosphorylceramide synthase regulatory subunit KEI1	Peak Found	High	Peak Found	Peak Found	High	0.006	2.661	4	1	1	1	221	25.5	8.06	1.68	1	0	1.194	0.973485	32.85	108.9	91.1	25.05	36.23	34223.2	81388.5	24689.3	22667	1
1303	P25342	Cell division control protein 10	Peak Found	High	High	Peak Found	Medium	0.011	2.311	3	1	2	1	322	37	5.72	4.31	1	0	1.192	0.973485	93.45	108.8	91.2	4.17	77	55006.2	97000.2	24163	44541.4	1
1307	P05453	Eukaryotic peptide chain release factor GTP-binding subunit	High	High	High	High	High	0	32.11	15	8	23	8	685	76.5	7.01	54.53	8	0	1.324	0.973485	110.8	108.6	91.4	22.96	9.42	862628	1.99009e+06	749108	465345	1
1308	P42839	Low affinity vacuolar monovalent cation/H(+) antiporter	Peak Found	High	Peak Found	Peak Found	Medium	0.013	2.232	2	1	1	1	908	102.4	7.15	0	1	0	1.187	0.973485	35.68	108.6	91.4	13.12	36.11	16453.6	22710.8	9106.25	8345.99	1
1314	Q12166	2-isopropylmalate synthase 2, mitochondrial	Peak Found	High	Peak Found	Peak Found	Medium	0.021	2.087	1	1	1	1	604	67.2	6.77	0	1	0	1.184	0.973485	27.41	108.4	91.6	24.7	30.46	8573.63	20288	6500.92	5474.4	1
1315	Q12080	Ribosome biogenesis protein NOP53	Peak Found	Peak Found	Peak Found	High	Medium	0.032	1.787	2	1	1	1	455	52.5	9.35	0	1	0	1.183	0.973485	62.88	108.4	91.6	1.8	55.82	30269.3	51617.8	15984.7	20021.7	1
1316	Q3E6R5	Uncharacterized mitochondrial outer membrane protein YDR381C-A	Peak Found	High	High	Peak Found	High	0	3.869	14	1	2	1	114	12.7	9.74	2.51	1	0	1.182	0.973485	39.25	108.3	91.7	25.22	42.74	38404.1	91566.4	26669.1	27058.7	1
1320	P35177	Transcriptional activator SPT7	Peak Found	Peak Found	High	Peak Found	Medium	0.029	1.871	1	1	1	1	1332	152.5	4.87	0	1	0	1.176	0.973485	44.83	108.1	91.9	20.81	46.8	30201	67537.4	19779.9	21390.3	1
1322	P47018	Maintenance of telomere capping protein 1	High	High	High	High	High	0.001	3.037	2	1	4	1	478	53.4	4.59	7.1	1	0	1.172	0.973485	28.27	107.9	92.1	3.72	27.17	34355.5	60206.3	23196.8	18608.6	1
1323	P32618	Uncharacterized protein YEL043W	High	High	Peak Found	High	High	0.001	3.695	1	1	3	1	956	106.1	7.85	6.59	1	0	1.171	0.973485	69.81	107.9	92.1	3.41	61.44	35571	62061.5	18288.9	25218.2	1
1325	P02994	Elongation factor 1-alpha	High	High	High	High	High	0	105.516	43	16	161	16	458	50	9.04	391.43	16	0	1.36	0.973485	121.66	107.7	92.3	9.62	33.85	6.48234e+07	1.23502e+08	4.36331e+07	3.86487e+07	1
1327	Q03532	ATP-dependent RNA helicase HAS1	High	High	High	High	High	0	20.889	16	7	14	7	505	56.7	9.33	25.62	7	0	1.301	0.973485	45.43	107.6	92.4	12.68	39.79	983932	1.36671e+06	541890	525280	1
1331	Q08199	Nucleotide exchange factor SIL1	Not Found	High	Peak Found	High	High	0	5.089	4	1	2	1	421	48.2	5.55	6.48	1	0	1.159	0.973485	3.78	107.4	92.6		3.61		64569.9	30589.3	17500.3	1
1332	P0C2I2	Transposon Ty1-DR5 Gag-Pol polyprotein	High	High	High	High	High	0	62.84	16	20	38	9	1755	198.4	8.19	73.18	20	11	1.344	0.973485	103.6	107.1	92.9	12.84	28.22	4.62688e+06	9.22895e+06	3.36296e+06	2.73974e+06	1
1336	P36775	Lon protease homolog, mitochondrial	High	High	High	High	High	0	21.53	9	8	22	8	1133	127	5.59	38.32	8	0	1.367	0.973485	59.01	106.8	93.2	0.68	39.39	502387	827190	306649	295418	1
1342	P40056	Golgi to ER traffic protein 2	High	High	High	Peak Found	High	0	7.715	18	3	7	3	285	31.5	9.45	7.29	3	0	1.328	0.973485	90.55	105.7	94.3	2.68	30.34	420796	726566	445568	156642	1
1361	P25582	27S pre-rRNA (guanosine(2922)-2'-O)-methyltransferase	High	High	High	High	High	0	9.553	4	3	5	3	841	96.4	8.03	10.93	3	0	1.263	0.973485	89.15	104.7	95.3	7.34	84.67	363733	670895	163589	354260	1
1363	P47089	Translation machinery-associated protein 22	High	High	Peak Found	Peak Found	High	0	6.513	14	2	4	2	198	22.5	8.6	7.38	2	0	1.138	0.973485	65.86	104.4	95.6	26.54	28.05	76439.5	86921	44300.3	35998.9	1
1372	P25443	40S ribosomal protein S2	High	High	High	High	High	0	49.387	27	7	48	7	254	27.4	10.43	135.56	7	0	1.32	0.973485	96.91	103.9	96.1	33.96	54.25	1.11438e+07	1.13522e+07	5.04454e+06	6.1558e+06	1
1378	P12688	Serine/threonine-protein kinase YPK1	High	High	High	High	High	0	23.467	10	6	16	6	680	76.4	6.51	30.22	6	0	1.354	0.973485	62.93	103.5	96.5	1.44	41.45	1.42212e+06	2.41292e+06	928188	923004	1
1385	P25617	Uncharacterized protein YCR016W	High	High	Peak Found	Peak Found	High	0	5.777	8	2	3	2	290	33.6	7.93	4.63	2	0	1.564	0.973485	43.68	102.9	97.1	48.94	18.95	90944	73460.2	48909.6	34815.1	1
1414	P18562	Uracil phosphoribosyltransferase	High	High	Peak Found	High	High	0	13.195	19	4	11	4	216	24.6	5.74	21.91	4	0	1.277	0.973485	42.66	100.6	99.4	59.75	10.58	907704	612614	576472	269745	1
1424	P38764	26S proteasome regulatory subunit RPN1	High	High	High	High	High	0	30.665	11	10	23	10	993	109.4	4.63	48.91	10	0	1.365	0.973485	91.05	99.8	100.2	1.76	27.49	869769	1.41047e+06	663701	534902	1
1435	P38779	Proteasome-interacting protein CIC1	High	High	High	High	High	0	15.419	10	4	6	4	376	42.5	8.78	15.18	4	0	1.24	0.973485	89.63	98.5	101.5	11.65	25.03	278767	392896	206930	160868	1
1449	P19659	Mediator of RNA polymerase II transcription subunit 15	High	High	High	High	High	0	15.267	5	5	10	5	1081	120.2	9.8	16.84	5	0	1.228	0.973485	53.48	97.1	102.9	23.54	23.42	140725	167180	99823.9	75808.7	1
1459	Q07896	Nucleolar complex-associated protein 3	Peak Found	High	High	Peak Found	High	0	6.094	3	2	3	2	663	75.5	5.95	5.78	2	0	1.163	0.973485	126.47	95.8	104.2	0.8	69.92	54143.9	89002.4	31907.9	51271.7	1
1464	P12684	3-hydroxy-3-methylglutaryl-coenzyme A reductase 2	High	High	High	High	High	0	39.98	13	12	32	11	1045	115.6	7.58	73.7	12	0	1.573	0.973485	77.02	95.4	104.6	5.43	25.99	1.0631e+06	1.90867e+06	1.36633e+06	512123	1
1465	P32500	Nucleoporin NDC1	High	High	High	Peak Found	High	0	4.931	3	2	3	2	655	74.1	8.34	6.67	2	0	1.189	0.973485	31.12	95.4	104.6	3.5	46.65	66640.5	116414	49739.6	53664.6	1
1468	P80210	Adenylosuccinate synthetase	High	High	High	High	High	0	31.305	19	7	19	7	433	48.2	8.13	39.79	7	0	1.654	0.973485	82.51	95.2	104.8	50.88	9.25	1.05535e+06	3.72639e+06	1.69089e+06	806351	1
1499	P04801	Threonine--tRNA ligase, cytoplasmic	High	High	Peak Found	High	High	0	19.845	8	5	11	5	734	84.5	7.03	21.28	5	0	1.51	0.973485	77.04	92.5	107.5	17.16	44.09	299042	634512	266204	275831	1
1545	P51996	GTP-binding protein YPT32/YPT11	High	High	High	High	High	0	18.279	28	5	17	2	222	24.5	5.49	42.79	5	3	1.58	0.973485	115.28	87.1	112.9	9.35	53.56	1.60781e+06	2.34143e+06	1.22626e+06	1.4794e+06	1
1603	P25694	Cell division control protein 48	High	High	High	High	High	0	16.149	6	4	9	4	835	91.9	4.94	21.23	4	0	1.295	0.973485	128.01	76.9	123.1	9.54	117.26	368533	535294	1.68901e+06	85767.3	1
1132	Q06328	Probable vacuolar amino acid transporter YPQ2	High	High	High	Not Found	High	0	7.166	5	1	4	1	317	35.2	5	12.18	1	0	1.467	0.973978	26.85	118.9	81.1	25.2		51848.5	123576	39621.7		1
1056	P11655	Guanine nucleotide-exchange factor SEC12	High	High	Peak Found	High	High	0	6.932	6	2	5	2	471	51.6	6.76	10.45	2	0	1.564	0.974914	33.72	123.5	76.5	2.79	32.1	2.02814e+06	3.24135e+06	915054	789556	1
1044	P15705	Heat shock protein STI1	High	High	High	High	High	0	30.503	19	8	20	8	589	66.2	5.59	40.92	8	0	1.563	0.974921	80.47	124.1	75.9	2.56	36.44	647891	1.03888e+06	279842	257762	1
1171	P38626	NADH-cytochrome b5 reductase 1	High	High	High	High	High	0	13.677	16	5	9	5	284	31.5	8.78	17.61	5	0	1.372	0.974921	75.22	116.4	83.6	31.21	36.19	651544	691522	269516	247305	1
1121	P21373	NAD(+) kinase	Peak Found	High	Peak Found	Peak Found	High	0.001	3.297	2	1	1	1	530	59.4	7.17	2.4	1	0	1.483	0.975763	59.47	119.5	80.5	0.94	52.95	26383.7	44453.3	11309.4	13508.1	1
1150	P53244	Arrestin-related trafficking adapter 5	High	Peak Found	Peak Found	Peak Found	Medium	0.039	1.705	2	1	1	1	586	65.4	8.32	1.72	1	0	1.433	0.976163	37.59	117.8	82.2	46.48	43.33	35298.9	116138	23636.4	24201.9	1
442	P00899	Anthranilate synthase component 1	High	High	High	High	High	0	18.964	13	5	13	5	507	56.7	5.86	34	5	0	1.378	0.979223	65.18	160.4	39.6	31.7	32.5	558999	1.46635e+06	128471	111527	1
458	P06782	Carbon catabolite-derepressing protein kinase	High	High	Peak Found	Peak Found	High	0	10.313	7	3	4	3	633	72	6.65	7.94	3	0	1.481	0.979267	75.05	159.4	40.6	2.69	27.33	138925	222360	26708.8	21475.8	1
868	P28834	Isocitrate dehydrogenase	High	High	High	High	High	0	21.613	19	7	16	7	360	39.3	9	27.44	7	0	1.379	0.979267	108.98	132.8	67.2	5.57	36.66	796705	1.2242e+06	473508	151432	1
918	P53199	Sterol-4-alpha-carboxylate 3-dehydrogenase ERG26, decarboxylating	High	High	High	High	High	0	15.501	20	5	11	5	349	38.7	6.68	25.18	5	0	1.379	0.979267	35.24	130.4	69.6	25.49	9.31	1.45106e+06	1.67558e+06	565584	350782	1
845	P38891	Branched-chain-amino-acid aminotransferase, mitochondrial	High	High	High	Peak Found	High	0	10.132	10	3	6	3	393	43.6	8.91	14.47	3	0	1.271	0.979575	20.86	134.1	65.9	33.53	18.55	162516	166616	67038.3	27990.5	1
647	P33298	26S proteasome regulatory subunit 6B homolog	High	High	High	Peak Found	High	0	24.882	21	7	16	6	428	47.9	5.53	34.63	7	1	1.381	0.980273	33.98	144.5	55.5	19.61	22.67	2.75642e+06	3.46628e+06	733741	551182	1
746	P36516	54S ribosomal protein L3, mitochondrial	Peak Found	High	High	High	High	0	5.78	5	2	4	2	390	44	9.42	8.08	2	0	1.278	0.981341	30.3	139.2	60.8	8.88	28.69	138357	202839	43288.1	35508.7	1
752	P13663	Aspartate-semialdehyde dehydrogenase	High	High	High	High	High	0	22.74	27	8	24	8	365	39.5	6.73	34.85	8	0	1.552	0.981341	68.96	139	61	27.52	34.85	2.64074e+06	2.95984e+06	693141	623215	1
832	P32502	Translation initiation factor eIF-2B subunit beta	High	High	High	High	High	0	7.929	8	3	6	3	381	42.5	7.93	8.19	3	0	1.506	0.981341	20.95	135	65	6.25	13.08	205322	372913	88260	57761.3	1
1022	P16862	ATP-dependent 6-phosphofructokinase subunit beta	High	High	High	High	High	0	99.371	30	21	93	20	959	104.6	6.67	194.35	21	0	1.55	0.981341	92.4	125	75	0.66	58.96	8.08386e+06	1.35657e+07	2.92926e+06	3.86969e+06	1
1129	Q08967	Flavin carrier protein 1	Peak Found	High	Peak Found	Not Found	Medium	0.035	1.747	2	1	1	1	793	89.2	8.05	1.65	1	0	1.473	0.984504	7.1	119.1	80.9	6.77		19772.1	36176.3	13180.7		1
438	Q04869	Uncharacterized protein YMR315W	High	High	High	Peak Found	High	0	8.931	16	4	6	4	349	38.2	6.62	11.68	4	0	1.5	0.984548	41.37	160.7	39.3	11.58	40.36	588801	830710	92503.5	90457.9	1
1124	P22147	5'-3' exoribonuclease 1	High	High	Peak Found	High	High	0	8.234	2	3	4	3	1528	175.4	7.47	8.64	3	0	1.497	0.984548	81.03	119.4	80.6	35.09	19.75	74928	206802	52994.2	38163.2	1
772	P40341	Mitochondrial respiratory chain complexes assembly protein YTA12	High	High	High	Not Found	High	0	12.426	8	4	9	3	825	93.2	7.56	19.84	4	0	1.448	0.985134	35.2	138.2	61.8	27.83		87966	98158.1	30175.6		1
1338	P38820	Adenylyltransferase and sulfurtransferase UBA4	High	High	Peak Found	High	High	0	5.507	4	2	3	2	440	49.3	6.54	5.76	2	0	1.275	0.985134	113.23	106.6	93.4	29.25	28.87	59472.9	150446	48903.9	40224.1	1
1089	Q06679	U3 small nucleolar RNA-associated protein 4	High	High	Peak Found	High	High	0	5.103	2	2	3	2	776	87.7	6.57	6.32	2	0	1.281	0.985674	72.1	121.7	78.3	39.96	72.24	60467	179710	27722.7	46548.1	1
1393	P53206	Putative mitochondrial cysteine synthase	High	High	High	High	High	0	22.539	21	7	17	7	393	42.8	8.24	41.93	7	0	1.542	0.985915	49.69	102.3	97.7	30.54	3.32	435143	1.12189e+06	496075	257325	1
404	P38795	Glutamine-dependent NAD(+) synthetase	High	High	Peak Found	Peak Found	High	0	7.476	7	3	3	3	714	80.6	6.54	4.36	3	0	1.268	0.985978	41.03	164.1	35.9	7.24	110.78	89504	134307	6070.91	27166.4	1
756	P07259	Protein URA2	High	High	High	High	High	0	292.27	37	69	263	67	2214	244.9	5.83	583.56	69	2	1.538	0.985978	98.42	138.8	61.2	3.72	6.37	2.76329e+07	4.84237e+07	1.22462e+07	6.08393e+06	1
988	P42943	T-complex protein 1 subunit eta	High	High	High	High	High	0	42.045	25	12	32	12	550	59.7	5.55	61.84	12	0	1.54	0.985978	80.49	126.6	73.4	2.38	36.18	2.97477e+06	5.11494e+06	1.26309e+06	1.15869e+06	1
1139	P80428	Actin-related protein 4	Peak Found	High	Peak Found	Peak Found	High	0.003	2.935	2	1	1	1	489	54.8	5.45	2.24	1	0	1.454	0.985978	41.19	118.5	81.5	41.85	15.33	16899.2	51712.4	13244.1	8951.02	1
1160	P53739	Flippase kinase 1	Peak Found	High	Not Found	Peak Found	High	0.001	3.486	1	1	1	1	893	100.5	7.97	2.18	1	0	1.411	0.985978	13.32	117	83	12.65		30095.1	59866.5		11877.1	1
1207	Q12133	Signal peptidase complex subunit 3	High	High	High	High	High	0	15.631	18	4	10	4	184	21.3	8.7	19.59	4	0	1.393	0.985978	104.66	114.2	85.8	9.56	15.62	560821	814304	412133	179474	1
1239	Q04279	Eisosome protein SEG1	Peak Found	Peak Found	High	Peak Found	Medium	0.032	1.803	1	1	1	1	960	105.8	9.72	1.93	1	0	1.275	0.985978	38.54	112.1	87.9	2.92	36.27	28534.6	45519.6	15787.7	14504.6	1
1259	P53082	BolA-like protein 2	Peak Found	High	Peak Found	Peak Found	High	0.003	2.956	10	1	1	1	120	14.1	8.28	2.57	1	0	1.248	0.985978	88.63	111	89	35.54	86.48	26993.6	75006	12855.3	28989.8	1
1553	P09938	Ribonucleoside-diphosphate reductase small chain 1	High	High	High	High	High	0	4.263	6	2	4	2	399	46.1	5.25	1.82	2	0	1.538	0.985978	80.05	85.7	114.3	22.74	26.12	4.51261e+07	5.42404e+07	3.97496e+07	3.14005e+07	1
564	P25334	Peptidyl-prolyl cis-trans isomerase CPR4	High	High	Peak Found	Peak Found	High	0	8.329	13	3	4	3	318	35.8	6.9	10.85	3	0	1.49	0.987308	9.08	151.8	48.2	5.58	8.95	262934	403954	79971.1	38301.8	1
677	Q12375	Mitochondrial ornithine transporter 1	High	High	Peak Found	High	High	0	8.312	11	3	6	3	292	31.5	9.2	8.92	3	0	1.42	0.987308	22.93	142.8	57.2	32.84	80.51	65217.6	174011	16221.7	32129.5	1
833	Q12692	Histone H2A.Z	High	High	High	High	High	0	11.38	30	4	10	3	134	14.3	10.65	17.68	4	1	1.533	0.987308	94.67	135	65	22.66	90.11	976612	1.17523e+06	176210	432282	1
1111	P38710	Inositol monophosphatase 1	High	High	High	Peak Found	High	0.001	3.422	4	1	3	1	295	32.8	5.3	6.82	1	0	1.509	0.987308	47.31	120.3	79.7	33.22	53.13	202865	208974	66728.3	79937.4	1
1130	Q06266	Protein TOS4	Peak Found	High	Not Found	Peak Found	Medium	0.025	1.941	4	1	1	1	489	55.4	9.35	0	1	0	1.471	0.987308	7.03	119.1	80.9	6.7		6462.29	9772.31		2132.52	1
1237	Q08822	Probable electron transfer flavoprotein-ubiquinone oxidoreductase, mitochondrial	High	High	Peak Found	High	Medium	0.011	2.298	2	1	3	1	631	69.6	7.83	6.17	1	0	1.278	0.987308	39.81	112.2	87.8	16.25	40.8	66525.7	87805.5	32267.2	31769.2	1
1300	P12612	T-complex protein 1 subunit alpha	High	High	High	High	High	0	41.647	22	11	42	11	559	60.4	6.49	84.12	11	0	1.397	0.987308	41.87	109	91	18.14	17.34	4.75109e+06	6.10275e+06	2.88823e+06	2.00906e+06	1
511	P32794	ATPase family gene 2 protein	High	High	High	High	High	0	20.286	10	6	12	6	780	84.7	5.71	22.96	6	0	1.527	0.987549	117.07	155.5	44.5	0.03	10.83	579096	962403	143574	90999.2	1
527	P38689	Ribose-phosphate pyrophosphokinase 3	High	High	Peak Found	High	High	0	21.165	22	7	16	7	320	35.1	8.29	31.59	7	0	1.403	0.987549	127.92	153.8	46.2	18.27	55.47	2.65263e+06	3.40111e+06	432817	538967	1
685	P53049	Oligomycin resistance ATP-dependent permease YOR1	High	High	High	High	High	0	15.84	4	6	9	6	1477	166.6	7.68	20.28	6	0	1.484	0.987549	59.82	142.4	57.6	16.77	45.52	196593	414762	60029.9	63618.6	1
697	P38708	Putative proline--tRNA ligase YHR020W	High	High	High	High	High	0	64.116	29	17	50	17	688	77.3	6.4	106.01	17	0	1.526	0.987549	72.01	141.9	58.1	2.44	2.03	2.64119e+06	4544948	1.01533e+06	568012	1
726	P23641	Mitochondrial phosphate carrier protein	High	High	High	High	High	0	52.544	41	10	52	10	311	32.8	9.31	135.51	10	0	1.407	0.987549	137.54	140.5	59.5	5.57	36.05	3.63683e+06	6.54211e+06	1.94841e+06	628934	1
748	P0CX35	40S ribosomal protein S4-A	High	High	High	High	High	0	72.306	62	17	84	17	261	29.4	10.08	149.71	17	0	1.523	0.987549	93.54	139.1	60.9	24.64	49.07	4.10835e+07	4.80327e+07	9.84375e+06	1.10381e+07	1
784	P32568	Protein SNQ2	High	High	High	High	High	0	59.945	15	18	44	17	1501	168.7	7.62	89.22	18	1	1.409	0.987549	69.48	137.7	62.3	11.24	32	2.26604e+06	4.41785e+06	825445	711220	1
792	P24276	Protein SSD1	High	High	Not Found	Peak Found	High	0	4.862	2	2	3	2	1250	139.9	7.64	7.39	2	0	1.448	0.987549	36.76	137.4	62.6	26.36		102217	247808		28652.9	1
855	P53250	Twinfilin-1	Peak Found	High	High	Peak Found	High	0	9.013	9	2	4	2	332	37	5.78	10.82	2	0	1.299	0.987549	39.67	133.4	66.6	1.18	37.05	114779	187674	40644.3	37782.8	1
907	P39968	Vacuolar protein 8	High	High	High	High	High	0	26.885	13	6	18	6	578	63.2	5.14	41.01	6	0	1.529	0.987549	70.74	130.8	69.2	6.06	23.8	1.20549e+06	2.18349e+06	525749	401458	1
1060	P32419	Malate dehydrogenase, peroxisomal	High	High	Peak Found	High	High	0	5.645	5	2	4	2	343	37.2	9.2	6.02	2	0	1.495	0.987549	48.41	123.3	76.7	7.62	44.91	176216	326332	77964.2	81831.1	1
1083	P33442	40S ribosomal protein S1-A	High	High	High	High	High	0	51.471	44	13	77	3	255	28.7	9.99	151.5	13	0	1.529	0.987549	70.56	122.3	77.7	4.12	58.04	8.68065e+06	1.36145e+07	3.24028e+06	4.21358e+06	1
1168	Q07824	Polyamine transporter 1	High	High	High	Peak Found	High	0	4.749	3	1	3	1	586	64.2	6.87	7.78	1	0	1.396	0.987549	23.06	116.5	83.5	16.23	24.32	30790.4	64466.9	19474	14984.4	1
1179	P40040	Protein THO1	High	High	High	High	High	0	20.393	36	6	14	6	218	24.1	7.25	35.61	6	0	1.481	0.987549	71.97	115.9	84.1	20.52	16.57	511432	634802	267059	183727	1
1218	P38088	Glycine--tRNA ligase 1, mitochondrial	High	High	High	High	High	0	118.299	40	26	120	26	690	78.1	6.52	287.66	26	0	1.405	0.987549	92.04	113.5	86.5	4.98	28.74	1.55958e+07	2.41629e+07	8.74678e+06	7.1805e+06	1
1235	P32790	Actin cytoskeleton-regulatory complex protein SLA1	Peak Found	High	Peak Found	Not Found	High	0.006	2.682	1	1	1	1	1244	135.8	5.88	2.81	1	0	1.285	0.987549	20.9	112.5	87.5	19.74		21120.6	46509.7	17713.7		1
701	P53111	NADPH-dependent aldehyde reductase ARI1	High	High	High	Peak Found	High	0	8.688	10	3	7	3	347	38.1	5.88	15.78	3	0	1.37	0.99029	64.99	141.8	58.2	3.81	58.77	206006	324539	49500.7	65180.6	1
798	P27809	Glycolipid 2-alpha-mannosyltransferase	High	High	High	High	High	0	38.538	38	10	23	10	442	51.4	5.4	45.19	10	0	1.42	0.99029	68.35	137	63	5.3	51.68	874793	1.34937e+06	532456	134526	1
843	P51601	GTP cyclohydrolase 1	High	High	High	Not Found	High	0.001	3.708	7	2	3	2	243	27.8	7.23	3.5	2	0	1.417	0.99029	192.56	134.3	65.7	17.81		53476.2	114524	27818.1		1
926	P25045	Serine palmitoyltransferase 1	High	High	High	High	High	0	27.177	21	8	20	8	558	62.2	6.18	40.09	8	0	1.514	0.99029	78.84	129.7	70.3	17.63	47.67	1.69887e+06	2.19843e+06	535428	587078	1
961	P10081	ATP-dependent RNA helicase eIF4A	High	High	High	High	High	0	37.309	25	10	25	10	395	44.7	5.12	59.4	10	0	1.415	0.99029	103.04	127.9	72.1	8.64	13.44	1.45362e+06	2.73127e+06	742054	488160	1
972	P23585	High-affinity glucose transporter HXT2	High	High	High	Peak Found	High	0	11.895	8	4	5	3	541	59.8	8.32	12.62	4	0	1.408	0.99029	52.04	127.5	72.5	46.35	25.74	688504	579566	216771	170296	1
981	P00830	ATP synthase subunit beta, mitochondrial	High	High	High	High	High	0	32.922	16	7	45	7	511	54.8	5.71	105.11	7	0	1.419	0.99029	22.69	126.8	73.2	13.95	36.83	6.31069e+06	1.27876e+07	4.91335e+06	1.56721e+06	1
1028	P39685	Nucleoporin POM152	High	High	High	High	High	0	54.568	17	16	26	16	1337	151.6	6.74	62.22	16	0	1.422	0.99029	70.11	124.8	75.2	12.54	49.08	926588	1.84015e+06	397746	446055	1
1032	P32467	Low-affinity glucose transporter HXT4	High	High	High	High	High	0	45.214	18	10	41	9	576	63.9	6.67	95.65	10	1	1.413	0.99029	120.3	124.5	75.5	1.17	22.2	4.59126e+06	7.76002e+06	2.24156e+06	1.6725e+06	1
1037	P07342	Acetolactate synthase catalytic subunit, mitochondrial	High	High	High	High	High	0	51.159	25	13	45	13	687	74.9	8.51	101.46	13	0	1.415	0.99029	80.59	124.3	75.7	1.19	16.47	5.30628e+06	8.67426e+06	2.6704e+06	1.83451e+06	1
1070	P40008	Protein FMP52, mitochondrial	High	High	High	Peak Found	High	0	7.707	15	3	6	3	231	25.1	9.25	8.67	3	0	1.46	0.99029	49.09	122.9	77.1	9.51	14.14	339427	645664	235613	104801	1
1221	Q01477	Ubiquitin carboxyl-terminal hydrolase 3	High	High	High	High	High	0	14.794	7	5	10	5	912	101.9	7.84	23.2	5	0	1.473	0.99029	79.43	113.4	86.6	12.24	15.73	189470	374690	132067	89762.9	1
1226	Q06833	Nucleus-vacuole junction protein 2	High	High	High	High	High	0	11.794	5	3	7	3	770	87.3	7.9	15.68	3	0	1.464	0.99029	102.72	113	87	5.28	65.53	338824	522783	142347	211021	1
1230	P38428	Coupling of ubiquitin conjugation to ER degradation protein 1	High	High	High	High	High	0	5.891	7	1	4	1	203	22.7	6.7	11.66	1	0	1.291	0.99029	13.17	112.7	87.3	7.6	13.19	70117	104680	52896.4	23848.2	1
1333	P32591	SWI/SNF complex subunit SWI3	High	High	High	Peak Found	High	0	11.425	5	4	5	4	825	92.9	4.86	10.58	4	0	1.453	0.99029	80.63	107	93	49.8	15.7	63084.3	218889	66281.6	45030.3	1
1334	Q04969	Signal peptidase complex subunit 2	High	High	High	Peak Found	High	0	10.862	16	3	5	3	178	20.8	9.23	12.58	3	0	1.318	0.99029	32.51	107	93	54.31	80.89	111728	82668	116161	17192.8	1
1341	P24280	SEC14 cytosolic factor	High	High	High	Peak Found	High	0	11.013	13	4	5	4	304	34.9	5.49	8.86	4	0	1.469	0.99029	80.72	105.8	94.2	14.87	51.53	230629	310466	118149	137875	1
1629	P40081	Putative magnesium-dependent phosphatase YER134C	High	Peak Found	High	High	High	0	8.315	19	3	6	3	178	20.4	6.77	12.4	3	0	1.317	0.99029	16.94	69.5	130.5	80.27	6.81	148050	67890.2	130322	78015.7	1
1101	Q04767	Golgi apparatus membrane protein TVP18	High	High	High	High	High	0	17.081	15	2	9	2	167	18.7	6.76	23.23	2	0	1.424	0.990428	41.61	121.1	78.9	29.89	48.96	605077	1.54511e+06	318488	356515	1
1149	P33201	Ribosome assembly factor MRT4	High	High	High	High	High	0	20.943	28	6	21	6	236	27	8.56	47.43	6	0	1.423	0.990428	66.14	117.9	82.1	1.32	29.28	1.16985e+06	1.909e+06	613024	507320	1
1512	P39010	Palmitoyltransferase AKR1	High	High	High	High	High	0	17.82	11	6	9	6	764	85.8	5.72	19.41	6	0	1.379	0.990428	74.76	91.1	108.9	25.69	7.62	101336	243287	129258	78273.8	1
799	P06106	Homocysteine/cysteine synthase	High	High	High	High	High	0	19.412	17	6	16	6	444	48.6	6.43	39.43	6	0	1.427	0.992774	51.56	137	63	9.7	72.25	822012	1.19123e+06	188188	316014	1
1222	P09232	Cerevisin	High	High	High	High	High	0	20	13	6	10	6	635	69.6	6.39	19.84	6	0	1.382	0.992774	68.48	113.4	86.6	69.31	31.28	194590	945373	297956	103305	1
690	P32468	Cell division control protein 12	High	High	High	Peak Found	High	0	10.852	12	3	7	3	407	46.6	7.99	7.73	3	0	1.427	0.994215	28.97	142	58	7.93	8.87	98337.8	146128	37843.8	18144.2	1
1228	P53829	Protein CAF40	High	High	High	Peak Found	High	0	7.51	8	3	8	3	373	41.1	7.12	17.29	3	0	1.384	0.994215	33.31	112.9	87.1	42.15	24.54	187792	577377	154875	119542	1
1146	P36100	Transcription initiation factor IIE subunit alpha	Peak Found	High	Peak Found	Peak Found	Medium	0.022	2.052	2	1	1	1	482	54.7	4.51	0	1	0	1.442	0.995015	49.02	118.1	81.9	56.85	63.88	10283.7	40082.8	6283.58	9044.35	1
600	P35194	U3 small nucleolar RNA-associated protein 20	High	High	High	Peak Found	High	0	12.742	1	4	6	4	2493	287.4	7.03	8.36	4	0	1.341	0.995045	58.21	148.4	51.6	29.64	82.05	172196	187065	23373.2	47822.3	1
828	P37296	V-type proton ATPase subunit a, Golgi isoform	High	High	High	High	High	0	20.586	8	7	14	7	890	101.6	5.38	27.39	7	0	1.394	0.995045	77.69	135.3	64.7	5.43	56.19	462905	831014	141352	178174	1
1162	P32047	Protein MLF3	High	High	Peak Found	Peak Found	High	0.01	2.349	4	1	2	1	452	49.2	7.81	4.2	1	0	1.403	0.995045	47.43	116.8	83.2	21.43	49.39	30244.8	37051.2	12031.9	13560.9	1
1209	P04050	DNA-directed RNA polymerase II subunit RPB1	High	High	Peak Found	Peak Found	High	0	7.691	2	3	6	2	1733	191.5	5.63	12.51	3	0	1.323	0.995045	47.83	114.1	85.9	5.8	51.28	57870.9	104435	29086.1	33803	1
1343	P42846	Protein KRI1	High	High	High	Peak Found	High	0	10.815	8	4	5	4	591	68.6	5.1	11.99	4	0	1.376	0.995045	45.85	105.6	94.4	19.23	35.97	213261	269682	119930	109672	1
1421	P49435	Adenine phosphoribosyltransferase 1	Peak Found	High	High	High	High	0	4.78	10	2	4	2	187	20.6	5.1	3.8	2	0	1.41	0.995045	110.7	100	100	41.48	41.96	73428.9	223411	68503.5	68659.8	1
1192	P39960	GTPase-activating protein BEM2/IPL2	Peak Found	High	Not Found	Peak Found	Medium	0.022	2.027	1	1	1	1	2167	245.3	8.38	2.56	1	0	1.361	0.995098	41.15	115.3	84.7	37.82		75709.2	217767		37241.4	1
452	Q03124	Chromatin structure-remodeling complex subunit RSC9	Peak Found	High	Peak Found	Not Found	High	0	5.782	4	2	2	2	581	65.2	7.83	4.69	2	0	1.379	0.995149	9.71	159.8	40.2	10.76		75704.9	108067	16522.3		1
455	P47108	Nucleolar pre-ribosomal-associated protein 2	High	High	Peak Found	Peak Found	High	0	4.657	2	2	2	2	1174	135	6.38	1.7	2	0	1.406	0.995149	26.13	159.5	40.5	11.59	26.24	23550.7	46142.1	5043.79	3991.35	1
546	P53941	U3 small nucleolar ribonucleoprotein protein IMP4	High	High	High	Peak Found	High	0	6.171	7	2	4	2	290	33.5	9.06	8.78	2	0	1.348	0.995149	68.75	152.5	47.5	29.38	59.49	84339.2	213753	19368.9	25820.8	1
749	P53091	DNA replication licensing factor MCM6	High	High	Peak Found	High	High	0	18.47	6	5	9	5	1017	112.9	5.16	22.3	5	0	1.401	0.995149	46.01	139.1	60.9	6.82	48.69	288478	435472	78783	87802.2	1
814	Q12675	Phospholipid-transporting ATPase DNF2	High	High	High	High	High	0	37.873	10	12	26	9	1612	182.5	6.18	57.46	12	3	1.439	0.995149	53.07	136.3	63.7	5.92	18.44	430715	658518	206165	86218.6	1
906	P14742	Glutamine--fructose-6-phosphate aminotransferase	High	High	High	High	High	0	36.465	17	9	28	9	717	80	6.43	60.95	9	0	1.491	0.995149	78.41	130.9	69.1	17.42	34.4	2.48587e+06	3.22622e+06	847079	756569	1
964	P47912	Long-chain-fatty-acid--CoA ligase 4	High	High	High	High	High	0	55.494	20	13	53	12	694	77.2	6.55	114.03	13	1	1.486	0.995149	102.47	127.8	72.2	11.06	32.1	3.94713e+06	5.61043e+06	1.53145e+06	1.32143e+06	1
1034	P10622	60S acidic ribosomal protein P1-beta	High	High	High	High	High	0	37.185	47	2	61	2	106	10.7	4.01	221.79	2	0	1.485	0.995149	35.45	124.4	75.6	19.98	31.55	1.16255e+07	1.4543e+07	7.20066e+06	2.48655e+06	1
1065	P32074	Coatomer subunit gamma	High	High	High	High	High	0	31.757	13	10	21	10	935	104.8	5.12	41.64	10	0	1.442	0.995149	78.44	123.1	76.9	13.18	33.11	657440	1.31767e+06	332743	291505	1
1068	Q12464	RuvB-like protein 2	High	High	High	High	High	0	7.18	6	3	7	3	471	51.6	5.31	12.64	3	0	1.401	0.995149	32.65	123	77	14.3	36.81	298020	606901	148252	137309	1
1081	P32836	GTP-binding nuclear protein GSP2/CNR2	High	High	High	High	High	0	24.001	26	6	23	6	220	25	6.68	52.38	6	0	1.441	0.995149	47.71	122.4	77.6	9.24	39.98	1.48683e+06	2.16883e+06	618772	601509	1
1090	P30605	Myo-inositol transporter 1	High	High	Peak Found	High	High	0	6.362	3	2	4	2	584	63.5	6.54	6.8	2	0	1.373	0.995149	38.58	121.7	78.3	19.21	36.44	79254.2	100249	31970.5	29444.3	1
1142	P40159	Uncharacterized protein YNL208W	High	High	High	High	High	0	3.826	12	1	4	1	199	20.1	7.64	4.37	1	0	1.448	0.995149	38.31	118.3	81.7	2.1	35.88	157481	254148	77421.2	70704.8	1
1165	Q12010	Probable vacuolar amino acid transporter YPQ1	Peak Found	Peak Found	High	Peak Found	Medium	0.021	2.098	3	1	1	1	308	34.9	4.92	1.83	1	0	1.398	0.995149	29.24	116.6	83.4	18.22	30.98	19068.2	41078.3	18164.9	6326.12	1
1169	P05318	60S acidic ribosomal protein P1-alpha	High	High	Not Found	High	High	0	13.301	57	3	15	3	106	10.9	3.88	37.56	3	0	1.457	0.995149	132.86	116.5	83.5	69.21		302388	172363		64558.7	1
1176	P21801	Succinate dehydrogenase	High	Peak Found	Peak Found	Peak Found	Medium	0.031	1.832	5	1	1	1	266	30.2	8.82	0	1	0	1.385	0.995149	30.11	116.1	83.9	27.91	34.04	23212.1	57569.6	24507.7	8153.2	1
1183	P11746	Pheromone receptor transcription factor	Peak Found	High	Peak Found	Peak Found	High	0.001	3.421	4	1	1	1	286	32.8	5.12	1.7	1	0	1.374	0.995149	39.02	115.7	84.3	26.98	43.01	25225.1	61715.2	15234.1	15520.3	1
1216	P53881	54S ribosomal protein L22, mitochondrial	High	High	Peak Found	High	High	0	6.579	8	2	4	2	309	34.9	9.98	8.67	2	0	1.315	0.995149	37.2	113.6	86.4	3.49	35.22	37991.9	66359	21501.1	19441.9	1
1227	P53137	RQC trigger complex subunit CUE3	High	High	High	Peak Found	High	0.001	3.485	2	1	3	1	624	72	6.98	5.88	1	0	1.298	0.995149	11.61	113	87	7.32	11.62	52674.7	78958.1	33237.1	21304.5	1
1292	Q07807	mRNA-binding protein PUF3	High	High	Peak Found	Peak Found	High	0	4.497	3	2	2	2	879	98	7.21	2.67	2	0	1.374	0.995149	50.54	109.3	90.7	1.4	32.15	119888	195406	73239.8	63248	1
1294	P04037	Cytochrome c oxidase subunit 4, mitochondrial	High	High	High	High	High	0	15.215	41	4	10	4	155	17.1	6.9	21.76	4	0	1.49	0.995149	78.11	109.2	90.8	8.71	59.02	665918	1.25238e+06	860069	192207	1
1324	P31374	Serine/threonine-protein kinase PSK1	High	High	Peak Found	High	High	0	10.847	5	4	6	4	1356	152.2	5.72	4.42	4	0	1.404	0.995149	63	107.9	92.1	15.83	45.37	115568	153456	59167.1	62556	1
1409	Q08409	ATP-dependent permease AUS1	High	High	High	High	High	0	24.747	7	7	14	7	1394	157.7	7.2	30.09	7	0	1.489	0.995149	100.14	100.9	99.1	15.68	32.57	445454	925246	362086	314632	1
1429	P32266	Dynamin-like GTPase MGM1, mitochondrial	High	High	Peak Found	High	High	0	12.201	5	4	5	4	881	99.1	7.59	10.64	4	0	1.354	0.995149	81.71	99.6	100.4	11.34	24.57	75650.4	147700	64980.6	50179.6	1
1455	P54070	Mannosyltransferase KTR6	High	Peak Found	High	Peak Found	High	0	6.031	6	2	3	2	446	52.1	5.5	7.45	2	0	1.304	0.995149	126.5	96.2	103.8	36.31	79.49	40598.8	39920.4	59585.2	9081.68	1
396	Q05787	ERAD-associated E3 ubiquitin-protein ligase component HRD3	High	High	Peak Found	High	High	0	7.09	4	2	5	2	833	95.4	6.61	11.73	2	0	1.377	0.995312	43.18	164.9	35.1	42.56	116.62	57246.9	177125	4822.81	27277.5	1
1187	P19807	Choline transport protein	Peak Found	High	Peak Found	Not Found	High	0.003	2.935	2	1	1	1	563	62	6.86	2.57	1	0	1.363	0.995383	36.11	115.4	84.6	33.47		58335.9	157114	51000.5		1
415	P32492	Myosin-4	High	High	Peak Found	Peak Found	High	0	17.818	6	6	8	4	1471	169.2	7.64	19.51	6	0	1.333	0.99599	46.41	162.4	37.6	24.65	42.25	75188	177786	14261.8	14358.3	1
540	P14540	Fructose-bisphosphate aldolase	High	High	High	High	High	0	57.207	36	10	48	10	359	39.6	5.78	125.96	10	0	1.452	0.99599	112.23	153	47	23.1	37.35	3.06306e+06	3.66253e+06	569479	531765	1
969	P32497	Eukaryotic translation initiation factor 3 subunit C	High	High	High	High	High	0	34.234	11	8	32	8	812	93.1	5	77.12	8	0	1.454	0.99599	58.51	127.6	72.4	8.19	8.45	2.04415e+06	3.81607e+06	1.083e+06	663581	1
1055	P39985	rDNA transcriptional regulator POL5	High	High	High	Peak Found	High	0.001	3.686	2	2	4	2	1022	115.8	5.33	5.51	2	0	1.306	0.99599	45.79	123.7	76.3	44.91	46.21	34419.3	110486	19671	21072.9	1
1153	P36009	Probable ATP-dependent RNA helicase DHR2	Peak Found	High	Peak Found	Peak Found	High	0.006	2.655	2	1	1	1	735	82.7	8.9	2.39	1	0	1.423	0.99599	28.18	117.5	82.5	22.81	30.86	9435.56	21719.6	9120.18	3181.59	1
1178	P89886	Translation machinery-associated protein 20	Peak Found	High	Peak Found	Peak Found	High	0.004	2.785	5	1	1	1	181	20.3	7.03	2	1	0	1.382	0.99599	54.67	116	84	61.84	38.15	14002.8	59463.5	19987.6	6249.01	1
1188	P25847	DNA mismatch repair protein MSH2	High	High	High	Peak Found	High	0.001	3.282	1	1	3	1	964	108.8	6.1	7.06	1	0	1.364	0.99599	50.08	115.4	84.6	10.34	48.31	49554.3	95380.4	25635.9	28397	1
1189	Q02159	Ubiquitin-conjugating enzyme E2 7	Peak Found	Peak Found	High	Peak Found	Medium	0.026	1.908	7	1	1	1	165	18.5	5.17	1.68	1	0	1.364	0.99599	43.1	115.4	84.6	44.3	52.75	119199	103635	39985.5	47598.7	1
1199	P15873	Proliferating cell nuclear antigen	High	Peak Found	Peak Found	Peak Found	High	0.004	2.8	5	1	1	1	258	28.9	4.59	1.87	1	0	1.34	0.99599	18.74	114.5	85.5	18.15	3.31	55890.4	71780.9	33536.3	19104.4	1
1202	P19262	Dihydrolipoyllysine-residue succinyltransferase component of 2-oxoglutarate dehydrogenase complex, mitochondrial	High	High	High	High	High	0	14.066	10	4	9	4	463	50.4	8.85	14.51	4	0	1.411	0.99599	38.76	114.3	85.7	0.28	41.25	216023	360584	112472	111507	1
1184	Q05498	rRNA-processing protein FCF1	Not Found	High	Peak Found	Peak Found	High	0	3.808	6	1	1	1	189	21.6	9.83	2.34	1	0	1.372	0.996026	49.18	115.7	84.3		44.53		24831.1	7357.53	7675.89	1
908	P08518	DNA-directed RNA polymerase II subunit RPB2	High	High	High	High	High	0	33.251	9	10	22	10	1224	138.7	6.52	45.02	10	0	1.473	0.99687	68.64	130.8	69.2	14.38	42.43	744813	1.5186e+06	299590	302494	1
1061	P39926	Protein SSO2	High	High	High	High	High	0	21.217	20	4	9	4	295	33.7	4.91	25.05	4	0	1.457	0.997137	45.84	123.3	76.7	4.54	35.53	1.30764e+06	2.31827e+06	608218	552526	1
859	P00931	Tryptophan synthase	High	High	High	High	High	0	38.069	21	11	30	11	707	76.6	6.51	57.3	11	0	1.47	0.998549	81.61	133.3	66.7	4.84	37.66	1.93252e+06	3.00004e+06	666519	625410	1
951	P38353	Sec sixty-one protein homolog	High	High	High	High	High	0	26.77	16	7	21	7	490	53.3	8.09	39.65	7	0	1.47	0.998549	127.97	128.4	71.6	18.42	38.32	1.65504e+06	3.57589e+06	745637	706644	1
1051	P54838	Dihydroxyacetone kinase 1	High	High	High	High	High	0	17.44	16	6	12	6	584	62.2	5.41	26.61	6	0	1.424	0.998675	48.38	123.8	76.2	5.92	10.6	340506	615551	189957	120000	1
1590	P38013	Peroxiredoxin AHP1	High	High	Not Found	Peak Found	High	0	6.49	16	2	3	2	176	19.1	5.16	7.84	2	0	1.436	0.998675	0	77.8	122.2	100.7		60771.1	600708		118531	1
913	P27697	Atypical kinase COQ8, mitochondrial	High	High	Peak Found	Peak Found	High	0	9.812	6	3	5	3	501	56.7	9.33	12.19	3	0	1.428	0.999574	21.51	130.5	69.5	0.74	13.37	173768	285874	78460.8	51561.5	1
956	P25294	Protein SIS1	High	High	High	High	High	0	32.625	34	9	19	9	352	37.6	9.03	34.89	9	0	1.463	0.999574	72.59	128	72	17.61	5.94	791293	1.0242e+06	352686	208552	1
1170	P38966	Uncharacterized protein YDR089W	High	High	High	High	High	0	24.821	10	7	17	7	869	98.7	5.5	35.97	7	0	1.466	0.999574	80.03	116.5	83.5	4.81	52.01	714265	1.10938e+06	315282	370830	1
1180	P17423	Homoserine kinase	High	Peak Found	Not Found	Peak Found	Medium	0.029	1.859	2	1	1	1	357	38.7	5.41	0	1	0	1.376	0.999574	23.19	115.8	84.2	21.85		26960.4	32823.6		8536.21	1
1201	P11353	Oxygen-dependent coproporphyrinogen-III oxidase	Peak Found	High	Peak Found	High	High	0	4.85	5	1	2	1	328	37.7	6.8	5.74	1	0	1.338	0.999574	26.29	114.4	85.6	8.79	26.23	27269.8	51348.4	24506	9153.81	1
22	P22023	Killer toxin-resistance protein 5	High	Not Found	Not Found	Not Found	Medium	0.014	2.206	2	1	1	1	1365	156.4	5.17	2.48	1	0												1
23	Q02256	Tyrosine-protein phosphatase YVH1	High	Not Found	Not Found	Not Found	High	0.004	2.866	6	1	1	1	364	41.2	8.05	0	1	0												1
24	Q03834	DNA mismatch repair protein MSH6	High	Not Found	Not Found	Not Found	Medium	0.034	1.77	1	1	1	1	1242	140	5.83	0	1	0												1
25	Q07660	Protein BRE4	High	Not Found	Not Found	Not Found	High	0.001	3.165	1	1	1	1	1125	129.6	8.98	2.21	1	0												1
26	P47139	Uncharacterized protein YJR098C	High	Not Found	Not Found	Not Found	Medium	0.012	2.249	2	1	1	1	656	74.2	7.21	2.6	1	0												1
27	P22470	Protein SAN1	High	Not Found	Not Found	Not Found	Medium	0.018	2.165	3	1	1	1	610	65.6	5.21	0	1	0												1
28	P33313	Hsp70/Hsp90 co-chaperone CNS1	High	Not Found	Not Found	Not Found	Medium	0.032	1.784	3	1	1	1	385	44.1	5.81	0	1	0												1
29	P14922	General transcriptional corepressor CYC8	High	Not Found	Not Found	Not Found	High	0.007	2.42	3	1	1	1	966	107.1	5	3.02	1	0												1
30	O13547	Covalently-linked cell wall protein 14	Not Found	High	High	Not Found	High	0	3.997	10	1	2	1	238	23.3	5.94	2.69	1	0												1
31	P33332	Exocyst complex component SEC3	Not Found	High	Not Found	Not Found	Medium	0.035	1.762	1	1	1	1	1336	154.6	5.45	1.82	1	0												1
32	P36108	DOA4-independent degradation protein 4	Not Found	High	Not Found	Not Found	Medium	0.033	1.778	4	1	1	1	232	26.3	5.33	2.45	1	0												1
33	Q07825	Putative Xaa-Pro aminopeptidase FRA1	Not Found	High	Not Found	Not Found	Medium	0.021	2.087	2	1	1	1	749	84.9	6.86	1.99	1	0												1
34	P39952	Mitochondrial inner membrane protein OXA1	Not Found	High	Not Found	Not Found	Medium	0.034	1.767	5	1	1	1	402	44.8	10.13	2.19	1	0												1
35	P32364	Kinesin-related protein SMY1	Not Found	High	Not Found	Not Found	High	0.001	3.577	2	1	1	1	656	73.8	6.93	2.61	1	0												1
36	Q07541	ER export of PMA1 protein 1	Not Found	High	Not Found	Not Found	Medium	0.013	2.223	19	1	1	1	149	16.9	8.22	3.02	1	0												1
37	Q12372	S-methylmethionine permease 1	Not Found	High	Not Found	Not Found	Medium	0.012	2.252	5	1	1	1	583	64.2	7.91	3.41	1	0												1
38	P53258	GTPase-activating protein GYP2	Not Found	High	Not Found	Not Found	Medium	0.019	2.154	1	1	1	1	950	109.2	5.39	2.3	1	0												1
39	P38851	Membrane-anchored lipid-binding protein LAM1	Not Found	High	Not Found	Not Found	High	0.008	2.401	1	1	1	1	1228	143.5	8.15	0	1	0												1
40	Q04562	Transmembrane 9 superfamily member 2	Not Found	High	Not Found	Not Found	High	0	8.053	4	2	3	1	672	76.3	7.49	8.71	2	0												1
41	P07273	Transcription elongation factor S-II	Not Found	High	Not Found	Not Found	Medium	0.014	2.215	6	1	1	1	309	34.8	8.87	2.13	1	0												1
42	P25382	Ribosome assembly protein 4	Not Found	High	Not Found	Not Found	High	0.003	2.965	3	1	1	1	515	57	8.87	2.91	1	0												1
43	P25555	Serine/arginine (SR)-type shuttling mRNA binding protein GBP2	Not Found	High	Not Found	Not Found	Medium	0.029	1.871	2	1	1	1	427	48.7	6.28	1.82	1	0												1
44	P53121	Putative flavin carrier protein 3	Not Found	High	Not Found	Not Found	Medium	0.026	1.913	3	1	1	1	802	90.7	7.46	0	1	0												1
45	P33327	NAD-specific glutamate dehydrogenase	Not Found	High	Not Found	Not Found	High	0	3.824	1	1	1	1	1092	124.3	5.73	2.47	1	0												1
46	Q06673	Protein ECM30	Not Found	High	Not Found	Not Found	High	0.001	3.135	2	1	1	1	1274	145	7.61	2.07	1	0												1
47	P53832	Cell wall integrity and stress response component 2	Not Found	High	Not Found	Not Found	High	0.006	2.639	3	1	1	1	503	52.3	6.96	2.46	1	0												1
48	Q00764	Alpha,alpha-trehalose-phosphate synthase	Not Found	High	Not Found	Not Found	Medium	0.011	2.321	3	1	1	1	495	56.1	6.09	2.58	1	0												1
49	P53327	RQC trigger complex helicase SLH1	Not Found	High	Not Found	Not Found	Medium	0.032	1.798	1	1	1	1	1967	224.7	6.61	0	1	0												1
50	P33399	La protein homolog	Not Found	High	Not Found	Not Found	Medium	0.031	1.826	6	1	1	1	275	32.1	8.54	2.81	1	0												1
51	Q03212	Protein EAR1	Not Found	High	Not Found	Not Found	Medium	0.025	1.95	2	1	1	1	550	62.5	4.81	2.08	1	0												1
52	P09119	Cell division control protein 6	Not Found	High	Not Found	Not Found	High	0.004	2.748	4	1	1	1	513	58	9.45	2.61	1	0												1
53	P40988	Low-affinity Fe(2+) transport protein	Not Found	High	Not Found	Not Found	Medium	0.026	1.922	3	1	1	1	552	62.8	5.5	0	1	0												1
54	P32902	37S ribosomal protein MRP4, mitochondrial	Not Found	High	Not Found	Not Found	Medium	0.037	1.718	2	1	1	1	394	44.1	8.76	1.92	1	0												1
55	P25639	Uncharacterized membrane protein YCR061W	Not Found	High	Not Found	Not Found	High	0	4.072	4	1	2	1	631	70.9	6.11	5.83	1	0												1
56	Q12373	HAT1-interacting factor 1	Not Found	Not Found	High	Not Found	Medium	0.026	1.913	7	1	1	1	385	43.4	4.75	2.31	1	0												1
57	Q03579	Ceramide synthase subunit LIP1	Not Found	Not Found	High	Not Found	Medium	0.011	2.269	4	1	1	1	150	17.2	6.67	1.93	1	0												1
58	Q12198	Putative cystathionine gamma-synthase YLL058W	Not Found	Not Found	High	Not Found	Medium	0.022	2.053	4	1	1	1	575	64.2	7.03	2.45	1	0												1
59	Q08959	Phosphatidylglycerol phospholipase C	Not Found	Not Found	High	Not Found	Medium	0.018	2.159	5	1	1	1	321	37	8.66	0	1	0												1
285	P25605	Acetolactate synthase small subunit, mitochondrial	High	High	High	High	High	0	4.672	9	2	5	2	309	34	6.52	9.33	2	0				184.1	15.9	16.31	32.18	284560	596470	32594.3	11150.9	1
367	P39107	Mannan polymerase complexes subunit MNN9	High	High	High	Not Found	High	0	10.571	8	3	7	3	395	45.9	6.84	18.62	3	0				168	32	34.44		450152	455243	62500.9		1
983	P38181	Nucleoporin NUP170	High	High	High	Not Found	High	0	5.858	2	2	3	2	1502	169.4	6.13	6.3	2	0				126.7	73.3	11.27		47836.8	93301	28087.4		1
1591	Q07457	E3 ubiquitin-protein ligase BRE1	Not Found	High	Peak Found	High	High	0	5.332	3	2	2	2	700	80.6	6.43	4.62	2	0				77.7	122.3		39.43		41391.7	27561.9	26567.1	1
1673	P28496	Ceramide synthase LAC1	Not Found	High	High	Not Found	High	0	5.573	8	2	2	2	418	49	9.44	4.59	2	0				53.1	146.9				26637.3	41484.2		1

## Sheet: unique to MeOH
COUNT	Accession	Protein Descriptor [OS=Saccharomyces cerevisiae S288C]	Found in 40% MeOH (Run 1)	Found in 40% MeOH (Run 2)	Found in water (Run 1)	Found in water (Run 2)	Protein FDR Confidence: Combined	Exp. q-value: Combined	Sum PEP Score	Coverage [%]	# Peptides	# PSMs	# Unique Peptides	# AAs	MW [kDa]	calc. pI	Score Sequest HT: Sequest HT	# Peptides (by Search Engine): Sequest HT	# Razor Peptides	Abundance Ratio: 40%MeOH/water	Abundance Ratio Adj. P-Value: 40% MeOH/water	Abundance Ratio Variability [%]: 40% MeOH / water	Abundances (Grouped): 40% MeOH	Abundances (Grouped): water	Abundances (Grouped) CV [%]: 40% MeOH	Abundances (Grouped) CV [%]: water	Abundance: Run 1, 40% MeOH	Abundance: Run 2, 40% MeOH	Abundance: Run 1, water	Abundance: Run 2, water	# Protein Groups	Modifications
1	P22023	Killer toxin-resistance protein 5	High	Not Found	Not Found	Not Found	Medium	0.014	2.206	2	1	1	1	1365	156.4	5.17	2.48	1	0												1
2	Q02256	Tyrosine-protein phosphatase YVH1	High	Not Found	Not Found	Not Found	High	0.004	2.866	6	1	1	1	364	41.2	8.05	0	1	0												1
3	Q03834	DNA mismatch repair protein MSH6	High	Not Found	Not Found	Not Found	Medium	0.034	1.77	1	1	1	1	1242	140	5.83	0	1	0												1
4	Q07660	Protein BRE4	High	Not Found	Not Found	Not Found	High	0.001	3.165	1	1	1	1	1125	129.6	8.98	2.21	1	0												1
5	P47139	Uncharacterized protein YJR098C	High	Not Found	Not Found	Not Found	Medium	0.012	2.249	2	1	1	1	656	74.2	7.21	2.6	1	0												1
6	P22470	Protein SAN1	High	Not Found	Not Found	Not Found	Medium	0.018	2.165	3	1	1	1	610	65.6	5.21	0	1	0												1
7	P33313	Hsp70/Hsp90 co-chaperone CNS1	High	Not Found	Not Found	Not Found	Medium	0.032	1.784	3	1	1	1	385	44.1	5.81	0	1	0												1
8	P14922	General transcriptional corepressor CYC8	High	Not Found	Not Found	Not Found	High	0.007	2.42	3	1	1	1	966	107.1	5	3.02	1	0												1
9	P33332	Exocyst complex component SEC3	Not Found	High	Not Found	Not Found	Medium	0.035	1.762	1	1	1	1	1336	154.6	5.45	1.82	1	0												1
10	P36108	DOA4-independent degradation protein 4	Not Found	High	Not Found	Not Found	Medium	0.033	1.778	4	1	1	1	232	26.3	5.33	2.45	1	0												1
11	Q07825	Putative Xaa-Pro aminopeptidase FRA1	Not Found	High	Not Found	Not Found	Medium	0.021	2.087	2	1	1	1	749	84.9	6.86	1.99	1	0												1
12	P39952	Mitochondrial inner membrane protein OXA1	Not Found	High	Not Found	Not Found	Medium	0.034	1.767	5	1	1	1	402	44.8	10.13	2.19	1	0												1
13	P32364	Kinesin-related protein SMY1	Not Found	High	Not Found	Not Found	High	0.001	3.577	2	1	1	1	656	73.8	6.93	2.61	1	0												1
14	Q07541	ER export of PMA1 protein 1	Not Found	High	Not Found	Not Found	Medium	0.013	2.223	19	1	1	1	149	16.9	8.22	3.02	1	0												1
15	Q12372	S-methylmethionine permease 1	Not Found	High	Not Found	Not Found	Medium	0.012	2.252	5	1	1	1	583	64.2	7.91	3.41	1	0												1
16	P53258	GTPase-activating protein GYP2	Not Found	High	Not Found	Not Found	Medium	0.019	2.154	1	1	1	1	950	109.2	5.39	2.3	1	0												1
17	P38851	Membrane-anchored lipid-binding protein LAM1	Not Found	High	Not Found	Not Found	High	0.008	2.401	1	1	1	1	1228	143.5	8.15	0	1	0												1
18	Q04562	Transmembrane 9 superfamily member 2	Not Found	High	Not Found	Not Found	High	0	8.053	4	2	3	1	672	76.3	7.49	8.71	2	0												1
19	P07273	Transcription elongation factor S-II	Not Found	High	Not Found	Not Found	Medium	0.014	2.215	6	1	1	1	309	34.8	8.87	2.13	1	0												1
20	P25382	Ribosome assembly protein 4	Not Found	High	Not Found	Not Found	High	0.003	2.965	3	1	1	1	515	57	8.87	2.91	1	0												1
21	P25555	Serine/arginine (SR)-type shuttling mRNA binding protein GBP2	Not Found	High	Not Found	Not Found	Medium	0.029	1.871	2	1	1	1	427	48.7	6.28	1.82	1	0												1
22	P53121	Putative flavin carrier protein 3	Not Found	High	Not Found	Not Found	Medium	0.026	1.913	3	1	1	1	802	90.7	7.46	0	1	0												1
23	P33327	NAD-specific glutamate dehydrogenase	Not Found	High	Not Found	Not Found	High	0	3.824	1	1	1	1	1092	124.3	5.73	2.47	1	0												1
24	Q06673	Protein ECM30	Not Found	High	Not Found	Not Found	High	0.001	3.135	2	1	1	1	1274	145	7.61	2.07	1	0												1
25	P53832	Cell wall integrity and stress response component 2	Not Found	High	Not Found	Not Found	High	0.006	2.639	3	1	1	1	503	52.3	6.96	2.46	1	0												1
26	Q00764	Alpha,alpha-trehalose-phosphate synthase	Not Found	High	Not Found	Not Found	Medium	0.011	2.321	3	1	1	1	495	56.1	6.09	2.58	1	0												1
27	P53327	RQC trigger complex helicase SLH1	Not Found	High	Not Found	Not Found	Medium	0.032	1.798	1	1	1	1	1967	224.7	6.61	0	1	0												1
28	P33399	La protein homolog	Not Found	High	Not Found	Not Found	Medium	0.031	1.826	6	1	1	1	275	32.1	8.54	2.81	1	0												1
29	Q03212	Protein EAR1	Not Found	High	Not Found	Not Found	Medium	0.025	1.95	2	1	1	1	550	62.5	4.81	2.08	1	0												1
30	P09119	Cell division control protein 6	Not Found	High	Not Found	Not Found	High	0.004	2.748	4	1	1	1	513	58	9.45	2.61	1	0												1
31	P40988	Low-affinity Fe(2+) transport protein	Not Found	High	Not Found	Not Found	Medium	0.026	1.922	3	1	1	1	552	62.8	5.5	0	1	0												1
32	P32902	37S ribosomal protein MRP4, mitochondrial	Not Found	High	Not Found	Not Found	Medium	0.037	1.718	2	1	1	1	394	44.1	8.76	1.92	1	0												1
33	P25639	Uncharacterized membrane protein YCR061W	Not Found	High	Not Found	Not Found	High	0	4.072	4	1	2	1	631	70.9	6.11	5.83	1	0												1
34	P32839	Mitochondrial chaperone BCS1	High	High	Not Found	Not Found	High	0	4.005	3	1	2	1	456	51.1	8.78	4.32	1	0	100	8.02532e-17		200		1.29		57064.6	93150.3			1
35	Q12690	60S ribosomal protein L13-A	High	High	Not Found	Not Found	High	0	51.373	45	9	81	1	199	22.5	11.18	201.63	9	0	100	8.02532e-17		200		70.02		1.37298e+06	770809			1
36	Q06142	Importin subunit beta-1	High	High	Not Found	Not Found	Medium	0.014	2.208	1	1	2	1	861	94.7	4.64	4.4	1	0	100	8.02532e-17		200					95915.8			1
37	P38992	Sphingolipid C4-hydroxylase SUR2	High	High	Not Found	Not Found	High	0.004	2.827	3	1	2	1	349	40.7	8.41	3.98	1	0	100	8.02532e-17		200		34.73		60767.2	166797			1
38	Q12220	U3 small nucleolar RNA-associated protein 12	High	High	Not Found	Not Found	High	0	7.118	3	2	3	2	943	106.3	6.02	5.62	2	0	100	8.02532e-17		200		3.6		82037	129622			1
39	Q05031	Mannan endo-1,6-alpha-mannosidase DFG5	High	High	Not Found	Not Found	High	0	8.276	3	1	5	1	458	50.5	4.75	6.65	1	0	100	8.02532e-17		200		0.03		63440.9	105432			1
40	P24004	Peroxisomal ATPase PEX1	High	High	Not Found	Not Found	High	0.006	2.631	1	1	2	1	1043	117.2	6.95	4.48	1	0	100	8.02532e-17		200		6.08		39054.5	59580.5			1
41	P32454	Aminopeptidase 2, mitochondrial	High	High	Not Found	Not Found	Medium	0.011	2.307	2	1	2	1	952	107.7	8.03	0	1	0	100	8.02532e-17		200		38.73		20468.4	19397.5			1
42	Q03691	Protein ROT1	High	High	Not Found	Not Found	High	0	10.013	7	1	3	1	256	28.9	5.64	8.4	1	0	100	8.02532e-17		200		21.58		85464.5	193265			1
43	P36517	54S ribosomal protein L4, mitochondrial	High	High	Not Found	Not Found	Medium	0.011	2.258	6	1	2	1	319	36.9	7.65	5.75	1	0	100	8.02532e-17		200		5.88		28752.7	43988.1			1
44	P15367	Signal peptidase complex catalytic subunit SEC11	High	High	Not Found	Not Found	High	0	8.147	10	2	3	2	167	18.8	9.16	7.94	2	0	100	8.02532e-17		200		12.1		146195	288536			1
45	Q01590	Integral membrane protein SED5	High	High	Not Found	Not Found	High	0	5.276	9	2	3	2	340	38.8	6.98	7.67	2	0	100	8.02532e-17		200		1.61		29425.6	47819.4			1
46	P38770	Nucleus export protein BRL1	High	High	Not Found	Not Found	High	0.001	3.599	2	1	2	1	471	53.4	4.86	4.54	1	0	100	8.02532e-17		200		7.41		42424.5	63505.2			1
47	Q12429	Diphthine--ammonia ligase	High	High	Not Found	Not Found	High	0.01	2.326	3	1	2	1	685	77.9	5.88	2.56	1	0	100	8.02532e-17		200		1.92		20908.3	33829.5			1
48	P20434	DNA-directed RNA polymerases I, II, and III subunit RPABC1	High	High	Not Found	Not Found	High	0.001	3.704	5	1	3	1	215	25.1	9.1	6.54	1	0	100	8.02532e-17		200		8.84		50928.8	95959.2			1
49	Q08096	RNA 3'-terminal phosphate cyclase-like protein	High	High	Not Found	Not Found	High	0.001	3.454	3	1	2	1	367	40.1	8.84	4.66	1	0	100	8.02532e-17		200		9.72		41589.5	60253.8			1
50	P52593	Nucleoporin NUP188	High	High	Not Found	Not Found	Medium	0.011	2.299	1	1	2	1	1655	188.5	5.6	1.85	1	0	100	8.02532e-17		200		3.15		28252.9	44921.6			1
51	P40070	U6 snRNA-associated Sm-like protein LSm4	High	High	Not Found	Not Found	High	0.001	3.436	6	1	2	1	187	21.3	9.45	4.36	1	0	100	8.02532e-17		200		21.95		38538.6	46852.3			1
52	Q6Q560	Protein ISD11	High	High	Not Found	Not Found	Medium	0.019	2.145	10	1	2	1	94	11.3	10.33	4.46	1	0	100	8.02532e-17		200		7.45		100246	185190			1
53	P38713	Oxysterol-binding protein homolog 3	High	High	Not Found	Not Found	High	0	5.635	4	2	3	2	996	113.7	8.57	8.12	2	0	100	8.02532e-17		200		18.6		40648.7	51867.3			1
54	P53254	U3 small nucleolar RNA-associated protein 22	High	High	Not Found	Not Found	High	0	3.777	2	2	3	2	1237	140.4	8.46	5.09	2	0	100	8.02532e-17		200		21.56		53484.4	65393.9			1
55	Q06678	54S ribosomal protein L35, mitochondrial	High	High	Not Found	Not Found	High	0	4.325	7	2	2	2	367	42.8	9.51	5.07	2	0	100	8.02532e-17		200		2.67		44711.2	77195.8			1
56	P48445	Biotin--protein ligase	High	High	Not Found	Not Found	High	0.001	3.509	2	1	2	1	690	76.3	6.92	4.85	1	0	100	8.02532e-17		200				17308.4				1
57	Q12511	Pyruvate dehydrogenase (acetyl-transferring)-phosphatase 1, mitochondrial	High	High	Not Found	Not Found	High	0	5.145	6	2	3	2	572	63.6	8.62	7.31	2	0	100	8.02532e-17		200		5.24		54237.1	97115.9			1
58	P00431	Cytochrome c peroxidase, mitochondrial	High	High	Not Found	Not Found	High	0.001	3.465	10	2	2	2	361	40.3	6.38	0	2	0	100	8.02532e-17		200		38.08		7174.11	20716.4			1
59	Q05881	Uncharacterized protein YLR287C	High	High	Not Found	Not Found	High	0	5.139	4	1	2	1	355	40.9	5.07	2.56	1	0	100	8.02532e-17		200				48319.1				1
60	Q02046	Methylenetetrahydrofolate dehydrogenase	High	High	Not Found	Not Found	High	0	8.976	9	2	3	2	320	36.2	6.99	9.12	2	0	100	8.02532e-17		200		2.04		48563.2	78438.7			1
61	P39006	Phosphatidylserine decarboxylase proenzyme 1, mitochondrial	High	High	Not Found	Not Found	High	0	7.69	7	3	3	3	500	56.6	9.1	6.2	3	0	100	8.02532e-17		200		14.55		102251	138290			1
62	P40502	Altered inheritance of mitochondria protein 19, mitochondrial	High	High	Not Found	Not Found	High	0	4.612	15	1	2	1	157	16.9	9.99	7.06	1	0	100	8.02532e-17		200		30.23		76976.9	82902.4			1
63	Q12221	mRNA-binding protein PUF2	High	High	Not Found	Not Found	Medium	0.021	2.071	1	1	2	1	1075	119.4	8.78	4.81	1	0	100	8.02532e-17		200				118583				1
64	P25374	Cysteine desulfurase, mitochondrial	High	High	Not Found	Not Found	High	0	5.817	3	1	2	1	497	54.4	8.19	5.42	1	0	100	8.02532e-17		200		20.93		29741.5	66627.8			1
65	P39990	13 kDa ribonucleoprotein-associated protein	High	High	Not Found	Not Found	High	0.008	2.401	8	1	2	1	126	13.6	7.85	4.75	1	0	100	8.02532e-17		200		112.95		241064	44857.2			1
66	P38084	Leu/Val/Ile amino-acid permease	High	High	Not Found	Not Found	High	0.001	3.517	2	1	2	1	609	67.7	8.24	4.71	1	0	100	8.02532e-17		200		4.92		50238.8	89549			1
67	P26755	Replication factor A protein 3	High	High	Not Found	Not Found	High	0	4.457	12	1	2	1	122	13.8	4.79	5.42	1	0	100	8.02532e-17		200		35.45		19914	55258.6			1
68	Q02486	ARS-binding factor 2, mitochondrial	High	High	Not Found	Not Found	High	0.002	3.025	5	1	2	1	183	21.5	9.69	5.35	1	0	100	8.02532e-17		200		33.55		60058.2	161953			1
69	Q03218	Mitochondrial metal transporter 1	High	High	Not Found	Not Found	High	0	6.323	6	2	3	2	510	56.2	7.09	7.64	2	0	100	8.02532e-17		200		45.06		35327.6	113657			1
70	P32842	V-type proton ATPase subunit c'	High	High	Not Found	Not Found	High	0	5.082	11	1	2	1	164	17	7.72	6.46	1	0	100	8.02532e-17		200		57.77		97477.5	68062.7			1
71	Q3E824	Uncharacterized protein YOR020W-A	High	High	Not Found	Not Found	High	0.007	2.48	12	1	2	1	90	9.6	8.38	4.58	1	0	100	8.02532e-17		200		47.11		56041.1	46611.4			1
72	P40215	External NADH-ubiquinone oxidoreductase 1, mitochondrial	High	High	Not Found	Not Found	High	0.001	3.311	2	1	2	1	560	62.7	9.28	4.07	1	0	100	8.02532e-17		200		6.12		41939.8	63942.6			1
73	P40467	Activator of stress genes 1	High	High	Not Found	Not Found	High	0.003	2.927	2	1	2	1	964	108.7	6.16	3.77	1	0	100	8.02532e-17		200		30.32		36404.4	93563.7			1
74	Q06170	Uncharacterized membrane protein YLR326W	High	High	Not Found	Not Found	High	0.007	2.478	7	1	2	1	240	27.4	9.36	2	1	0	100	8.02532e-17		200		30.68		5083.54	13134.5			1
75	Q03161	Glucose-6-phosphate 1-epimerase	High	High	Not Found	Not Found	High	0	9.006	18	4	4	4	297	33.9	6.13	9.22	4	0	100	8.02532e-17		200		3.76		213355	336330			1
76	Q06107	Uncharacterized TLC domain-containing protein YPR114W	High	High	Not Found	Not Found	High	0	6.113	8	2	6	2	315	36.7	9.22	15.99	2	0	100	8.02532e-17		200		17.7		293393	379257			1	Acetyl [N-Term]
77	P0CH09	Ubiquitin-60S ribosomal protein L40	High	High	Not Found	Not Found	High	0	17.246	31	4	16	1	128	14.5	9.83	24.24	4	0	100	8.02532e-17		200		7.48		44789.2	66979.4			1
78	P23900	Glycerol uptake/efflux facilitator protein	High	High	Not Found	Not Found	High	0	5.529	5	2	3	2	669	73.8	6.9	2.86	2	0	100	8.02532e-17		200		52.17		38127.4	137503			1
79	Q04201	CUE domain-containing protein CUE4	High	High	Not Found	Not Found	High	0	7.885	24	1	3	1	117	12.9	7.52	10.09	1	0	100	8.02532e-17		200		66.22		331808	199786			1
80	P38063	Ribose-phosphate pyrophosphokinase 4	High	High	Not Found	Not Found	High	0	11.069	18	3	4	2	326	35.7	6.39	13.19	3	0	100	8.02532e-17		200		10.59		31903.3	45647.9			1
81	P36062	Vacuolar amino acid transporter 3	High	High	Not Found	Not Found	High	0	6.184	2	1	2	1	692	75.4	8.53	4.47	1	0	100	8.02532e-17		200		27.76		23519.3	58203			1
82	P40016	26S proteasome regulatory subunit RPN3	High	High	Not Found	Not Found	High	0	4.816	3	1	2	1	523	60.4	5.6	4.64	1	0	100	8.02532e-17		200		8.57		28861.2	42499			1
83	Q12109	Tryptophan--tRNA ligase, cytoplasmic	High	High	Not Found	Not Found	High	0	5.186	4	1	2	1	432	49.3	6.81	5.66	1	0	100	8.02532e-17		200		12.28		24248	47980.6			1
84	P38166	Protein transport protein SFT2	High	High	Not Found	Not Found	High	0	6.606	12	2	3	2	215	24.3	8.84	8.68	2	0	100	8.02532e-17		200		14.88		320392	431240			1
85	P53283	Polyamine transporter 2	High	High	Not Found	Not Found	High	0.001	3.535	4	1	2	1	614	67.5	7.01	2.91	1	0	100	8.02532e-17		200		45.12		52984.5	45472.1			1
86	P36150	Uroporphyrinogen-III C-methyltransferase	High	High	Not Found	Not Found	Medium	0.031	1.834	2	1	2	1	593	66.1	6.57	2.37	1	0	100	8.02532e-17		200		6.95		48011.3	72343.4			1
87	Q05521	Diacylglycerol pyrophosphate phosphatase 1	High	High	Not Found	Not Found	High	0.001	3.502	6	1	2	1	289	33.5	6.44	4.52	1	0	100	8.02532e-17		200		14.71		85333.8	115142			1
88	Q06705	Phosphatidylinositol transfer protein CSR1	High	High	Not Found	Not Found	Medium	0.032	1.807	2	1	2	1	408	47.4	6.62	3.67	1	0	100	8.02532e-17		200		19.64		31732.1	69776.2			1
89	P53895	Protein ASI2	High	High	Not Found	Not Found	High	0.002	3.013	5	1	2	1	289	33	9.52	4.8	1	0	100	8.02532e-17		200		15.7		34583.4	46002.7			1
90	P23724	Proteasome subunit beta type-6	High	High	Not Found	Not Found	High	0	5.426	10	2	4	2	241	26.9	6.07	9.19	2	0	100	8.02532e-17		200		5.46		106675	191593			1
91	Q06205	FK506-binding protein 4	High	High	Not Found	Not Found	Medium	0.021	2.096	3	1	2	1	392	43.9	4.69	1.93	1	0	100	8.02532e-17		200		14.93		45936	61782.1			1
92	P25626	54S ribosomal protein IMG1, mitochondrial	High	High	Not Found	Not Found	High	0	5.995	13	2	3	2	169	19.4	10.39	7.28	2	0	100	8.02532e-17		200		18.52		45927.3	99365.4			1
93	P00128	Cytochrome b-c1 complex subunit 7, mitochondrial	High	High	Not Found	Not Found	High	0	7.906	26	2	3	2	127	14.6	5.88	10.11	2	0	100	8.02532e-17		200		4.61		143680	223785			1
94	Q03713	Respiratory supercomplex factor 1, mitochondrial	High	High	Not Found	Not Found	High	0	6.396	13	2	3	2	159	18.5	9.1	6.64	2	0	100	8.02532e-17		200		10.28		121861	234373			1
95	Q07872	Epsin-4	High	High	Not Found	Not Found	High	0.001	3.092	6	1	2	1	247	28.3	9.36	5.31	1	0	100	8.02532e-17		200		37.25		46704.9	45269.1			1
96	P33401	Phosphoglucomutase 1	High	High	Not Found	Not Found	High	0	6.206	4	2	2	2	570	63.1	7.24	4.64	2	0	100	8.02532e-17		200		27.36		83956.3	206557			1
97	P32899	U3 small nucleolar ribonucleoprotein protein IMP3	High	High	Not Found	Not Found	High	0	4.479	14	2	3	2	183	21.9	9.76	6.38	2	0	100	8.02532e-17		200		7.84		170687	317070			1
98	P39994	Putative 2-hydroxyacyl-CoA lyase	High	High	Not Found	Not Found	High	0	3.802	3	1	2	1	560	61.3	7.66	5.08	1	0	100	8.02532e-17		200		14.18		43740.8	88931.7			1
99	P00424	Cytochrome c oxidase subunit 5A, mitochondrial	High	High	Not Found	Not Found	High	0	11.973	19	2	7	1	153	17.1	9.82	17.09	2	0	100	8.02532e-17		200		10.48		37085.9	71530.2			1
100	Q08023	Protein FMP25, mitochondrial	High	High	Not Found	Not Found	High	0	4.886	4	2	2	2	583	66.6	8.87	5.27	2	0	100	8.02532e-17		200		45.12		148963	479761			1
101	P53734	ATP-dependent RNA helicase DBP6	High	High	Not Found	Not Found	High	0.007	2.429	2	1	2	1	629	70.3	6.25	4.76	1	0	100	8.02532e-17		200					35437			1
102	P53751	Uncharacterized membrane glycoprotein YNR065C	High	High	Not Found	Not Found	High	0	19.104	6	5	8	2	1116	125.1	5.07	21.38	5	0	100	8.02532e-17		200		71.85		59283.7	32153.7			1
103	P32191	Glycerol-3-phosphate dehydrogenase, mitochondrial	High	High	Not Found	Not Found	High	0.001	3.576	2	1	2	1	649	72.3	7.9	4.8	1	0	100	8.02532e-17		200		39.46		85401.9	80038.3			1
104	Q03674	Lysophospholipase 2	High	High	Not Found	Not Found	High	0	6.358	3	2	4	2	706	75.4	4.7	9.94	2	0	100	8.02532e-17		200		15.46		346450	462494			1
105	P48563	Protein MON2	High	High	Not Found	Not Found	High	0	7.076	1	1	2	1	1636	186.7	5.69	3.67	1	0	100	8.02532e-17		200		17.13		28744.3	37464.2			1
106	P38998	Saccharopine dehydrogenase	High	High	Not Found	Not Found	High	0.001	3.054	3	1	2	1	373	41.4	9.1	4.59	1	0	100	8.02532e-17		200		49		52173.9	42100.7			1
107	P32501	Translation initiation factor eIF-2B subunit epsilon	High	High	Not Found	Not Found	High	0.001	3.744	2	1	2	1	712	81.1	4.81	4.15	1	0	100	8.02532e-17		200		29.63		42893.5	46604.7			1
108	Q12066	Nuclear rim protein 1	High	Not Found	Not Found	Not Found	High	0	4.195	4	1	1	1	484	56.9	9.01	3.58	1	0	100	8.02532e-17		200				25057.2				1
109	Q08920	Nuclear cap-binding protein subunit 2	High	Not Found	Not Found	Not Found	Medium	0.026	1.906	4	1	1	1	208	23.8	5.16	0	1	0	100	8.02532e-17		200				40181.9				1
110	P47140	Altered inheritance rate of mitochondria protein 25	High	Not Found	Not Found	Not Found	High	0.01	2.347	6	1	1	1	327	37.5	8.65	2.68	1	0	100	8.02532e-17		200				12935				1
111	P25037	Ubiquitin carboxyl-terminal hydrolase 1	High	Not Found	Not Found	Not Found	High	0	3.79	2	1	2	1	809	92.7	4.89	5.67	1	0	100	8.02532e-17		200				74417.2				1
112	P24279	DNA replication licensing factor MCM3	High	Not Found	Not Found	Not Found	Medium	0.024	2.002	2	1	1	1	971	107.5	5.45	0	1	0	100	8.02532e-17		200				13684.1				1
113	P53894	Serine/threonine-protein kinase CBK1	High	Not Found	Not Found	Not Found	Medium	0.035	1.738	1	1	1	1	756	86.9	7.91	1.61	1	0	100	8.02532e-17		200				46954.5				1
114	Q12207	Non-classical export protein 2	High	Not Found	Not Found	Not Found	High	0.006	2.576	5	1	1	1	173	19	9.39	2.21	1	0	100	8.02532e-17		200				140587				1
115	P38234	Protein RFS1	High	Not Found	Not Found	Not Found	High	0.001	3.229	16	1	1	1	210	22.9	5.29	4.77	1	0	100	8.02532e-17		200				47826.9				1
116	P00360	Glyceraldehyde-3-phosphate dehydrogenase 1	High	Not Found	Not Found	Not Found	High	0	33.325	30	10	33	1	332	35.7	8.28	56.99	10	0	100	8.02532e-17		200				65954.2				1
117	P32473	Pyruvate dehydrogenase E1 component subunit beta, mitochondrial	High	Not Found	Not Found	Not Found	High	0.007	2.446	3	1	1	1	366	40	5.3	2.25	1	0	100	8.02532e-17		200				47580.9				1
118	P47019	Ribosome biogenesis protein ALB1	High	Not Found	Not Found	Not Found	High	0.001	3.737	14	1	1	1	175	19.3	10.02	2.8	1	0	100	8.02532e-17		200				25237.2				1
119	Q03362	Uncharacterized protein YDR476C	High	Peak Found	Not Found	Not Found	High	0.001	3.689	6	1	1	1	224	25.3	6.54	2.47	1	0	100	8.02532e-17		200		29.48		39207.2	42696.5			1
120	P51401	60S ribosomal protein L9-B	High	Peak Found	Not Found	Not Found	High	0	32.197	47	7	83	1	191	21.6	9.66	214.82	7	0	100	8.02532e-17		200		93.9		79781	26787.1			1
121	P0CF36	Putative uncharacterized protein YPL276W	High	Peak Found	Not Found	Not Found	High	0.004	2.882	8	1	1	1	145	15.9	4.94	1.92	1	0	100	8.02532e-17		200		72.42		75590.3	40550.3			1
122	P25515	V-type proton ATPase subunit c	High	Peak Found	Not Found	Not Found	High	0.001	3.503	11	1	1	1	160	16.3	7.99	3.06	1	0	100	8.02532e-17		200		18.02		161996	208450			1
123	P04806	Hexokinase-1	High	Peak Found	Not Found	Not Found	High	0	5.127	6	2	2	1	485	53.7	5.45	2.47	2	0	100	8.02532e-17		200		7.22		10974.2	20208.3			1
124	P30619	Protein transport protein SEC1	High	Peak Found	Not Found	Not Found	Medium	0.038	1.713	2	1	1	1	724	83.4	7.3	2.52	1	0	100	8.02532e-17		200		49.41		29824.4	23909.4			1
125	P38330	RNA-binding protein RMD9-like, mitochondrial	High	Peak Found	Not Found	Not Found	High	0	6.36	4	2	2	2	731	83.7	7.52	4.53	2	0	100	8.02532e-17		200		44.57		55674.5	48196.7			1
126	P35206	Mannosyl phosphorylinositol ceramide synthase regulatory protein CSG2	High	Peak Found	Not Found	Not Found	High	0.003	2.921	7	1	2	1	410	45.4	7.28	4.97	1	0	100	8.02532e-17		200		58.95		57912.7	39626			1
127	Q02455	Protein MLP1	High	Peak Found	Not Found	Not Found	Medium	0.025	1.953	1	1	1	1	1875	218.3	5.2	2.18	1	0	100	8.02532e-17		200		55.09		14713.3	55679.4			1
128	P24482	DNA polymerase epsilon subunit B	High	Peak Found	Not Found	Not Found	High	0.006	2.695	1	1	1	1	689	78.3	6.19	1.96	1	0	100	8.02532e-17		200		8.93		34074.2	49919.1			1
129	P38329	Vacuolar cation-chloride cotransporter 1	High	Peak Found	Not Found	Not Found	High	0.001	3.217	1	1	1	1	1120	123.9	8.54	1.92	1	0	100	8.02532e-17		200		38.29		29973.8	28595.7			1
130	P39965	Probable proline--tRNA ligase, mitochondrial	High	Peak Found	Not Found	Not Found	Medium	0.014	2.188	3	1	1	1	576	65.8	7.42	0	1	0	100	8.02532e-17		200		6.04		6894.49	10523.8			1
131	Q99315	Transposon Ty3-G Gag-Pol polyprotein	High	Peak Found	Not Found	Not Found	Medium	0.022	2.032	1	1	1	1	1547	178.2	8.82	2.17	1	0	100	8.02532e-17		200		50.7		9175.04	7202.82			1
132	P32381	Actin-related protein 2	High	Peak Found	Not Found	Not Found	High	0.001	3.56	4	1	1	1	391	44	5.78	2.62	1	0	100	8.02532e-17		200		17.28		43540.8	56625.7			1
133	P32451	Biotin synthase, mitochondrial	High	Peak Found	Not Found	Not Found	High	0.01	2.371	4	1	1	1	375	41.9	8.5	0	1	0	100	8.02532e-17		200		3.59		27592.2	43601.8			1
134	P53946	Actin-related protein 5	High	Peak Found	Not Found	Not Found	Medium	0.035	1.76	2	1	1	1	755	87.5	5.47	2.07	1	0	100	8.02532e-17		200		27.51		23968.7	26871.7			1
135	Q06091	Pre-mRNA-splicing factor SNT309	High	Peak Found	Not Found	Not Found	Medium	0.012	2.25	5	1	3	1	175	20.7	8.51	5.95	1	0	100	8.02532e-17		200		4.69		389167	605476			1
136	P05747	60S ribosomal protein L29	High	Peak Found	Not Found	Not Found	Medium	0.019	2.13	15	1	1	1	59	6.7	11.31	1.81	1	0	100	8.02532e-17		200		22.88		67388.2	80835.9			1
137	Q03723	Dolichyl-diphosphooligosaccharide--protein glycosyltransferase subunit OST6	High	Peak Found	Not Found	Not Found	High	0.004	2.744	5	1	1	1	332	37.9	8.44	2.89	1	0	100	8.02532e-17		200		63.38		43328.9	27448.9			1
138	P25373	Glutaredoxin-1	High	Peak Found	Not Found	Not Found	Medium	0.022	2.013	14	1	1	1	110	12.4	5.06	3.16	1	0	100	8.02532e-17		200		28.91		79844.3	87680.1			1
139	P38254	Probable tubulin--tyrosine ligase PBY1	High	Peak Found	Not Found	Not Found	High	0.007	2.478	2	1	1	1	753	86.3	4.94	2.31	1	0	100	8.02532e-17		200		20.84		22611.2	50587.7			1
140	P32341	Vacuolar ATPase assembly integral membrane protein VPH2	High	Peak Found	Not Found	Not Found	High	0.001	3.081	7	1	1	1	215	25.3	9.03	2.62	1	0	100	8.02532e-17		200		58.76		35545.6	24401.7			1
141	P57744	Mitochondrial import inner membrane translocase subunit TIM8	High	Peak Found	Not Found	Not Found	High	0.004	2.769	14	1	1	1	87	9.8	5.38	2.86	1	0	100	8.02532e-17		200		3		42247.1	73278.4			1
142	P48559	GTP-binding protein YPT11	High	Peak Found	Not Found	Not Found	Medium	0.011	2.277	4	1	1	1	417	47.1	6.8	1.96	1	0	100	8.02532e-17		200		22.94		19951.5	23909.7			1
143	P17076	60S ribosomal protein L8-A	High	Peak Found	Not Found	Not Found	High	0	82.093	50	18	158	1	256	28.1	10.04	366.75	18	0	100	8.02532e-17		200		16.04		522880	1091747			1
144	P38072	Protein SCO2, mitochondrial	High	Peak Found	Not Found	Not Found	High	0.001	3.04	5	1	1	1	301	34.9	8.12	3.05	1	0	100	8.02532e-17		200		2.21		54886	94151.5			1
145	P27472	Glycogen	High	Peak Found	Not Found	Not Found	High	0	4.106	3	2	5	1	705	80	6.35	8.51	2	0	100	8.02532e-17		200		22.74		118757	142733			1
146	Q12200	NPC intracellular sterol transporter 1-related protein 1	High	Peak Found	Not Found	Not Found	High	0.001	3.116	1	1	1	1	1170	132.6	5.2	2.81	1	0	100	8.02532e-17		200		6.34		25613.5	38929.8			1
147	Q12192	Repression factor of MSEs protein 1	High	Peak Found	Not Found	Not Found	Medium	0.023	1.988	3	1	1	1	310	35.2	9.06	1.74	1	0	100	8.02532e-17		200		4.51		104258	184761			1
148	P36066	Protein MRG3-like	High	Peak Found	Not Found	Not Found	Medium	0.023	1.984	4	1	1	1	463	54.5	9.06	2.48	1	0	100	8.02532e-17		200		19.86		28338.2	35508.5			1
149	Q02724	Ubiquitin-like-specific protease 1	High	Peak Found	Not Found	Not Found	High	0	4.119	3	2	2	2	621	72.3	9.47	2	2	0	100	8.02532e-17		200		20.09		31441.1	69577.5			1
150	P23250	Negative RAS protein regulator protein	Not Found	High	Not Found	Not Found	Medium	0.011	2.304	3	1	1	1	407	46.6	9.09	2.29	1	0	100	8.02532e-17		200					120302			1
151	P39718	Peroxisome assembly protein 22	Not Found	High	Not Found	Not Found	High	0	6.53	11	1	1	1	180	19.9	8.31	3.11	1	0	100	8.02532e-17		200					50499.6			1
152	P38271	Protein OPY1	Not Found	High	Not Found	Not Found	Medium	0.035	1.73	2	1	1	1	328	37.7	8.12	0	1	0	100	8.02532e-17		200					8615.44			1
153	P33303	Succinate/fumarate mitochondrial transporter	Not Found	High	Not Found	Not Found	High	0.002	3.007	5	1	1	1	322	35.3	9.76	2.87	1	0	100	8.02532e-17		200					19426.5			1
154	P28272	Dihydroorotate dehydrogenase (fumarate)	Not Found	High	Not Found	Not Found	Medium	0.019	2.141	6	1	1	1	314	34.8	6.05	2.45	1	0	100	8.02532e-17		200					20188.8			1
155	Q08773	ISWI chromatin-remodeling complex ATPase ISW2	Not Found	High	Not Found	Not Found	High	0.003	2.973	1	1	1	1	1120	130.2	6.64	2.49	1	0	100	8.02532e-17		200					42373.5			1
156	P35169	Serine/threonine-protein kinase TOR1	Not Found	High	Not Found	Not Found	Medium	0.011	2.28	1	1	1	1	2470	281	7.23	2.93	1	0	100	8.02532e-17		200					10659.2			1
157	P53178	UDP-N-acetylglucosamine transferase subunit ALG13	Not Found	High	Not Found	Not Found	Medium	0.019	2.13	8	1	1	1	202	22.6	5.86	2.21	1	0	100	8.02532e-17		200					84278.8			1
158	P39081	Protein PCF11	Peak Found	High	Not Found	Not Found	Medium	0.032	1.789	2	1	1	1	626	71.9	7.83	0	1	0	100	8.02532e-17		200		0.58		28311.5	46685.8			1
159	P17119	Kinesin-like protein KAR3	Peak Found	High	Not Found	Not Found	High	0.006	2.614	1	1	1	1	729	84	8.75	2.81	1	0	100	8.02532e-17		200		23.29		43944.8	52401.8			1
160	P53256	Exosome complex component RRP46	Peak Found	High	Not Found	Not Found	Medium	0.038	1.714	4	1	1	1	223	24.4	4.86	1.89	1	0	100	8.02532e-17		200		34.78		26030.8	71501.9			1
161	P53173	ER-derived vesicles protein ERV14	Peak Found	High	Not Found	Not Found	High	0.001	3.167	8	1	1	1	138	15.9	6.92	1.94	1	0	100	8.02532e-17		200		47.82		106726	358719			1
162	P53947	Vacuolar membrane protein YNL058C	Peak Found	High	Not Found	Not Found	High	0.007	2.478	5	1	1	1	316	35	7.21	2.99	1	0	100	8.02532e-17		200		74.09		10407.5	55385.9			1
163	P53324	Steryl acetyl hydrolase 1	Peak Found	High	Not Found	Not Found	High	0.01	2.356	4	1	1	1	424	48.5	7.49	0	1	0	100	8.02532e-17		200		55.27		20802.2	15148.8			1
164	P28737	Outer mitochondrial transmembrane helix translocase	Peak Found	High	Not Found	Not Found	High	0.004	2.887	3	1	2	1	362	40.3	5.72	4.5	1	0	100	8.02532e-17		200		11.57		68053.2	133306			1
165	P38920	DNA mismatch repair protein MLH1	Peak Found	High	Not Found	Not Found	High	0.01	2.356	2	1	1	1	769	87	6.96	2.12	1	0	100	8.02532e-17		200		33.64		50333.6	51517.3			1
166	P53388	Dicarboxylic amino acid permease	Peak Found	High	Not Found	Not Found	High	0.001	3.7	2	1	1	1	608	68.1	8.91	2.84	1	0	100	8.02532e-17		200		2.72		29613.2	47375.7			1
167	Q6Q547	H/ACA ribonucleoprotein complex subunit NOP10	Peak Found	High	Not Found	Not Found	High	0.001	3.604	17	1	1	1	58	6.6	10.17	2.66	1	0	100	8.02532e-17		200		46.45		40820.5	34307.6			1
168	Q03976	37S ribosomal protein S24, mitochondrial	Peak Found	High	Not Found	Not Found	High	0.001	3.221	5	1	1	1	319	37.4	9.23	1.81	1	0	100	8.02532e-17		200		37.39		8408.12	24027.2			1
169	P05373	Delta-aminolevulinic acid dehydratase	Peak Found	High	Not Found	Not Found	Medium	0.014	2.207	4	1	1	1	342	37.7	6.14	2.17	1	0	100	8.02532e-17		200		9.83		8806.62	16827.9			1
170	P32491	MAP kinase kinase MKK2/SSP33	Peak Found	High	Not Found	Not Found	High	0.007	2.42	2	1	1	1	506	56.7	8.68	2.41	1	0	100	8.02532e-17		200		17.85		17431.6	37355.2			1
171	P32769	Elongation factor 1 alpha-like protein	Peak Found	High	Not Found	Not Found	High	0.01	2.328	1	1	1	1	611	68.7	5.36	1.93	1	0	100	8.02532e-17		200		59.21		5611.9	22770.2			1
172	P41735	5-demethoxyubiquinone hydroxylase, mitochondrial	Peak Found	High	Not Found	Not Found	High	0.007	2.43	4	1	1	1	233	26	7.99	2.7	1	0	100	8.02532e-17		200		6.75		37905.6	57277.4			1
173	P08004	Chitin synthase 1	Peak Found	High	Not Found	Not Found	High	0.004	2.809	1	1	1	1	1131	129.8	6.23	2.31	1	0	100	8.02532e-17		200		21.9		19525.1	44358.5			1
174	Q03649	Monoacylglycerol lipase	Peak Found	High	Not Found	Not Found	High	0	4.981	5	1	1	1	449	51.4	8.4	3.67	1	0	100	8.02532e-17		200		7.5		13486.1	24931.7			1
175	P36036	RNA annealing protein YRA2	Peak Found	High	Not Found	Not Found	High	0.007	2.462	5	1	1	1	203	23.8	9.39	2.12	1	0	100	8.02532e-17		200		34.78		115764	116480			1
176	P21306	ATP synthase subunit epsilon, mitochondrial	Peak Found	High	Not Found	Not Found	High	0	4.632	35	2	2	2	62	6.7	9.77	3.88	2	0	100	8.02532e-17		200		15.17		54086.1	111526			1
177	P38821	Aspartyl aminopeptidase 4	Peak Found	High	Not Found	Not Found	Medium	0.021	2.076	3	1	1	1	490	54.1	7.02	2.69	1	0	100	8.02532e-17		200		29.66		17012.8	43295			1
178	P20967	2-oxoglutarate dehydrogenase, mitochondrial	Peak Found	High	Not Found	Not Found	Medium	0.032	1.798	1	1	1	1	1014	114.3	7.21	2.2	1	0	100	8.02532e-17		200		48.38		20150.2	68341.4			1
179	P32349	DNA-directed RNA polymerase III subunit RPC3	Peak Found	High	Not Found	Not Found	Medium	0.032	1.801	2	1	1	1	654	74	6.67	0	1	0	100	8.02532e-17		200		33.14		9823.2	26326.7			1
180	Q04049	DNA polymerase eta	Peak Found	High	Not Found	Not Found	Medium	0.029	1.869	1	1	1	1	632	71.5	8.25	0	1	0	100	8.02532e-17		200		25.52		29272	70093.1			1
181	Q00873	Holocytochrome-c1 synthase	Peak Found	High	Not Found	Not Found	High	0	5.559	9	2	2	2	224	26.1	7.09	4.68	2	0	100	8.02532e-17		200		15.21		132271	272904			1
182	Q06247	Putative uncharacterized protein YLR173W	Peak Found	High	Not Found	Not Found	High	0.004	2.903	2	1	1	1	608	69.6	5.01	2.71	1	0	100	8.02532e-17		200		6.81		31265.1	57238.8			1
183	P39722	Mitochondrial Rho GTPase 1	Peak Found	High	Not Found	Not Found	Medium	0.014	2.217	2	1	1	1	662	75.1	5.99	2.02	1	0	100	8.02532e-17		200		1.97		11879.6	19206.8			1
184	P32855	Exocyst complex component SEC8	Peak Found	High	Not Found	Not Found	High	0	4.537	3	2	2	2	1065	122.1	6.74	4.43	2	0	100	8.02532e-17		200		31.92		74254.6	77984.9			1
185	Q06839	PX domain-containing protein YPR097W	Peak Found	High	Not Found	Not Found	Medium	0.026	1.925	1	1	1	1	1073	123	5.78	2.04	1	0	100	8.02532e-17		200		2.89		44020.9	76242.1			1
186	P46963	CTD kinase subunit gamma	Peak Found	High	Not Found	Not Found	Medium	0.019	2.137	3	1	1	1	296	34.8	6.33	0	1	0	100	8.02532e-17		200		10.85		7667.39	10931.5			1
187	Q12091	Damage response protein 1	Peak Found	High	Not Found	Not Found	High	0.006	2.555	5	1	1	1	152	16.7	4.86	0	1	0	100	8.02532e-17		200		21.98		7121.45	16197.3			1
188	Q07950	Sterol esterase 2	Peak Found	High	Not Found	Not Found	Medium	0.023	1.979	3	1	1	1	538	62.4	8.41	2.38	1	0	100	8.02532e-17		200		17.14		16257.6	34483.9			1
189	P47037	Structural maintenance of chromosomes protein 3	Peak Found	High	Not Found	Not Found	High	0.002	2.998	1	1	1	1	1230	141.3	5.81	2.1	1	0	100	8.02532e-17		200		8.02		160735	238534			1
190	P53172	Protein SDS23	Peak Found	High	Not Found	Not Found	High	0	5.102	6	1	1	1	527	58.1	9.04	2.75	1	0	100	8.02532e-17		200		74.94		34039.9	17387.9			1
191	Q12272	tRNA 2'-phosphotransferase	Peak Found	High	Not Found	Not Found	Medium	0.039	1.709	3	1	1	1	230	26.2	9.23	1.94	1	0	100	8.02532e-17		200		3.4		45678.1	79687.8			1
192	P39955	Protein SAP1	Peak Found	High	Not Found	Not Found	High	0	6.148	4	2	2	2	897	100.3	8.97	5.15	2	0	100	8.02532e-17		200		96.52		5864.16	51670.2			1
193	Q06116	Uncharacterized protein YPR117W	Peak Found	High	Not Found	Not Found	Medium	0.034	1.768	0	1	1	1	2489	285.7	8.31	2.07	1	0	100	8.02532e-17		200		38.87		167307	158213			1
194	Q08689	N-alpha-acetyltransferase NAT5	Peak Found	High	Not Found	Not Found	High	0	4.169	8	1	1	1	176	19.7	7.91	3.51	1	0	100	8.02532e-17		200		14.89		200520	269843			1
195	P54003	Protein SUR7	Peak Found	High	Not Found	Not Found	High	0.007	2.458	12	1	1	1	302	33.8	7.47	3.69	1	0	100	8.02532e-17		200		80.55		10496.9	63631.9			1
196	P33760	Peroxisomal ATPase PEX6	Peak Found	High	Not Found	Not Found	Medium	0.021	2.085	1	1	1	1	1030	115.5	5.68	2.06	1	0	100	8.02532e-17		200		1.33		22018.4	37301.4			1
197	P40581	Glutathione peroxidase-like peroxiredoxin HYR1	Peak Found	High	Not Found	Not Found	Medium	0.031	1.811	12	1	1	1	163	18.6	8.19	2.08	1	0	100	8.02532e-17		200		41.13		26629.3	24322.2			1
198	P32477	Glutamate--cysteine ligase	Peak Found	High	Not Found	Not Found	Medium	0.014	2.207	2	1	1	1	678	78.2	6.28	2.1	1	0	100	8.02532e-17		200		27.52		18218.6	44922.5			1
199	P40508	PUP1 protein homolog	Peak Found	High	Not Found	Not Found	Medium	0.024	1.973	7	1	1	1	320	36.9	8.94	2.32	1	0	100	8.02532e-17		200		31.78		13533.1	35543.9			1
200	P25360	Inorganic phosphate transporter PHO87	Peak Found	High	Not Found	Not Found	High	0	3.845	1	1	1	1	923	102.5	6.32	2.22	1	0	100	8.02532e-17		200		6.07		48870.6	74565			1
201	Q99252	Protein ECM3	Peak Found	High	Not Found	Not Found	High	0.006	2.663	3	1	1	1	613	68	8.18	3.08	1	0	100	8.02532e-17		200		12.09		24181.3	33871.4			1
202	P16451	Pyruvate dehydrogenase complex protein X component, mitochondrial	Peak Found	High	Not Found	Not Found	High	0	3.79	4	1	1	1	410	45.3	5.73	0	1	0	100	8.02532e-17		200		12.02		10980.8	21648.3			1
203	P13382	DNA polymerase alpha catalytic subunit A	Peak Found	High	Not Found	Not Found	High	0.004	2.885	1	1	1	1	1468	166.7	6.24	2.11	1	0	100	8.02532e-17		200		15.86		76427.3	101440			1
204	Q06685	Inositol hexakisphosphate and diphosphoinositol-pentakisphosphate kinase	Peak Found	High	Not Found	Not Found	Medium	0.032	1.808	1	1	1	1	1146	129.7	8.65	1.86	1	0	100	8.02532e-17		200		50.68		8716.13	30676.4			1
205	P40151	DNA-dependent ATPase MGS1	Peak Found	High	Not Found	Not Found	Medium	0.035	1.757	3	1	1	1	587	66.5	8.37	0	1	0	100	8.02532e-17		200		67.35		3894.07	18248.5			1
206	P38041	Protein BOB1	Peak Found	High	Not Found	Not Found	High	0.001	3.701	2	2	2	2	980	109.2	9.1	2.02	2	0	100	8.02532e-17		200		53.46		13974	51473.9			1
207	P53849	Zinc finger protein GIS2	Peak Found	High	Not Found	Not Found	High	0.001	3.354	8	1	1	1	153	17.1	7.84	2.69	1	0	100	8.02532e-17		200		30.01		14713.5	37639.5			1
208	P38715	NADPH-dependent aldose reductase GRE3	Peak Found	High	Not Found	Not Found	Medium	0.034	1.77	4	1	1	1	327	37.1	7.08	2.12	1	0	100	8.02532e-17		200		3.51		53682.1	84923.1			1
209	P36533	54S ribosomal protein L39, mitochondrial	Peak Found	High	Not Found	Not Found	High	0.01	2.374	16	1	1	1	70	8	10.77	1.96	1	0	100	8.02532e-17		200		30.12		19316.6	49497.6			1
210	P27636	Cell division control protein 15	Peak Found	High	Not Found	Not Found	High	0.006	2.571	1	1	1	1	974	110.2	7.9	1.72	1	0	100	8.02532e-17		200		24.99		92566.7	107679			1
211	Q06508	Lysophosphatidic acid:oleoyl-CoA acyltransferase 1	Peak Found	High	Not Found	Not Found	High	0	5.369	8	2	2	2	300	33.8	9.7	4.4	2	0	100	8.02532e-17		200		94.3		8553.83	71135.6			1
212	P16661	Chitobiosyldiphosphodolichol beta-mannosyltransferase	Peak Found	High	Not Found	Not Found	Medium	0.029	1.861	5	1	1	1	449	51.9	8.79	0	1	0	100	8.02532e-17		200		56.63		20858.9	14846.2			1
213	Q05123	Actin-like protein ARP9	Peak Found	High	Not Found	Not Found	High	0.006	2.542	3	1	1	1	467	53	5.15	2.05	1	0	100	8.02532e-17		200		10.12		17950.7	25858.6			1
214	Q12458	Putative reductase 1	Peak Found	High	Not Found	Not Found	Medium	0.032	1.787	3	1	1	1	312	34.7	7.12	0	1	0	100	8.02532e-17		200		48.86		15042	12164			1
215	P40102	Uncharacterized protein YER187W	Peak Found	High	Not Found	Not Found	Medium	0.033	1.777	6	1	1	1	141	15.4	4.26	1.7	1	0	100	8.02532e-17		200		42.9		25642.9	22786			1
216	Q08986	S-adenosylmethionine permease SAM3	Peak Found	High	Not Found	Not Found	High	0	4.258	4	1	1	1	587	64.3	7.81	2.04	1	0	100	8.02532e-17		200		6.07		46218.1	70509.6			1
217	P38873	Target of rapamycin complex 1 subunit KOG1	Peak Found	High	Not Found	Not Found	Medium	0.019	2.129	1	1	1	1	1557	177.5	7.83	1.62	1	0	100	8.02532e-17		200		21.75		7573.84	17169.3			1
218	P53954	GDP-Man:Man(3)GlcNAc(2)-PP-Dol alpha-1,2-mannosyltransferase	Peak Found	High	Not Found	Not Found	High	0.003	2.954	2	1	1	1	548	63.1	8.98	2.51	1	0	100	8.02532e-17		200		59.32		22342.5	90827.2			1
219	P37299	Cytochrome b-c1 complex subunit 10, mitochondrial	Peak Found	High	Not Found	Not Found	Medium	0.027	1.9	26	1	1	1	77	8.6	8.53	2.46	1	0	100	8.02532e-17		200		1.91		26587.2	45412.4			1
220	P32802	Transmembrane 9 superfamily member 1	Peak Found	High	Not Found	Not Found	High	0	9.15	5	3	4	2	667	75.9	6.87	10.63	3	1	2.567	0.749382	246.66	166.9	33.1	13.21	124.34	166635	229708	111255	3886.85	1
221	P32905	40S ribosomal protein S0-A	High	High	Not Found	Not Found	High	0	46.554	43	7	65	1	252	28	4.72	165.72	7	6	2.513	0.694792	113.28	144	56	0.11	34.88	2.71336e+07	4.50379e+07	7.67098e+06	6.9004e+06	1
222	P0C0X0	40S ribosomal protein S28-B	High	High	Not Found	Not Found	High	0	11.517	48	3	18	1	67	7.6	10.78	35.88	3	2	0.855	0.694937	97.43	91.6	108.4	11.08	28.17	3.11605e+06	6.061e+06	3.0539e+06	2.48601e+06	1	Acetyl [N-Term]

## Sheet: unique to water
COUNT	Accession	Protein Descriptor [OS=Saccharomyces cerevisiae S288C]	Found in 40% MeOH (Run 1)	Found in 40% MeOH (Run 2)	Found in water (Run 1)	Found in water (Run 2)	Protein FDR Confidence: Combined	Exp. q-value: Combined	Sum PEP Score	Coverage [%]	# Peptides	# PSMs	# Unique Peptides	# AAs	MW [kDa]	calc. pI	Score Sequest HT: Sequest HT	# Peptides (by Search Engine): Sequest HT	# Razor Peptides	Abundance Ratio: 40%MeOH/water	Abundance Ratio Adj. P-Value: 40% MeOH/water	Abundance Ratio Variability [%]: 40% MeOH / water	Abundances (Grouped): 40% MeOH	Abundances (Grouped): water	Abundances (Grouped) CV [%]: 40% MeOH	Abundances (Grouped) CV [%]: water	Abundance: Run 1, 40% MeOH	Abundance: Run 2, 40% MeOH	Abundance: Run 1, water	Abundance: Run 2, water	# Protein Groups	Modifications
1	Q99190	Very-long-chain enoyl-CoA reductase	Not Found	Not Found	High	High	High	0.006	2.706	3	1	2	1	310	36.7	9.54	4.08	1	0	0.01	8.02532e-17			200		34.91			2.80553e+06	921240	1
2	P38801	Exosome complex protein LRP1	Not Found	Not Found	High	High	High	0.001	3.26	7	1	2	1	184	21	9.58	4.31	1	0	0.01	8.02532e-17			200		43.11			22675.3	23137.3	1
3	Q05164	Haze protective factor 1	Not Found	Not Found	High	High	Medium	0.036	1.73	1	1	2	1	967	94.6	4.26	3.33	1	0	0.01	8.02532e-17			200		57.53			26665.2	34379	1
4	Q03337	Trafficking protein particle complex subunit 31	Not Found	Not Found	High	Not Found	Medium	0.022	2.02	3	1	1	1	283	31.7	7.46	1.64	1	0	0.01	8.02532e-17			200					7944.57		1
5	Q02969	Peroxisomal membrane protein PEX25	Not Found	Not Found	High	Not Found	High	0.01	2.332	3	1	1	1	394	44.9	9.03	1.9	1	0	0.01	8.02532e-17			200					23898.5		1
6	Q12222	Glycogen synthase kinase-3 homolog YGK3	Not Found	Not Found	High	Not Found	Medium	0.026	1.927	3	1	1	1	375	43.2	7.55	2.1	1	0	0.01	8.02532e-17			200					588132		1
7	P35732	RNA polymerase II degradation factor 1	Not Found	Not Found	High	Not Found	Medium	0.026	1.932	3	1	1	1	738	83.9	4.98	0	1	0	0.01	8.02532e-17			200					19961.6		1
8	P38070	Serine/threonine-protein kinase YPK3	Not Found	Not Found	High	Not Found	Medium	0.035	1.75	2	1	1	1	525	59.6	7.81	0	1	0	0.01	8.02532e-17			200					8210.44		1
9	P31787	Acyl-CoA-binding protein	Not Found	Not Found	High	Not Found	High	0.006	2.513	14	1	1	1	87	10.1	4.92	2.64	1	0	0.01	8.02532e-17			200					32695.8		1
10	P43634	Activatory protein CHA4	Not Found	Not Found	High	Peak Found	Medium	0.011	2.278	1	1	1	1	648	74.3	6.98	0	1	0	0.01	8.02532e-17			200		53.61			12218.3	2990.47	1
11	P40564	DnaJ-like protein 1	Not Found	Not Found	High	Peak Found	High	0.007	2.448	3	1	1	1	432	48.5	5.2	2.36	1	0	0.01	8.02532e-17			200		17.18			21445.1	14882.4	1
12	P09950	5-aminolevulinate synthase, mitochondrial	Not Found	Not Found	High	Peak Found	High	0.01	2.351	2	1	1	1	548	59.3	7.52	0	1	0	0.01	8.02532e-17			200		42.44			9564.09	9657.38	1
13	P36169	Suppressor of lethality of KEX2 GAS1 double null mutant protein 1	Not Found	Not Found	High	Peak Found	Medium	0.024	1.972	2	1	1	1	355	39.8	5.96	0	1	0	0.01	8.02532e-17			200		42.05			21433.1	21513.8	1
14	Q05518	Protein PAL1	Not Found	Not Found	High	Peak Found	High	0.004	2.737	3	1	1	1	499	55	9.5	2.3	1	0	0.01	8.02532e-17			200		11.53			18589.3	11899.9	1
15	P53067	Importin subunit beta-5	Not Found	Not Found	High	Peak Found	Medium	0.029	1.862	3	1	1	1	1004	113.8	4.67	3.21	1	0	0.01	8.02532e-17			200		33.85			39134.1	13056.9	1
16	P40468	Cell morphogenesis protein PAG1	Not Found	Not Found	High	Peak Found	Medium	0.019	2.117	0	1	1	1	2376	269.7	6.34	0	1	0	0.01	8.02532e-17			200		33.11			7109.91	6228.08	1
17	P52870	Protein transport protein SBH1	Not Found	Not Found	High	Peak Found	High	0.001	3.199	12	1	1	1	82	8.7	10.52	1.62	1	0	0.01	8.02532e-17			200		28.12			108462	88226.5	1
18	P19657	Plasma membrane ATPase 2	Not Found	Not Found	Peak Found	High	High	0	173.046	27	24	280	1	947	102.1	5.03	728.44	24	0	0.01	8.02532e-17			200		116.26			2601.3	14480.8	1
19	P53184	Nicotinamidase	Not Found	Not Found	Peak Found	High	Medium	0.017	2.168	6	1	1	1	216	25	6.27	1.7	1	0	0.01	8.02532e-17			200		23.71			51944.4	39613.9	1
20	Q04835	Uncharacterized membrane protein YMR253C	Not Found	Not Found	Peak Found	High	Medium	0.035	1.74	3	1	1	1	414	46.6	8.76	2.12	1	0	0.01	8.02532e-17			200		20.97			1082431	793318	1
21	Q06344	Pre-rRNA-processing protein ESF1	Not Found	Not Found	Peak Found	High	Medium	0.035	1.733	2	1	1	1	628	72.4	5.26	0	1	0	0.01	8.02532e-17			200		56.02			27403.5	34443.7	1
22	Q12373	HAT1-interacting factor 1	Not Found	Not Found	High	Not Found	Medium	0.026	1.913	7	1	1	1	385	43.4	4.75	2.31	1	0												1
23	Q03579	Ceramide synthase subunit LIP1	Not Found	Not Found	High	Not Found	Medium	0.011	2.269	4	1	1	1	150	17.2	6.67	1.93	1	0												1
24	Q12198	Putative cystathionine gamma-synthase YLL058W	Not Found	Not Found	High	Not Found	Medium	0.022	2.053	4	1	1	1	575	64.2	7.03	2.45	1	0												1
25	Q08959	Phosphatidylglycerol phospholipase C	Not Found	Not Found	High	Not Found	Medium	0.018	2.159	5	1	1	1	321	37	8.66	0	1	0												1

## Sheet: enriched in MeOH
COUNT	Accession	Protein Descriptor [OS=Saccharomyces cerevisiae S288C]	Found in 40% MeOH (Run 1)	Found in 40% MeOH (Run 2)	Found in water (Run 1)	Found in water (Run 2)	Protein FDR Confidence: Combined	Exp. q-value: Combined	Sum PEP Score	Coverage [%]	# Peptides	# PSMs	# Unique Peptides	# AAs	MW [kDa]	calc. pI	Score Sequest HT: Sequest HT	# Peptides (by Search Engine): Sequest HT	# Razor Peptides	Abundance Ratio: 40%MeOH/water	Abundance Ratio Adj. P-Value: 40% MeOH/water	Abundance Ratio Variability [%]: 40% MeOH / water	Abundances (Grouped): 40% MeOH	Abundances (Grouped): water	Abundances (Grouped) CV [%]: 40% MeOH	Abundances (Grouped) CV [%]: water	Abundance: Run 1, 40% MeOH	Abundance: Run 2, 40% MeOH	Abundance: Run 1, water	Abundance: Run 2, water	# Protein Groups	Modifications
1	P46784	40S ribosomal protein S10-B	High	High	High	Not Found	High	0	6.983	17	1	3	1	105	12.7	9.07	10.15	1	0	100	8.02532e-17		200		25.05		1.61501e+06	1.87697e+06			1
2	Q06991	Protein PUN1	High	High	High	Not Found	High	0.004	2.729	7	1	3	1	263	29.2	8.51	8.79	1	0	100	8.02532e-17		200		56.64		53906.1	38362.9			1
3	P32839	Mitochondrial chaperone BCS1	High	High	Not Found	Not Found	High	0	4.005	3	1	2	1	456	51.1	8.78	4.32	1	0	100	8.02532e-17		200		1.29		57064.6	93150.3			1
4	Q12690	60S ribosomal protein L13-A	High	High	Not Found	Not Found	High	0	51.373	45	9	81	1	199	22.5	11.18	201.63	9	0	100	8.02532e-17		200		70.02		1.37298e+06	770809			1
5	Q06142	Importin subunit beta-1	High	High	Not Found	Not Found	Medium	0.014	2.208	1	1	2	1	861	94.7	4.64	4.4	1	0	100	8.02532e-17		200					95915.8			1
6	P38992	Sphingolipid C4-hydroxylase SUR2	High	High	Not Found	Not Found	High	0.004	2.827	3	1	2	1	349	40.7	8.41	3.98	1	0	100	8.02532e-17		200		34.73		60767.2	166797			1
7	Q12220	U3 small nucleolar RNA-associated protein 12	High	High	Not Found	Not Found	High	0	7.118	3	2	3	2	943	106.3	6.02	5.62	2	0	100	8.02532e-17		200		3.6		82037	129622			1
8	Q05031	Mannan endo-1,6-alpha-mannosidase DFG5	High	High	Not Found	Not Found	High	0	8.276	3	1	5	1	458	50.5	4.75	6.65	1	0	100	8.02532e-17		200		0.03		63440.9	105432			1
9	P24004	Peroxisomal ATPase PEX1	High	High	Not Found	Not Found	High	0.006	2.631	1	1	2	1	1043	117.2	6.95	4.48	1	0	100	8.02532e-17		200		6.08		39054.5	59580.5			1
10	P32454	Aminopeptidase 2, mitochondrial	High	High	Not Found	Not Found	Medium	0.011	2.307	2	1	2	1	952	107.7	8.03	0	1	0	100	8.02532e-17		200		38.73		20468.4	19397.5			1
11	Q03691	Protein ROT1	High	High	Not Found	Not Found	High	0	10.013	7	1	3	1	256	28.9	5.64	8.4	1	0	100	8.02532e-17		200		21.58		85464.5	193265			1
12	P36517	54S ribosomal protein L4, mitochondrial	High	High	Not Found	Not Found	Medium	0.011	2.258	6	1	2	1	319	36.9	7.65	5.75	1	0	100	8.02532e-17		200		5.88		28752.7	43988.1			1
13	P15367	Signal peptidase complex catalytic subunit SEC11	High	High	Not Found	Not Found	High	0	8.147	10	2	3	2	167	18.8	9.16	7.94	2	0	100	8.02532e-17		200		12.1		146195	288536			1
14	Q01590	Integral membrane protein SED5	High	High	Not Found	Not Found	High	0	5.276	9	2	3	2	340	38.8	6.98	7.67	2	0	100	8.02532e-17		200		1.61		29425.6	47819.4			1
15	P38770	Nucleus export protein BRL1	High	High	Not Found	Not Found	High	0.001	3.599	2	1	2	1	471	53.4	4.86	4.54	1	0	100	8.02532e-17		200		7.41		42424.5	63505.2			1
16	Q12429	Diphthine--ammonia ligase	High	High	Not Found	Not Found	High	0.01	2.326	3	1	2	1	685	77.9	5.88	2.56	1	0	100	8.02532e-17		200		1.92		20908.3	33829.5			1
17	P20434	DNA-directed RNA polymerases I, II, and III subunit RPABC1	High	High	Not Found	Not Found	High	0.001	3.704	5	1	3	1	215	25.1	9.1	6.54	1	0	100	8.02532e-17		200		8.84		50928.8	95959.2			1
18	Q08096	RNA 3'-terminal phosphate cyclase-like protein	High	High	Not Found	Not Found	High	0.001	3.454	3	1	2	1	367	40.1	8.84	4.66	1	0	100	8.02532e-17		200		9.72		41589.5	60253.8			1
19	P52593	Nucleoporin NUP188	High	High	Not Found	Not Found	Medium	0.011	2.299	1	1	2	1	1655	188.5	5.6	1.85	1	0	100	8.02532e-17		200		3.15		28252.9	44921.6			1
20	P40070	U6 snRNA-associated Sm-like protein LSm4	High	High	Not Found	Not Found	High	0.001	3.436	6	1	2	1	187	21.3	9.45	4.36	1	0	100	8.02532e-17		200		21.95		38538.6	46852.3			1
21	Q6Q560	Protein ISD11	High	High	Not Found	Not Found	Medium	0.019	2.145	10	1	2	1	94	11.3	10.33	4.46	1	0	100	8.02532e-17		200		7.45		100246	185190			1
22	P38713	Oxysterol-binding protein homolog 3	High	High	Not Found	Not Found	High	0	5.635	4	2	3	2	996	113.7	8.57	8.12	2	0	100	8.02532e-17		200		18.6		40648.7	51867.3			1
23	P53254	U3 small nucleolar RNA-associated protein 22	High	High	Not Found	Not Found	High	0	3.777	2	2	3	2	1237	140.4	8.46	5.09	2	0	100	8.02532e-17		200		21.56		53484.4	65393.9			1
24	Q06678	54S ribosomal protein L35, mitochondrial	High	High	Not Found	Not Found	High	0	4.325	7	2	2	2	367	42.8	9.51	5.07	2	0	100	8.02532e-17		200		2.67		44711.2	77195.8			1
25	P48445	Biotin--protein ligase	High	High	Not Found	Not Found	High	0.001	3.509	2	1	2	1	690	76.3	6.92	4.85	1	0	100	8.02532e-17		200				17308.4				1
26	Q12511	Pyruvate dehydrogenase (acetyl-transferring)-phosphatase 1, mitochondrial	High	High	Not Found	Not Found	High	0	5.145	6	2	3	2	572	63.6	8.62	7.31	2	0	100	8.02532e-17		200		5.24		54237.1	97115.9			1
27	P00431	Cytochrome c peroxidase, mitochondrial	High	High	Not Found	Not Found	High	0.001	3.465	10	2	2	2	361	40.3	6.38	0	2	0	100	8.02532e-17		200		38.08		7174.11	20716.4			1
28	Q05881	Uncharacterized protein YLR287C	High	High	Not Found	Not Found	High	0	5.139	4	1	2	1	355	40.9	5.07	2.56	1	0	100	8.02532e-17		200				48319.1				1
29	Q02046	Methylenetetrahydrofolate dehydrogenase	High	High	Not Found	Not Found	High	0	8.976	9	2	3	2	320	36.2	6.99	9.12	2	0	100	8.02532e-17		200		2.04		48563.2	78438.7			1
30	P39006	Phosphatidylserine decarboxylase proenzyme 1, mitochondrial	High	High	Not Found	Not Found	High	0	7.69	7	3	3	3	500	56.6	9.1	6.2	3	0	100	8.02532e-17		200		14.55		102251	138290			1
31	P40502	Altered inheritance of mitochondria protein 19, mitochondrial	High	High	Not Found	Not Found	High	0	4.612	15	1	2	1	157	16.9	9.99	7.06	1	0	100	8.02532e-17		200		30.23		76976.9	82902.4			1
32	Q12221	mRNA-binding protein PUF2	High	High	Not Found	Not Found	Medium	0.021	2.071	1	1	2	1	1075	119.4	8.78	4.81	1	0	100	8.02532e-17		200				118583				1
33	P25374	Cysteine desulfurase, mitochondrial	High	High	Not Found	Not Found	High	0	5.817	3	1	2	1	497	54.4	8.19	5.42	1	0	100	8.02532e-17		200		20.93		29741.5	66627.8			1
34	P39990	13 kDa ribonucleoprotein-associated protein	High	High	Not Found	Not Found	High	0.008	2.401	8	1	2	1	126	13.6	7.85	4.75	1	0	100	8.02532e-17		200		112.95		241064	44857.2			1
35	P38084	Leu/Val/Ile amino-acid permease	High	High	Not Found	Not Found	High	0.001	3.517	2	1	2	1	609	67.7	8.24	4.71	1	0	100	8.02532e-17		200		4.92		50238.8	89549			1
36	P26755	Replication factor A protein 3	High	High	Not Found	Not Found	High	0	4.457	12	1	2	1	122	13.8	4.79	5.42	1	0	100	8.02532e-17		200		35.45		19914	55258.6			1
37	Q02486	ARS-binding factor 2, mitochondrial	High	High	Not Found	Not Found	High	0.002	3.025	5	1	2	1	183	21.5	9.69	5.35	1	0	100	8.02532e-17		200		33.55		60058.2	161953			1
38	Q03218	Mitochondrial metal transporter 1	High	High	Not Found	Not Found	High	0	6.323	6	2	3	2	510	56.2	7.09	7.64	2	0	100	8.02532e-17		200		45.06		35327.6	113657			1
39	P32842	V-type proton ATPase subunit c'	High	High	Not Found	Not Found	High	0	5.082	11	1	2	1	164	17	7.72	6.46	1	0	100	8.02532e-17		200		57.77		97477.5	68062.7			1
40	Q3E824	Uncharacterized protein YOR020W-A	High	High	Not Found	Not Found	High	0.007	2.48	12	1	2	1	90	9.6	8.38	4.58	1	0	100	8.02532e-17		200		47.11		56041.1	46611.4			1
41	P40215	External NADH-ubiquinone oxidoreductase 1, mitochondrial	High	High	Not Found	Not Found	High	0.001	3.311	2	1	2	1	560	62.7	9.28	4.07	1	0	100	8.02532e-17		200		6.12		41939.8	63942.6			1
42	P40467	Activator of stress genes 1	High	High	Not Found	Not Found	High	0.003	2.927	2	1	2	1	964	108.7	6.16	3.77	1	0	100	8.02532e-17		200		30.32		36404.4	93563.7			1
43	Q06170	Uncharacterized membrane protein YLR326W	High	High	Not Found	Not Found	High	0.007	2.478	7	1	2	1	240	27.4	9.36	2	1	0	100	8.02532e-17		200		30.68		5083.54	13134.5			1
44	Q03161	Glucose-6-phosphate 1-epimerase	High	High	Not Found	Not Found	High	0	9.006	18	4	4	4	297	33.9	6.13	9.22	4	0	100	8.02532e-17		200		3.76		213355	336330			1
45	Q06107	Uncharacterized TLC domain-containing protein YPR114W	High	High	Not Found	Not Found	High	0	6.113	8	2	6	2	315	36.7	9.22	15.99	2	0	100	8.02532e-17		200		17.7		293393	379257			1	Acetyl [N-Term]
46	P0CH09	Ubiquitin-60S ribosomal protein L40	High	High	Not Found	Not Found	High	0	17.246	31	4	16	1	128	14.5	9.83	24.24	4	0	100	8.02532e-17		200		7.48		44789.2	66979.4			1
47	P23900	Glycerol uptake/efflux facilitator protein	High	High	Not Found	Not Found	High	0	5.529	5	2	3	2	669	73.8	6.9	2.86	2	0	100	8.02532e-17		200		52.17		38127.4	137503			1
48	Q04201	CUE domain-containing protein CUE4	High	High	Not Found	Not Found	High	0	7.885	24	1	3	1	117	12.9	7.52	10.09	1	0	100	8.02532e-17		200		66.22		331808	199786			1
49	P38063	Ribose-phosphate pyrophosphokinase 4	High	High	Not Found	Not Found	High	0	11.069	18	3	4	2	326	35.7	6.39	13.19	3	0	100	8.02532e-17		200		10.59		31903.3	45647.9			1
50	P36062	Vacuolar amino acid transporter 3	High	High	Not Found	Not Found	High	0	6.184	2	1	2	1	692	75.4	8.53	4.47	1	0	100	8.02532e-17		200		27.76		23519.3	58203			1
51	P40016	26S proteasome regulatory subunit RPN3	High	High	Not Found	Not Found	High	0	4.816	3	1	2	1	523	60.4	5.6	4.64	1	0	100	8.02532e-17		200		8.57		28861.2	42499			1
52	Q12109	Tryptophan--tRNA ligase, cytoplasmic	High	High	Not Found	Not Found	High	0	5.186	4	1	2	1	432	49.3	6.81	5.66	1	0	100	8.02532e-17		200		12.28		24248	47980.6			1
53	P38166	Protein transport protein SFT2	High	High	Not Found	Not Found	High	0	6.606	12	2	3	2	215	24.3	8.84	8.68	2	0	100	8.02532e-17		200		14.88		320392	431240			1
54	P53283	Polyamine transporter 2	High	High	Not Found	Not Found	High	0.001	3.535	4	1	2	1	614	67.5	7.01	2.91	1	0	100	8.02532e-17		200		45.12		52984.5	45472.1			1
55	P36150	Uroporphyrinogen-III C-methyltransferase	High	High	Not Found	Not Found	Medium	0.031	1.834	2	1	2	1	593	66.1	6.57	2.37	1	0	100	8.02532e-17		200		6.95		48011.3	72343.4			1
56	Q05521	Diacylglycerol pyrophosphate phosphatase 1	High	High	Not Found	Not Found	High	0.001	3.502	6	1	2	1	289	33.5	6.44	4.52	1	0	100	8.02532e-17		200		14.71		85333.8	115142			1
57	Q06705	Phosphatidylinositol transfer protein CSR1	High	High	Not Found	Not Found	Medium	0.032	1.807	2	1	2	1	408	47.4	6.62	3.67	1	0	100	8.02532e-17		200		19.64		31732.1	69776.2			1
58	P53895	Protein ASI2	High	High	Not Found	Not Found	High	0.002	3.013	5	1	2	1	289	33	9.52	4.8	1	0	100	8.02532e-17		200		15.7		34583.4	46002.7			1
59	P23724	Proteasome subunit beta type-6	High	High	Not Found	Not Found	High	0	5.426	10	2	4	2	241	26.9	6.07	9.19	2	0	100	8.02532e-17		200		5.46		106675	191593			1
60	Q06205	FK506-binding protein 4	High	High	Not Found	Not Found	Medium	0.021	2.096	3	1	2	1	392	43.9	4.69	1.93	1	0	100	8.02532e-17		200		14.93		45936	61782.1			1
61	P25626	54S ribosomal protein IMG1, mitochondrial	High	High	Not Found	Not Found	High	0	5.995	13	2	3	2	169	19.4	10.39	7.28	2	0	100	8.02532e-17		200		18.52		45927.3	99365.4			1
62	P00128	Cytochrome b-c1 complex subunit 7, mitochondrial	High	High	Not Found	Not Found	High	0	7.906	26	2	3	2	127	14.6	5.88	10.11	2	0	100	8.02532e-17		200		4.61		143680	223785			1
63	Q03713	Respiratory supercomplex factor 1, mitochondrial	High	High	Not Found	Not Found	High	0	6.396	13	2	3	2	159	18.5	9.1	6.64	2	0	100	8.02532e-17		200		10.28		121861	234373			1
64	Q07872	Epsin-4	High	High	Not Found	Not Found	High	0.001	3.092	6	1	2	1	247	28.3	9.36	5.31	1	0	100	8.02532e-17		200		37.25		46704.9	45269.1			1
65	P33401	Phosphoglucomutase 1	High	High	Not Found	Not Found	High	0	6.206	4	2	2	2	570	63.1	7.24	4.64	2	0	100	8.02532e-17		200		27.36		83956.3	206557			1
66	P32899	U3 small nucleolar ribonucleoprotein protein IMP3	High	High	Not Found	Not Found	High	0	4.479	14	2	3	2	183	21.9	9.76	6.38	2	0	100	8.02532e-17		200		7.84		170687	317070			1
67	P39994	Putative 2-hydroxyacyl-CoA lyase	High	High	Not Found	Not Found	High	0	3.802	3	1	2	1	560	61.3	7.66	5.08	1	0	100	8.02532e-17		200		14.18		43740.8	88931.7			1
68	P00424	Cytochrome c oxidase subunit 5A, mitochondrial	High	High	Not Found	Not Found	High	0	11.973	19	2	7	1	153	17.1	9.82	17.09	2	0	100	8.02532e-17		200		10.48		37085.9	71530.2			1
69	Q08023	Protein FMP25, mitochondrial	High	High	Not Found	Not Found	High	0	4.886	4	2	2	2	583	66.6	8.87	5.27	2	0	100	8.02532e-17		200		45.12		148963	479761			1
70	P53734	ATP-dependent RNA helicase DBP6	High	High	Not Found	Not Found	High	0.007	2.429	2	1	2	1	629	70.3	6.25	4.76	1	0	100	8.02532e-17		200					35437			1
71	P53751	Uncharacterized membrane glycoprotein YNR065C	High	High	Not Found	Not Found	High	0	19.104	6	5	8	2	1116	125.1	5.07	21.38	5	0	100	8.02532e-17		200		71.85		59283.7	32153.7			1
72	P32191	Glycerol-3-phosphate dehydrogenase, mitochondrial	High	High	Not Found	Not Found	High	0.001	3.576	2	1	2	1	649	72.3	7.9	4.8	1	0	100	8.02532e-17		200		39.46		85401.9	80038.3			1
73	Q03674	Lysophospholipase 2	High	High	Not Found	Not Found	High	0	6.358	3	2	4	2	706	75.4	4.7	9.94	2	0	100	8.02532e-17		200		15.46		346450	462494			1
74	P48563	Protein MON2	High	High	Not Found	Not Found	High	0	7.076	1	1	2	1	1636	186.7	5.69	3.67	1	0	100	8.02532e-17		200		17.13		28744.3	37464.2			1
75	P38998	Saccharopine dehydrogenase	High	High	Not Found	Not Found	High	0.001	3.054	3	1	2	1	373	41.4	9.1	4.59	1	0	100	8.02532e-17		200		49		52173.9	42100.7			1
76	P32501	Translation initiation factor eIF-2B subunit epsilon	High	High	Not Found	Not Found	High	0.001	3.744	2	1	2	1	712	81.1	4.81	4.15	1	0	100	8.02532e-17		200		29.63		42893.5	46604.7			1
77	Q12066	Nuclear rim protein 1	High	Not Found	Not Found	Not Found	High	0	4.195	4	1	1	1	484	56.9	9.01	3.58	1	0	100	8.02532e-17		200				25057.2				1
78	Q08920	Nuclear cap-binding protein subunit 2	High	Not Found	Not Found	Not Found	Medium	0.026	1.906	4	1	1	1	208	23.8	5.16	0	1	0	100	8.02532e-17		200				40181.9				1
79	P47140	Altered inheritance rate of mitochondria protein 25	High	Not Found	Not Found	Not Found	High	0.01	2.347	6	1	1	1	327	37.5	8.65	2.68	1	0	100	8.02532e-17		200				12935				1
80	P25037	Ubiquitin carboxyl-terminal hydrolase 1	High	Not Found	Not Found	Not Found	High	0	3.79	2	1	2	1	809	92.7	4.89	5.67	1	0	100	8.02532e-17		200				74417.2				1
81	P24279	DNA replication licensing factor MCM3	High	Not Found	Not Found	Not Found	Medium	0.024	2.002	2	1	1	1	971	107.5	5.45	0	1	0	100	8.02532e-17		200				13684.1				1
82	P53894	Serine/threonine-protein kinase CBK1	High	Not Found	Not Found	Not Found	Medium	0.035	1.738	1	1	1	1	756	86.9	7.91	1.61	1	0	100	8.02532e-17		200				46954.5				1
83	Q12207	Non-classical export protein 2	High	Not Found	Not Found	Not Found	High	0.006	2.576	5	1	1	1	173	19	9.39	2.21	1	0	100	8.02532e-17		200				140587				1
84	P38234	Protein RFS1	High	Not Found	Not Found	Not Found	High	0.001	3.229	16	1	1	1	210	22.9	5.29	4.77	1	0	100	8.02532e-17		200				47826.9				1
85	P00360	Glyceraldehyde-3-phosphate dehydrogenase 1	High	Not Found	Not Found	Not Found	High	0	33.325	30	10	33	1	332	35.7	8.28	56.99	10	0	100	8.02532e-17		200				65954.2				1
86	P32473	Pyruvate dehydrogenase E1 component subunit beta, mitochondrial	High	Not Found	Not Found	Not Found	High	0.007	2.446	3	1	1	1	366	40	5.3	2.25	1	0	100	8.02532e-17		200				47580.9				1
87	P47019	Ribosome biogenesis protein ALB1	High	Not Found	Not Found	Not Found	High	0.001	3.737	14	1	1	1	175	19.3	10.02	2.8	1	0	100	8.02532e-17		200				25237.2				1
88	P37267	Assembly factor CBP4	High	Peak Found	Not Found	High	Medium	0.031	1.836	7	1	2	1	147	17.5	9.17	1.73	1	0	100	8.02532e-17		200		9.99		108486	207782			1
89	Q03362	Uncharacterized protein YDR476C	High	Peak Found	Not Found	Not Found	High	0.001	3.689	6	1	1	1	224	25.3	6.54	2.47	1	0	100	8.02532e-17		200		29.48		39207.2	42696.5			1
90	P51401	60S ribosomal protein L9-B	High	Peak Found	Not Found	Not Found	High	0	32.197	47	7	83	1	191	21.6	9.66	214.82	7	0	100	8.02532e-17		200		93.9		79781	26787.1			1
91	P0CF36	Putative uncharacterized protein YPL276W	High	Peak Found	Not Found	Not Found	High	0.004	2.882	8	1	1	1	145	15.9	4.94	1.92	1	0	100	8.02532e-17		200		72.42		75590.3	40550.3			1
92	P25515	V-type proton ATPase subunit c	High	Peak Found	Not Found	Not Found	High	0.001	3.503	11	1	1	1	160	16.3	7.99	3.06	1	0	100	8.02532e-17		200		18.02		161996	208450			1
93	P04806	Hexokinase-1	High	Peak Found	Not Found	Not Found	High	0	5.127	6	2	2	1	485	53.7	5.45	2.47	2	0	100	8.02532e-17		200		7.22		10974.2	20208.3			1
94	P30619	Protein transport protein SEC1	High	Peak Found	Not Found	Not Found	Medium	0.038	1.713	2	1	1	1	724	83.4	7.3	2.52	1	0	100	8.02532e-17		200		49.41		29824.4	23909.4			1
95	P38330	RNA-binding protein RMD9-like, mitochondrial	High	Peak Found	Not Found	Not Found	High	0	6.36	4	2	2	2	731	83.7	7.52	4.53	2	0	100	8.02532e-17		200		44.57		55674.5	48196.7			1
96	P35206	Mannosyl phosphorylinositol ceramide synthase regulatory protein CSG2	High	Peak Found	Not Found	Not Found	High	0.003	2.921	7	1	2	1	410	45.4	7.28	4.97	1	0	100	8.02532e-17		200		58.95		57912.7	39626			1
97	Q02455	Protein MLP1	High	Peak Found	Not Found	Not Found	Medium	0.025	1.953	1	1	1	1	1875	218.3	5.2	2.18	1	0	100	8.02532e-17		200		55.09		14713.3	55679.4			1
98	P24482	DNA polymerase epsilon subunit B	High	Peak Found	Not Found	Not Found	High	0.006	2.695	1	1	1	1	689	78.3	6.19	1.96	1	0	100	8.02532e-17		200		8.93		34074.2	49919.1			1
99	P38329	Vacuolar cation-chloride cotransporter 1	High	Peak Found	Not Found	Not Found	High	0.001	3.217	1	1	1	1	1120	123.9	8.54	1.92	1	0	100	8.02532e-17		200		38.29		29973.8	28595.7			1
100	P39965	Probable proline--tRNA ligase, mitochondrial	High	Peak Found	Not Found	Not Found	Medium	0.014	2.188	3	1	1	1	576	65.8	7.42	0	1	0	100	8.02532e-17		200		6.04		6894.49	10523.8			1
101	Q99315	Transposon Ty3-G Gag-Pol polyprotein	High	Peak Found	Not Found	Not Found	Medium	0.022	2.032	1	1	1	1	1547	178.2	8.82	2.17	1	0	100	8.02532e-17		200		50.7		9175.04	7202.82			1
102	P32381	Actin-related protein 2	High	Peak Found	Not Found	Not Found	High	0.001	3.56	4	1	1	1	391	44	5.78	2.62	1	0	100	8.02532e-17		200		17.28		43540.8	56625.7			1
103	P32451	Biotin synthase, mitochondrial	High	Peak Found	Not Found	Not Found	High	0.01	2.371	4	1	1	1	375	41.9	8.5	0	1	0	100	8.02532e-17		200		3.59		27592.2	43601.8			1
104	P53946	Actin-related protein 5	High	Peak Found	Not Found	Not Found	Medium	0.035	1.76	2	1	1	1	755	87.5	5.47	2.07	1	0	100	8.02532e-17		200		27.51		23968.7	26871.7			1
105	Q06091	Pre-mRNA-splicing factor SNT309	High	Peak Found	Not Found	Not Found	Medium	0.012	2.25	5	1	3	1	175	20.7	8.51	5.95	1	0	100	8.02532e-17		200		4.69		389167	605476			1
106	P05747	60S ribosomal protein L29	High	Peak Found	Not Found	Not Found	Medium	0.019	2.13	15	1	1	1	59	6.7	11.31	1.81	1	0	100	8.02532e-17		200		22.88		67388.2	80835.9			1
107	Q03723	Dolichyl-diphosphooligosaccharide--protein glycosyltransferase subunit OST6	High	Peak Found	Not Found	Not Found	High	0.004	2.744	5	1	1	1	332	37.9	8.44	2.89	1	0	100	8.02532e-17		200		63.38		43328.9	27448.9			1
108	P25373	Glutaredoxin-1	High	Peak Found	Not Found	Not Found	Medium	0.022	2.013	14	1	1	1	110	12.4	5.06	3.16	1	0	100	8.02532e-17		200		28.91		79844.3	87680.1			1
109	P38254	Probable tubulin--tyrosine ligase PBY1	High	Peak Found	Not Found	Not Found	High	0.007	2.478	2	1	1	1	753	86.3	4.94	2.31	1	0	100	8.02532e-17		200		20.84		22611.2	50587.7			1
110	P32341	Vacuolar ATPase assembly integral membrane protein VPH2	High	Peak Found	Not Found	Not Found	High	0.001	3.081	7	1	1	1	215	25.3	9.03	2.62	1	0	100	8.02532e-17		200		58.76		35545.6	24401.7			1
111	P57744	Mitochondrial import inner membrane translocase subunit TIM8	High	Peak Found	Not Found	Not Found	High	0.004	2.769	14	1	1	1	87	9.8	5.38	2.86	1	0	100	8.02532e-17		200		3		42247.1	73278.4			1
112	P48559	GTP-binding protein YPT11	High	Peak Found	Not Found	Not Found	Medium	0.011	2.277	4	1	1	1	417	47.1	6.8	1.96	1	0	100	8.02532e-17		200		22.94		19951.5	23909.7			1
113	P17076	60S ribosomal protein L8-A	High	Peak Found	Not Found	Not Found	High	0	82.093	50	18	158	1	256	28.1	10.04	366.75	18	0	100	8.02532e-17		200		16.04		522880	1091747			1
114	P38072	Protein SCO2, mitochondrial	High	Peak Found	Not Found	Not Found	High	0.001	3.04	5	1	1	1	301	34.9	8.12	3.05	1	0	100	8.02532e-17		200		2.21		54886	94151.5			1
[truncated: 176 more rows]

## Sheet: enriched in water
COUNT	Accession	Protein Descriptor [OS=Saccharomyces cerevisiae S288C]	Found in 40% MeOH (Run 1)	Found in 40% MeOH (Run 2)	Found in water (Run 1)	Found in water (Run 2)	Protein FDR Confidence: Combined	Exp. q-value: Combined	Sum PEP Score	Coverage [%]	# Peptides	# PSMs	# Unique Peptides	# AAs	MW [kDa]	calc. pI	Score Sequest HT: Sequest HT	# Peptides (by Search Engine): Sequest HT	# Razor Peptides	Abundance Ratio: 40%MeOH/water	Abundance Ratio Adj. P-Value: 40% MeOH/water	Abundance Ratio Variability [%]: 40% MeOH / water	Abundances (Grouped): 40% MeOH	Abundances (Grouped): water	Abundances (Grouped) CV [%]: 40% MeOH	Abundances (Grouped) CV [%]: water	Abundance: Run 1, 40% MeOH	Abundance: Run 2, 40% MeOH	Abundance: Run 1, water	Abundance: Run 2, water	# Protein Groups	Modifications
[truncated: 79 more rows]
