# Supplementary material for: Enhanced Electrophoretic Depletion of Sodium Dodecyl Sulfate with Methanol for Membrane Proteome Analysis by Mass Spectrometry
Source: Proteomes. 2024 Feb 2;12(1):5. doi: 10.3390/proteomes12010005 (PMC10885059; doi:10.3390/proteomes12010005)
Supplement: Supplementary file 1 [file proteomes-12-00005-s001.zip › Table S2_Gene ontology data.xlsx]

## Sheet: Enriched in 40% MeOH
From	Entry	Reviewed	Entry Name	Protein names	Gene Names	Organism	Length	Gene Ontology (biological process)	Gene Ontology (cellular component)	Gene Ontology (GO)	Subcellular location [CC]	Transmembrane	Topological domain	Gene Ontology (molecular function)	Gene Ontology IDs	MEMBRANE	# transmembrane segments
P36051	P36051	reviewed	MCD4_YEAST	GPI ethanolamine phosphate transferase 1 (EC 2.-.-.-) (Morphogenesis checkpoint-dependent protein 4) (Supersecretion of u-PA protein 21)	MCD4 FSR2 SSU21 ZRG16 YKL165C YKL619	Saccharomyces cerevisiae (strain ATCC 204508 / S288c) (Baker's yeast)	919	ATP transport [GO:0015867]; cell wall organization [GO:0071555]; GPI anchor biosynthetic process [GO:0006506]	endoplasmic reticulum [GO:0005783]; endoplasmic reticulum membrane [GO:0005789]; fungal-type cell wall [GO:0009277]; fungal-type vacuole [GO:0000324]; Golgi membrane [GO:0000139]; vacuolar membrane [GO:0005774]	endoplasmic reticulum [GO:0005783]; endoplasmic reticulum membrane [GO:0005789]; fungal-type cell wall [GO:0009277]; fungal-type vacuole [GO:0000324]; Golgi membrane [GO:0000139]; vacuolar membrane [GO:0005774]; mannose-ethanolamine phosphotransferase activity [GO:0051377]; sulfuric ester hydrolase activity [GO:0008484]; ATP transport [GO:0015867]; cell wall organization [GO:0071555]; GPI anchor …	SUBCELLULAR LOCATION: Endoplasmic reticulum membrane {ECO:0000269|PubMed:35015055}; Multi-pass membrane protein {ECO:0000255}. Golgi apparatus membrane; Multi-pass membrane protein. Vacuole membrane; Multi-pass membrane protein.	TRANSMEM 10..30; /note="Helical"; /evidence="ECO:0000255"; TRANSMEM 458..478; /note="Helical"; /evidence="ECO:0000255"; TRANSMEM 489..509; /note="Helical"; /evidence="ECO:0000255"; TRANSMEM 513..533; /note="Helical"; /evidence="ECO:0000255"; TRANSMEM 554..574; /note="Helical"; /evidence="ECO:0000255"; TRANSMEM 577..597; /note="Helical"; /evidence="ECO:0000255"; TRANSMEM 599..619; /note="Helical";…	TOPO_DOM 1..9; /note="Cytoplasmic"; /evidence="ECO:0000255"; TOPO_DOM 31..457; /note="Lumenal"; /evidence="ECO:0000255"; TOPO_DOM 479..488; /note="Cytoplasmic"; /evidence="ECO:0000255"; TOPO_DOM 510..512; /note="Lumenal"; /evidence="ECO:0000255"; TOPO_DOM 534..553; /note="Cytoplasmic"; /evidence="ECO:0000255"; TOPO_DOM 575..576; /note="Lumenal"; /evidence="ECO:0000255"; TOPO_DOM 598; /note="Cytop…	mannose-ethanolamine phosphotransferase activity [GO:0051377]; sulfuric ester hydrolase activity [GO:0008484]	GO:0000139; GO:0000324; GO:0005774; GO:0005783; GO:0005789; GO:0006506; GO:0008484; GO:0009277; GO:0015867; GO:0051377; GO:0071555	TRUE	15
Q12200	Q12200	reviewed	NPC1_YEAST	NPC intracellular sterol transporter 1-related protein 1 (Niemann-Pick type C-related protein 1)	NCR1 YPL006W	Saccharomyces cerevisiae (strain ATCC 204508 / S288c) (Baker's yeast)	1170	sphingolipid metabolic process [GO:0006665]; sterol transport [GO:0015918]	endoplasmic reticulum [GO:0005783]; fungal-type vacuole membrane [GO:0000329]; membrane [GO:0016020]	endoplasmic reticulum [GO:0005783]; fungal-type vacuole membrane [GO:0000329]; membrane [GO:0016020]; sterol binding [GO:0032934]; sphingolipid metabolic process [GO:0006665]; sterol transport [GO:0015918]	SUBCELLULAR LOCATION: Vacuole membrane {ECO:0000269|PubMed:14562095, ECO:0000269|PubMed:14970192, ECO:0000269|PubMed:15522102}; Multi-pass membrane protein {ECO:0000269|PubMed:14562095, ECO:0000269|PubMed:14970192, ECO:0000269|PubMed:15522102}.	TRANSMEM 260..280; /note="Helical"; /evidence="ECO:0000255"; TRANSMEM 341..361; /note="Helical"; /evidence="ECO:0000255"; TRANSMEM 556..576; /note="Helical"; /evidence="ECO:0000255"; TRANSMEM 585..605; /note="Helical"; /evidence="ECO:0000255"; TRANSMEM 616..636; /note="Helical"; /evidence="ECO:0000255"; TRANSMEM 667..687; /note="Helical"; /evidence="ECO:0000255"; TRANSMEM 698..718; /note="Helical…		sterol binding [GO:0032934]	GO:0000329; GO:0005783; GO:0006665; GO:0015918; GO:0016020; GO:0032934	TRUE	13
P38084	P38084	reviewed	BAP2_YEAST	Leu/Val/Ile amino-acid permease (Branched-chain amino-acid permease 2)	BAP2 YBR068C YBR0629	Saccharomyces cerevisiae (strain ATCC 204508 / S288c) (Baker's yeast)	609	amino acid transmembrane transport [GO:0003333]; amino acid transport [GO:0006865]; leucine import across plasma membrane [GO:0098713]; transmembrane transport [GO:0055085]	endoplasmic reticulum [GO:0005783]; plasma membrane [GO:0005886]	endoplasmic reticulum [GO:0005783]; plasma membrane [GO:0005886]; amino acid transmembrane transporter activity [GO:0015171]; L-phenylalanine transmembrane transporter activity [GO:0015192]; amino acid transmembrane transport [GO:0003333]; amino acid transport [GO:0006865]; leucine import across plasma membrane [GO:0098713]; transmembrane transport [GO:0055085]	SUBCELLULAR LOCATION: Cell membrane {ECO:0000269|PubMed:14562095}; Multi-pass membrane protein {ECO:0000269|PubMed:14562095}.	TRANSMEM 100..120; /note="Helical"; /evidence="ECO:0000255"; TRANSMEM 124..144; /note="Helical"; /evidence="ECO:0000255"; TRANSMEM 174..194; /note="Helical"; /evidence="ECO:0000255"; TRANSMEM 211..231; /note="Helical"; /evidence="ECO:0000255"; TRANSMEM 236..256; /note="Helical"; /evidence="ECO:0000255"; TRANSMEM 290..310; /note="Helical"; /evidence="ECO:0000255"; TRANSMEM 329..349; /note="Helical…	TOPO_DOM 1..99; /note="Cytoplasmic"; /evidence="ECO:0000255"; TOPO_DOM 121..123; /note="Extracellular"; /evidence="ECO:0000255"; TOPO_DOM 145..173; /note="Cytoplasmic"; /evidence="ECO:0000255"; TOPO_DOM 195..210; /note="Extracellular"; /evidence="ECO:0000255"; TOPO_DOM 232..235; /note="Cytoplasmic"; /evidence="ECO:0000255"; TOPO_DOM 257..289; /note="Extracellular"; /evidence="ECO:0000255"; TOPO_D…	amino acid transmembrane transporter activity [GO:0015171]; L-phenylalanine transmembrane transporter activity [GO:0015192]	GO:0003333; GO:0005783; GO:0005886; GO:0006865; GO:0015171; GO:0015192; GO:0055085; GO:0098713	TRUE	12
P53283	P53283	reviewed	TPO2_YEAST	Polyamine transporter 2	TPO2 YGR138C G6417	Saccharomyces cerevisiae (strain ATCC 204508 / S288c) (Baker's yeast)	614	spermine transport [GO:0000296]; transmembrane transport [GO:0055085]	cell periphery [GO:0071944]; fungal-type vacuole membrane [GO:0000329]; plasma membrane [GO:0005886]	cell periphery [GO:0071944]; fungal-type vacuole membrane [GO:0000329]; plasma membrane [GO:0005886]; antiporter activity [GO:0015297]; spermine transmembrane transporter activity [GO:0000297]; spermine transport [GO:0000296]; transmembrane transport [GO:0055085]	SUBCELLULAR LOCATION: Cell membrane {ECO:0000269|PubMed:12562762, ECO:0000269|PubMed:14562095}; Multi-pass membrane protein {ECO:0000269|PubMed:12562762, ECO:0000269|PubMed:14562095}.	TRANSMEM 174..194; /note="Helical"; /evidence="ECO:0000255"; TRANSMEM 207..227; /note="Helical"; /evidence="ECO:0000255"; TRANSMEM 237..257; /note="Helical"; /evidence="ECO:0000255"; TRANSMEM 267..287; /note="Helical"; /evidence="ECO:0000255"; TRANSMEM 298..318; /note="Helical"; /evidence="ECO:0000255"; TRANSMEM 327..347; /note="Helical"; /evidence="ECO:0000255"; TRANSMEM 408..428; /note="Helical…	TOPO_DOM 1..173; /note="Cytoplasmic"; /evidence="ECO:0000255"; TOPO_DOM 195..206; /note="Extracellular"; /evidence="ECO:0000255"; TOPO_DOM 228..236; /note="Cytoplasmic"; /evidence="ECO:0000255"; TOPO_DOM 258..266; /note="Extracellular"; /evidence="ECO:0000255"; TOPO_DOM 288..297; /note="Cytoplasmic"; /evidence="ECO:0000255"; TOPO_DOM 319..326; /note="Extracellular"; /evidence="ECO:0000255"; TOPO_…	antiporter activity [GO:0015297]; spermine transmembrane transporter activity [GO:0000297]	GO:0000296; GO:0000297; GO:0000329; GO:0005886; GO:0015297; GO:0055085; GO:0071944	TRUE	12
P38329	P38329	reviewed	VHC1_YEAST	Vacuolar cation-chloride cotransporter 1 (Vacuolar homolog of CCC family protein 1)	VHC1 YBR235W YBR1601	Saccharomyces cerevisiae (strain ATCC 204508 / S288c) (Baker's yeast)	1120	calcium ion transport [GO:0006816]; cell volume homeostasis [GO:0006884]; chloride ion homeostasis [GO:0055064]; chloride transmembrane transport [GO:1902476]; potassium ion homeostasis [GO:0055075]; vacuolar transmembrane transport [GO:0034486]	fungal-type vacuole membrane [GO:0000329]; vacuolar membrane [GO:0005774]; vacuole-mitochondrion membrane contact site [GO:1990816]	fungal-type vacuole membrane [GO:0000329]; vacuolar membrane [GO:0005774]; vacuole-mitochondrion membrane contact site [GO:1990816]; potassium:chloride symporter activity [GO:0015379]; calcium ion transport [GO:0006816]; cell volume homeostasis [GO:0006884]; chloride ion homeostasis [GO:0055064]; chloride transmembrane transport [GO:1902476]; potassium ion homeostasis [GO:0055075]; vacuolar trans…	SUBCELLULAR LOCATION: Vacuole membrane {ECO:0000269|PubMed:23022132}; Multi-pass membrane protein {ECO:0000255}.	TRANSMEM 63..83; /note="Helical; Name=1"; /evidence="ECO:0000255"; TRANSMEM 86..106; /note="Helical; Name=2"; /evidence="ECO:0000255"; TRANSMEM 146..166; /note="Helical; Name=3"; /evidence="ECO:0000255"; TRANSMEM 194..214; /note="Helical; Name=4"; /evidence="ECO:0000255"; TRANSMEM 222..242; /note="Helical; Name=5"; /evidence="ECO:0000255"; TRANSMEM 284..304; /note="Helical; Name=6"; /evidence="EC…	TOPO_DOM 1..62; /note="Cytoplasmic"; /evidence="ECO:0000305|PubMed:16847258"; TOPO_DOM 84..85; /note="Vacuolar"; /evidence="ECO:0000305|PubMed:16847258"; TOPO_DOM 107..145; /note="Cytoplasmic"; /evidence="ECO:0000305|PubMed:16847258"; TOPO_DOM 167..193; /note="Vacuolar"; /evidence="ECO:0000305|PubMed:16847258"; TOPO_DOM 215..221; /note="Cytoplasmic"; /evidence="ECO:0000305|PubMed:16847258"; TOPO_…	potassium:chloride symporter activity [GO:0015379]	GO:0000329; GO:0005774; GO:0006816; GO:0006884; GO:0015379; GO:0034486; GO:0055064; GO:0055075; GO:1902476; GO:1990816	TRUE	12
P53388	P53388	reviewed	DIP5_YEAST	Dicarboxylic amino acid permease	DIP5 YPL265W	Saccharomyces cerevisiae (strain ATCC 204508 / S288c) (Baker's yeast)	608	amino acid transmembrane transport [GO:0003333]; amino acid transport [GO:0006865]	cell periphery [GO:0071944]; fungal-type vacuole [GO:0000324]; fungal-type vacuole membrane [GO:0000329]; plasma membrane [GO:0005886]	cell periphery [GO:0071944]; fungal-type vacuole [GO:0000324]; fungal-type vacuole membrane [GO:0000329]; plasma membrane [GO:0005886]; amino acid transmembrane transporter activity [GO:0015171]; dicarboxylic acid transmembrane transporter activity [GO:0005310]; amino acid transmembrane transport [GO:0003333]; amino acid transport [GO:0006865]	SUBCELLULAR LOCATION: Membrane; Multi-pass membrane protein.	TRANSMEM 91..111; /note="Helical"; /evidence="ECO:0000255"; TRANSMEM 120..142; /note="Helical"; /evidence="ECO:0000255"; TRANSMEM 157..177; /note="Helical"; /evidence="ECO:0000255"; TRANSMEM 202..222; /note="Helical"; /evidence="ECO:0000255"; TRANSMEM 232..252; /note="Helical"; /evidence="ECO:0000255"; TRANSMEM 286..306; /note="Helical"; /evidence="ECO:0000255"; TRANSMEM 323..343; /note="Helical"…	TOPO_DOM 1..90; /note="Cytoplasmic"; /evidence="ECO:0000255"; TOPO_DOM 112..119; /note="Extracellular"; /evidence="ECO:0000255"; TOPO_DOM 143..156; /note="Cytoplasmic"; /evidence="ECO:0000255"; TOPO_DOM 178..201; /note="Extracellular"; /evidence="ECO:0000255"; TOPO_DOM 223..231; /note="Cytoplasmic"; /evidence="ECO:0000255"; TOPO_DOM 253..285; /note="Extracellular"; /evidence="ECO:0000255"; TOPO_D…	amino acid transmembrane transporter activity [GO:0015171]; dicarboxylic acid transmembrane transporter activity [GO:0005310]	GO:0000324; GO:0000329; GO:0003333; GO:0005310; GO:0005886; GO:0006865; GO:0015171; GO:0071944	TRUE	12
P25360	P25360	reviewed	PHO87_YEAST	Inorganic phosphate transporter PHO87	PHO87 YCR037C YCR37C YCR524	Saccharomyces cerevisiae (strain ATCC 204508 / S288c) (Baker's yeast)	923	phosphate ion transport [GO:0006817]; plasma membrane selenite transport [GO:0097080]; polyphosphate metabolic process [GO:0006797]; regulation of phosphate transmembrane transport [GO:2000185]	cell periphery [GO:0071944]; plasma membrane [GO:0005886]	cell periphery [GO:0071944]; plasma membrane [GO:0005886]; inorganic phosphate transmembrane transporter activity [GO:0005315]; phosphate ion transport [GO:0006817]; plasma membrane selenite transport [GO:0097080]; polyphosphate metabolic process [GO:0006797]; regulation of phosphate transmembrane transport [GO:2000185]	SUBCELLULAR LOCATION: Membrane; Multi-pass membrane protein.	TRANSMEM 462..482; /note="Helical"; /evidence="ECO:0000255"; TRANSMEM 494..514; /note="Helical"; /evidence="ECO:0000255"; TRANSMEM 538..558; /note="Helical"; /evidence="ECO:0000255"; TRANSMEM 584..604; /note="Helical"; /evidence="ECO:0000255"; TRANSMEM 628..648; /note="Helical"; /evidence="ECO:0000255"; TRANSMEM 668..688; /note="Helical"; /evidence="ECO:0000255"; TRANSMEM 708..728; /note="Helical…	TOPO_DOM 1..461; /note="Extracellular"; /evidence="ECO:0000255"; TOPO_DOM 483..493; /note="Cytoplasmic"; /evidence="ECO:0000255"; TOPO_DOM 515..537; /note="Extracellular"; /evidence="ECO:0000255"; TOPO_DOM 559..583; /note="Cytoplasmic"; /evidence="ECO:0000255"; TOPO_DOM 605..627; /note="Extracellular"; /evidence="ECO:0000255"; TOPO_DOM 649..667; /note="Cytoplasmic"; /evidence="ECO:0000255"; TOPO_…	inorganic phosphate transmembrane transporter activity [GO:0005315]	GO:0005315; GO:0005886; GO:0006797; GO:0006817; GO:0071944; GO:0097080; GO:2000185	TRUE	12
Q08986	Q08986	reviewed	SAM3_YEAST	S-adenosylmethionine permease SAM3 (S-adenosylmethionine metabolism protein 3)	SAM3 YPL274W	Saccharomyces cerevisiae (strain ATCC 204508 / S288c) (Baker's yeast)	587	amino acid transmembrane transport [GO:0003333]; putrescine transport [GO:0015847]; S-adenosyl-L-methionine transport [GO:0015805]; spermidine transport [GO:0015848]	endoplasmic reticulum [GO:0005783]; plasma membrane [GO:0005886]	endoplasmic reticulum [GO:0005783]; plasma membrane [GO:0005886]; amino acid transmembrane transporter activity [GO:0015171]; putrescine transmembrane transporter activity [GO:0015489]; S-adenosyl-L-methionine transmembrane transporter activity [GO:0000095]; spermidine transmembrane transporter activity [GO:0015606]; amino acid transmembrane transport [GO:0003333]; putrescine transport [GO:001584…	SUBCELLULAR LOCATION: Membrane {ECO:0000269|PubMed:14562095}; Multi-pass membrane protein {ECO:0000269|PubMed:14562095}. Endoplasmic reticulum {ECO:0000269|PubMed:14562095}.	TRANSMEM 81..103; /note="Helical"; /evidence="ECO:0000255"; TRANSMEM 110..129; /note="Helical"; /evidence="ECO:0000255"; TRANSMEM 163..183; /note="Helical"; /evidence="ECO:0000255"; TRANSMEM 187..207; /note="Helical"; /evidence="ECO:0000255"; TRANSMEM 220..240; /note="Helical"; /evidence="ECO:0000255"; TRANSMEM 267..287; /note="Helical"; /evidence="ECO:0000255"; TRANSMEM 303..323; /note="Helical"…	TOPO_DOM 1..80; /note="Cytoplasmic"; /evidence="ECO:0000255"; TOPO_DOM 104..109; /note="Extracellular"; /evidence="ECO:0000255"; TOPO_DOM 130..162; /note="Cytoplasmic"; /evidence="ECO:0000255"; TOPO_DOM 184..186; /note="Extracellular"; /evidence="ECO:0000255"; TOPO_DOM 208..219; /note="Cytoplasmic"; /evidence="ECO:0000255"; TOPO_DOM 241..266; /note="Extracellular"; /evidence="ECO:0000255"; TOPO_D…	amino acid transmembrane transporter activity [GO:0015171]; putrescine transmembrane transporter activity [GO:0015489]; S-adenosyl-L-methionine transmembrane transporter activity [GO:0000095]; spermidine transmembrane transporter activity [GO:0015606]	GO:0000095; GO:0003333; GO:0005783; GO:0005886; GO:0015171; GO:0015489; GO:0015606; GO:0015805; GO:0015847; GO:0015848	TRUE	12
Q12372	Q12372	reviewed	MMP1_YEAST	S-methylmethionine permease 1	MMP1 YLL061W L0555	Saccharomyces cerevisiae (strain ATCC 204508 / S288c) (Baker's yeast)	583	amino acid transmembrane transport [GO:0003333]; S-methylmethionine transport [GO:0015806]	cell periphery [GO:0071944]; endoplasmic reticulum [GO:0005783]; plasma membrane [GO:0005886]	cell periphery [GO:0071944]; endoplasmic reticulum [GO:0005783]; plasma membrane [GO:0005886]; amino acid transmembrane transporter activity [GO:0015171]; S-methylmethionine transmembrane transporter activity [GO:0000100]; amino acid transmembrane transport [GO:0003333]; S-methylmethionine transport [GO:0015806]	SUBCELLULAR LOCATION: Membrane {ECO:0000269|PubMed:14562095}; Multi-pass membrane protein {ECO:0000269|PubMed:14562095}. Endoplasmic reticulum {ECO:0000269|PubMed:14562095}.	TRANSMEM 78..96; /note="Helical"; /evidence="ECO:0000255"; TRANSMEM 102..123; /note="Helical"; /evidence="ECO:0000255"; TRANSMEM 144..164; /note="Helical"; /evidence="ECO:0000255"; TRANSMEM 183..203; /note="Helical"; /evidence="ECO:0000255"; TRANSMEM 216..236; /note="Helical"; /evidence="ECO:0000255"; TRANSMEM 255..274; /note="Helical"; /evidence="ECO:0000255"; TRANSMEM 299..319; /note="Helical";…	TOPO_DOM 1..77; /note="Cytoplasmic"; /evidence="ECO:0000255"; TOPO_DOM 97..101; /note="Extracellular"; /evidence="ECO:0000255"; TOPO_DOM 124..143; /note="Cytoplasmic"; /evidence="ECO:0000255"; TOPO_DOM 165..182; /note="Extracellular"; /evidence="ECO:0000255"; TOPO_DOM 204..215; /note="Cytoplasmic"; /evidence="ECO:0000255"; TOPO_DOM 237..254; /note="Extracellular"; /evidence="ECO:0000255"; TOPO_DO…	amino acid transmembrane transporter activity [GO:0015171]; S-methylmethionine transmembrane transporter activity [GO:0000100]	GO:0000100; GO:0003333; GO:0005783; GO:0005886; GO:0015171; GO:0015806; GO:0071944	TRUE	12
P36062	P36062	reviewed	AVT3_YEAST	Vacuolar amino acid transporter 3	AVT3 YKL146W YKL600	Saccharomyces cerevisiae (strain ATCC 204508 / S288c) (Baker's yeast)	692	amino acid transmembrane export from vacuole [GO:0032974]; amino acid transmembrane transport [GO:0003333]; proline transport [GO:0015824]	fungal-type vacuole [GO:0000324]; fungal-type vacuole membrane [GO:0000329]; vacuolar membrane [GO:0005774]	fungal-type vacuole [GO:0000324]; fungal-type vacuole membrane [GO:0000329]; vacuolar membrane [GO:0005774]; L-glutamine transmembrane transporter activity [GO:0015186]; L-isoleucine transmembrane transporter activity [GO:0015188]; L-tyrosine transmembrane transporter activity [GO:0005302]; amino acid transmembrane export from vacuole [GO:0032974]; amino acid transmembrane transport [GO:0003333];…	SUBCELLULAR LOCATION: Vacuole membrane {ECO:0000269|PubMed:11274162}; Multi-pass membrane protein {ECO:0000269|PubMed:11274162}.	TRANSMEM 302..322; /note="Helical"; /evidence="ECO:0000255"; TRANSMEM 329..349; /note="Helical"; /evidence="ECO:0000255"; TRANSMEM 374..394; /note="Helical"; /evidence="ECO:0000255"; TRANSMEM 412..432; /note="Helical"; /evidence="ECO:0000255"; TRANSMEM 443..463; /note="Helical"; /evidence="ECO:0000255"; TRANSMEM 483..503; /note="Helical"; /evidence="ECO:0000255"; TRANSMEM 519..539; /note="Helical…		L-glutamine transmembrane transporter activity [GO:0015186]; L-isoleucine transmembrane transporter activity [GO:0015188]; L-tyrosine transmembrane transporter activity [GO:0005302]	GO:0000324; GO:0000329; GO:0003333; GO:0005302; GO:0005774; GO:0015186; GO:0015188; GO:0015824; GO:0032974	TRUE	11
P05374	P05374	reviewed	CHO2_YEAST	Phosphatidylethanolamine N-methyltransferase (PE methyltransferase) (PEAMT) (PEMT) (EC 2.1.1.17) (Choline-requiring protein 2)	CHO2 PEM1 YGR157W G6673	Saccharomyces cerevisiae (strain ATCC 204508 / S288c) (Baker's yeast)	869	methylation [GO:0032259]; phosphatidylcholine biosynthetic process [GO:0006656]	cell periphery [GO:0071944]; endoplasmic reticulum [GO:0005783]; endoplasmic reticulum membrane [GO:0005789]	cell periphery [GO:0071944]; endoplasmic reticulum [GO:0005783]; endoplasmic reticulum membrane [GO:0005789]; phosphatidylethanolamine N-methyltransferase activity [GO:0004608]; methylation [GO:0032259]; phosphatidylcholine biosynthetic process [GO:0006656]	SUBCELLULAR LOCATION: Endoplasmic reticulum membrane {ECO:0000255|HAMAP-Rule:MF_03217, ECO:0000269|PubMed:14562095}; Multi-pass membrane protein {ECO:0000255|HAMAP-Rule:MF_03217}.	TRANSMEM 56..76; /note="Helical"; /evidence="ECO:0000255|HAMAP-Rule:MF_03217"; TRANSMEM 87..107; /note="Helical"; /evidence="ECO:0000255|HAMAP-Rule:MF_03217"; TRANSMEM 188..208; /note="Helical"; /evidence="ECO:0000255|HAMAP-Rule:MF_03217"; TRANSMEM 213..233; /note="Helical"; /evidence="ECO:0000255|HAMAP-Rule:MF_03217"; TRANSMEM 259..279; /note="Helical"; /evidence="ECO:0000255|HAMAP-Rule:MF_03217…	TOPO_DOM 2..55; /note="Lumenal"; /evidence="ECO:0000255|HAMAP-Rule:MF_03217, ECO:0000305|PubMed:16847258"; TOPO_DOM 77..86; /note="Cytoplasmic"; /evidence="ECO:0000255|HAMAP-Rule:MF_03217, ECO:0000305|PubMed:16847258"; TOPO_DOM 108..187; /note="Lumenal"; /evidence="ECO:0000255|HAMAP-Rule:MF_03217, ECO:0000305|PubMed:16847258"; TOPO_DOM 209..212; /note="Cytoplasmic"; /evidence="ECO:0000255|HAMAP-R…	phosphatidylethanolamine N-methyltransferase activity [GO:0004608]	GO:0004608; GO:0005783; GO:0005789; GO:0006656; GO:0032259; GO:0071944	TRUE	11
P53121	P53121	reviewed	FLC3_YEAST	Putative flavin carrier protein 3 (FAD transporter 3) (TRP-like ion channel FLC3)	FLC3 YGL139W G2812	Saccharomyces cerevisiae (strain ATCC 204508 / S288c) (Baker's yeast)	802	FAD transport [GO:0015883]; fungal-type cell wall biogenesis [GO:0009272]; sphingolipid biosynthetic process [GO:0030148]; transmembrane transport [GO:0055085]	endoplasmic reticulum [GO:0005783]; endoplasmic reticulum membrane [GO:0005789]; mitochondrion [GO:0005739]	endoplasmic reticulum [GO:0005783]; endoplasmic reticulum membrane [GO:0005789]; mitochondrion [GO:0005739]; FAD transmembrane transporter activity [GO:0015230]; FAD transport [GO:0015883]; fungal-type cell wall biogenesis [GO:0009272]; sphingolipid biosynthetic process [GO:0030148]; transmembrane transport [GO:0055085]	SUBCELLULAR LOCATION: Endoplasmic reticulum membrane {ECO:0000269|PubMed:16717099}; Multi-pass membrane protein {ECO:0000269|PubMed:16717099}.	TRANSMEM 170..190; /note="Helical"; /evidence="ECO:0000255"; TRANSMEM 201..221; /note="Helical"; /evidence="ECO:0000255"; TRANSMEM 230..250; /note="Helical"; /evidence="ECO:0000255"; TRANSMEM 256..278; /note="Helical"; /evidence="ECO:0000255"; TRANSMEM 324..344; /note="Helical"; /evidence="ECO:0000255"; TRANSMEM 378..398; /note="Helical"; /evidence="ECO:0000255"; TRANSMEM 406..426; /note="Helical…	TOPO_DOM 29..169; /note="Lumenal"; /evidence="ECO:0000255"; TOPO_DOM 191..200; /note="Cytoplasmic"; /evidence="ECO:0000255"; TOPO_DOM 222..229; /note="Lumenal"; /evidence="ECO:0000255"; TOPO_DOM 251..255; /note="Cytoplasmic"; /evidence="ECO:0000255"; TOPO_DOM 279..323; /note="Lumenal"; /evidence="ECO:0000255"; TOPO_DOM 345..377; /note="Cytoplasmic"; /evidence="ECO:0000255"; TOPO_DOM 399..405; /no…	FAD transmembrane transporter activity [GO:0015230]	GO:0005739; GO:0005783; GO:0005789; GO:0009272; GO:0015230; GO:0015883; GO:0030148; GO:0055085	TRUE	11
Q07660	Q07660	reviewed	BRE4_YEAST	Protein BRE4 (Brefeldin A-sensitivity protein 4)	BRE4 YDL231C	Saccharomyces cerevisiae (strain ATCC 204508 / S288c) (Baker's yeast)	1125	endocytosis [GO:0006897]; protein transport [GO:0015031]	cell periphery [GO:0071944]; membrane [GO:0016020]	cell periphery [GO:0071944]; membrane [GO:0016020]; endocytosis [GO:0006897]; protein transport [GO:0015031]	SUBCELLULAR LOCATION: Membrane {ECO:0000305}; Multi-pass membrane protein {ECO:0000305}.	TRANSMEM 144..164; /note="Helical"; /evidence="ECO:0000255"; TRANSMEM 177..194; /note="Helical"; /evidence="ECO:0000255"; TRANSMEM 199..219; /note="Helical"; /evidence="ECO:0000255"; TRANSMEM 228..248; /note="Helical"; /evidence="ECO:0000255"; TRANSMEM 255..275; /note="Helical"; /evidence="ECO:0000255"; TRANSMEM 285..305; /note="Helical"; /evidence="ECO:0000255"; TRANSMEM 707..727; /note="Helical…	TOPO_DOM 1..143; /note="Cytoplasmic"; /evidence="ECO:0000255"; TOPO_DOM 165..176; /note="Extracellular"; /evidence="ECO:0000255"; TOPO_DOM 195..198; /note="Cytoplasmic"; /evidence="ECO:0000255"; TOPO_DOM 220..227; /note="Extracellular"; /evidence="ECO:0000255"; TOPO_DOM 249..254; /note="Cytoplasmic"; /evidence="ECO:0000255"; TOPO_DOM 276..284; /note="Extracellular"; /evidence="ECO:0000255"; TOPO_…		GO:0006897; GO:0015031; GO:0016020; GO:0071944	TRUE	10
P35206	P35206	reviewed	CSG2_YEAST	Mannosyl phosphorylinositol ceramide synthase regulatory protein CSG2	CSG2 CLS2 YBR036C YBR0404	Saccharomyces cerevisiae (strain ATCC 204508 / S288c) (Baker's yeast)	410	glycosphingolipid biosynthetic process [GO:0006688]; intracellular calcium ion homeostasis [GO:0006874]; mannosyl diphosphorylinositol ceramide metabolic process [GO:0006676]	endoplasmic reticulum [GO:0005783]; endoplasmic reticulum membrane [GO:0005789]; fungal-type vacuole [GO:0000324]; Golgi apparatus [GO:0005794]; mannosyltransferase complex [GO:0031501]	endoplasmic reticulum [GO:0005783]; endoplasmic reticulum membrane [GO:0005789]; fungal-type vacuole [GO:0000324]; Golgi apparatus [GO:0005794]; mannosyltransferase complex [GO:0031501]; enzyme regulator activity [GO:0030234]; glycosphingolipid biosynthetic process [GO:0006688]; intracellular calcium ion homeostasis [GO:0006874]; mannosyl diphosphorylinositol ceramide metabolic process [GO:000667…	SUBCELLULAR LOCATION: Endoplasmic reticulum membrane {ECO:0000269|PubMed:7854312}; Multi-pass membrane protein {ECO:0000269|PubMed:7854312}.	TRANSMEM 51..71; /note="Helical"; /evidence="ECO:0000255"; TRANSMEM 142..161; /note="Helical"; /evidence="ECO:0000255"; TRANSMEM 168..187; /note="Helical"; /evidence="ECO:0000255"; TRANSMEM 198..217; /note="Helical"; /evidence="ECO:0000255"; TRANSMEM 246..265; /note="Helical"; /evidence="ECO:0000255"; TRANSMEM 286..305; /note="Helical"; /evidence="ECO:0000255"; TRANSMEM 325..344; /note="Helical";…	TOPO_DOM 18..50; /note="Lumenal"; /evidence="ECO:0000255"; TOPO_DOM 72..141; /note="Cytoplasmic"; /evidence="ECO:0000255"; TOPO_DOM 162..167; /note="Lumenal"; /evidence="ECO:0000255"; TOPO_DOM 188..197; /note="Cytoplasmic"; /evidence="ECO:0000255"; TOPO_DOM 218..245; /note="Lumenal"; /evidence="ECO:0000255"; TOPO_DOM 266..285; /note="Cytoplasmic"; /evidence="ECO:0000255"; TOPO_DOM 306..324; /note…	enzyme regulator activity [GO:0030234]	GO:0000324; GO:0005783; GO:0005789; GO:0005794; GO:0006676; GO:0006688; GO:0006874; GO:0030234; GO:0031501	TRUE	9
Q04562	Q04562	reviewed	TMN2_YEAST	Transmembrane 9 superfamily member 2	TMN2 YDR107C	Saccharomyces cerevisiae (strain ATCC 204508 / S288c) (Baker's yeast)	672	intracellular copper ion homeostasis [GO:0006878]; invasive growth in response to glucose limitation [GO:0001403]; monoatomic ion transport [GO:0006811]; protein localization to membrane [GO:0072657]; pseudohyphal growth [GO:0007124]; vacuolar transport [GO:0007034]	endosome [GO:0005768]; fungal-type vacuole membrane [GO:0000329]	endosome [GO:0005768]; fungal-type vacuole membrane [GO:0000329]; intracellular copper ion homeostasis [GO:0006878]; invasive growth in response to glucose limitation [GO:0001403]; monoatomic ion transport [GO:0006811]; protein localization to membrane [GO:0072657]; pseudohyphal growth [GO:0007124]; vacuolar transport [GO:0007034]	SUBCELLULAR LOCATION: Vacuole membrane; Multi-pass membrane protein.	TRANSMEM 308..328; /note="Helical"; /evidence="ECO:0000255"; TRANSMEM 384..404; /note="Helical"; /evidence="ECO:0000255"; TRANSMEM 411..431; /note="Helical"; /evidence="ECO:0000255"; TRANSMEM 448..468; /note="Helical"; /evidence="ECO:0000255"; TRANSMEM 480..500; /note="Helical"; /evidence="ECO:0000255"; TRANSMEM 533..553; /note="Helical"; /evidence="ECO:0000255"; TRANSMEM 566..586; /note="Helical…	TOPO_DOM 19..307; /note="Extracellular"; /evidence="ECO:0000255"; TOPO_DOM 329..383; /note="Cytoplasmic"; /evidence="ECO:0000255"; TOPO_DOM 405..410; /note="Extracellular"; /evidence="ECO:0000255"; TOPO_DOM 432..447; /note="Cytoplasmic"; /evidence="ECO:0000255"; TOPO_DOM 469..479; /note="Extracellular"; /evidence="ECO:0000255"; TOPO_DOM 501..532; /note="Cytoplasmic"; /evidence="ECO:0000255"; TOPO…		GO:0000329; GO:0001403; GO:0005768; GO:0006811; GO:0006878; GO:0007034; GO:0007124; GO:0072657	TRUE	9
P25639	P25639	reviewed	YCV1_YEAST	Uncharacterized membrane protein YCR061W	YCR061W YCR062W YCR61W YCR62W YCR904	Saccharomyces cerevisiae (strain ATCC 204508 / S288c) (Baker's yeast)	631	regulation of cell size [GO:0008361]	cytoplasm [GO:0005737]; membrane [GO:0016020]	cytoplasm [GO:0005737]; membrane [GO:0016020]; regulation of cell size [GO:0008361]	SUBCELLULAR LOCATION: Membrane {ECO:0000269|PubMed:14562095}; Multi-pass membrane protein {ECO:0000269|PubMed:14562095}. Note=Localizes to cytoplasmic punctate structures.	TRANSMEM 106..126; /note="Helical"; /evidence="ECO:0000255"; TRANSMEM 132..152; /note="Helical"; /evidence="ECO:0000255"; TRANSMEM 171..191; /note="Helical"; /evidence="ECO:0000255"; TRANSMEM 323..343; /note="Helical"; /evidence="ECO:0000255"; TRANSMEM 352..372; /note="Helical"; /evidence="ECO:0000255"; TRANSMEM 408..428; /note="Helical"; /evidence="ECO:0000255"; TRANSMEM 452..472; /note="Helical…	TOPO_DOM 21..105; /note="Lumenal"; /evidence="ECO:0000255"; TOPO_DOM 127..131; /note="Cytoplasmic"; /evidence="ECO:0000255"; TOPO_DOM 153..170; /note="Lumenal"; /evidence="ECO:0000255"; TOPO_DOM 192..322; /note="Cytoplasmic"; /evidence="ECO:0000255"; TOPO_DOM 344..351; /note="Lumenal"; /evidence="ECO:0000255"; TOPO_DOM 373..407; /note="Cytoplasmic"; /evidence="ECO:0000255"; TOPO_DOM 429..451; /no…		GO:0005737; GO:0008361; GO:0016020	TRUE	9
Q99252	Q99252	reviewed	ECM3_YEAST	Protein ECM3 (Extracellular mutant protein 3)	ECM3 YOR092W YOR3165W	Saccharomyces cerevisiae (strain ATCC 204508 / S288c) (Baker's yeast)	613	cell wall organization [GO:0071555]; transmembrane transport [GO:0055085]	cytoplasm [GO:0005737]; endoplasmic reticulum [GO:0005783]; endoplasmic reticulum membrane [GO:0005789]	cytoplasm [GO:0005737]; endoplasmic reticulum [GO:0005783]; endoplasmic reticulum membrane [GO:0005789]; cell wall organization [GO:0071555]; transmembrane transport [GO:0055085]	SUBCELLULAR LOCATION: Endoplasmic reticulum membrane {ECO:0000305}; Multi-pass membrane protein {ECO:0000305}.	TRANSMEM 10..30; /note="Helical"; /evidence="ECO:0000255"; TRANSMEM 74..94; /note="Helical"; /evidence="ECO:0000255"; TRANSMEM 106..126; /note="Helical"; /evidence="ECO:0000255"; TRANSMEM 143..163; /note="Helical"; /evidence="ECO:0000255"; TRANSMEM 432..452; /note="Helical"; /evidence="ECO:0000255"; TRANSMEM 471..491; /note="Helical"; /evidence="ECO:0000255"; TRANSMEM 546..566; /note="Helical"; /…			GO:0005737; GO:0005783; GO:0005789; GO:0055085; GO:0071555	TRUE	8
P08004	P08004	reviewed	CHS1_YEAST	Chitin synthase 1 (EC 2.4.1.16) (Chitin-UDP acetyl-glucosaminyl transferase 1)	CHS1 YNL192W N1404	Saccharomyces cerevisiae (strain ATCC 204508 / S288c) (Baker's yeast)	1131	cell wall chitin biosynthetic process [GO:0006038]; cell wall organization [GO:0071555]; septum digestion after cytokinesis [GO:0000920]	cell periphery [GO:0071944]; cell septum [GO:0030428]; chitosome [GO:0045009]; plasma membrane [GO:0005886]	cell periphery [GO:0071944]; cell septum [GO:0030428]; chitosome [GO:0045009]; plasma membrane [GO:0005886]; chitin synthase activity [GO:0004100]; cell wall chitin biosynthetic process [GO:0006038]; cell wall organization [GO:0071555]; septum digestion after cytokinesis [GO:0000920]	SUBCELLULAR LOCATION: Cell membrane {ECO:0000305|PubMed:2523889}; Multi-pass membrane protein {ECO:0000255}.	TRANSMEM 795..815; /note="Helical"; /evidence="ECO:0000255"; TRANSMEM 833..853; /note="Helical"; /evidence="ECO:0000255"; TRANSMEM 866..886; /note="Helical"; /evidence="ECO:0000255"; TRANSMEM 914..934; /note="Helical"; /evidence="ECO:0000255"; TRANSMEM 942..962; /note="Helical"; /evidence="ECO:0000255"; TRANSMEM 1042..1062; /note="Helical"; /evidence="ECO:0000255"; TRANSMEM 1101..1121; /note="Hel…		chitin synthase activity [GO:0004100]	GO:0000920; GO:0004100; GO:0005886; GO:0006038; GO:0030428; GO:0045009; GO:0071555; GO:0071944	TRUE	7
P38079	P38079	reviewed	YRO2_YEAST	Protein YRO2	YRO2 YBR054W YBR0507	Saccharomyces cerevisiae (strain ATCC 204508 / S288c) (Baker's yeast)	344		cellular bud [GO:0005933]; endoplasmic reticulum [GO:0005783]; mitochondrion [GO:0005739]; plasma membrane [GO:0005886]	cellular bud [GO:0005933]; endoplasmic reticulum [GO:0005783]; mitochondrion [GO:0005739]; plasma membrane [GO:0005886]	SUBCELLULAR LOCATION: Membrane; Multi-pass membrane protein.	TRANSMEM 35..55; /note="Helical"; /evidence="ECO:0000255"; TRANSMEM 63..83; /note="Helical"; /evidence="ECO:0000255"; TRANSMEM 120..140; /note="Helical"; /evidence="ECO:0000255"; TRANSMEM 142..162; /note="Helical"; /evidence="ECO:0000255"; TRANSMEM 173..193; /note="Helical"; /evidence="ECO:0000255"; TRANSMEM 203..223; /note="Helical"; /evidence="ECO:0000255"; TRANSMEM 239..259; /note="Helical"; /…	TOPO_DOM 1..34; /note="Extracellular"; /evidence="ECO:0000255"; TOPO_DOM 56..62; /note="Cytoplasmic"; /evidence="ECO:0000255"; TOPO_DOM 84..119; /note="Extracellular"; /evidence="ECO:0000255"; TOPO_DOM 141; /note="Cytoplasmic"; /evidence="ECO:0000255"; TOPO_DOM 163..172; /note="Extracellular"; /evidence="ECO:0000255"; TOPO_DOM 194..202; /note="Cytoplasmic"; /evidence="ECO:0000255"; TOPO_DOM 224..…		GO:0005739; GO:0005783; GO:0005886; GO:0005933	TRUE	7
P40988	P40988	reviewed	FET4_YEAST	Low-affinity Fe(2+) transport protein (Low-affinity Fe(II) transport protein)	FET4 YMR319C YM9924.11C	Saccharomyces cerevisiae (strain ATCC 204508 / S288c) (Baker's yeast)	552	copper ion import [GO:0015677]; iron ion transmembrane transport [GO:0034755]; protein maturation by copper ion transfer [GO:0015680]; zinc ion transport [GO:0006829]	cell periphery [GO:0071944]; fungal-type vacuole [GO:0000324]; plasma membrane [GO:0005886]	cell periphery [GO:0071944]; fungal-type vacuole [GO:0000324]; plasma membrane [GO:0005886]; copper ion transmembrane transporter activity [GO:0005375]; iron ion transmembrane transporter activity [GO:0005381]; copper ion import [GO:0015677]; iron ion transmembrane transport [GO:0034755]; protein maturation by copper ion transfer [GO:0015680]; zinc ion transport [GO:0006829]	SUBCELLULAR LOCATION: Membrane; Multi-pass membrane protein.	TRANSMEM 98..118; /note="Helical"; /evidence="ECO:0000255"; TRANSMEM 226..246; /note="Helical"; /evidence="ECO:0000255"; TRANSMEM 272..292; /note="Helical"; /evidence="ECO:0000255"; TRANSMEM 355..375; /note="Helical"; /evidence="ECO:0000255"; TRANSMEM 384..404; /note="Helical"; /evidence="ECO:0000255"; TRANSMEM 466..486; /note="Helical"; /evidence="ECO:0000255"; TRANSMEM 494..514; /note="Helical"…	TOPO_DOM 1..97; /note="Extracellular"; /evidence="ECO:0000255"; TOPO_DOM 119..225; /note="Cytoplasmic"; /evidence="ECO:0000255"; TOPO_DOM 247..271; /note="Extracellular"; /evidence="ECO:0000255"; TOPO_DOM 293..354; /note="Cytoplasmic"; /evidence="ECO:0000255"; TOPO_DOM 376..383; /note="Extracellular"; /evidence="ECO:0000255"; TOPO_DOM 405..465; /note="Cytoplasmic"; /evidence="ECO:0000255"; TOPO_D…	copper ion transmembrane transporter activity [GO:0005375]; iron ion transmembrane transporter activity [GO:0005381]	GO:0000324; GO:0005375; GO:0005381; GO:0005886; GO:0006829; GO:0015677; GO:0015680; GO:0034755; GO:0071944	TRUE	7
Q03218	Q03218	reviewed	MMT1_YEAST	Mitochondrial metal transporter 1	MMT1 MFT1 YMR177W YM8010.07	Saccharomyces cerevisiae (strain ATCC 204508 / S288c) (Baker's yeast)	510	intracellular iron ion homeostasis [GO:0006879]; iron ion transmembrane transport [GO:0034755]	membrane [GO:0016020]; mitochondrial membrane [GO:0031966]; mitochondrion [GO:0005739]	membrane [GO:0016020]; mitochondrial membrane [GO:0031966]; mitochondrion [GO:0005739]; monoatomic cation transmembrane transporter activity [GO:0008324]; intracellular iron ion homeostasis [GO:0006879]; iron ion transmembrane transport [GO:0034755]	SUBCELLULAR LOCATION: Mitochondrion membrane {ECO:0000269|PubMed:9353309}; Multi-pass membrane protein {ECO:0000269|PubMed:9353309}.	TRANSMEM 165..185; /note="Helical"; /evidence="ECO:0000255"; TRANSMEM 194..214; /note="Helical"; /evidence="ECO:0000255"; TRANSMEM 241..261; /note="Helical"; /evidence="ECO:0000255"; TRANSMEM 286..306; /note="Helical"; /evidence="ECO:0000255"; TRANSMEM 333..353; /note="Helical"; /evidence="ECO:0000255"; TRANSMEM 356..376; /note="Helical"; /evidence="ECO:0000255"		monoatomic cation transmembrane transporter activity [GO:0008324]	GO:0005739; GO:0006879; GO:0008324; GO:0016020; GO:0031966; GO:0034755	TRUE	6
Q06107	Q06107	reviewed	YP114_YEAST	Uncharacterized TLC domain-containing protein YPR114W	YPR114W	Saccharomyces cerevisiae (strain ATCC 204508 / S288c) (Baker's yeast)	315	lipid homeostasis [GO:0055088]	endoplasmic reticulum [GO:0005783]; endoplasmic reticulum membrane [GO:0005789]	endoplasmic reticulum [GO:0005783]; endoplasmic reticulum membrane [GO:0005789]; lipid homeostasis [GO:0055088]	SUBCELLULAR LOCATION: Endoplasmic reticulum membrane {ECO:0000269|PubMed:14562095}; Multi-pass membrane protein {ECO:0000269|PubMed:14562095}.	TRANSMEM 39..59; /note="Helical"; /evidence="ECO:0000255"; TRANSMEM 102..122; /note="Helical"; /evidence="ECO:0000255"; TRANSMEM 145..165; /note="Helical"; /evidence="ECO:0000255"; TRANSMEM 171..190; /note="Helical"; /evidence="ECO:0000255"; TRANSMEM 226..246; /note="Helical"; /evidence="ECO:0000255"; TRANSMEM 265..285; /note="Helical"; /evidence="ECO:0000255"	TOPO_DOM 1..38; /note="Cytoplasmic"; /evidence="ECO:0000255"; TOPO_DOM 60..101; /note="Lumenal"; /evidence="ECO:0000255"; TOPO_DOM 123..144; /note="Cytoplasmic"; /evidence="ECO:0000255"; TOPO_DOM 166..170; /note="Lumenal"; /evidence="ECO:0000255"; TOPO_DOM 191..225; /note="Cytoplasmic"; /evidence="ECO:0000255"; TOPO_DOM 247..264; /note="Lumenal"; /evidence="ECO:0000255"; TOPO_DOM 286..315; /note=…		GO:0005783; GO:0005789; GO:0055088	TRUE	6
Q05521	Q05521	reviewed	DPP1_YEAST	Diacylglycerol pyrophosphate phosphatase 1 (DGPP phosphatase) (EC 3.6.1.75) (Lysophosphatidate phosphatase) (EC 3.1.3.106) (Phosphatidate phosphatase) (EC 3.1.3.4)	DPP1 ZRG1 YDR284C	Saccharomyces cerevisiae (strain ATCC 204508 / S288c) (Baker's yeast)	289	phospholipid metabolic process [GO:0006644]	fungal-type vacuole membrane [GO:0000329]	fungal-type vacuole membrane [GO:0000329]; diacylglycerol diphosphate phosphatase activity [GO:0000810]; identical protein binding [GO:0042802]; phosphatidate phosphatase activity [GO:0008195]; phospholipid metabolic process [GO:0006644]	SUBCELLULAR LOCATION: Vacuole membrane {ECO:0000269|PubMed:11139591, ECO:0000269|PubMed:14562095, ECO:0000269|PubMed:8567632}; Multi-pass membrane protein {ECO:0000269|PubMed:11139591, ECO:0000269|PubMed:14562095, ECO:0000269|PubMed:8567632}.	TRANSMEM 22..42; /note="Helical; Name=1"; /evidence="ECO:0000255"; TRANSMEM 66..86; /note="Helical; Name=2"; /evidence="ECO:0000255"; TRANSMEM 93..113; /note="Helical; Name=3"; /evidence="ECO:0000255"; TRANSMEM 173..193; /note="Helical; Name=4"; /evidence="ECO:0000255"; TRANSMEM 194..214; /note="Helical; Name=5"; /evidence="ECO:0000255"; TRANSMEM 223..243; /note="Helical; Name=6"; /evidence="ECO:…	TOPO_DOM 1..21; /note="Vacuolar"; /evidence="ECO:0000255"; TOPO_DOM 43..65; /note="Cytoplasmic"; /evidence="ECO:0000255"; TOPO_DOM 87..92; /note="Vacuolar"; /evidence="ECO:0000255"; TOPO_DOM 114..172; /note="Cytoplasmic"; /evidence="ECO:0000255"; TOPO_DOM 215..222; /note="Cytoplasmic"; /evidence="ECO:0000255"; TOPO_DOM 244..289; /note="Vacuolar"; /evidence="ECO:0000255"	diacylglycerol diphosphate phosphatase activity [GO:0000810]; identical protein binding [GO:0042802]; phosphatidate phosphatase activity [GO:0008195]	GO:0000329; GO:0000810; GO:0006644; GO:0008195; GO:0042802	TRUE	6
P33303	P33303	reviewed	SFC1_YEAST	Succinate/fumarate mitochondrial transporter (Regulator of acetyl-CoA synthase activity)	SFC1 ACR1 YJR095W J1921	Saccharomyces cerevisiae (strain ATCC 204508 / S288c) (Baker's yeast)	322	fumarate transport [GO:0015741]; succinate transport [GO:0015744]	mitochondrial inner membrane [GO:0005743]; mitochondrion [GO:0005739]	mitochondrial inner membrane [GO:0005743]; mitochondrion [GO:0005739]; succinate:fumarate antiporter activity [GO:0005469]; fumarate transport [GO:0015741]; succinate transport [GO:0015744]	SUBCELLULAR LOCATION: Mitochondrion inner membrane; Multi-pass membrane protein.	TRANSMEM 11..31; /note="Helical; Name=1"; /evidence="ECO:0000255"; TRANSMEM 68..88; /note="Helical; Name=2"; /evidence="ECO:0000255"; TRANSMEM 114..134; /note="Helical; Name=3"; /evidence="ECO:0000255"; TRANSMEM 177..193; /note="Helical; Name=4"; /evidence="ECO:0000255"; TRANSMEM 219..235; /note="Helical; Name=5"; /evidence="ECO:0000255"; TRANSMEM 278..295; /note="Helical; Name=6"; /evidence="ECO…		succinate:fumarate antiporter activity [GO:0005469]	GO:0005469; GO:0005739; GO:0005743; GO:0015741; GO:0015744	TRUE	6
Q04013	Q04013	reviewed	YHM2_YEAST	Citrate/oxoglutarate carrier protein (Coc1p) (Mitochondrial DNA replication protein YHM2)	YHM2 YMR241W YM9408.03	Saccharomyces cerevisiae (strain ATCC 204508 / S288c) (Baker's yeast)	314	alpha-ketoglutarate transport [GO:0015742]; mitochondrial citrate transmembrane transport [GO:0006843]; mitochondrial genome maintenance [GO:0000002]; tricarboxylic acid transport [GO:0006842]	mitochondrial inner membrane [GO:0005743]; mitochondrial nucleoid [GO:0042645]; mitochondrion [GO:0005739]	mitochondrial inner membrane [GO:0005743]; mitochondrial nucleoid [GO:0042645]; mitochondrion [GO:0005739]; DNA binding [GO:0003677]; tricarboxylate secondary active transmembrane transporter activity [GO:0005371]; alpha-ketoglutarate transport [GO:0015742]; mitochondrial citrate transmembrane transport [GO:0006843]; mitochondrial genome maintenance [GO:0000002]; tricarboxylic acid transport [GO:…	SUBCELLULAR LOCATION: Mitochondrion inner membrane {ECO:0000269|PubMed:14562095, ECO:0000269|PubMed:14576278, ECO:0000269|PubMed:20371607, ECO:0000269|PubMed:9742088}; Multi-pass membrane protein {ECO:0000269|PubMed:14562095, ECO:0000269|PubMed:14576278, ECO:0000269|PubMed:20371607, ECO:0000269|PubMed:9742088}. Mitochondrion matrix, mitochondrion nucleoid {ECO:0000269|PubMed:9742088}.	TRANSMEM 23..44; /note="Helical; Name=1"; /evidence="ECO:0000255"; TRANSMEM 77..97; /note="Helical; Name=2"; /evidence="ECO:0000255"; TRANSMEM 111..127; /note="Helical; Name=3"; /evidence="ECO:0000255"; TRANSMEM 178..198; /note="Helical; Name=4"; /evidence="ECO:0000255"; TRANSMEM 218..238; /note="Helical; Name=5"; /evidence="ECO:0000255"; TRANSMEM 273..294; /note="Helical; Name=6"; /evidence="ECO…		DNA binding [GO:0003677]; tricarboxylate secondary active transmembrane transporter activity [GO:0005371]	GO:0000002; GO:0003677; GO:0005371; GO:0005739; GO:0005743; GO:0006842; GO:0006843; GO:0015742; GO:0042645	TRUE	6
P38988	P38988	reviewed	GGC1_YEAST	Mitochondrial GTP/GDP carrier protein 1	GGC1 SHM1 YHM1 YDL198C D1214	Saccharomyces cerevisiae (strain ATCC 204508 / S288c) (Baker's yeast)	300	guanine nucleotide transport [GO:0001408]; intracellular iron ion homeostasis [GO:0006879]; mitochondrial genome maintenance [GO:0000002]; transmembrane transport [GO:0055085]	mitochondrial inner membrane [GO:0005743]; mitochondrion [GO:0005739]	mitochondrial inner membrane [GO:0005743]; mitochondrion [GO:0005739]; guanine nucleotide transmembrane transporter activity [GO:0001409]; guanine nucleotide transport [GO:0001408]; intracellular iron ion homeostasis [GO:0006879]; mitochondrial genome maintenance [GO:0000002]; transmembrane transport [GO:0055085]	SUBCELLULAR LOCATION: Mitochondrion inner membrane {ECO:0000269|PubMed:14576278}; Multi-pass membrane protein {ECO:0000269|PubMed:14576278}.	TRANSMEM 14..34; /note="Helical; Name=1"; /evidence="ECO:0000255"; TRANSMEM 85..101; /note="Helical; Name=2"; /evidence="ECO:0000255"; TRANSMEM 122..142; /note="Helical; Name=3"; /evidence="ECO:0000255"; TRANSMEM 173..189; /note="Helical; Name=4"; /evidence="ECO:0000255"; TRANSMEM 214..234; /note="Helical; Name=5"; /evidence="ECO:0000255"; TRANSMEM 268..285; /note="Helical; Name=6"; /evidence="EC…		guanine nucleotide transmembrane transporter activity [GO:0001409]	GO:0000002; GO:0001408; GO:0001409; GO:0005739; GO:0005743; GO:0006879; GO:0055085	TRUE	6
P20107	P20107	reviewed	ZRC1_YEAST	Vacuolar zinc transporter ZRC1 (Zinc resistance conferring protein 1) (Zinc/cadmium resistance protein ZRC1)	ZRC1 YMR243C YM9408.05C	Saccharomyces cerevisiae (strain ATCC 204508 / S288c) (Baker's yeast)	442	intracellular zinc ion homeostasis [GO:0006882]; response to cadmium ion [GO:0046686]; zinc ion transmembrane transport [GO:0071577]	fungal-type vacuole [GO:0000324]; fungal-type vacuole membrane [GO:0000329]	fungal-type vacuole [GO:0000324]; fungal-type vacuole membrane [GO:0000329]; zinc ion transmembrane transporter activity [GO:0005385]; intracellular zinc ion homeostasis [GO:0006882]; response to cadmium ion [GO:0046686]; zinc ion transmembrane transport [GO:0071577]	SUBCELLULAR LOCATION: Vacuole membrane {ECO:0000269|PubMed:11263974, ECO:0000269|PubMed:9712830}; Multi-pass membrane protein {ECO:0000255}.	TRANSMEM 9..29; /note="Helical"; /evidence="ECO:0000255"; TRANSMEM 33..53; /note="Helical"; /evidence="ECO:0000255"; TRANSMEM 76..96; /note="Helical"; /evidence="ECO:0000255"; TRANSMEM 113..133; /note="Helical"; /evidence="ECO:0000255"; TRANSMEM 236..256; /note="Helical"; /evidence="ECO:0000255"; TRANSMEM 266..286; /note="Helical"; /evidence="ECO:0000255"	TOPO_DOM 1..8; /note="Cytoplasmic"; /evidence="ECO:0000305"; TOPO_DOM 30..32; /note="Vacuolar"; /evidence="ECO:0000305"; TOPO_DOM 54..75; /note="Cytoplasmic"; /evidence="ECO:0000305"; TOPO_DOM 97..112; /note="Vacuolar"; /evidence="ECO:0000305"; TOPO_DOM 134..235; /note="Cytoplasmic"; /evidence="ECO:0000305"; TOPO_DOM 257..265; /note="Vacuolar"; /evidence="ECO:0000305"; TOPO_DOM 287..442; /note="C…	zinc ion transmembrane transporter activity [GO:0005385]	GO:0000324; GO:0000329; GO:0005385; GO:0006882; GO:0046686; GO:0071577	TRUE	6
P38992	P38992	reviewed	SUR2_YEAST	Sphingolipid C4-hydroxylase SUR2 (EC 1.-.-.-) (Syringomycin response protein 2)	SUR2 SYR2 YDR297W D9740.8	Saccharomyces cerevisiae (strain ATCC 204508 / S288c) (Baker's yeast)	349	sphingolipid biosynthetic process [GO:0030148]; sphingolipid metabolic process [GO:0006665]	endoplasmic reticulum membrane [GO:0005789]	endoplasmic reticulum membrane [GO:0005789]; iron ion binding [GO:0005506]; sphingolipid delta-4 desaturase activity [GO:0042284]; sphingosine hydroxylase activity [GO:0000170]; sphingolipid biosynthetic process [GO:0030148]; sphingolipid metabolic process [GO:0006665]	SUBCELLULAR LOCATION: Endoplasmic reticulum membrane {ECO:0000269|PubMed:8868422}; Multi-pass membrane protein {ECO:0000305}.	TRANSMEM 9..29; /note="Helical"; /evidence="ECO:0000255"; TRANSMEM 50..70; /note="Helical"; /evidence="ECO:0000255"; TRANSMEM 99..119; /note="Helical"; /evidence="ECO:0000255"; TRANSMEM 148..168; /note="Helical"; /evidence="ECO:0000255"; TRANSMEM 209..229; /note="Helical"; /evidence="ECO:0000255"		iron ion binding [GO:0005506]; sphingolipid delta-4 desaturase activity [GO:0042284]; sphingosine hydroxylase activity [GO:0000170]	GO:0000170; GO:0005506; GO:0005789; GO:0006665; GO:0030148; GO:0042284	TRUE	5
P23900	P23900	reviewed	FPS1_YEAST	Glycerol uptake/efflux facilitator protein	FPS1 YLL043W	Saccharomyces cerevisiae (strain ATCC 204508 / S288c) (Baker's yeast)	669	acetate transport [GO:0006846]; arsenite transport [GO:0015700]; conjugation with cellular fusion [GO:0000747]; glycerol metabolic process [GO:0006071]; glycerol transmembrane transport [GO:0015793]; polyol transmembrane transport [GO:0015791]; water transport [GO:0006833]	cell periphery [GO:0071944]; cytoplasm [GO:0005737]; fungal-type vacuole [GO:0000324]; plasma membrane [GO:0005886]	cell periphery [GO:0071944]; cytoplasm [GO:0005737]; fungal-type vacuole [GO:0000324]; plasma membrane [GO:0005886]; glycerol channel activity [GO:0015254]; glycerol transmembrane transporter activity [GO:0015168]; water channel activity [GO:0015250]; acetate transport [GO:0006846]; arsenite transport [GO:0015700]; conjugation with cellular fusion [GO:0000747]; glycerol metabolic process [GO:0006…	SUBCELLULAR LOCATION: Membrane {ECO:0000305}; Multi-pass membrane protein {ECO:0000305}.	TRANSMEM 255..275; /note="Helical"; /evidence="ECO:0000255"; TRANSMEM 326..346; /note="Helical"; /evidence="ECO:0000255"; TRANSMEM 370..390; /note="Helical"; /evidence="ECO:0000255"; TRANSMEM 447..467; /note="Helical"; /evidence="ECO:0000255"; TRANSMEM 507..527; /note="Helical"; /evidence="ECO:0000255"	TOPO_DOM 1..254; /note="Extracellular"; /evidence="ECO:0000255"; TOPO_DOM 276..325; /note="Cytoplasmic"; /evidence="ECO:0000255"; TOPO_DOM 347..369; /note="Extracellular"; /evidence="ECO:0000255"; TOPO_DOM 391..446; /note="Cytoplasmic"; /evidence="ECO:0000255"; TOPO_DOM 468..506; /note="Extracellular"; /evidence="ECO:0000255"; TOPO_DOM 528..669; /note="Cytoplasmic"; /evidence="ECO:0000255"	glycerol channel activity [GO:0015254]; glycerol transmembrane transporter activity [GO:0015168]; water channel activity [GO:0015250]	GO:0000324; GO:0000747; GO:0005737; GO:0005886; GO:0006071; GO:0006833; GO:0006846; GO:0015168; GO:0015250; GO:0015254; GO:0015700; GO:0015791; GO:0015793; GO:0071944	TRUE	5
Q03713	Q03713	reviewed	RCF1_YEAST	Respiratory supercomplex factor 1, mitochondrial (Altered inheritance of mitochondria protein 31)	RCF1 AIM31 YML030W	Saccharomyces cerevisiae (strain ATCC 204508 / S288c) (Baker's yeast)	159	mitochondrial cytochrome c oxidase assembly [GO:0033617]; mitochondrial respirasome assembly [GO:0097250]; regulation of proton transport [GO:0010155]	mitochondrial inner membrane [GO:0005743]; mitochondrial respirasome [GO:0005746]; mitochondrion [GO:0005739]	mitochondrial inner membrane [GO:0005743]; mitochondrial respirasome [GO:0005746]; mitochondrion [GO:0005739]; mitochondrial cytochrome c oxidase assembly [GO:0033617]; mitochondrial respirasome assembly [GO:0097250]; regulation of proton transport [GO:0010155]	SUBCELLULAR LOCATION: Mitochondrion membrane {ECO:0000255|PROSITE-ProRule:PRU00836, ECO:0000269|PubMed:14562095, ECO:0000269|PubMed:14576278}; Multi-pass membrane protein {ECO:0000255|PROSITE-ProRule:PRU00836, ECO:0000269|PubMed:14562095, ECO:0000269|PubMed:14576278}.	TRANSMEM 14..30; /note="Helical; Name=1"; /evidence="ECO:0000269|PubMed:29507228"; TRANSMEM 36..57; /note="Helical; Name=2"; /evidence="ECO:0000269|PubMed:29507228"; TRANSMEM 64..85; /note="Helical; Name=3"; /evidence="ECO:0000269|PubMed:29507228"; TRANSMEM 89..106; /note="Helical; Name=4"; /evidence="ECO:0000269|PubMed:29507228"; TRANSMEM 134..156; /note="Helical; Name=5"; /evidence="ECO:0000269…	TOPO_DOM 1..13; /note="Mitochondrial intermembrane"; /evidence="ECO:0000305|PubMed:29507228"; TOPO_DOM 31..35; /note="Mitochondrial matrix"; /evidence="ECO:0000305|PubMed:29507228"; TOPO_DOM 58..63; /note="Mitochondrial intermembrane"; /evidence="ECO:0000305|PubMed:29507228"; TOPO_DOM 86..88; /note="Mitochondrial matrix"; /evidence="ECO:0000305|PubMed:29507228"; TOPO_DOM 107..133; /note="Mitochon…		GO:0005739; GO:0005743; GO:0005746; GO:0010155; GO:0033617; GO:0097250	TRUE	5
P39952	P39952	reviewed	OXA1_YEAST	Mitochondrial inner membrane protein OXA1 (Cytochrome oxidase biogenesis protein OXA1) (Oxidase assembly protein 1)	OXA1 PET1402 YER154W	Saccharomyces cerevisiae (strain ATCC 204508 / S288c) (Baker's yeast)	402	mitochondrial proton-transporting ATP synthase complex assembly [GO:0033615]; protein insertion into mitochondrial inner membrane [GO:0045039]; protein insertion into mitochondrial inner membrane from matrix [GO:0032979]	mitochondrial crista [GO:0030061]; mitochondrial inner boundary membrane [GO:0097002]; mitochondrion [GO:0005739]	mitochondrial crista [GO:0030061]; mitochondrial inner boundary membrane [GO:0097002]; mitochondrion [GO:0005739]; membrane insertase activity [GO:0032977]; mitochondrial ribosome binding [GO:0097177]; mitochondrial proton-transporting ATP synthase complex assembly [GO:0033615]; protein insertion into mitochondrial inner membrane [GO:0045039]; protein insertion into mitochondrial inner membrane f…	SUBCELLULAR LOCATION: Mitochondrion inner membrane {ECO:0000269|PubMed:22513091, ECO:0000269|PubMed:9171337}; Multi-pass membrane protein {ECO:0000269|PubMed:9171337}. Note=The availability of nuclear- and mitochondrial-encoded substrates influences the inner- membrane distribution. {ECO:0000269|PubMed:22513091}.	TRANSMEM 119..139; /note="Helical"; /evidence="ECO:0000255"; TRANSMEM 200..220; /note="Helical"; /evidence="ECO:0000255"; TRANSMEM 240..260; /note="Helical"; /evidence="ECO:0000255"; TRANSMEM 276..292; /note="Helical"; /evidence="ECO:0000255"; TRANSMEM 298..316; /note="Helical"; /evidence="ECO:0000255"	TOPO_DOM 43..118; /note="Mitochondrial intermembrane"; /evidence="ECO:0000269|PubMed:9171337"; TOPO_DOM 140..199; /note="Mitochondrial matrix"; /evidence="ECO:0000305"; TOPO_DOM 221..239; /note="Mitochondrial intermembrane"; /evidence="ECO:0000305"; TOPO_DOM 261..275; /note="Mitochondrial matrix"; /evidence="ECO:0000305"; TOPO_DOM 293..297; /note="Mitochondrial intermembrane"; /evidence="ECO:0000…	membrane insertase activity [GO:0032977]; mitochondrial ribosome binding [GO:0097177]	GO:0005739; GO:0030061; GO:0032977; GO:0032979; GO:0033615; GO:0045039; GO:0097002; GO:0097177	TRUE	5
Q06991	Q06991	reviewed	PUN1_YEAST	Protein PUN1 (Plasma membrane protein up-regulated during nitrogen stress 1)	PUN1 YLR414C	Saccharomyces cerevisiae (strain ATCC 204508 / S288c) (Baker's yeast)	263	fungal-type cell wall organization [GO:0031505]	cell cortex of cell tip [GO:0051285]; cell periphery [GO:0071944]; cellular bud [GO:0005933]; cytoplasm [GO:0005737]; endoplasmic reticulum [GO:0005783]; plasma membrane [GO:0005886]	cell cortex of cell tip [GO:0051285]; cell periphery [GO:0071944]; cellular bud [GO:0005933]; cytoplasm [GO:0005737]; endoplasmic reticulum [GO:0005783]; plasma membrane [GO:0005886]; fungal-type cell wall organization [GO:0031505]	SUBCELLULAR LOCATION: Cell membrane {ECO:0000269|PubMed:14562095, ECO:0000269|PubMed:18799621, ECO:0000269|PubMed:20228058}; Multi-pass membrane protein {ECO:0000269|PubMed:14562095, ECO:0000269|PubMed:18799621, ECO:0000269|PubMed:20228058}. Note=Localizes to punctate patches in the plasma membrane that show extensive colocalization with SUR7.	TRANSMEM 7..27; /note="Helical"; /evidence="ECO:0000255"; TRANSMEM 144..164; /note="Helical"; /evidence="ECO:0000255"; TRANSMEM 173..193; /note="Helical"; /evidence="ECO:0000255"; TRANSMEM 224..244; /note="Helical"; /evidence="ECO:0000255"	TOPO_DOM 1..6; /note="Cytoplasmic"; /evidence="ECO:0000255"; TOPO_DOM 28..143; /note="Extracellular"; /evidence="ECO:0000255"; TOPO_DOM 165..172; /note="Cytoplasmic"; /evidence="ECO:0000255"; TOPO_DOM 194..223; /note="Extracellular"; /evidence="ECO:0000255"; TOPO_DOM 245..263; /note="Cytoplasmic"; /evidence="ECO:0000255"		GO:0005737; GO:0005783; GO:0005886; GO:0005933; GO:0031505; GO:0051285; GO:0071944	TRUE	4
P40502	P40502	reviewed	AIM19_YEAST	Altered inheritance of mitochondria protein 19, mitochondrial	AIM19 YIL087C	Saccharomyces cerevisiae (strain ATCC 204508 / S288c) (Baker's yeast)	157		mitochondrial membrane [GO:0031966]; mitochondrion [GO:0005739]	mitochondrial membrane [GO:0031966]; mitochondrion [GO:0005739]	SUBCELLULAR LOCATION: Mitochondrion membrane {ECO:0000269|PubMed:14562095, ECO:0000269|PubMed:14576278}; Multi-pass membrane protein {ECO:0000269|PubMed:14562095, ECO:0000269|PubMed:14576278}.	TRANSMEM 31..48; /note="Helical"; /evidence="ECO:0000255"; TRANSMEM 80..96; /note="Helical"; /evidence="ECO:0000255"; TRANSMEM 103..119; /note="Helical"; /evidence="ECO:0000255"; TRANSMEM 131..147; /note="Helical"; /evidence="ECO:0000255"			GO:0005739; GO:0031966	TRUE	4
P32842	P32842	reviewed	VATL2_YEAST	V-type proton ATPase subunit c' (V-ATPase subunit c') (Proteolipid protein VMA11) (Trifluoperazine resistance protein 3) (V-ATPase 16 kDa proteolipid subunit 2) (Vacuolar proton pump c' subunit)	VMA11 CLS9 TFP3 YPL234C P1064	Saccharomyces cerevisiae (strain ATCC 204508 / S288c) (Baker's yeast)	164	endosomal lumen acidification [GO:0048388]; Golgi lumen acidification [GO:0061795]; proton transmembrane transport [GO:1902600]; vacuolar acidification [GO:0007035]	cell periphery [GO:0071944]; fungal-type vacuole [GO:0000324]; fungal-type vacuole membrane [GO:0000329]; Golgi membrane [GO:0000139]; membrane [GO:0016020]; proton-transporting V-type ATPase complex [GO:0033176]; vacuolar proton-transporting V-type ATPase complex [GO:0016471]; vacuolar proton-transporting V-type ATPase, V0 domain [GO:0000220]	cell periphery [GO:0071944]; fungal-type vacuole [GO:0000324]; fungal-type vacuole membrane [GO:0000329]; Golgi membrane [GO:0000139]; membrane [GO:0016020]; proton-transporting V-type ATPase complex [GO:0033176]; vacuolar proton-transporting V-type ATPase complex [GO:0016471]; vacuolar proton-transporting V-type ATPase, V0 domain [GO:0000220]; proton-transporting ATPase activity, rotational mech…	SUBCELLULAR LOCATION: Vacuole membrane {ECO:0000269|PubMed:9030535}; Multi-pass membrane protein {ECO:0000255}.	TRANSMEM 15..37; /note="Helical"; /evidence="ECO:0000255"; TRANSMEM 60..80; /note="Helical"; /evidence="ECO:0000255"; TRANSMEM 99..120; /note="Helical"; /evidence="ECO:0000255"; TRANSMEM 133..158; /note="Helical"; /evidence="ECO:0000255"	TOPO_DOM 1..14; /note="Vacuolar"; /evidence="ECO:0000255"; TOPO_DOM 38..59; /note="Cytoplasmic"; /evidence="ECO:0000255"; TOPO_DOM 81..98; /note="Vacuolar"; /evidence="ECO:0000255"; TOPO_DOM 121..132; /note="Cytoplasmic"; /evidence="ECO:0000255"; TOPO_DOM 159..164; /note="Vacuolar"; /evidence="ECO:0000255"	proton-transporting ATPase activity, rotational mechanism [GO:0046961]	GO:0000139; GO:0000220; GO:0000324; GO:0000329; GO:0007035; GO:0016020; GO:0016471; GO:0033176; GO:0046961; GO:0048388; GO:0061795; GO:0071944; GO:1902600	TRUE	4
P38166	P38166	reviewed	SFT2_YEAST	Protein transport protein SFT2	SFT2 YBL102W YBL0812	Saccharomyces cerevisiae (strain ATCC 204508 / S288c) (Baker's yeast)	215	protein transport [GO:0015031]; retrograde transport, endosome to Golgi [GO:0042147]	cytosol [GO:0005829]; Golgi membrane [GO:0000139]; Golgi trans cisterna [GO:0000138]	cytosol [GO:0005829]; Golgi membrane [GO:0000139]; Golgi trans cisterna [GO:0000138]; protein transport [GO:0015031]; retrograde transport, endosome to Golgi [GO:0042147]	SUBCELLULAR LOCATION: Golgi apparatus membrane {ECO:0000269|PubMed:10406798}; Multi-pass membrane protein {ECO:0000269|PubMed:10406798}.	TRANSMEM 82..102; /note="Helical; Name=1"; /evidence="ECO:0000255"; TRANSMEM 112..132; /note="Helical; Name=2"; /evidence="ECO:0000255"; TRANSMEM 146..166; /note="Helical; Name=3"; /evidence="ECO:0000255"; TRANSMEM 173..193; /note="Helical; Name=4"; /evidence="ECO:0000255"	TOPO_DOM 2..81; /note="Cytoplasmic"; /evidence="ECO:0000255"; TOPO_DOM 103..111; /note="Lumenal"; /evidence="ECO:0000255"; TOPO_DOM 133..145; /note="Cytoplasmic"; /evidence="ECO:0000255"; TOPO_DOM 167..172; /note="Lumenal"; /evidence="ECO:0000255"; TOPO_DOM 194..215; /note="Cytoplasmic"; /evidence="ECO:0000255"		GO:0000138; GO:0000139; GO:0005829; GO:0015031; GO:0042147	TRUE	4
Q12207	Q12207	reviewed	NCE2_YEAST	Non-classical export protein 2	NCE102 NCE2 RTG2S2 YPR149W P9659.2	Saccharomyces cerevisiae (strain ATCC 204508 / S288c) (Baker's yeast)	173	eisosome assembly [GO:0070941]; negative regulation of protein phosphorylation [GO:0001933]; plasma membrane organization [GO:0007009]; protein localization to plasma membrane [GO:0072659]; protein secretion [GO:0009306]; regulation of fungal-type cell wall organization [GO:0060237]; regulation of phospholipid translocation [GO:0061091]	cell periphery [GO:0071944]; cellular bud membrane [GO:0033101]; cytoplasm [GO:0005737]; endoplasmic reticulum [GO:0005783]; mating projection membrane [GO:0070250]; membrane [GO:0016020]; mitochondrion [GO:0005739]; plasma membrane [GO:0005886]	cell periphery [GO:0071944]; cellular bud membrane [GO:0033101]; cytoplasm [GO:0005737]; endoplasmic reticulum [GO:0005783]; mating projection membrane [GO:0070250]; membrane [GO:0016020]; mitochondrion [GO:0005739]; plasma membrane [GO:0005886]; eisosome assembly [GO:0070941]; negative regulation of protein phosphorylation [GO:0001933]; plasma membrane organization [GO:0007009]; protein localiza…	SUBCELLULAR LOCATION: Cell membrane {ECO:0000269|PubMed:10716729, ECO:0000269|PubMed:12469340, ECO:0000269|PubMed:19064668, ECO:0000269|PubMed:19564405, ECO:0000269|PubMed:20581291}; Multi-pass membrane protein {ECO:0000269|PubMed:10716729, ECO:0000269|PubMed:12469340, ECO:0000269|PubMed:19064668, ECO:0000269|PubMed:19564405, ECO:0000269|PubMed:20581291}. Note=Associates with the ergosterol-rich …	TRANSMEM 11..30; /note="Helical"; /evidence="ECO:0000255"; TRANSMEM 38..62; /note="Helical"; /evidence="ECO:0000255"; TRANSMEM 76..93; /note="Helical"; /evidence="ECO:0000255"; TRANSMEM 138..157; /note="Helical"; /evidence="ECO:0000255"	TOPO_DOM 1..10; /note="Cytoplasmic"; /evidence="ECO:0000255"; TOPO_DOM 31..37; /note="Extracellular"; /evidence="ECO:0000255"; TOPO_DOM 63..75; /note="Cytoplasmic"; /evidence="ECO:0000255"; TOPO_DOM 94..137; /note="Extracellular"; /evidence="ECO:0000255"; TOPO_DOM 158..173; /note="Cytoplasmic"; /evidence="ECO:0000255"		GO:0001933; GO:0005737; GO:0005739; GO:0005783; GO:0005886; GO:0007009; GO:0009306; GO:0016020; GO:0033101; GO:0060237; GO:0061091; GO:0070250; GO:0070941; GO:0071944; GO:0072659	TRUE	4
P25515	P25515	reviewed	VATL1_YEAST	V-type proton ATPase subunit c (V-ATPase subunit c) (Guanine nucleotide exchange factor 2) (V-ATPase 16 kDa proteolipid subunit 1) (Vacuolar proton pump c subunit)	VMA3 CLS7 CUP5 GEF2 YEL027W	Saccharomyces cerevisiae (strain ATCC 204508 / S288c) (Baker's yeast)	160	endocytosis [GO:0006897]; endosomal lumen acidification [GO:0048388]; Golgi lumen acidification [GO:0061795]; intracellular copper ion homeostasis [GO:0006878]; intracellular iron ion homeostasis [GO:0006879]; protein targeting to vacuole [GO:0006623]; proton transmembrane transport [GO:1902600]; vacuolar acidification [GO:0007035]; vacuole organization [GO:0007033]	fungal-type vacuole membrane [GO:0000329]; Golgi membrane [GO:0000139]; membrane [GO:0016020]; proton-transporting V-type ATPase complex [GO:0033176]; vacuolar proton-transporting V-type ATPase complex [GO:0016471]; vacuolar proton-transporting V-type ATPase, V0 domain [GO:0000220]	fungal-type vacuole membrane [GO:0000329]; Golgi membrane [GO:0000139]; membrane [GO:0016020]; proton-transporting V-type ATPase complex [GO:0033176]; vacuolar proton-transporting V-type ATPase complex [GO:0016471]; vacuolar proton-transporting V-type ATPase, V0 domain [GO:0000220]; proton transmembrane transporter activity [GO:0015078]; proton-transporting ATPase activity, rotational mechanism […	SUBCELLULAR LOCATION: Vacuole membrane {ECO:0000269|PubMed:9030535}; Multi-pass membrane protein {ECO:0000255}.	TRANSMEM 9..31; /note="Helical"; /evidence="ECO:0000255"; TRANSMEM 54..74; /note="Helical"; /evidence="ECO:0000255"; TRANSMEM 91..112; /note="Helical"; /evidence="ECO:0000255"; TRANSMEM 125..150; /note="Helical"; /evidence="ECO:0000255"	TOPO_DOM 1..8; /note="Vacuolar"; /evidence="ECO:0000255"; TOPO_DOM 32..53; /note="Cytoplasmic"; /evidence="ECO:0000255"; TOPO_DOM 75..90; /note="Vacuolar"; /evidence="ECO:0000255"; TOPO_DOM 113..124; /note="Cytoplasmic"; /evidence="ECO:0000255"; TOPO_DOM 151..160; /note="Vacuolar"; /evidence="ECO:0000255"	proton transmembrane transporter activity [GO:0015078]; proton-transporting ATPase activity, rotational mechanism [GO:0046961]	GO:0000139; GO:0000220; GO:0000329; GO:0006623; GO:0006878; GO:0006879; GO:0006897; GO:0007033; GO:0007035; GO:0015078; GO:0016020; GO:0016471; GO:0033176; GO:0046961; GO:0048388; GO:0061795; GO:1902600	TRUE	4
Q03723	Q03723	reviewed	OST6_YEAST	Dolichyl-diphosphooligosaccharide--protein glycosyltransferase subunit OST6 (Oligosaccharyl transferase subunit OST6) (Oligosaccharyl transferase 37 kDa subunit) (OTase 37 kDa subunit)	OST6 YML019W	Saccharomyces cerevisiae (strain ATCC 204508 / S288c) (Baker's yeast)	332	protein N-linked glycosylation [GO:0006487]; protein N-linked glycosylation via asparagine [GO:0018279]; protein-containing complex assembly [GO:0065003]	endoplasmic reticulum [GO:0005783]; endoplasmic reticulum membrane [GO:0005789]; oligosaccharyltransferase complex [GO:0008250]	endoplasmic reticulum [GO:0005783]; endoplasmic reticulum membrane [GO:0005789]; oligosaccharyltransferase complex [GO:0008250]; protein-disulfide reductase activity [GO:0015035]; protein N-linked glycosylation [GO:0006487]; protein N-linked glycosylation via asparagine [GO:0018279]; protein-containing complex assembly [GO:0065003]	SUBCELLULAR LOCATION: Endoplasmic reticulum membrane {ECO:0000305}; Multi-pass membrane protein {ECO:0000255}.	TRANSMEM 189..209; /note="Helical"; /evidence="ECO:0000255"; TRANSMEM 217..237; /note="Helical"; /evidence="ECO:0000255"; TRANSMEM 268..288; /note="Helical"; /evidence="ECO:0000255"; TRANSMEM 303..323; /note="Helical"; /evidence="ECO:0000255"	TOPO_DOM 25..188; /note="Lumenal"; /evidence="ECO:0000305"; TOPO_DOM 210..216; /note="Cytoplasmic"; /evidence="ECO:0000305"; TOPO_DOM 238..267; /note="Lumenal"; /evidence="ECO:0000305"; TOPO_DOM 289..302; /note="Cytoplasmic"; /evidence="ECO:0000305"; TOPO_DOM 324..332; /note="Lumenal"; /evidence="ECO:0000305"	protein-disulfide reductase activity [GO:0015035]	GO:0005783; GO:0005789; GO:0006487; GO:0008250; GO:0015035; GO:0018279; GO:0065003	TRUE	4
P54003	P54003	reviewed	SUR7_YEAST	Protein SUR7	SUR7 YML052W YM9958.11	Saccharomyces cerevisiae (strain ATCC 204508 / S288c) (Baker's yeast)	302	ascospore formation [GO:0030437]; cortical actin cytoskeleton organization [GO:0030866]; endocytosis [GO:0006897]; fungal-type cell wall organization [GO:0031505]; protein localization to eisosome filament [GO:0097446]; septin cytoskeleton organization [GO:0032185]	cell cortex [GO:0005938]; cell periphery [GO:0071944]; eisosome [GO:0032126]; membrane raft [GO:0045121]; mitochondrion [GO:0005739]; plasma membrane [GO:0005886]	cell cortex [GO:0005938]; cell periphery [GO:0071944]; eisosome [GO:0032126]; membrane raft [GO:0045121]; mitochondrion [GO:0005739]; plasma membrane [GO:0005886]; ascospore formation [GO:0030437]; cortical actin cytoskeleton organization [GO:0030866]; endocytosis [GO:0006897]; fungal-type cell wall organization [GO:0031505]; protein localization to eisosome filament [GO:0097446]; septin cytoskel…	SUBCELLULAR LOCATION: Cell membrane {ECO:0000269|PubMed:11784867, ECO:0000269|PubMed:12469340, ECO:0000269|PubMed:14562095, ECO:0000269|PubMed:15536122, ECO:0000269|PubMed:16496001}; Multi-pass membrane protein {ECO:0000269|PubMed:11784867, ECO:0000269|PubMed:12469340, ECO:0000269|PubMed:14562095, ECO:0000269|PubMed:15536122, ECO:0000269|PubMed:16496001}. Note=Localizes at eisosomes, structures w…	TRANSMEM 11..31; /note="Helical"; /evidence="ECO:0000255"; TRANSMEM 115..135; /note="Helical"; /evidence="ECO:0000255"; TRANSMEM 146..166; /note="Helical"; /evidence="ECO:0000255"; TRANSMEM 190..210; /note="Helical"; /evidence="ECO:0000255"	TOPO_DOM 1..10; /note="Cytoplasmic"; /evidence="ECO:0000255"; TOPO_DOM 32..114; /note="Extracellular"; /evidence="ECO:0000255"; TOPO_DOM 136..145; /note="Cytoplasmic"; /evidence="ECO:0000255"; TOPO_DOM 167..189; /note="Extracellular"; /evidence="ECO:0000255"; TOPO_DOM 211..302; /note="Cytoplasmic"; /evidence="ECO:0000255"		GO:0005739; GO:0005886; GO:0005938; GO:0006897; GO:0030437; GO:0030866; GO:0031505; GO:0032126; GO:0032185; GO:0045121; GO:0071944; GO:0097446	TRUE	4
P38869	P38869	reviewed	SVP26_YEAST	Protein SVP26 (Sed5 compartment vesicle protein of 26 kDa)	SVP26 YHR181W	Saccharomyces cerevisiae (strain ATCC 204508 / S288c) (Baker's yeast)	228	endoplasmic reticulum to Golgi vesicle-mediated transport [GO:0006888]; fungal-type cell wall organization [GO:0031505]; protein retention in Golgi apparatus [GO:0045053]; protein transport [GO:0015031]	COPII-coated ER to Golgi transport vesicle [GO:0030134]; endoplasmic reticulum [GO:0005783]; endoplasmic reticulum membrane [GO:0005789]; Golgi membrane [GO:0000139]	COPII-coated ER to Golgi transport vesicle [GO:0030134]; endoplasmic reticulum [GO:0005783]; endoplasmic reticulum membrane [GO:0005789]; Golgi membrane [GO:0000139]; COPII receptor activity [GO:0097020]; endoplasmic reticulum to Golgi vesicle-mediated transport [GO:0006888]; fungal-type cell wall organization [GO:0031505]; protein retention in Golgi apparatus [GO:0045053]; protein transport [GO:…	SUBCELLULAR LOCATION: Golgi apparatus, cis-Golgi network membrane {ECO:0000269|PubMed:14562095, ECO:0000269|PubMed:16107716, ECO:0000269|PubMed:20236934}; Multi-pass membrane protein {ECO:0000269|PubMed:14562095, ECO:0000269|PubMed:16107716, ECO:0000269|PubMed:20236934}. Note=Early Golgi.	TRANSMEM 2..22; /note="Helical"; /evidence="ECO:0000255"; TRANSMEM 43..59; /note="Helical"; /evidence="ECO:0000255"; TRANSMEM 89..105; /note="Helical"; /evidence="ECO:0000255"; TRANSMEM 143..166; /note="Helical"; /evidence="ECO:0000255"	TOPO_DOM 1; /note="Cytoplasmic"; /evidence="ECO:0000255"; TOPO_DOM 23..42; /note="Lumenal"; /evidence="ECO:0000255"; TOPO_DOM 60..88; /note="Cytoplasmic"; /evidence="ECO:0000255"; TOPO_DOM 106..142; /note="Lumenal"; /evidence="ECO:0000255"; TOPO_DOM 167..228; /note="Cytoplasmic"; /evidence="ECO:0000255"	COPII receptor activity [GO:0097020]	GO:0000139; GO:0005783; GO:0005789; GO:0006888; GO:0015031; GO:0030134; GO:0031505; GO:0045053; GO:0097020	TRUE	4
P40073	P40073	reviewed	SHO1_YEAST	High osmolarity signaling protein SHO1 (Osmosensor SHO1) (Suppressor of SUA8-1 mutation) (Synthetic high osmolarity-sensitive protein 1)	SHO1 SSU81 YER118C	Saccharomyces cerevisiae (strain ATCC 204508 / S288c) (Baker's yeast)	367	establishment of cell polarity [GO:0030010]; mitotic cytokinetic process [GO:1902410]; osmosensory signaling pathway [GO:0007231]; regulation of actin filament polymerization [GO:0030833]; signal transduction involved in filamentous growth [GO:0001402]	cell periphery [GO:0071944]; cellular bud [GO:0005933]; cellular bud neck [GO:0005935]; endoplasmic reticulum [GO:0005783]; HICS complex [GO:0044697]; mating projection tip [GO:0043332]; membrane [GO:0016020]; plasma membrane [GO:0005886]	cell periphery [GO:0071944]; cellular bud [GO:0005933]; cellular bud neck [GO:0005935]; endoplasmic reticulum [GO:0005783]; HICS complex [GO:0044697]; mating projection tip [GO:0043332]; membrane [GO:0016020]; plasma membrane [GO:0005886]; MAP-kinase scaffold activity [GO:0005078]; osmosensor activity [GO:0005034]; establishment of cell polarity [GO:0030010]; mitotic cytokinetic process [GO:19024…	SUBCELLULAR LOCATION: Cell membrane; Multi-pass membrane protein. Bud. Bud neck. Cell projection. Note=Localizes at the tip of the mating projection during conjugation.	TRANSMEM 33..53; /note="Helical"; /evidence="ECO:0000255"; TRANSMEM 66..86; /note="Helical"; /evidence="ECO:0000255"; TRANSMEM 94..114; /note="Helical"; /evidence="ECO:0000255"; TRANSMEM 123..143; /note="Helical"; /evidence="ECO:0000255"	TOPO_DOM 1..32; /note="Cytoplasmic"; /evidence="ECO:0000255"; TOPO_DOM 54..65; /note="Extracellular"; /evidence="ECO:0000255"; TOPO_DOM 87..93; /note="Cytoplasmic"; /evidence="ECO:0000255"; TOPO_DOM 115..122; /note="Extracellular"; /evidence="ECO:0000255"; TOPO_DOM 144..367; /note="Cytoplasmic"; /evidence="ECO:0000255"	MAP-kinase scaffold activity [GO:0005078]; osmosensor activity [GO:0005034]	GO:0001402; GO:0005034; GO:0005078; GO:0005783; GO:0005886; GO:0005933; GO:0005935; GO:0007231; GO:0016020; GO:0030010; GO:0030833; GO:0043332; GO:0044697; GO:0071944; GO:1902410	TRUE	4
P53337	P53337	reviewed	ERV29_YEAST	ER-derived vesicles protein ERV29	ERV29 YGR284C	Saccharomyces cerevisiae (strain ATCC 204508 / S288c) (Baker's yeast)	310	endoplasmic reticulum to Golgi vesicle-mediated transport [GO:0006888]; Golgi organization [GO:0007030]	COPII-coated ER to Golgi transport vesicle [GO:0030134]; endoplasmic reticulum [GO:0005783]; endoplasmic reticulum membrane [GO:0005789]; endoplasmic reticulum-Golgi intermediate compartment [GO:0005793]	COPII-coated ER to Golgi transport vesicle [GO:0030134]; endoplasmic reticulum [GO:0005783]; endoplasmic reticulum membrane [GO:0005789]; endoplasmic reticulum-Golgi intermediate compartment [GO:0005793]; COPII receptor activity [GO:0097020]; endoplasmic reticulum to Golgi vesicle-mediated transport [GO:0006888]; Golgi organization [GO:0007030]	SUBCELLULAR LOCATION: Endoplasmic reticulum membrane {ECO:0000269|PubMed:11157978}; Multi-pass membrane protein {ECO:0000269|PubMed:11157978}.	TRANSMEM 109..129; /note="Helical"; /evidence="ECO:0000255"; TRANSMEM 138..158; /note="Helical"; /evidence="ECO:0000255"; TRANSMEM 210..230; /note="Helical"; /evidence="ECO:0000255"; TRANSMEM 246..266; /note="Helical"; /evidence="ECO:0000255"	TOPO_DOM 1..108; /note="Cytoplasmic"; /evidence="ECO:0000305|PubMed:17520482"; TOPO_DOM 130..137; /note="Lumenal"; /evidence="ECO:0000305|PubMed:17520482"; TOPO_DOM 159..209; /note="Cytoplasmic"; /evidence="ECO:0000305|PubMed:17520482"; TOPO_DOM 231..245; /note="Lumenal"; /evidence="ECO:0000305|PubMed:17520482"; TOPO_DOM 267..310; /note="Cytoplasmic"; /evidence="ECO:0000305|PubMed:17520482"	COPII receptor activity [GO:0097020]	GO:0005783; GO:0005789; GO:0005793; GO:0006888; GO:0007030; GO:0030134; GO:0097020	TRUE	4
P53173	P53173	reviewed	ERV14_YEAST	ER-derived vesicles protein ERV14	ERV14 YGL054C	Saccharomyces cerevisiae (strain ATCC 204508 / S288c) (Baker's yeast)	138	ascospore formation [GO:0030437]; axial cellular bud site selection [GO:0007120]; endoplasmic reticulum to Golgi vesicle-mediated transport [GO:0006888]; negative regulation of receptor localization to synapse [GO:1902684]; regulation of AMPA receptor activity [GO:2000311]	cell periphery [GO:0071944]; COPII-coated ER to Golgi transport vesicle [GO:0030134]; endoplasmic reticulum [GO:0005783]; endoplasmic reticulum membrane [GO:0005789]; Golgi membrane [GO:0000139]	cell periphery [GO:0071944]; COPII-coated ER to Golgi transport vesicle [GO:0030134]; endoplasmic reticulum [GO:0005783]; endoplasmic reticulum membrane [GO:0005789]; Golgi membrane [GO:0000139]; cargo receptor activity [GO:0038024]; ascospore formation [GO:0030437]; axial cellular bud site selection [GO:0007120]; endoplasmic reticulum to Golgi vesicle-mediated transport [GO:0006888]; negative re…	SUBCELLULAR LOCATION: Endoplasmic reticulum membrane; Multi-pass membrane protein. Golgi apparatus membrane; Multi-pass membrane protein. Note=Resides in the endoplasmic and Golgi compartments, and then packaged into endoplasmic reticulum derived vesicles.	TRANSMEM 7..27; /note="Helical"; /evidence="ECO:0000255"; TRANSMEM 53..73; /note="Helical"; /evidence="ECO:0000255"; TRANSMEM 112..132; /note="Helical"; /evidence="ECO:0000255"	TOPO_DOM 2..6; /note="Cytoplasmic"; /evidence="ECO:0000255"; TOPO_DOM 28..52; /note="Extracellular"; /evidence="ECO:0000255"; TOPO_DOM 74..111; /note="Cytoplasmic"; /evidence="ECO:0000255"; TOPO_DOM 133..138; /note="Extracellular"; /evidence="ECO:0000255"	cargo receptor activity [GO:0038024]	GO:0000139; GO:0005783; GO:0005789; GO:0006888; GO:0007120; GO:0030134; GO:0030437; GO:0038024; GO:0071944; GO:1902684; GO:2000311	TRUE	3
P40030	P40030	reviewed	ERG28_YEAST	Ergosterol biosynthetic protein 28	ERG28 BUD18 YER044C	Saccharomyces cerevisiae (strain ATCC 204508 / S288c) (Baker's yeast)	148	ergosterol biosynthetic process [GO:0006696]	endoplasmic reticulum [GO:0005783]; endoplasmic reticulum membrane [GO:0005789]	endoplasmic reticulum [GO:0005783]; endoplasmic reticulum membrane [GO:0005789]; protein-macromolecule adaptor activity [GO:0030674]; ergosterol biosynthetic process [GO:0006696]	SUBCELLULAR LOCATION: Endoplasmic reticulum membrane {ECO:0000305|PubMed:12119386}; Multi-pass membrane protein {ECO:0000305|PubMed:12119386}.	TRANSMEM 26..46; /note="Helical"; /evidence="ECO:0000255"; TRANSMEM 93..113; /note="Helical"; /evidence="ECO:0000255"; TRANSMEM 121..136; /note="Helical"; /evidence="ECO:0000255"	TOPO_DOM 1..25; /note="Cytoplasmic"; /evidence="ECO:0000255"; TOPO_DOM 47..92; /note="Lumenal"; /evidence="ECO:0000255"; TOPO_DOM 114..120; /note="Cytoplasmic"; /evidence="ECO:0000255"; TOPO_DOM 137..148; /note="Lumenal"; /evidence="ECO:0000255"	protein-macromolecule adaptor activity [GO:0030674]	GO:0005783; GO:0005789; GO:0006696; GO:0030674	TRUE	3
P38770	P38770	reviewed	BRL1_YEAST	Nucleus export protein BRL1 (BRR6-like protein 1)	BRL1 YHR036W	Saccharomyces cerevisiae (strain ATCC 204508 / S288c) (Baker's yeast)	471	lipid homeostasis [GO:0055088]; mRNA transport [GO:0051028]; nuclear envelope organization [GO:0006998]; protein transport [GO:0015031]	endoplasmic reticulum [GO:0005783]; membrane [GO:0016020]; nuclear envelope [GO:0005635]; nuclear membrane [GO:0031965]	endoplasmic reticulum [GO:0005783]; membrane [GO:0016020]; nuclear envelope [GO:0005635]; nuclear membrane [GO:0031965]; lipid homeostasis [GO:0055088]; mRNA transport [GO:0051028]; nuclear envelope organization [GO:0006998]; protein transport [GO:0015031]	SUBCELLULAR LOCATION: Nucleus membrane {ECO:0000269|PubMed:15882446}; Multi-pass membrane protein {ECO:0000269|PubMed:15882446}.	TRANSMEM 300..320; /note="Helical"; /evidence="ECO:0000255"; TRANSMEM 408..428; /note="Helical"; /evidence="ECO:0000255"	TOPO_DOM 1..299; /note="Cytoplasmic"; /evidence="ECO:0000255"; TOPO_DOM 321..407; /note="Perinuclear space"; /evidence="ECO:0000255"; TOPO_DOM 429..471; /note="Cytoplasmic"; /evidence="ECO:0000255"		GO:0005635; GO:0005783; GO:0006998; GO:0015031; GO:0016020; GO:0031965; GO:0051028; GO:0055088	TRUE	2
Q06170	Q06170	reviewed	YL326_YEAST	Uncharacterized membrane protein YLR326W	YLR326W	Saccharomyces cerevisiae (strain ATCC 204508 / S288c) (Baker's yeast)	240		cell periphery [GO:0071944]; membrane [GO:0016020]	cell periphery [GO:0071944]; membrane [GO:0016020]	SUBCELLULAR LOCATION: Membrane; Multi-pass membrane protein.	TRANSMEM 86..106; /note="Helical"; /evidence="ECO:0000255"; TRANSMEM 132..152; /note="Helical"; /evidence="ECO:0000255"	TOPO_DOM 1..85; /note="Cytoplasmic"; /evidence="ECO:0000255"; TOPO_DOM 107..131; /note="Extracellular"; /evidence="ECO:0000255"; TOPO_DOM 153..240; /note="Cytoplasmic"; /evidence="ECO:0000255"		GO:0016020; GO:0071944	TRUE	2
P53895	P53895	reviewed	ASI2_YEAST	Protein ASI2 (Amino acid sensor-independent protein 2)	ASI2 YNL159C N1735	Saccharomyces cerevisiae (strain ATCC 204508 / S288c) (Baker's yeast)	289	cellular response to amino acid stimulus [GO:0071230]; proteasome-mediated ubiquitin-dependent protein catabolic process [GO:0043161]; ubiquitin-dependent protein catabolic process [GO:0006511]	Asi complex [GO:0097658]; endoplasmic reticulum [GO:0005783]; nuclear inner membrane [GO:0005637]	Asi complex [GO:0097658]; endoplasmic reticulum [GO:0005783]; nuclear inner membrane [GO:0005637]; cellular response to amino acid stimulus [GO:0071230]; proteasome-mediated ubiquitin-dependent protein catabolic process [GO:0043161]; ubiquitin-dependent protein catabolic process [GO:0006511]	SUBCELLULAR LOCATION: Nucleus inner membrane {ECO:0000269|PubMed:17085444}; Multi-pass membrane protein {ECO:0000269|PubMed:17085444}.	TRANSMEM 223..243; /note="Helical"; /evidence="ECO:0000305|PubMed:17085444"; TRANSMEM 248..268; /note="Helical"; /evidence="ECO:0000305|PubMed:17085444"	TOPO_DOM 1..222; /note="Nuclear"; /evidence="ECO:0000269|PubMed:17085444"; TOPO_DOM 244..247; /note="Perinuclear space"; /evidence="ECO:0000269|PubMed:17085444"; TOPO_DOM 269..289; /note="Nuclear"; /evidence="ECO:0000269|PubMed:17085444"		GO:0005637; GO:0005783; GO:0006511; GO:0043161; GO:0071230; GO:0097658	TRUE	2
Q12066	Q12066	reviewed	NUR1_YEAST	Nuclear rim protein 1	NUR1 YDL089W D2416	Saccharomyces cerevisiae (strain ATCC 204508 / S288c) (Baker's yeast)	484	maintenance of rDNA [GO:0043007]; regulation of exit from mitosis [GO:0007096]	nuclear membrane [GO:0031965]; nuclear periphery [GO:0034399]	nuclear membrane [GO:0031965]; nuclear periphery [GO:0034399]; maintenance of rDNA [GO:0043007]; regulation of exit from mitosis [GO:0007096]	SUBCELLULAR LOCATION: Nucleus membrane {ECO:0000269|PubMed:14562095}; Multi-pass membrane protein {ECO:0000269|PubMed:14562095}.	TRANSMEM 145..165; /note="Helical"; /evidence="ECO:0000255"; TRANSMEM 252..272; /note="Helical"; /evidence="ECO:0000255"			GO:0007096; GO:0031965; GO:0034399; GO:0043007	TRUE	2
P32341	P32341	reviewed	VPH2_YEAST	Vacuolar ATPase assembly integral membrane protein VPH2 (Protein VMA12)	VPH2 CLS10 VMA12 YKL119C YKL520	Saccharomyces cerevisiae (strain ATCC 204508 / S288c) (Baker's yeast)	215	vacuolar acidification [GO:0007035]; vacuolar proton-transporting V-type ATPase complex assembly [GO:0070072]	endomembrane system [GO:0012505]; endoplasmic reticulum [GO:0005783]; endoplasmic reticulum membrane [GO:0005789]; Vma12-Vma22 assembly complex [GO:1990871]	endomembrane system [GO:0012505]; endoplasmic reticulum [GO:0005783]; endoplasmic reticulum membrane [GO:0005789]; Vma12-Vma22 assembly complex [GO:1990871]; vacuolar acidification [GO:0007035]; vacuolar proton-transporting V-type ATPase complex assembly [GO:0070072]	SUBCELLULAR LOCATION: Endoplasmic reticulum membrane {ECO:0000269|PubMed:9325326}; Multi-pass membrane protein {ECO:0000269|PubMed:9325326}.	TRANSMEM 135..155; /note="Helical"; /evidence="ECO:0000255"; TRANSMEM 168..186; /note="Helical"; /evidence="ECO:0000255"	TOPO_DOM 1..134; /note="Cytoplasmic"; /evidence="ECO:0000255"; TOPO_DOM 156..167; /note="Lumenal"; /evidence="ECO:0000255"; TOPO_DOM 187..215; /note="Cytoplasmic"; /evidence="ECO:0000255"		GO:0005783; GO:0005789; GO:0007035; GO:0012505; GO:0070072; GO:1990871	TRUE	2
Q06116	Q06116	reviewed	HOB2_YEAST	Protein YPR117W (Bridge-like lipid transfer protein family member 2B) (BLTP2B) (Protein hobbit 2) (HOB2)	HOB2 YPR117W	Saccharomyces cerevisiae (strain ATCC 204508 / S288c) (Baker's yeast)	2489		endoplasmic reticulum membrane [GO:0005789]; mitochondrial membrane [GO:0031966]; plasma membrane [GO:0005886]	endoplasmic reticulum membrane [GO:0005789]; mitochondrial membrane [GO:0031966]; plasma membrane [GO:0005886]	SUBCELLULAR LOCATION: Cell membrane {ECO:0000269|PubMed:35015055}; Multi-pass membrane protein {ECO:0000255}. Endoplasmic reticulum membrane {ECO:0000269|PubMed:35015055}; Multi-pass membrane protein {ECO:0000255}. Mitochondrion membrane {ECO:0000269|PubMed:35015055}; Multi-pass membrane protein {ECO:0000255}. Note=Localizes to endoplasmic reticulum-cell membrane and some endoplasmic reticulum-mi…	TRANSMEM 19..39; /note="Helical"; /evidence="ECO:0000255"; TRANSMEM 128..148; /note="Helical"; /evidence="ECO:0000255"			GO:0005789; GO:0005886; GO:0031966	TRUE	2
P40508	P40508	reviewed	PUP1_YEAST	PUP1 protein homolog	YIL077C	Saccharomyces cerevisiae (strain ATCC 204508 / S288c) (Baker's yeast)	320		mitochondrial membrane [GO:0031966]; mitochondrion [GO:0005739]	mitochondrial membrane [GO:0031966]; mitochondrion [GO:0005739]	SUBCELLULAR LOCATION: Mitochondrion membrane {ECO:0000269|PubMed:16823961}; Multi-pass membrane protein {ECO:0000255}.	TRANSMEM 66..85; /note="Helical"; /evidence="ECO:0000255"; TRANSMEM 100..119; /note="Helical"; /evidence="ECO:0000255"			GO:0005739; GO:0031966	TRUE	2
P39727	P39727	reviewed	ERV46_YEAST	ER-derived vesicles protein ERV46	ERV46 YAL042W FUN9	Saccharomyces cerevisiae (strain ATCC 204508 / S288c) (Baker's yeast)	415	endoplasmic reticulum to Golgi vesicle-mediated transport [GO:0006888]; protein transport [GO:0015031]; retrograde vesicle-mediated transport, Golgi to endoplasmic reticulum [GO:0006890]	COPII-coated ER to Golgi transport vesicle [GO:0030134]; endoplasmic reticulum [GO:0005783]; endoplasmic reticulum membrane [GO:0005789]; Golgi membrane [GO:0000139]; membrane [GO:0016020]; retrograde transporter complex, Golgi to ER [GO:0061852]	COPII-coated ER to Golgi transport vesicle [GO:0030134]; endoplasmic reticulum [GO:0005783]; endoplasmic reticulum membrane [GO:0005789]; Golgi membrane [GO:0000139]; membrane [GO:0016020]; retrograde transporter complex, Golgi to ER [GO:0061852]; endoplasmic reticulum to Golgi vesicle-mediated transport [GO:0006888]; protein transport [GO:0015031]; retrograde vesicle-mediated transport, Golgi to…	SUBCELLULAR LOCATION: Endoplasmic reticulum membrane; Multi-pass membrane protein. Golgi apparatus membrane; Multi-pass membrane protein. Note=Recycles between endoplasmic reticulum and Golgi. Resides in the endoplasmic and Golgi compartments, and then packaged into endoplasmic reticulum derived vesicles.	TRANSMEM 25..45; /note="Helical"; /evidence="ECO:0000255"; TRANSMEM 377..397; /note="Helical"; /evidence="ECO:0000255"	TOPO_DOM 1..24; /note="Cytoplasmic"; /evidence="ECO:0000255"; TOPO_DOM 46..376; /note="Lumenal"; /evidence="ECO:0000255"; TOPO_DOM 398..415; /note="Cytoplasmic"; /evidence="ECO:0000255"		GO:0000139; GO:0005783; GO:0005789; GO:0006888; GO:0006890; GO:0015031; GO:0016020; GO:0030134; GO:0061852	TRUE	2
P36147	P36147	reviewed	PAM17_YEAST	Presequence translocated-associated motor subunit PAM17, mitochondrial	PAM17 FMP18 YKR065C	Saccharomyces cerevisiae (strain ATCC 204508 / S288c) (Baker's yeast)	197	intracellular protein transport [GO:0006886]; protein import into mitochondrial matrix [GO:0030150]	mitochondrial inner membrane [GO:0005743]; mitochondrion [GO:0005739]; PAM complex, Tim23 associated import motor [GO:0001405]; TIM23 mitochondrial import inner membrane translocase complex [GO:0005744]	mitochondrial inner membrane [GO:0005743]; mitochondrion [GO:0005739]; PAM complex, Tim23 associated import motor [GO:0001405]; TIM23 mitochondrial import inner membrane translocase complex [GO:0005744]; intracellular protein transport [GO:0006886]; protein import into mitochondrial matrix [GO:0030150]	SUBCELLULAR LOCATION: Mitochondrion inner membrane {ECO:0000305}; Multi-pass membrane protein {ECO:0000305}.	TRANSMEM 64..84; /note="Helical"; /evidence="ECO:0000255"; TRANSMEM 103..123; /note="Helical"; /evidence="ECO:0000255"			GO:0001405; GO:0005739; GO:0005743; GO:0005744; GO:0006886; GO:0030150	TRUE	2
P32839	P32839	reviewed	BCS1_YEAST	Mitochondrial chaperone BCS1	BCS1 YDR375C D9481.17	Saccharomyces cerevisiae (strain ATCC 204508 / S288c) (Baker's yeast)	456	chaperone-mediated protein complex assembly [GO:0051131]; mitochondrial respiratory chain complex III assembly [GO:0034551]; protein insertion into mitochondrial inner membrane from matrix [GO:0032979]	cytosol [GO:0005829]; mitochondrial inner membrane [GO:0005743]; mitochondrial intermembrane space [GO:0005758]; mitochondrion [GO:0005739]	cytosol [GO:0005829]; mitochondrial inner membrane [GO:0005743]; mitochondrial intermembrane space [GO:0005758]; mitochondrion [GO:0005739]; ATP binding [GO:0005524]; ATP hydrolysis activity [GO:0016887]; ATPase-coupled transmembrane transporter activity [GO:0042626]; protein transmembrane transporter activity [GO:0008320]; chaperone-mediated protein complex assembly [GO:0051131]; mitochondrial r…	SUBCELLULAR LOCATION: Mitochondrion inner membrane; Single-pass membrane protein.	TRANSMEM 45..68; /note="Helical"; /evidence="ECO:0000305"	TOPO_DOM 1..44; /note="Mitochondrial intermembrane"; /evidence="ECO:0000305|PubMed:8599931"; TOPO_DOM 69..456; /note="Mitochondrial matrix"; /evidence="ECO:0000305|PubMed:8599931"	ATP binding [GO:0005524]; ATP hydrolysis activity [GO:0016887]; ATPase-coupled transmembrane transporter activity [GO:0042626]; protein transmembrane transporter activity [GO:0008320]	GO:0005524; GO:0005739; GO:0005743; GO:0005758; GO:0005829; GO:0008320; GO:0016887; GO:0032979; GO:0034551; GO:0042626; GO:0051131	TRUE	1
Q03691	Q03691	reviewed	ROT1_YEAST	Protein ROT1 (Reversal of TOR2 lethality protein 1)	ROT1 YMR200W YM8325.01	Saccharomyces cerevisiae (strain ATCC 204508 / S288c) (Baker's yeast)	256	'de novo' protein folding [GO:0006458]; budding cell apical bud growth [GO:0007118]; establishment or maintenance of actin cytoskeleton polarity [GO:0030950]; fungal-type cell wall biogenesis [GO:0009272]; protein folding [GO:0006457]; protein folding in endoplasmic reticulum [GO:0034975]; protein N-linked glycosylation [GO:0006487]; protein O-linked mannosylation [GO:0035269]	endoplasmic reticulum [GO:0005783]; endoplasmic reticulum membrane [GO:0005789]	endoplasmic reticulum [GO:0005783]; endoplasmic reticulum membrane [GO:0005789]; unfolded protein binding [GO:0051082]; 'de novo' protein folding [GO:0006458]; budding cell apical bud growth [GO:0007118]; establishment or maintenance of actin cytoskeleton polarity [GO:0030950]; fungal-type cell wall biogenesis [GO:0009272]; protein folding [GO:0006457]; protein folding in endoplasmic reticulum [G…	SUBCELLULAR LOCATION: Endoplasmic reticulum membrane {ECO:0000305|PubMed:14562095, ECO:0000305|PubMed:16567426, ECO:0000305|PubMed:17914748}; Single-pass type I membrane protein {ECO:0000305|PubMed:14562095, ECO:0000305|PubMed:16567426, ECO:0000305|PubMed:17914748}.	TRANSMEM 236..256; /note="Helical"; /evidence="ECO:0000255"	TOPO_DOM 25..235; /note="Lumenal"; /evidence="ECO:0000255"	unfolded protein binding [GO:0051082]	GO:0005783; GO:0005789; GO:0006457; GO:0006458; GO:0006487; GO:0007118; GO:0009272; GO:0030950; GO:0034975; GO:0035269; GO:0051082	TRUE	1
P15367	P15367	reviewed	SEC11_YEAST	Signal peptidase complex catalytic subunit SEC11 (EC 3.4.21.89) (Secretory protein 11) (Signal peptidase I)	SEC11 YIR022W	Saccharomyces cerevisiae (strain ATCC 204508 / S288c) (Baker's yeast)	167	protein targeting to ER [GO:0045047]; signal peptide processing [GO:0006465]	endoplasmic reticulum [GO:0005783]; endoplasmic reticulum membrane [GO:0005789]; signal peptidase complex [GO:0005787]	endoplasmic reticulum [GO:0005783]; endoplasmic reticulum membrane [GO:0005789]; signal peptidase complex [GO:0005787]; peptidase activity [GO:0008233]; serine-type endopeptidase activity [GO:0004252]; protein targeting to ER [GO:0045047]; signal peptide processing [GO:0006465]	SUBCELLULAR LOCATION: Endoplasmic reticulum membrane {ECO:0000269|PubMed:10206957, ECO:0000269|PubMed:14562095, ECO:0000269|PubMed:2644273}; Single-pass type II membrane protein {ECO:0000269|PubMed:10206957, ECO:0000269|PubMed:14562095, ECO:0000269|PubMed:2644273}.	TRANSMEM 10..31; /note="Helical; Signal-anchor for type II membrane protein"; /evidence="ECO:0000255"	TOPO_DOM 1..9; /note="Cytoplasmic"; /evidence="ECO:0000255"; TOPO_DOM 32..167; /note="Lumenal"; /evidence="ECO:0000255"	peptidase activity [GO:0008233]; serine-type endopeptidase activity [GO:0004252]	GO:0004252; GO:0005783; GO:0005787; GO:0005789; GO:0006465; GO:0008233; GO:0045047	TRUE	1
Q01590	Q01590	reviewed	SED5_YEAST	Integral membrane protein SED5	SED5 YLR026C	Saccharomyces cerevisiae (strain ATCC 204508 / S288c) (Baker's yeast)	340	endoplasmic reticulum to Golgi vesicle-mediated transport [GO:0006888]; intra-Golgi vesicle-mediated transport [GO:0006891]; intracellular protein transport [GO:0006886]; regulation of inclusion body assembly [GO:0090083]; vesicle docking [GO:0048278]; vesicle fusion [GO:0006906]; vesicle fusion with Golgi apparatus [GO:0048280]	cis-Golgi network [GO:0005801]; endomembrane system [GO:0012505]; endoplasmic reticulum membrane [GO:0005789]; Golgi cis cisterna membrane [GO:1990674]; Golgi membrane [GO:0000139]; membrane [GO:0016020]; SNARE complex [GO:0031201]	cis-Golgi network [GO:0005801]; endomembrane system [GO:0012505]; endoplasmic reticulum membrane [GO:0005789]; Golgi cis cisterna membrane [GO:1990674]; Golgi membrane [GO:0000139]; membrane [GO:0016020]; SNARE complex [GO:0031201]; SNAP receptor activity [GO:0005484]; SNARE binding [GO:0000149]; endoplasmic reticulum to Golgi vesicle-mediated transport [GO:0006888]; intra-Golgi vesicle-mediated …	SUBCELLULAR LOCATION: Membrane {ECO:0000305}; Single-pass type IV membrane protein {ECO:0000305}. Golgi apparatus membrane {ECO:0000305}; Single-pass type IV membrane protein {ECO:0000305}.	TRANSMEM 320..340; /note="Helical; Anchor for type IV membrane protein"; /evidence="ECO:0000255"	TOPO_DOM 1..319; /note="Cytoplasmic"; /evidence="ECO:0000255"	SNAP receptor activity [GO:0005484]; SNARE binding [GO:0000149]	GO:0000139; GO:0000149; GO:0005484; GO:0005789; GO:0005801; GO:0006886; GO:0006888; GO:0006891; GO:0006906; GO:0012505; GO:0016020; GO:0031201; GO:0048278; GO:0048280; GO:0090083; GO:1990674	TRUE	1
P39006	P39006	reviewed	PSD1_YEAST	Phosphatidylserine decarboxylase proenzyme 1, mitochondrial (EC 4.1.1.65) [Cleaved into: Phosphatidylserine decarboxylase 1 beta chain; Phosphatidylserine decarboxylase 1 alpha chain]	PSD1 YNL169C N1692	Saccharomyces cerevisiae (strain ATCC 204508 / S288c) (Baker's yeast)	500	mitochondrial electron transport, ubiquinol to cytochrome c [GO:0006122]; phosphatidylcholine biosynthetic process [GO:0006656]; phosphatidylethanolamine biosynthetic process [GO:0006646]; positive regulation of mitochondrial fusion [GO:0010636]; positive regulation of protein processing [GO:0010954]; protein autoprocessing [GO:0016540]	endoplasmic reticulum membrane [GO:0005789]; lipid droplet [GO:0005811]; mitochondrial inner membrane [GO:0005743]; mitochondrion [GO:0005739]	endoplasmic reticulum membrane [GO:0005789]; lipid droplet [GO:0005811]; mitochondrial inner membrane [GO:0005743]; mitochondrion [GO:0005739]; phosphatidylserine decarboxylase activity [GO:0004609]; mitochondrial electron transport, ubiquinol to cytochrome c [GO:0006122]; phosphatidylcholine biosynthetic process [GO:0006656]; phosphatidylethanolamine biosynthetic process [GO:0006646]; positive r…	SUBCELLULAR LOCATION: [Phosphatidylserine decarboxylase 1 beta chain]: Mitochondrion inner membrane {ECO:0000255|HAMAP-Rule:MF_03208, ECO:0000269|PubMed:14576278, ECO:0000269|PubMed:22984266, ECO:0000269|PubMed:23124206, ECO:0000269|PubMed:29290583, ECO:0000269|PubMed:3005242, ECO:0000269|PubMed:33718843, ECO:0000305|PubMed:34818062}; Single-pass membrane protein {ECO:0000255|HAMAP-Rule:MF_03208,…	TRANSMEM 80..98; /note="Helical"; /evidence="ECO:0000255|HAMAP-Rule:MF_03208"	TOPO_DOM 45..79; /note="Mitochondrial matrix"; /evidence="ECO:0000255|HAMAP-Rule:MF_03208, ECO:0000305|PubMed:22984266"; TOPO_DOM 99..500; /note="Mitochondrial intermembrane"; /evidence="ECO:0000255|HAMAP-Rule:MF_03208, ECO:0000305|PubMed:22984266"	phosphatidylserine decarboxylase activity [GO:0004609]	GO:0004609; GO:0005739; GO:0005743; GO:0005789; GO:0005811; GO:0006122; GO:0006646; GO:0006656; GO:0010636; GO:0010954; GO:0016540	TRUE	1
P00424	P00424	reviewed	COX5A_YEAST	Cytochrome c oxidase subunit 5A, mitochondrial (Cytochrome c oxidase polypeptide Va)	COX5A YNL052W N2474 YNL2474W	Saccharomyces cerevisiae (strain ATCC 204508 / S288c) (Baker's yeast)	153	mitochondrial electron transport, cytochrome c to oxygen [GO:0006123]; proton transmembrane transport [GO:1902600]	mitochondrial inner membrane [GO:0005743]; mitochondrial intermembrane space [GO:0005758]; mitochondrial respiratory chain complex IV [GO:0005751]; mitochondrion [GO:0005739]	mitochondrial inner membrane [GO:0005743]; mitochondrial intermembrane space [GO:0005758]; mitochondrial respiratory chain complex IV [GO:0005751]; mitochondrion [GO:0005739]; oxidoreductase activity [GO:0016491]; mitochondrial electron transport, cytochrome c to oxygen [GO:0006123]; proton transmembrane transport [GO:1902600]	SUBCELLULAR LOCATION: Mitochondrion inner membrane {ECO:0000269|PubMed:30598554}; Single-pass membrane protein {ECO:0000269|PubMed:30598554}.	TRANSMEM 89..111; /note="Helical"; /evidence="ECO:0000269|PubMed:30598554"	TOPO_DOM 21..88; /note="Mitochondrial matrix"; /evidence="ECO:0000269|PubMed:30598554"; TOPO_DOM 112..153; /note="Mitochondrial intermembrane"; /evidence="ECO:0000269|PubMed:30598554"	oxidoreductase activity [GO:0016491]	GO:0005739; GO:0005743; GO:0005751; GO:0005758; GO:0006123; GO:0016491; GO:1902600	TRUE	1
Q08023	Q08023	reviewed	FMP25_YEAST	Protein FMP25, mitochondrial (Found in mitochondrial proteome protein 25)	FMP25 YLR077W	Saccharomyces cerevisiae (strain ATCC 204508 / S288c) (Baker's yeast)	583	mitochondrial respiratory chain complex III assembly [GO:0034551]	mitochondrial inner membrane [GO:0005743]; mitochondrion [GO:0005739]	mitochondrial inner membrane [GO:0005743]; mitochondrion [GO:0005739]; mitochondrial respiratory chain complex III assembly [GO:0034551]	SUBCELLULAR LOCATION: Mitochondrion membrane {ECO:0000305}; Single-pass membrane protein {ECO:0000305}.	TRANSMEM 83..105; /note="Helical"; /evidence="ECO:0000255"			GO:0005739; GO:0005743; GO:0034551	TRUE	1
P53751	P53751	reviewed	YN94_YEAST	Uncharacterized membrane glycoprotein YNR065C	YNR065C N3539	Saccharomyces cerevisiae (strain ATCC 204508 / S288c) (Baker's yeast)	1116	Golgi to endosome transport [GO:0006895]; Golgi to vacuole transport [GO:0006896]; protein targeting to vacuole [GO:0006623]	cytosol [GO:0005829]; endoplasmic reticulum [GO:0005783]; Golgi apparatus [GO:0005794]; membrane [GO:0016020]	cytosol [GO:0005829]; endoplasmic reticulum [GO:0005783]; Golgi apparatus [GO:0005794]; membrane [GO:0016020]; Golgi to endosome transport [GO:0006895]; Golgi to vacuole transport [GO:0006896]; protein targeting to vacuole [GO:0006623]	SUBCELLULAR LOCATION: Membrane {ECO:0000305}; Single-pass membrane protein {ECO:0000305}.	TRANSMEM 934..957; /note="Helical"; /evidence="ECO:0000255"			GO:0005783; GO:0005794; GO:0005829; GO:0006623; GO:0006895; GO:0006896; GO:0016020	TRUE	1
P37267	P37267	reviewed	CBP4_YEAST	Assembly factor CBP4 (Cytochrome b mRNA-processing protein 4)	CBP4 YGR174C G7122	Saccharomyces cerevisiae (strain ATCC 204508 / S288c) (Baker's yeast)	147	mitochondrial respiratory chain complex III assembly [GO:0034551]	mitochondrial inner membrane [GO:0005743]; mitochondrial membrane [GO:0031966]; mitochondrion [GO:0005739]	mitochondrial inner membrane [GO:0005743]; mitochondrial membrane [GO:0031966]; mitochondrion [GO:0005739]; mitochondrial respiratory chain complex III assembly [GO:0034551]	SUBCELLULAR LOCATION: Mitochondrion inner membrane {ECO:0000305}; Single-pass membrane protein {ECO:0000305}.	TRANSMEM 5..27; /note="Helical"; /evidence="ECO:0000255"			GO:0005739; GO:0005743; GO:0031966; GO:0034551	TRUE	1
P38072	P38072	reviewed	SCO2_YEAST	Protein SCO2, mitochondrial	SCO2 YBR024W YBR0308	Saccharomyces cerevisiae (strain ATCC 204508 / S288c) (Baker's yeast)	301	cell redox homeostasis [GO:0045454]; cellular response to oxidative stress [GO:0034599]; intracellular copper ion homeostasis [GO:0006878]; mitochondrial cytochrome c oxidase assembly [GO:0033617]	mitochondrial inner membrane [GO:0005743]; mitochondrial membrane [GO:0031966]; mitochondrion [GO:0005739]	mitochondrial inner membrane [GO:0005743]; mitochondrial membrane [GO:0031966]; mitochondrion [GO:0005739]; copper chaperone activity [GO:0016531]; copper ion binding [GO:0005507]; cell redox homeostasis [GO:0045454]; cellular response to oxidative stress [GO:0034599]; intracellular copper ion homeostasis [GO:0006878]; mitochondrial cytochrome c oxidase assembly [GO:0033617]	SUBCELLULAR LOCATION: Mitochondrion inner membrane {ECO:0000250}.	TRANSMEM 82..98; /note="Helical"; /evidence="ECO:0000255"		copper chaperone activity [GO:0016531]; copper ion binding [GO:0005507]	GO:0005507; GO:0005739; GO:0005743; GO:0006878; GO:0016531; GO:0031966; GO:0033617; GO:0034599; GO:0045454	TRUE	1
P53947	P53947	reviewed	YNF8_YEAST	Vacuolar membrane protein YNL058C	YNL058C N2433 YNL2433C	Saccharomyces cerevisiae (strain ATCC 204508 / S288c) (Baker's yeast)	316		cellular bud neck [GO:0005935]; endoplasmic reticulum [GO:0005783]; fungal-type vacuole [GO:0000324]; vacuolar membrane [GO:0005774]	cellular bud neck [GO:0005935]; endoplasmic reticulum [GO:0005783]; fungal-type vacuole [GO:0000324]; vacuolar membrane [GO:0005774]	SUBCELLULAR LOCATION: Vacuole membrane {ECO:0000269|PubMed:14562095}; Single-pass membrane protein {ECO:0000269|PubMed:14562095}.	TRANSMEM 93..113; /note="Helical"; /evidence="ECO:0000255"			GO:0000324; GO:0005774; GO:0005783; GO:0005935	TRUE	1
P53324	P53324	reviewed	SAY1_YEAST	Steryl acetyl hydrolase 1 (EC 3.1.1.-)	SAY1 YGR263C	Saccharomyces cerevisiae (strain ATCC 204508 / S288c) (Baker's yeast)	424	response to toxic substance [GO:0009636]; sterol metabolic process [GO:0016125]	cell periphery [GO:0071944]; endoplasmic reticulum [GO:0005783]; endoplasmic reticulum lumen [GO:0005788]; endoplasmic reticulum membrane [GO:0005789]; lipid droplet [GO:0005811]; membrane [GO:0016020]	cell periphery [GO:0071944]; endoplasmic reticulum [GO:0005783]; endoplasmic reticulum lumen [GO:0005788]; endoplasmic reticulum membrane [GO:0005789]; lipid droplet [GO:0005811]; membrane [GO:0016020]; steryl deacetylase activity [GO:0034084]; response to toxic substance [GO:0009636]; sterol metabolic process [GO:0016125]	SUBCELLULAR LOCATION: Endoplasmic reticulum membrane {ECO:0000269|PubMed:18034159}; Single-pass type II membrane protein {ECO:0000269|PubMed:18034159}.	TRANSMEM 46..66; /note="Helical; Signal-anchor for type II membrane protein"; /evidence="ECO:0000255"	TOPO_DOM 2..45; /note="Cytoplasmic"; /evidence="ECO:0000255"; TOPO_DOM 67..424; /note="Lumenal"; /evidence="ECO:0000255"	steryl deacetylase activity [GO:0034084]	GO:0005783; GO:0005788; GO:0005789; GO:0005811; GO:0009636; GO:0016020; GO:0016125; GO:0034084; GO:0071944	TRUE	1
P28737	P28737	reviewed	MSP1_YEAST	Outer mitochondrial transmembrane helix translocase (EC 7.4.2.-) (Mitochondrial sorting of proteins) (Tat-binding homolog 4)	MSP1 YTA4 YGR028W	Saccharomyces cerevisiae (strain ATCC 204508 / S288c) (Baker's yeast)	362	extraction of mislocalized protein from mitochondrial outer membrane [GO:0140570]; protein hexamerization [GO:0034214]; protein targeting to mitochondrion [GO:0006626]	mitochondrial outer membrane [GO:0005741]; mitochondrion [GO:0005739]; peroxisomal membrane [GO:0005778]	mitochondrial outer membrane [GO:0005741]; mitochondrion [GO:0005739]; peroxisomal membrane [GO:0005778]; ATP binding [GO:0005524]; ATP hydrolysis activity [GO:0016887]; membrane protein dislocase activity [GO:0140567]; extraction of mislocalized protein from mitochondrial outer membrane [GO:0140570]; protein hexamerization [GO:0034214]; protein targeting to mitochondrion [GO:0006626]	SUBCELLULAR LOCATION: Mitochondrion outer membrane {ECO:0000269|PubMed:24843043, ECO:0000269|PubMed:28906250, ECO:0000269|PubMed:31445887, ECO:0000269|PubMed:8226973, ECO:0000305|PubMed:24821790}; Single-pass membrane protein {ECO:0000255}. Peroxisome membrane {ECO:0000269|PubMed:24821790, ECO:0000269|PubMed:24843043, ECO:0000269|PubMed:28906250}; Single-pass membrane protein {ECO:0000255}.	TRANSMEM 13..28; /note="Helical"; /evidence="ECO:0000255"	TOPO_DOM 1..12; /note="Mitochondrial intermembrane"; /evidence="ECO:0000305|PubMed:28712723, ECO:0000305|PubMed:8226973"; TOPO_DOM 29..362; /note="Cytoplasmic"; /evidence="ECO:0000305|PubMed:28712723, ECO:0000305|PubMed:8226973"	ATP binding [GO:0005524]; ATP hydrolysis activity [GO:0016887]; membrane protein dislocase activity [GO:0140567]	GO:0005524; GO:0005739; GO:0005741; GO:0005778; GO:0006626; GO:0016887; GO:0034214; GO:0140567; GO:0140570	TRUE	1
Q06247	Q06247	reviewed	YL173_YEAST	Putative uncharacterized protein YLR173W	YLR173W	Saccharomyces cerevisiae (strain ATCC 204508 / S288c) (Baker's yeast)	608		fungal-type vacuole membrane [GO:0000329]; membrane [GO:0016020]	fungal-type vacuole membrane [GO:0000329]; membrane [GO:0016020]	SUBCELLULAR LOCATION: Membrane {ECO:0000305}; Single-pass membrane protein {ECO:0000305}.	TRANSMEM 55..75; /note="Helical"; /evidence="ECO:0000255"			GO:0000329; GO:0016020	TRUE	1
P39722	P39722	reviewed	GEM1_YEAST	Mitochondrial Rho GTPase 1 (EC 3.6.5.-) (GTPase EF-hand protein of mitochondria 1)	GEM1 YAL048C	Saccharomyces cerevisiae (strain ATCC 204508 / S288c) (Baker's yeast)	662	actin filament organization [GO:0007015]; heme transport [GO:0015886]; mitochondrion inheritance [GO:0000001]; mitochondrion organization [GO:0007005]; mitochondrion-endoplasmic reticulum membrane tethering [GO:1990456]; phospholipid homeostasis [GO:0055091]; regulation of mitochondrion organization [GO:0010821]; signal transduction [GO:0007165]; small GTPase mediated signal transduction [GO:0007…	ERMES complex [GO:0032865]; mitochondrial outer membrane [GO:0005741]; mitochondrion [GO:0005739]; outer mitochondrial membrane protein complex [GO:0098799]	ERMES complex [GO:0032865]; mitochondrial outer membrane [GO:0005741]; mitochondrion [GO:0005739]; outer mitochondrial membrane protein complex [GO:0098799]; calcium ion binding [GO:0005509]; GTP binding [GO:0005525]; GTPase activity [GO:0003924]; actin filament organization [GO:0007015]; heme transport [GO:0015886]; mitochondrion inheritance [GO:0000001]; mitochondrion organization [GO:0007005];…	SUBCELLULAR LOCATION: Mitochondrion outer membrane {ECO:0000269|PubMed:15479738, ECO:0000269|PubMed:16407407, ECO:0000269|PubMed:16823961}; Single-pass type IV membrane protein {ECO:0000269|PubMed:15479738, ECO:0000269|PubMed:16407407, ECO:0000269|PubMed:16823961}.	TRANSMEM 635..655; /note="Helical; Anchor for type IV membrane protein"; /evidence="ECO:0000255"	TOPO_DOM 1..634; /note="Cytoplasmic"; /evidence="ECO:0000255"; TOPO_DOM 656..662; /note="Mitochondrial intermembrane"; /evidence="ECO:0000255"	calcium ion binding [GO:0005509]; GTP binding [GO:0005525]; GTPase activity [GO:0003924]	GO:0000001; GO:0003924; GO:0005509; GO:0005525; GO:0005739; GO:0005741; GO:0007005; GO:0007015; GO:0007165; GO:0007264; GO:0010821; GO:0015886; GO:0032865; GO:0055091; GO:0098799; GO:1990456	TRUE	1
Q07950	Q07950	reviewed	YEH2_YEAST	Sterol esterase 2 (EC 3.1.1.13) (Steryl ester hydrolase 2)	YEH2 YLR020C	Saccharomyces cerevisiae (strain ATCC 204508 / S288c) (Baker's yeast)	538	cell wall mannoprotein biosynthetic process [GO:0000032]; lipid catabolic process [GO:0016042]; sterol metabolic process [GO:0016125]	cell periphery [GO:0071944]; membrane [GO:0016020]; plasma membrane [GO:0005886]	cell periphery [GO:0071944]; membrane [GO:0016020]; plasma membrane [GO:0005886]; sterol esterase activity [GO:0004771]; cell wall mannoprotein biosynthetic process [GO:0000032]; lipid catabolic process [GO:0016042]; sterol metabolic process [GO:0016125]	SUBCELLULAR LOCATION: Cell membrane {ECO:0000269|PubMed:15632184, ECO:0000269|PubMed:15713625}; Single-pass type II membrane protein {ECO:0000269|PubMed:15632184, ECO:0000269|PubMed:15713625}.	TRANSMEM 12..32; /note="Helical; Signal-anchor for type II membrane protein"; /evidence="ECO:0000255"	TOPO_DOM 1..11; /note="Cytoplasmic"; /evidence="ECO:0000269|PubMed:15713625"; TOPO_DOM 33..538; /note="Lumenal"; /evidence="ECO:0000269|PubMed:15713625"	sterol esterase activity [GO:0004771]	GO:0000032; GO:0004771; GO:0005886; GO:0016020; GO:0016042; GO:0016125; GO:0071944	TRUE	1
Q06508	Q06508	reviewed	LOA1_YEAST	Lysophosphatidic acid:oleoyl-CoA acyltransferase 1 (LPAAT) (Lysophosphatidic acid acyltransferase) (EC 2.3.1.51) (Vacuolar protein sorting-associated protein 66)	LOA1 VPS66 YPR139C	Saccharomyces cerevisiae (strain ATCC 204508 / S288c) (Baker's yeast)	300	intracellular triglyceride homeostasis [GO:0035356]; lipid droplet organization [GO:0034389]; lipid metabolic process [GO:0006629]; protein targeting to vacuole [GO:0006623]	cytoplasm [GO:0005737]; endoplasmic reticulum [GO:0005783]; endoplasmic reticulum membrane [GO:0005789]; lipid droplet [GO:0005811]	cytoplasm [GO:0005737]; endoplasmic reticulum [GO:0005783]; endoplasmic reticulum membrane [GO:0005789]; lipid droplet [GO:0005811]; 1-acylglycerol-3-phosphate O-acyltransferase activity [GO:0003841]; lysophosphatidic acid acyltransferase activity [GO:0042171]; intracellular triglyceride homeostasis [GO:0035356]; lipid droplet organization [GO:0034389]; lipid metabolic process [GO:0006629]; prote…	SUBCELLULAR LOCATION: Lipid droplet {ECO:0000269|PubMed:21820081, ECO:0000269|PubMed:22090344}. Endoplasmic reticulum membrane {ECO:0000305|PubMed:22090344}; Single-pass membrane protein {ECO:0000255}. Note=Lipid droplets consist of a surface phospholipid monolayer and a hydrophobic interior. The latter makes embedding of proteins containing transmembrane segments difficult, and these may instead…	TRANSMEM 33..53; /note="Helical"; /evidence="ECO:0000255"		1-acylglycerol-3-phosphate O-acyltransferase activity [GO:0003841]; lysophosphatidic acid acyltransferase activity [GO:0042171]	GO:0003841; GO:0005737; GO:0005783; GO:0005789; GO:0005811; GO:0006623; GO:0006629; GO:0034389; GO:0035356; GO:0042171	TRUE	1
P16661	P16661	reviewed	ALG1_YEAST	Chitobiosyldiphosphodolichol beta-mannosyltransferase (EC 2.4.1.142) (Asparagine-linked glycosylation protein 1) (Beta-1,4-mannosyltransferase) (GDP-Man:GlcNAc2-PP-dolichol mannosyltransferase) (GDP-mannose-dolichol diphosphochitobiose mannosyltransferase)	ALG1 YBR110W YBR0906	Saccharomyces cerevisiae (strain ATCC 204508 / S288c) (Baker's yeast)	449	oligosaccharide-lipid intermediate biosynthetic process [GO:0006490]; protein glycosylation [GO:0006486]; protein N-linked glycosylation [GO:0006487]	endoplasmic reticulum [GO:0005783]; endoplasmic reticulum membrane [GO:0005789]	endoplasmic reticulum [GO:0005783]; endoplasmic reticulum membrane [GO:0005789]; beta-1,4-mannosyltransferase activity [GO:0019187]; chitobiosyldiphosphodolichol beta-mannosyltransferase activity [GO:0004578]; mannosyltransferase activity [GO:0000030]; oligosaccharide-lipid intermediate biosynthetic process [GO:0006490]; protein glycosylation [GO:0006486]; protein N-linked glycosylation [GO:00064…	SUBCELLULAR LOCATION: Endoplasmic reticulum membrane {ECO:0000305}; Single-pass type II membrane protein {ECO:0000305}.	TRANSMEM 8..34; /note="Helical; Signal-anchor for type II membrane protein"; /evidence="ECO:0000255"	TOPO_DOM 1..7; /note="Cytoplasmic"; /evidence="ECO:0000255"; TOPO_DOM 35..449; /note="Lumenal"; /evidence="ECO:0000255"	beta-1,4-mannosyltransferase activity [GO:0019187]; chitobiosyldiphosphodolichol beta-mannosyltransferase activity [GO:0004578]; mannosyltransferase activity [GO:0000030]	GO:0000030; GO:0004578; GO:0005783; GO:0005789; GO:0006486; GO:0006487; GO:0006490; GO:0019187	TRUE	1
P53954	P53954	reviewed	ALG11_YEAST	GDP-Man:Man(3)GlcNAc(2)-PP-Dol alpha-1,2-mannosyltransferase (EC 2.4.1.131) (Alpha-1,2-mannosyltransferase ALG11) (Asparagine-linked glycosylation protein 11) (Glycolipid 2-alpha-mannosyltransferase)	ALG11 YNL048W N2510 YNL2510W	Saccharomyces cerevisiae (strain ATCC 204508 / S288c) (Baker's yeast)	548	oligosaccharide-lipid intermediate biosynthetic process [GO:0006490]; protein glycosylation [GO:0006486]; protein N-linked glycosylation [GO:0006487]	endoplasmic reticulum membrane [GO:0005789]	endoplasmic reticulum membrane [GO:0005789]; alpha-1,2-mannosyltransferase activity [GO:0000026]; GDP-Man:Man3GlcNAc2-PP-Dol alpha-1,2-mannosyltransferase activity [GO:0004377]; oligosaccharide-lipid intermediate biosynthetic process [GO:0006490]; protein glycosylation [GO:0006486]; protein N-linked glycosylation [GO:0006487]	SUBCELLULAR LOCATION: Endoplasmic reticulum membrane {ECO:0000269|PubMed:11278778}; Single-pass type II membrane protein {ECO:0000269|PubMed:11278778}.	TRANSMEM 21..41; /note="Helical; Signal-anchor for type II membrane protein"; /evidence="ECO:0000255"	TOPO_DOM 1..20; /note="Cytoplasmic"; /evidence="ECO:0000255"; TOPO_DOM 42..548; /note="Lumenal"; /evidence="ECO:0000255"	alpha-1,2-mannosyltransferase activity [GO:0000026]; GDP-Man:Man3GlcNAc2-PP-Dol alpha-1,2-mannosyltransferase activity [GO:0004377]	GO:0000026; GO:0004377; GO:0005789; GO:0006486; GO:0006487; GO:0006490	TRUE	1
P37299	P37299	reviewed	QCR10_YEAST	Cytochrome b-c1 complex subunit 10, mitochondrial (Complex III subunit 10) (Complex III subunit XI) (Ubiquinol-cytochrome c oxidoreductase subunit 10) (Ubiquinol-cytochrome c reductase 8.5 kDa protein)	QCR10 YHR001W-A YHR001BW	Saccharomyces cerevisiae (strain ATCC 204508 / S288c) (Baker's yeast)	77	aerobic respiration [GO:0009060]; cellular respiration [GO:0045333]; mitochondrial electron transport, ubiquinol to cytochrome c [GO:0006122]; proton transmembrane transport [GO:1902600]	mitochondrial inner membrane [GO:0005743]; mitochondrial respiratory chain complex III [GO:0005750]; mitochondrion [GO:0005739]	mitochondrial inner membrane [GO:0005743]; mitochondrial respiratory chain complex III [GO:0005750]; mitochondrion [GO:0005739]; aerobic respiration [GO:0009060]; cellular respiration [GO:0045333]; mitochondrial electron transport, ubiquinol to cytochrome c [GO:0006122]; proton transmembrane transport [GO:1902600]	SUBCELLULAR LOCATION: Mitochondrion inner membrane {ECO:0000269|PubMed:30598554}; Single-pass membrane protein {ECO:0000269|PubMed:30598554}.	TRANSMEM 22..45; /note="Helical"; /evidence="ECO:0000269|PubMed:30598554"	TOPO_DOM 2..21; /note="Mitochondrial matrix"; /evidence="ECO:0000269|PubMed:30598554"; TOPO_DOM 46..77; /note="Mitochondrial intermembrane"; /evidence="ECO:0000269|PubMed:30598554"		GO:0005739; GO:0005743; GO:0005750; GO:0006122; GO:0009060; GO:0045333; GO:1902600	TRUE	1
P39718	P39718	reviewed	PEX22_YEAST	Peroxisome assembly protein 22 (Peroxin-22)	PEX22 YAL055W	Saccharomyces cerevisiae (strain ATCC 204508 / S288c) (Baker's yeast)	180	positive regulation of protein autoubiquitination [GO:1902499]; positive regulation of protein ubiquitination [GO:0031398]; protein import into peroxisome matrix, receptor recycling [GO:0016562]	cytoplasm [GO:0005737]; peroxisomal membrane [GO:0005778]	cytoplasm [GO:0005737]; peroxisomal membrane [GO:0005778]; ubiquitin-protein transferase activator activity [GO:0097027]; positive regulation of protein autoubiquitination [GO:1902499]; positive regulation of protein ubiquitination [GO:0031398]; protein import into peroxisome matrix, receptor recycling [GO:0016562]	SUBCELLULAR LOCATION: Peroxisome membrane {ECO:0000250}; Single-pass membrane protein {ECO:0000250}.	TRANSMEM 15..32; /note="Helical"; /evidence="ECO:0000255"		ubiquitin-protein transferase activator activity [GO:0097027]	GO:0005737; GO:0005778; GO:0016562; GO:0031398; GO:0097027; GO:1902499	TRUE	1
P53045	P53045	reviewed	ERG25_YEAST	C-4 methylsterol oxidase ERG25 (EC 1.14.18.-) (Ergosterol biosynthetic protein 25) (Sterol-C4-methyl oxidase ERG25) (SMO)	ERG25 FET6 YGR060W	Saccharomyces cerevisiae (strain ATCC 204508 / S288c) (Baker's yeast)	309	ergosterol biosynthetic process [GO:0006696]	endoplasmic reticulum membrane [GO:0005789]; plasma membrane [GO:0005886]	endoplasmic reticulum membrane [GO:0005789]; plasma membrane [GO:0005886]; C-4 methylsterol oxidase activity [GO:0000254]; iron ion binding [GO:0005506]; ergosterol biosynthetic process [GO:0006696]	SUBCELLULAR LOCATION: Endoplasmic reticulum membrane {ECO:0000305|PubMed:12119386, ECO:0000305|PubMed:15716577, ECO:0000305|PubMed:8663358}; Single-pass membrane protein {ECO:0000305|PubMed:12119386, ECO:0000305|PubMed:15716577, ECO:0000305|PubMed:8663358}.	TRANSMEM 56..76; /note="Helical"; /evidence="ECO:0000255"		C-4 methylsterol oxidase activity [GO:0000254]; iron ion binding [GO:0005506]	GO:0000254; GO:0005506; GO:0005789; GO:0005886; GO:0006696	TRUE	1
P36046	P36046	reviewed	MIA40_YEAST	Mitochondrial intermembrane space import and assembly protein 40 (Mitochondrial import inner membrane translocase TIM40)	MIA40 TIM40 YKL195W	Saccharomyces cerevisiae (strain ATCC 204508 / S288c) (Baker's yeast)	403	protein folding [GO:0006457]; protein import into mitochondrial intermembrane space [GO:0045041]; protein maturation by protein folding [GO:0022417]	mitochondrial inner membrane [GO:0005743]; mitochondrial intermembrane space [GO:0005758]; mitochondrion [GO:0005739]	mitochondrial inner membrane [GO:0005743]; mitochondrial intermembrane space [GO:0005758]; mitochondrion [GO:0005739]; 2 iron, 2 sulfur cluster binding [GO:0051537]; oxidoreductase activity [GO:0016491]; protein disulfide isomerase activity [GO:0003756]; protein-disulfide reductase activity [GO:0015035]; thiol oxidase activity [GO:0016972]; protein folding [GO:0006457]; protein import into mitoch…	SUBCELLULAR LOCATION: Mitochondrion inner membrane {ECO:0000269|PubMed:14562095, ECO:0000269|PubMed:14576278, ECO:0000269|PubMed:15359280, ECO:0000269|PubMed:15364952, ECO:0000269|PubMed:15620710, ECO:0000269|PubMed:16407407}; Single-pass type II membrane protein {ECO:0000269|PubMed:14562095, ECO:0000269|PubMed:14576278, ECO:0000269|PubMed:15359280, ECO:0000269|PubMed:15364952, ECO:0000269|PubMed…	TRANSMEM 47..66; /note="Helical; Signal-anchor for type II membrane protein"; /evidence="ECO:0000255"	TOPO_DOM 33..46; /note="Mitochondrial matrix"; /evidence="ECO:0000255"; TOPO_DOM 67..403; /note="Mitochondrial intermembrane"; /evidence="ECO:0000255"	2 iron, 2 sulfur cluster binding [GO:0051537]; oxidoreductase activity [GO:0016491]; protein disulfide isomerase activity [GO:0003756]; protein-disulfide reductase activity [GO:0015035]; thiol oxidase activity [GO:0016972]	GO:0003756; GO:0005739; GO:0005743; GO:0005758; GO:0006457; GO:0015035; GO:0016491; GO:0016972; GO:0022417; GO:0045041; GO:0051537	TRUE	1
P33296	P33296	reviewed	UBC6_YEAST	Ubiquitin-conjugating enzyme E2 6 (EC 2.3.2.23) (E2 ubiquitin-conjugating enzyme 6) (Ubiquitin carrier protein UBC6) (Ubiquitin-protein ligase UBC6)	UBC6 DOA2 YER100W	Saccharomyces cerevisiae (strain ATCC 204508 / S288c) (Baker's yeast)	250	protein monoubiquitination [GO:0006513]; protein polyubiquitination [GO:0000209]; ubiquitin-dependent ERAD pathway [GO:0030433]	endoplasmic reticulum [GO:0005783]; endoplasmic reticulum membrane [GO:0005789]; nucleus [GO:0005634]	endoplasmic reticulum [GO:0005783]; endoplasmic reticulum membrane [GO:0005789]; nucleus [GO:0005634]; ATP binding [GO:0005524]; ubiquitin conjugating enzyme activity [GO:0061631]; ubiquitin-protein transferase activity [GO:0004842]; protein monoubiquitination [GO:0006513]; protein polyubiquitination [GO:0000209]; ubiquitin-dependent ERAD pathway [GO:0030433]	SUBCELLULAR LOCATION: Endoplasmic reticulum membrane {ECO:0000269|PubMed:8396728}.	TRANSMEM 233..249; /note="Helical"; /evidence="ECO:0000255"	TOPO_DOM 1..232; /note="Cytoplasmic"; /evidence="ECO:0000255"	ATP binding [GO:0005524]; ubiquitin conjugating enzyme activity [GO:0061631]; ubiquitin-protein transferase activity [GO:0004842]	GO:0000209; GO:0004842; GO:0005524; GO:0005634; GO:0005783; GO:0005789; GO:0006513; GO:0030433; GO:0061631	TRUE	1
P47045	P47045	reviewed	TIM54_YEAST	Mitochondrial import inner membrane translocase subunit TIM54	TIM54 YJL054W J1150	Saccharomyces cerevisiae (strain ATCC 204508 / S288c) (Baker's yeast)	478	phosphorylation [GO:0016310]; protein insertion into mitochondrial inner membrane [GO:0045039]; protein transmembrane transport [GO:0071806]; sphingosine biosynthetic process [GO:0046512]	cytoplasm [GO:0005737]; cytosol [GO:0005829]; intracellular membrane-bounded organelle [GO:0043231]; membrane [GO:0016020]; mitochondrial inner membrane [GO:0005743]; mitochondrial intermembrane space [GO:0005758]; mitochondrion [GO:0005739]; TIM22 mitochondrial import inner membrane insertion complex [GO:0042721]	cytoplasm [GO:0005737]; cytosol [GO:0005829]; intracellular membrane-bounded organelle [GO:0043231]; membrane [GO:0016020]; mitochondrial inner membrane [GO:0005743]; mitochondrial intermembrane space [GO:0005758]; mitochondrion [GO:0005739]; TIM22 mitochondrial import inner membrane insertion complex [GO:0042721]; D-erythro-sphingosine kinase activity [GO:0017050]; phosphorylation [GO:0016310]; …	SUBCELLULAR LOCATION: Mitochondrion inner membrane {ECO:0000269|PubMed:10397776, ECO:0000269|PubMed:10637294, ECO:0000269|PubMed:14562095, ECO:0000269|PubMed:9412462}; Single-pass membrane protein {ECO:0000269|PubMed:10397776, ECO:0000269|PubMed:10637294, ECO:0000269|PubMed:14562095, ECO:0000269|PubMed:9412462}. Note=Import into inner membrane protein requires TOM70 function.	TRANSMEM 33..49; /note="Helical"; /evidence="ECO:0000255"	TOPO_DOM 1..32; /note="Mitochondrial matrix"; /evidence="ECO:0000255"; TOPO_DOM 50..478; /note="Mitochondrial intermembrane"; /evidence="ECO:0000255"	D-erythro-sphingosine kinase activity [GO:0017050]	GO:0005737; GO:0005739; GO:0005743; GO:0005758; GO:0005829; GO:0016020; GO:0016310; GO:0017050; GO:0042721; GO:0043231; GO:0045039; GO:0046512; GO:0071806	TRUE	1
P50108	P50108	reviewed	MNN10_YEAST	Probable alpha-1,6-mannosyltransferase MNN10 (EC 2.4.1.-) (Bud emergence delay protein 1) (Mannan polymerase II complex MNN10 subunit) (M-Pol II subunit MNN10)	MNN10 BED1 YDR245W YD8419.12	Saccharomyces cerevisiae (strain ATCC 204508 / S288c) (Baker's yeast)	393	cell budding [GO:0007114]; cell wall mannoprotein biosynthetic process [GO:0000032]; division septum assembly [GO:0000917]; protein N-linked glycosylation [GO:0006487]	endoplasmic reticulum [GO:0005783]; endoplasmic reticulum membrane [GO:0005789]; Golgi membrane [GO:0000139]; mannan polymerase complex [GO:0000136]	endoplasmic reticulum [GO:0005783]; endoplasmic reticulum membrane [GO:0005789]; Golgi membrane [GO:0000139]; mannan polymerase complex [GO:0000136]; alpha-1,6-mannosyltransferase activity [GO:0000009]; cell budding [GO:0007114]; cell wall mannoprotein biosynthetic process [GO:0000032]; division septum assembly [GO:0000917]; protein N-linked glycosylation [GO:0006487]	SUBCELLULAR LOCATION: Endoplasmic reticulum membrane; Single-pass type II membrane protein. Golgi apparatus, cis-Golgi network membrane; Single-pass type II membrane protein.	TRANSMEM 53..73; /note="Helical; Signal-anchor for type II membrane protein"; /evidence="ECO:0000255"	TOPO_DOM 1..52; /note="Cytoplasmic"; /evidence="ECO:0000255"; TOPO_DOM 74..393; /note="Lumenal"; /evidence="ECO:0000255"	alpha-1,6-mannosyltransferase activity [GO:0000009]	GO:0000009; GO:0000032; GO:0000136; GO:0000139; GO:0000917; GO:0005783; GO:0005789; GO:0006487; GO:0007114	TRUE	1
P53008	P53008	reviewed	CWH41_YEAST	Mannosyl-oligosaccharide glucosidase (EC 3.2.1.106) (Processing A-glucosidase I) (Glucosidase I)	CWH41 GLS1 YGL027C	Saccharomyces cerevisiae (strain ATCC 204508 / S288c) (Baker's yeast)	833	fungal-type cell wall beta-glucan biosynthetic process [GO:0070880]; fungal-type cell wall biogenesis [GO:0009272]; oligosaccharide metabolic process [GO:0009311]; protein N-linked glycosylation [GO:0006487]	endoplasmic reticulum membrane [GO:0005789]; fungal-type vacuole [GO:0000324]	endoplasmic reticulum membrane [GO:0005789]; fungal-type vacuole [GO:0000324]; Glc3Man9GlcNAc2 oligosaccharide glucosidase activity [GO:0004573]; fungal-type cell wall beta-glucan biosynthetic process [GO:0070880]; fungal-type cell wall biogenesis [GO:0009272]; oligosaccharide metabolic process [GO:0009311]; protein N-linked glycosylation [GO:0006487]	SUBCELLULAR LOCATION: Endoplasmic reticulum membrane {ECO:0000269|PubMed:8576053}; Single-pass type II membrane protein {ECO:0000269|PubMed:8576053}.	TRANSMEM 11..28; /note="Helical; Signal-anchor for type II membrane protein"; /evidence="ECO:0000255"	TOPO_DOM 1..10; /note="Cytoplasmic"; /evidence="ECO:0000255"; TOPO_DOM 29..833; /note="Lumenal"; /evidence="ECO:0000255"	Glc3Man9GlcNAc2 oligosaccharide glucosidase activity [GO:0004573]	GO:0000324; GO:0004573; GO:0005789; GO:0006487; GO:0009272; GO:0009311; GO:0070880	TRUE	1
P22214	P22214	reviewed	SEC22_YEAST	Protein transport protein SEC22 (Suppressor of loss of YPT1 protein 2)	SEC22 SLY2 TSL26 YLR268W L8479.3	Saccharomyces cerevisiae (strain ATCC 204508 / S288c) (Baker's yeast)	214	endoplasmic reticulum to Golgi vesicle-mediated transport [GO:0006888]; intracellular protein transport [GO:0006886]; retrograde vesicle-mediated transport, Golgi to endoplasmic reticulum [GO:0006890]; vesicle fusion [GO:0006906]; vesicle fusion with endoplasmic reticulum [GO:0048279]; vesicle fusion with Golgi apparatus [GO:0048280]	cytoplasmic side of endoplasmic reticulum membrane [GO:0098554]; endoplasmic reticulum [GO:0005783]; endoplasmic reticulum membrane [GO:0005789]; endoplasmic reticulum-Golgi intermediate compartment [GO:0005793]; ER to Golgi transport vesicle membrane [GO:0012507]; Golgi apparatus [GO:0005794]; Golgi membrane [GO:0000139]; Golgi to ER transport vesicle membrane [GO:0012508]; membrane [GO:0016020]…	cytoplasmic side of endoplasmic reticulum membrane [GO:0098554]; endoplasmic reticulum [GO:0005783]; endoplasmic reticulum membrane [GO:0005789]; endoplasmic reticulum-Golgi intermediate compartment [GO:0005793]; ER to Golgi transport vesicle membrane [GO:0012507]; Golgi apparatus [GO:0005794]; Golgi membrane [GO:0000139]; Golgi to ER transport vesicle membrane [GO:0012508]; membrane [GO:0016020]…	SUBCELLULAR LOCATION: Membrane {ECO:0000305}; Single-pass type IV membrane protein {ECO:0000305}. Endoplasmic reticulum membrane {ECO:0000305}; Single-pass type IV membrane protein {ECO:0000305}. Golgi apparatus membrane {ECO:0000305}; Single-pass type IV membrane protein {ECO:0000305}.	TRANSMEM 193..213; /note="Helical; Anchor for type IV membrane protein"; /evidence="ECO:0000255"	TOPO_DOM 1..192; /note="Cytoplasmic"; /evidence="ECO:0000255"; TOPO_DOM 214; /note="Vesicular"; /evidence="ECO:0000255"	SNAP receptor activity [GO:0005484]	GO:0000139; GO:0005484; GO:0005783; GO:0005789; GO:0005793; GO:0005794; GO:0006886; GO:0006888; GO:0006890; GO:0006906; GO:0012507; GO:0012508; GO:0016020; GO:0031201; GO:0048279; GO:0048280; GO:0098554	TRUE	1
P35179	P35179	reviewed	SC61G_YEAST	Protein transport protein SSS1 (Sec61 complex subunit SSS1) (Sec61 complex subunit gamma) (Ssh1 complex subunit SSS1) (Ssh1 complex subunit gamma)	SSS1 YDR086C D4475	Saccharomyces cerevisiae (strain ATCC 204508 / S288c) (Baker's yeast)	80	post-translational protein targeting to membrane, translocation [GO:0031204]; SRP-dependent cotranslational protein targeting to membrane [GO:0006614]; SRP-dependent cotranslational protein targeting to membrane, translocation [GO:0006616]	endoplasmic reticulum [GO:0005783]; endoplasmic reticulum membrane [GO:0005789]; nuclear inner membrane [GO:0005637]; rough endoplasmic reticulum membrane [GO:0030867]; Sec61 translocon complex [GO:0005784]; Ssh1 translocon complex [GO:0071261]; translocon complex [GO:0071256]	endoplasmic reticulum [GO:0005783]; endoplasmic reticulum membrane [GO:0005789]; nuclear inner membrane [GO:0005637]; rough endoplasmic reticulum membrane [GO:0030867]; Sec61 translocon complex [GO:0005784]; Ssh1 translocon complex [GO:0071261]; translocon complex [GO:0071256]; protein transmembrane transporter activity [GO:0008320]; structural molecule activity [GO:0005198]; post-translational p…	SUBCELLULAR LOCATION: Endoplasmic reticulum membrane {ECO:0000269|PubMed:14562095}; Single-pass membrane protein {ECO:0000269|PubMed:14562095}.	TRANSMEM 47..75; /note="Helical"; /evidence="ECO:0000255"	TOPO_DOM 1..46; /note="Cytoplasmic"; /evidence="ECO:0000255"; TOPO_DOM 76..80; /note="Extracellular"; /evidence="ECO:0000255"	protein transmembrane transporter activity [GO:0008320]; structural molecule activity [GO:0005198]	GO:0005198; GO:0005637; GO:0005783; GO:0005784; GO:0005789; GO:0006614; GO:0006616; GO:0008320; GO:0030867; GO:0031204; GO:0071256; GO:0071261	TRUE	1
P53903	P53903	reviewed	PGA2_YEAST	Processing of GAS1 and ALP protein 2	PGA2 YNL149C N1774	Saccharomyces cerevisiae (strain ATCC 204508 / S288c) (Baker's yeast)	129	protein transport [GO:0015031]	endoplasmic reticulum [GO:0005783]; endoplasmic reticulum membrane [GO:0005789]; nuclear envelope [GO:0005635]; nuclear membrane [GO:0031965]	endoplasmic reticulum [GO:0005783]; endoplasmic reticulum membrane [GO:0005789]; nuclear envelope [GO:0005635]; nuclear membrane [GO:0031965]; protein transport [GO:0015031]	SUBCELLULAR LOCATION: Endoplasmic reticulum membrane {ECO:0000269|PubMed:14690591}; Single-pass membrane protein {ECO:0000255}. Nucleus membrane {ECO:0000269|PubMed:14690591}; Single-pass membrane protein {ECO:0000255}.	TRANSMEM 23..42; /note="Helical"; /evidence="ECO:0000255"			GO:0005635; GO:0005783; GO:0005789; GO:0015031; GO:0031965	TRUE	1
P07143	P07143	reviewed	CY1_YEAST	Cytochrome c1, heme protein, mitochondrial (EC 7.1.1.8) (Complex III subunit 4) (Complex III subunit IV) (Cytochrome b-c1 complex subunit 4) (Ubiquinol-cytochrome c oxidoreductase cytochrome c1 subunit) (Cytochrome c-1)	CYT1 CTC1 YOR065W YOR29-16	Saccharomyces cerevisiae (strain ATCC 204508 / S288c) (Baker's yeast)	309	cellular respiration [GO:0045333]; mitochondrial electron transport, ubiquinol to cytochrome c [GO:0006122]	cytosol [GO:0005829]; mitochondrial inner membrane [GO:0005743]; mitochondrial intermembrane space [GO:0005758]; mitochondrial respiratory chain complex III [GO:0005750]; mitochondrion [GO:0005739]	cytosol [GO:0005829]; mitochondrial inner membrane [GO:0005743]; mitochondrial intermembrane space [GO:0005758]; mitochondrial respiratory chain complex III [GO:0005750]; mitochondrion [GO:0005739]; heme binding [GO:0020037]; metal ion binding [GO:0046872]; ubiquinol-cytochrome-c reductase activity [GO:0008121]; cellular respiration [GO:0045333]; mitochondrial electron transport, ubiquinol to cyt…	SUBCELLULAR LOCATION: Mitochondrion inner membrane {ECO:0000269|PubMed:18390544, ECO:0000269|PubMed:30598554}; Single-pass membrane protein {ECO:0000269|PubMed:18390544, ECO:0000269|PubMed:30598554}.	TRANSMEM 263..296; /note="Helical"; /evidence="ECO:0000269|PubMed:18390544, ECO:0000269|PubMed:30598554"	TOPO_DOM 62..262; /note="Mitochondrial intermembrane"; /evidence="ECO:0000269|PubMed:18390544, ECO:0000269|PubMed:30598554, ECO:0000269|PubMed:9430684"; TOPO_DOM 297..309; /note="Mitochondrial matrix"; /evidence="ECO:0000269|PubMed:18390544, ECO:0000269|PubMed:30598554, ECO:0000269|PubMed:9430684"	heme binding [GO:0020037]; metal ion binding [GO:0046872]; ubiquinol-cytochrome-c reductase activity [GO:0008121]	GO:0005739; GO:0005743; GO:0005750; GO:0005758; GO:0005829; GO:0006122; GO:0008121; GO:0020037; GO:0045333; GO:0046872	TRUE	1
P33754	P33754	reviewed	SEC66_YEAST	Translocation protein SEC66 (Protein HSS1) (Sec62/63 complex 31.5 kDa subunit)	SEC66 HSS1 SEC71 YBR171W YBR1232	Saccharomyces cerevisiae (strain ATCC 204508 / S288c) (Baker's yeast)	206	filamentous growth [GO:0030447]; post-translational protein targeting to membrane, translocation [GO:0031204]	cell periphery [GO:0071944]; endoplasmic reticulum [GO:0005783]; endoplasmic reticulum membrane [GO:0005789]; rough endoplasmic reticulum membrane [GO:0030867]; Sec62/Sec63 complex [GO:0031207]; translocon complex [GO:0071256]	cell periphery [GO:0071944]; endoplasmic reticulum [GO:0005783]; endoplasmic reticulum membrane [GO:0005789]; rough endoplasmic reticulum membrane [GO:0030867]; Sec62/Sec63 complex [GO:0031207]; translocon complex [GO:0071256]; filamentous growth [GO:0030447]; post-translational protein targeting to membrane, translocation [GO:0031204]	SUBCELLULAR LOCATION: Endoplasmic reticulum membrane {ECO:0000269|PubMed:8257795}; Single-pass type II membrane protein {ECO:0000269|PubMed:8257795}.	TRANSMEM 28..48; /note="Helical; Signal-anchor for type II membrane protein"	TOPO_DOM 1..27; /note="Lumenal"; TOPO_DOM 49..206; /note="Cytoplasmic"		GO:0005783; GO:0005789; GO:0030447; GO:0030867; GO:0031204; GO:0031207; GO:0071256; GO:0071944	TRUE	1
Q07541	Q07541	reviewed	EXP1_YEAST	ER export of PMA1 protein 1	EXP1 YDL121C	Saccharomyces cerevisiae (strain ATCC 204508 / S288c) (Baker's yeast)	149		COPI-coated vesicle membrane [GO:0030663]; endoplasmic reticulum [GO:0005783]; endoplasmic reticulum membrane [GO:0005789]; ER to Golgi transport vesicle membrane [GO:0012507]; Golgi membrane [GO:0000139]	COPI-coated vesicle membrane [GO:0030663]; endoplasmic reticulum [GO:0005783]; endoplasmic reticulum membrane [GO:0005789]; ER to Golgi transport vesicle membrane [GO:0012507]; Golgi membrane [GO:0000139]	SUBCELLULAR LOCATION: Endoplasmic reticulum membrane {ECO:0000269|PubMed:28727280}; Single-pass type I membrane protein {ECO:0000305|PubMed:28727280}. Cytoplasmic vesicle, COPI-coated vesicle membrane {ECO:0000269|PubMed:28727280}; Single-pass type I membrane protein {ECO:0000305|PubMed:28727280}. Cytoplasmic vesicle, COPII-coated vesicle membrane {ECO:0000269|PubMed:28727280}; Single-pass type I…	TRANSMEM 7..27; /note="Helical; Signal-anchor for type II membrane protein"; /evidence="ECO:0000255"	TOPO_DOM 1..6; /note="Lumenal"; /evidence="ECO:0000305|PubMed:28727280"; TOPO_DOM 28..149; /note="Cytoplasmic"; /evidence="ECO:0000305|PubMed:28727280"		GO:0000139; GO:0005783; GO:0005789; GO:0012507; GO:0030663	TRUE	1
P38851	P38851	reviewed	LAM1_YEAST	Membrane-anchored lipid-binding protein LAM1 (Lipid transfer protein anchored at membrane contact sites 1) (Yeast suicide protein 1)	LAM1 YSP1 YHR155W	Saccharomyces cerevisiae (strain ATCC 204508 / S288c) (Baker's yeast)	1228	intracellular sterol transport [GO:0032366]	cortical endoplasmic reticulum [GO:0032541]; cytosol [GO:0005829]; endoplasmic reticulum [GO:0005783]; endoplasmic reticulum membrane [GO:0005789]; mitochondrial membrane [GO:0031966]; mitochondrion [GO:0005739]; plasma membrane [GO:0005886]	cortical endoplasmic reticulum [GO:0032541]; cytosol [GO:0005829]; endoplasmic reticulum [GO:0005783]; endoplasmic reticulum membrane [GO:0005789]; mitochondrial membrane [GO:0031966]; mitochondrion [GO:0005739]; plasma membrane [GO:0005886]; sterol transporter activity [GO:0015248]; intracellular sterol transport [GO:0032366]	SUBCELLULAR LOCATION: Mitochondrion membrane {ECO:0000269|PubMed:14562095, ECO:0000269|PubMed:15657396}; Single-pass membrane protein {ECO:0000255}. Endoplasmic reticulum membrane {ECO:0000269|PubMed:26001273}; Single-pass membrane protein {ECO:0000255}. Note=Localizes to puncta in the cell periphery representing cortical endoplasmic reticulum (cER)-plasma membrane (PM) membrane contact sites. {E…	TRANSMEM 1063..1083; /note="Helical"; /evidence="ECO:0000255"	TOPO_DOM 1..1062; /note="Cytoplasmic"; /evidence="ECO:0000305|PubMed:26001273"; TOPO_DOM 1084..1228; /note="Lumenal"; /evidence="ECO:0000250|UniProtKB:P38717"	sterol transporter activity [GO:0015248]	GO:0005739; GO:0005783; GO:0005789; GO:0005829; GO:0005886; GO:0015248; GO:0031966; GO:0032366; GO:0032541	TRUE	1
P53832	P53832	reviewed	WSC2_YEAST	Cell wall integrity and stress response component 2	WSC2 YNL283C N0583	Saccharomyces cerevisiae (strain ATCC 204508 / S288c) (Baker's yeast)	503	fungal-type cell wall organization [GO:0031505]; response to heat [GO:0009408]; Rho protein signal transduction [GO:0007266]	cellular bud [GO:0005933]; cytoplasm [GO:0005737]; fungal-type vacuole [GO:0000324]; mating projection tip [GO:0043332]; plasma membrane [GO:0005886]; site of polarized growth [GO:0030427]	cellular bud [GO:0005933]; cytoplasm [GO:0005737]; fungal-type vacuole [GO:0000324]; mating projection tip [GO:0043332]; plasma membrane [GO:0005886]; site of polarized growth [GO:0030427]; transmembrane signaling receptor activity [GO:0004888]; fungal-type cell wall organization [GO:0031505]; response to heat [GO:0009408]; Rho protein signal transduction [GO:0007266]	SUBCELLULAR LOCATION: Cell membrane; Single-pass membrane protein.	TRANSMEM 326..346; /note="Helical"; /evidence="ECO:0000255"	TOPO_DOM 24..325; /note="Extracellular"; /evidence="ECO:0000255"; TOPO_DOM 347..503; /note="Cytoplasmic"; /evidence="ECO:0000255"	transmembrane signaling receptor activity [GO:0004888]	GO:0000324; GO:0004888; GO:0005737; GO:0005886; GO:0005933; GO:0007266; GO:0009408; GO:0030427; GO:0031505; GO:0043332	TRUE	1
Q03212	Q03212	reviewed	EAR1_YEAST	Protein EAR1 (Endosomal adapter of RSP5)	EAR1 YMR171C YM8010.01C YM8520.20C	Saccharomyces cerevisiae (strain ATCC 204508 / S288c) (Baker's yeast)	550	protein transport to vacuole involved in ubiquitin-dependent protein catabolic process via the multivesicular body sorting pathway [GO:0043328]	endoplasmic reticulum [GO:0005783]; endosome [GO:0005768]; endosome membrane [GO:0010008]; vacuolar membrane [GO:0005774]	endoplasmic reticulum [GO:0005783]; endosome [GO:0005768]; endosome membrane [GO:0010008]; vacuolar membrane [GO:0005774]; protein transport to vacuole involved in ubiquitin-dependent protein catabolic process via the multivesicular body sorting pathway [GO:0043328]	SUBCELLULAR LOCATION: Endosome membrane {ECO:0000305}; Single-pass type II membrane protein {ECO:0000305}. Vacuole membrane {ECO:0000305}; Single-pass type II membrane protein {ECO:0000305}.	TRANSMEM 46..66; /note="Helical; Signal-anchor for type II membrane protein"; /evidence="ECO:0000255"	TOPO_DOM 1..45; /note="Cytoplasmic"; /evidence="ECO:0000255"; TOPO_DOM 67..550; /note="Lumenal"; /evidence="ECO:0000255"		GO:0005768; GO:0005774; GO:0005783; GO:0010008; GO:0043328	TRUE	1
Q3E824	Q3E824	reviewed	YO020_YEAST	Uncharacterized protein YOR020W-A	YOR020W-A	Saccharomyces cerevisiae (strain ATCC 204508 / S288c) (Baker's yeast)	90	proton motive force-driven ATP synthesis [GO:0015986]	mitochondrial proton-transporting ATP synthase complex, coupling factor F(o) [GO:0000276]; mitochondrion [GO:0005739]	mitochondrial proton-transporting ATP synthase complex, coupling factor F(o) [GO:0000276]; mitochondrion [GO:0005739]; proton motive force-driven ATP synthesis [GO:0015986]	SUBCELLULAR LOCATION: Mitochondrion membrane {ECO:0000269|PubMed:16823961}; Single-pass membrane protein {ECO:0000255}.	TRANSMEM 15..34; /note="Helical"; /evidence="ECO:0000255"			GO:0000276; GO:0005739; GO:0015986	TRUE	1
P36066	P36066	reviewed	MGR3L_YEAST	Protein MRG3-like	YKL133C	Saccharomyces cerevisiae (strain ATCC 204508 / S288c) (Baker's yeast)	463	protein quality control for misfolded or incompletely synthesized proteins [GO:0006515]	i-AAA complex [GO:0031942]; mitochondrion [GO:0005739]	i-AAA complex [GO:0031942]; mitochondrion [GO:0005739]; misfolded protein binding [GO:0051787]; protein quality control for misfolded or incompletely synthesized proteins [GO:0006515]	SUBCELLULAR LOCATION: Membrane {ECO:0000305}; Single-pass membrane protein {ECO:0000305}.	TRANSMEM 54..74; /note="Helical"; /evidence="ECO:0000255"		misfolded protein binding [GO:0051787]	GO:0005739; GO:0006515; GO:0031942; GO:0051787	TRUE	1
P00425	P00425	reviewed	COX5B_YEAST	Cytochrome c oxidase subunit 5B, mitochondrial (Cytochrome c oxidase polypeptide Vb)	COX5B YIL111W	Saccharomyces cerevisiae (strain ATCC 204508 / S288c) (Baker's yeast)	151	mitochondrial electron transport, cytochrome c to oxygen [GO:0006123]; proton transmembrane transport [GO:1902600]	mitochondrial respiratory chain complex IV [GO:0005751]; mitochondrion [GO:0005739]	mitochondrial respiratory chain complex IV [GO:0005751]; mitochondrion [GO:0005739]; oxidoreductase activity [GO:0016491]; mitochondrial electron transport, cytochrome c to oxygen [GO:0006123]; proton transmembrane transport [GO:1902600]	SUBCELLULAR LOCATION: Mitochondrion inner membrane {ECO:0000269|PubMed:2986105}; Single-pass membrane protein {ECO:0000250|UniProtKB:P00424}.	TRANSMEM 86..108; /note="Helical"; /evidence="ECO:0000250|UniProtKB:P00424"	TOPO_DOM 18..85; /note="Mitochondrial matrix"; /evidence="ECO:0000250|UniProtKB:P00424"; TOPO_DOM 109..151; /note="Mitochondrial intermembrane"; /evidence="ECO:0000250|UniProtKB:P00424"	oxidoreductase activity [GO:0016491]	GO:0005739; GO:0005751; GO:0006123; GO:0016491; GO:1902600	TRUE	1
Q05031	Q05031	reviewed	DFG5_YEAST	Mannan endo-1,6-alpha-mannosidase DFG5 (EC 3.2.1.101) (Endo-alpha-1->6-D-mannanase DFG5)	DFG5 YMR238W YM9959.20	Saccharomyces cerevisiae (strain ATCC 204508 / S288c) (Baker's yeast)	458	budding cell bud growth [GO:0007117]; carbohydrate catabolic process [GO:0016052]; cell wall organization [GO:0071555]; fungal-type cell wall biogenesis [GO:0009272]; pseudohyphal growth [GO:0007124]	endoplasmic reticulum [GO:0005783]; plasma membrane [GO:0005886]; side of membrane [GO:0098552]	endoplasmic reticulum [GO:0005783]; plasma membrane [GO:0005886]; side of membrane [GO:0098552]; mannan endo-1,6-alpha-mannosidase activity [GO:0008496]; budding cell bud growth [GO:0007117]; carbohydrate catabolic process [GO:0016052]; cell wall organization [GO:0071555]; fungal-type cell wall biogenesis [GO:0009272]; pseudohyphal growth [GO:0007124]	SUBCELLULAR LOCATION: Cell membrane {ECO:0000269|PubMed:12421307}; Lipid-anchor, GPI-anchor {ECO:0000269|PubMed:12421307}. Note=GPI-anchored plasma membrane protein (GPI-PMP).			mannan endo-1,6-alpha-mannosidase activity [GO:0008496]	GO:0005783; GO:0005886; GO:0007117; GO:0007124; GO:0008496; GO:0009272; GO:0016052; GO:0071555; GO:0098552	TRUE	0
P24004	P24004	reviewed	PEX1_YEAST	Peroxisomal ATPase PEX1 (EC 3.6.4.-) (Peroxin-1) (Peroxisomal assembly protein 1) (Peroxisome biogenesis protein PAS1)	PEX1 PAS1 YKL197C	Saccharomyces cerevisiae (strain ATCC 204508 / S288c) (Baker's yeast)	1043	protein import into peroxisome matrix [GO:0016558]; protein import into peroxisome matrix, receptor recycling [GO:0016562]; protein unfolding [GO:0043335]	ATPase complex [GO:1904949]; cytosol [GO:0005829]; peroxisomal membrane [GO:0005778]; peroxisome [GO:0005777]	ATPase complex [GO:1904949]; cytosol [GO:0005829]; peroxisomal membrane [GO:0005778]; peroxisome [GO:0005777]; ATP binding [GO:0005524]; ATP hydrolysis activity [GO:0016887]; protein transporter activity [GO:0140318]; protein import into peroxisome matrix [GO:0016558]; protein import into peroxisome matrix, receptor recycling [GO:0016562]; protein unfolding [GO:0043335]	SUBCELLULAR LOCATION: Cytoplasm, cytosol {ECO:0000269|PubMed:14562095}. Peroxisome membrane {ECO:0000269|PubMed:14562095}; Peripheral membrane protein {ECO:0000269|PubMed:14562095}; Cytoplasmic side {ECO:0000269|PubMed:14562095}.			ATP binding [GO:0005524]; ATP hydrolysis activity [GO:0016887]; protein transporter activity [GO:0140318]	GO:0005524; GO:0005777; GO:0005778; GO:0005829; GO:0016558; GO:0016562; GO:0016887; GO:0043335; GO:0140318; GO:1904949	TRUE	0
P36517	P36517	reviewed	RM04_YEAST	Large ribosomal subunit protein uL29m (54S ribosomal protein L4, mitochondrial) (YmL4)	MRPL4 YLR439W L9753.1	Saccharomyces cerevisiae (strain ATCC 204508 / S288c) (Baker's yeast)	319	mitochondrial translation [GO:0032543]	mitochondrial inner membrane [GO:0005743]; mitochondrial large ribosomal subunit [GO:0005762]; mitochondrion [GO:0005739]	mitochondrial inner membrane [GO:0005743]; mitochondrial large ribosomal subunit [GO:0005762]; mitochondrion [GO:0005739]; structural constituent of ribosome [GO:0003735]; mitochondrial translation [GO:0032543]	SUBCELLULAR LOCATION: Mitochondrion {ECO:0000269|PubMed:14562095, ECO:0000269|PubMed:14576278}. Note=Mitoribosomes are tethered to the mitochondrial inner membrane and spatially aligned with the membrane insertion machinery through two distinct membrane contact sites, formed by the 21S rRNA expansion segment 96-ES1 and the inner membrane protein MBA1. {ECO:0000269|PubMed:25609543}.			structural constituent of ribosome [GO:0003735]	GO:0003735; GO:0005739; GO:0005743; GO:0005762; GO:0032543	TRUE	0
P52593	P52593	reviewed	NU188_YEAST	Nucleoporin NUP188 (Nuclear pore protein NUP188)	NUP188 YML103C	Saccharomyces cerevisiae (strain ATCC 204508 / S288c) (Baker's yeast)	1655	mRNA export from nucleus in response to heat stress [GO:0031990]; nuclear pore organization [GO:0006999]; nucleocytoplasmic transport [GO:0006913]; protein import into nucleus [GO:0006606]; RNA export from nucleus [GO:0006405]	nuclear envelope [GO:0005635]; nuclear membrane [GO:0031965]; nuclear pore [GO:0005643]; nuclear pore inner ring [GO:0044611]	nuclear envelope [GO:0005635]; nuclear membrane [GO:0031965]; nuclear pore [GO:0005643]; nuclear pore inner ring [GO:0044611]; structural constituent of nuclear pore [GO:0017056]; mRNA export from nucleus in response to heat stress [GO:0031990]; nuclear pore organization [GO:0006999]; nucleocytoplasmic transport [GO:0006913]; protein import into nucleus [GO:0006606]; RNA export from nucleus [GO:0…	SUBCELLULAR LOCATION: Nucleus, nuclear pore complex {ECO:0000269|PubMed:10684247}. Nucleus membrane; Peripheral membrane protein; Cytoplasmic side. Nucleus membrane; Peripheral membrane protein; Nucleoplasmic side. Note=Symmetric distribution.			structural constituent of nuclear pore [GO:0017056]	GO:0005635; GO:0005643; GO:0006405; GO:0006606; GO:0006913; GO:0006999; GO:0017056; GO:0031965; GO:0031990; GO:0044611	TRUE	0
P38713	P38713	reviewed	OSH3_YEAST	Oxysterol-binding protein homolog 3 (Oxysterol-binding protein-related protein 3) (ORP 3) (OSBP-related protein 3)	OSH3 YHR073W	Saccharomyces cerevisiae (strain ATCC 204508 / S288c) (Baker's yeast)	996	endocytosis [GO:0006897]; ER to Golgi ceramide transport [GO:0035621]; exocytosis [GO:0006887]; invasive growth in response to glucose limitation [GO:0001403]; karyogamy involved in conjugation with cellular fusion [GO:0000742]; maintenance of cell polarity [GO:0030011]; piecemeal microautophagy of the nucleus [GO:0034727]; pseudohyphal growth [GO:0007124]; sterol transport [GO:0015918]	cortical endoplasmic reticulum [GO:0032541]; cytoplasm [GO:0005737]; cytosol [GO:0005829]; endoplasmic reticulum membrane [GO:0005789]; intracellular membrane-bounded organelle [GO:0043231]; perinuclear endoplasmic reticulum [GO:0097038]; plasma membrane [GO:0005886]	cortical endoplasmic reticulum [GO:0032541]; cytoplasm [GO:0005737]; cytosol [GO:0005829]; endoplasmic reticulum membrane [GO:0005789]; intracellular membrane-bounded organelle [GO:0043231]; perinuclear endoplasmic reticulum [GO:0097038]; plasma membrane [GO:0005886]; lipid binding [GO:0008289]; sterol binding [GO:0032934]; sterol transfer activity [GO:0120015]; sterol transporter activity [GO:00…	SUBCELLULAR LOCATION: Cytoplasm {ECO:0000269|PubMed:11408574, ECO:0000269|PubMed:12727870, ECO:0000269|PubMed:20008566}. Endoplasmic reticulum membrane {ECO:0000269|PubMed:20008566}. Note=Enriched at the cell periphery in a SCS2-dependent manner (PubMed:12727870). Enriched on regions of the ER in close proximity with the plasma membrane (PM), which may represent PM-ER membrane contact sites (MCS)…			lipid binding [GO:0008289]; sterol binding [GO:0032934]; sterol transfer activity [GO:0120015]; sterol transporter activity [GO:0015248]	GO:0000742; GO:0001403; GO:0005737; GO:0005789; GO:0005829; GO:0005886; GO:0006887; GO:0006897; GO:0007124; GO:0008289; GO:0015248; GO:0015918; GO:0030011; GO:0032541; GO:0032934; GO:0034727; GO:0035621; GO:0043231; GO:0097038; GO:0120015	TRUE	0
Q06678	Q06678	reviewed	RM35_YEAST	Large ribosomal subunit protein mL38 (54S ribosomal protein L35, mitochondrial) (YmL35)	MRPL35 YDR322W D9798.5	Saccharomyces cerevisiae (strain ATCC 204508 / S288c) (Baker's yeast)	367	mitochondrial translation [GO:0032543]	mitochondrial inner membrane [GO:0005743]; mitochondrial large ribosomal subunit [GO:0005762]; mitochondrion [GO:0005739]	mitochondrial inner membrane [GO:0005743]; mitochondrial large ribosomal subunit [GO:0005762]; mitochondrion [GO:0005739]; structural constituent of ribosome [GO:0003735]; mitochondrial translation [GO:0032543]	SUBCELLULAR LOCATION: Mitochondrion {ECO:0000269|PubMed:14562095, ECO:0000269|PubMed:14576278}. Note=Mitoribosomes are tethered to the mitochondrial inner membrane and spatially aligned with the membrane insertion machinery through two distinct membrane contact sites, formed by the 21S rRNA expansion segment 96-ES1 and the inner membrane protein MBA1. {ECO:0000269|PubMed:25609543}.			structural constituent of ribosome [GO:0003735]	GO:0003735; GO:0005739; GO:0005743; GO:0005762; GO:0032543	TRUE	0
Q12511	Q12511	reviewed	PDP1_YEAST	[Pyruvate dehydrogenase [acetyl-transferring]]-phosphatase 1, mitochondrial (PDP 1) (EC 3.1.3.43) (Phosphatase two C protein 5) (Protein phosphatase 2C homolog 5) (PP2C-5) (Protein phosphatase of PDH protein 1) (Pyruvate dehydrogenase complex phosphatase 1) (PDC phosphatase 1)	PTC5 PPP1 YOR090C YOR3157C	Saccharomyces cerevisiae (strain ATCC 204508 / S288c) (Baker's yeast)	572	peptidyl-serine dephosphorylation [GO:0070262]	mitochondrial intermembrane space [GO:0005758]; mitochondrion [GO:0005739]	mitochondrial intermembrane space [GO:0005758]; mitochondrion [GO:0005739]; [pyruvate dehydrogenase (lipoamide)] phosphatase activity [GO:0004741]; [pyruvate dehydrogenase (lipoamide)] phosphatase regulator activity [GO:0019909]; metal ion binding [GO:0046872]; protein serine/threonine phosphatase activity [GO:0004722]; peptidyl-serine dephosphorylation [GO:0070262]	SUBCELLULAR LOCATION: Mitochondrion intermembrane space {ECO:0000269|PubMed:14576278, ECO:0000269|PubMed:16643908, ECO:0000269|PubMed:22984289}.			[pyruvate dehydrogenase (lipoamide)] phosphatase activity [GO:0004741]; [pyruvate dehydrogenase (lipoamide)] phosphatase regulator activity [GO:0019909]; metal ion binding [GO:0046872]; protein serine/threonine phosphatase activity [GO:0004722]	GO:0004722; GO:0004741; GO:0005739; GO:0005758; GO:0019909; GO:0046872; GO:0070262	TRUE	0
P00431	P00431	reviewed	CCPR_YEAST	Cytochrome c peroxidase, mitochondrial (CCP) (EC 1.11.1.5)	CCP1 CCP CPO YKR066C	Saccharomyces cerevisiae (strain ATCC 204508 / S288c) (Baker's yeast)	361	cellular response to oxidative stress [GO:0034599]; hydrogen peroxide catabolic process [GO:0042744]; response to reactive oxygen species [GO:0000302]	mitochondrial intermembrane space [GO:0005758]; mitochondrial matrix [GO:0005759]; mitochondrion [GO:0005739]	mitochondrial intermembrane space [GO:0005758]; mitochondrial matrix [GO:0005759]; mitochondrion [GO:0005739]; cytochrome-c peroxidase activity [GO:0004130]; heme binding [GO:0020037]; metal ion binding [GO:0046872]; peroxidase activity [GO:0004601]; cellular response to oxidative stress [GO:0034599]; hydrogen peroxide catabolic process [GO:0042744]; response to reactive oxygen species [GO:000030…	SUBCELLULAR LOCATION: Mitochondrion matrix. Mitochondrion intermembrane space {ECO:0000269|PubMed:22984289}.			cytochrome-c peroxidase activity [GO:0004130]; heme binding [GO:0020037]; metal ion binding [GO:0046872]; peroxidase activity [GO:0004601]	GO:0000302; GO:0004130; GO:0004601; GO:0005739; GO:0005758; GO:0005759; GO:0020037; GO:0034599; GO:0042744; GO:0046872	TRUE	0
P40215	P40215	reviewed	NDH1_YEAST	External NADH-ubiquinone oxidoreductase 1, mitochondrial (EC 1.6.5.9) (External NADH dehydrogenase 1)	NDE1 NDH1 YMR145C YM9375.14C	Saccharomyces cerevisiae (strain ATCC 204508 / S288c) (Baker's yeast)	560	glycolytic fermentation to ethanol [GO:0019655]; NADH oxidation [GO:0006116]; regulation of apoptotic process [GO:0042981]	mitochondrial intermembrane space [GO:0005758]; mitochondrial membrane [GO:0031966]; mitochondrion [GO:0005739]	mitochondrial intermembrane space [GO:0005758]; mitochondrial membrane [GO:0031966]; mitochondrion [GO:0005739]; NADH dehydrogenase (quinone) activity [GO:0050136]; NADH dehydrogenase activity [GO:0003954]; glycolytic fermentation to ethanol [GO:0019655]; NADH oxidation [GO:0006116]; regulation of apoptotic process [GO:0042981]	SUBCELLULAR LOCATION: Mitochondrion intermembrane space {ECO:0000269|PubMed:14576278}.			NADH dehydrogenase (quinone) activity [GO:0050136]; NADH dehydrogenase activity [GO:0003954]	GO:0003954; GO:0005739; GO:0005758; GO:0006116; GO:0019655; GO:0031966; GO:0042981; GO:0050136	TRUE	0
Q06705	Q06705	reviewed	CSR1_YEAST	Phosphatidylinositol transfer protein CSR1 (CHS5 SPA2 rescue protein 1) (SEC14 homolog protein 2)	CSR1 SFH2 YLR380W	Saccharomyces cerevisiae (strain ATCC 204508 / S288c) (Baker's yeast)	408	Golgi to plasma membrane protein transport [GO:0043001]; Golgi to plasma membrane transport [GO:0006893]; negative regulation of fatty acid biosynthetic process [GO:0045717]; negative regulation of phosphatidylglycerol biosynthetic process [GO:1901352]; phosphatidylinositol metabolic process [GO:0046488]; phospholipid catabolic process [GO:0009395]; phospholipid transport [GO:0015914]; positive r…	cytosol [GO:0005829]; endoplasmic reticulum [GO:0005783]; endosome [GO:0005768]; lipid droplet [GO:0005811]; mitochondrion [GO:0005739]; prospore membrane [GO:0005628]	cytosol [GO:0005829]; endoplasmic reticulum [GO:0005783]; endosome [GO:0005768]; lipid droplet [GO:0005811]; mitochondrion [GO:0005739]; prospore membrane [GO:0005628]; phosphatidylinositol transfer activity [GO:0008526]; Golgi to plasma membrane protein transport [GO:0043001]; Golgi to plasma membrane transport [GO:0006893]; negative regulation of fatty acid biosynthetic process [GO:0045717]; ne…	SUBCELLULAR LOCATION: Cytoplasm {ECO:0000269|PubMed:12869188}. Microsome {ECO:0000269|PubMed:12869188}. Endosome {ECO:0000269|PubMed:10848624}.			phosphatidylinositol transfer activity [GO:0008526]	GO:0005628; GO:0005739; GO:0005768; GO:0005783; GO:0005811; GO:0005829; GO:0006893; GO:0008526; GO:0009395; GO:0015914; GO:0043001; GO:0045717; GO:0046488; GO:1901352; GO:2001247	TRUE	0
P25626	P25626	reviewed	IMG1_YEAST	Large ribosomal subunit protein bL19m (54S ribosomal protein IMG1, mitochondrial) (Integrity of mitochondrial genome protein 1) (PetCR46)	IMG1 PETCR46 YCR046C YCR46C	Saccharomyces cerevisiae (strain ATCC 204508 / S288c) (Baker's yeast)	169	mitochondrial translation [GO:0032543]	mitochondrial inner membrane [GO:0005743]; mitochondrial large ribosomal subunit [GO:0005762]; mitochondrion [GO:0005739]	mitochondrial inner membrane [GO:0005743]; mitochondrial large ribosomal subunit [GO:0005762]; mitochondrion [GO:0005739]; structural constituent of ribosome [GO:0003735]; mitochondrial translation [GO:0032543]	SUBCELLULAR LOCATION: Mitochondrion {ECO:0000269|PubMed:14562095, ECO:0000269|PubMed:14576278}. Note=Mitoribosomes are tethered to the mitochondrial inner membrane and spatially aligned with the membrane insertion machinery through two distinct membrane contact sites, formed by the 21S rRNA expansion segment 96-ES1 and the inner membrane protein MBA1. {ECO:0000269|PubMed:25609543}.			structural constituent of ribosome [GO:0003735]	GO:0003735; GO:0005739; GO:0005743; GO:0005762; GO:0032543	TRUE	0
P00128	P00128	reviewed	QCR7_YEAST	Cytochrome b-c1 complex subunit 7, mitochondrial (Complex III subunit 7) (Complex III subunit VII) (Ubiquinol-cytochrome c oxidoreductase subunit 7) (Ubiquinol-cytochrome c reductase 14 kDa protein)	QCR7 CRO1 UCR7 YDR529C D9719.32	Saccharomyces cerevisiae (strain ATCC 204508 / S288c) (Baker's yeast)	127	aerobic respiration [GO:0009060]; cellular respiration [GO:0045333]; mitochondrial electron transport, ubiquinol to cytochrome c [GO:0006122]; mitochondrial respiratory chain complex III assembly [GO:0034551]; proton transmembrane transport [GO:1902600]	matrix side of mitochondrial inner membrane [GO:0099617]; mitochondrial inner membrane [GO:0005743]; mitochondrial respiratory chain complex III [GO:0005750]; mitochondrion [GO:0005739]	matrix side of mitochondrial inner membrane [GO:0099617]; mitochondrial inner membrane [GO:0005743]; mitochondrial respiratory chain complex III [GO:0005750]; mitochondrion [GO:0005739]; aerobic respiration [GO:0009060]; cellular respiration [GO:0045333]; mitochondrial electron transport, ubiquinol to cytochrome c [GO:0006122]; mitochondrial respiratory chain complex III assembly [GO:0034551]; pr…	SUBCELLULAR LOCATION: Mitochondrion inner membrane {ECO:0000269|PubMed:18390544, ECO:0000269|PubMed:30598554}; Peripheral membrane protein {ECO:0000269|PubMed:18390544, ECO:0000269|PubMed:30598554}; Matrix side {ECO:0000269|PubMed:18390544, ECO:0000269|PubMed:30598554}.				GO:0005739; GO:0005743; GO:0005750; GO:0006122; GO:0009060; GO:0034551; GO:0045333; GO:0099617; GO:1902600	TRUE	0
Q07872	Q07872	reviewed	ENT4_YEAST	Epsin-4	ENT4 YLL038C	Saccharomyces cerevisiae (strain ATCC 204508 / S288c) (Baker's yeast)	247	actin cortical patch assembly [GO:0000147]; actin filament organization [GO:0007015]; endocytosis [GO:0006897]; protein localization to plasma membrane [GO:0072659]	actin cortical patch [GO:0030479]; clathrin vesicle coat [GO:0030125]; cytosol [GO:0005829]; endosome [GO:0005768]; plasma membrane [GO:0005886]	actin cortical patch [GO:0030479]; clathrin vesicle coat [GO:0030125]; cytosol [GO:0005829]; endosome [GO:0005768]; plasma membrane [GO:0005886]; clathrin binding [GO:0030276]; phospholipid binding [GO:0005543]; actin cortical patch assembly [GO:0000147]; actin filament organization [GO:0007015]; endocytosis [GO:0006897]; protein localization to plasma membrane [GO:0072659]				clathrin binding [GO:0030276]; phospholipid binding [GO:0005543]	GO:0000147; GO:0005543; GO:0005768; GO:0005829; GO:0005886; GO:0006897; GO:0007015; GO:0030125; GO:0030276; GO:0030479; GO:0072659	TRUE	0
P32191	P32191	reviewed	GPDM_YEAST	Glycerol-3-phosphate dehydrogenase, mitochondrial (GPD-M) (GPDH-M) (EC 1.1.5.3)	GUT2 YIL155C	Saccharomyces cerevisiae (strain ATCC 204508 / S288c) (Baker's yeast)	649	glycerol catabolic process [GO:0019563]; glycerol metabolic process [GO:0006071]; glycerol-3-phosphate metabolic process [GO:0006072]; NADH oxidation [GO:0006116]	glycerol-3-phosphate dehydrogenase complex [GO:0009331]; mitochondrial inner membrane [GO:0005743]; mitochondrial intermembrane space [GO:0005758]; mitochondrial outer membrane [GO:0005741]; mitochondrion [GO:0005739]	glycerol-3-phosphate dehydrogenase complex [GO:0009331]; mitochondrial inner membrane [GO:0005743]; mitochondrial intermembrane space [GO:0005758]; mitochondrial outer membrane [GO:0005741]; mitochondrion [GO:0005739]; glycerol-3-phosphate dehydrogenase (quinone) activity [GO:0004368]; sn-glycerol-3-phosphate:ubiquinone-8 oxidoreductase activity [GO:0052591]; glycerol catabolic process [GO:001956…	SUBCELLULAR LOCATION: Mitochondrion inner membrane {ECO:0000269|PubMed:11502169}. Mitochondrion intermembrane space {ECO:0000269|PubMed:22984289}.			glycerol-3-phosphate dehydrogenase (quinone) activity [GO:0004368]; sn-glycerol-3-phosphate:ubiquinone-8 oxidoreductase activity [GO:0052591]	GO:0004368; GO:0005739; GO:0005741; GO:0005743; GO:0005758; GO:0006071; GO:0006072; GO:0006116; GO:0009331; GO:0019563; GO:0052591	TRUE	0
Q03674	Q03674	reviewed	PLB2_YEAST	Lysophospholipase 2 (EC 3.1.1.5) (Phospholipase B 2)	PLB2 YMR006C YM8270.08C	Saccharomyces cerevisiae (strain ATCC 204508 / S288c) (Baker's yeast)	706	glycerophospholipid catabolic process [GO:0046475]; glycerophospholipid metabolic process [GO:0006650]	cell periphery [GO:0071944]; cytosol [GO:0005829]; extracellular region [GO:0005576]; fungal-type cell wall [GO:0009277]; intracellular membrane-bounded organelle [GO:0043231]; plasma membrane [GO:0005886]; side of membrane [GO:0098552]	cell periphery [GO:0071944]; cytosol [GO:0005829]; extracellular region [GO:0005576]; fungal-type cell wall [GO:0009277]; intracellular membrane-bounded organelle [GO:0043231]; plasma membrane [GO:0005886]; side of membrane [GO:0098552]; lysophospholipase activity [GO:0004622]; phosphatidyl phospholipase B activity [GO:0102545]; phospholipase A2 activity [GO:0004623]; glycerophospholipid cataboli…	SUBCELLULAR LOCATION: Secreted, cell wall. Membrane; Lipid-anchor, GPI-anchor. Note=Covalently-linked GPI-modified cell wall protein (GPI-CWP).			lysophospholipase activity [GO:0004622]; phosphatidyl phospholipase B activity [GO:0102545]; phospholipase A2 activity [GO:0004623]	GO:0004622; GO:0004623; GO:0005576; GO:0005829; GO:0005886; GO:0006650; GO:0009277; GO:0043231; GO:0046475; GO:0071944; GO:0098552; GO:0102545	TRUE	0
P48563	P48563	reviewed	MON2_YEAST	Protein MON2	MON2 YSL2 YNL297C N0453	Saccharomyces cerevisiae (strain ATCC 204508 / S288c) (Baker's yeast)	1636	endocytosis [GO:0006897]; Golgi to endosome transport [GO:0006895]; protein targeting to vacuole [GO:0006623]; retrograde transport, endosome to Golgi [GO:0042147]; trans-Golgi network membrane organization [GO:0098629]	cytosol [GO:0005829]; early endosome membrane [GO:0031901]; endosome [GO:0005768]; endosome membrane [GO:0010008]; Golgi apparatus [GO:0005794]; Golgi membrane [GO:0000139]; trans-Golgi network [GO:0005802]	cytosol [GO:0005829]; early endosome membrane [GO:0031901]; endosome [GO:0005768]; endosome membrane [GO:0010008]; Golgi apparatus [GO:0005794]; Golgi membrane [GO:0000139]; trans-Golgi network [GO:0005802]; guanyl-nucleotide exchange factor activity [GO:0005085]; endocytosis [GO:0006897]; Golgi to endosome transport [GO:0006895]; protein targeting to vacuole [GO:0006623]; retrograde transport, e…	SUBCELLULAR LOCATION: Golgi apparatus membrane {ECO:0000269|PubMed:12052896, ECO:0000269|PubMed:16219684, ECO:0000269|PubMed:16301316}; Peripheral membrane protein {ECO:0000269|PubMed:12052896, ECO:0000269|PubMed:16219684, ECO:0000269|PubMed:16301316}. Note=Late Golgi.			guanyl-nucleotide exchange factor activity [GO:0005085]	GO:0000139; GO:0005085; GO:0005768; GO:0005794; GO:0005802; GO:0005829; GO:0006623; GO:0006895; GO:0006897; GO:0010008; GO:0031901; GO:0042147; GO:0098629	TRUE	0
P47140	P47140	reviewed	AIM25_YEAST	Altered inheritance rate of mitochondria protein 25	AIM25 YJR100C J1946	Saccharomyces cerevisiae (strain ATCC 204508 / S288c) (Baker's yeast)	327	cellular response to heat [GO:0034605]; cellular response to oxidative stress [GO:0034599]; negative regulation of autophagy of mitochondrion [GO:1903147]; plasma membrane phospholipid scrambling [GO:0017121]	mitochondrion [GO:0005739]; plasma membrane [GO:0005886]	mitochondrion [GO:0005739]; plasma membrane [GO:0005886]; phospholipid scramblase activity [GO:0017128]; cellular response to heat [GO:0034605]; cellular response to oxidative stress [GO:0034599]; negative regulation of autophagy of mitochondrion [GO:1903147]; plasma membrane phospholipid scrambling [GO:0017121]	SUBCELLULAR LOCATION: Mitochondrion {ECO:0000269|PubMed:16823961}.			phospholipid scramblase activity [GO:0017128]	GO:0005739; GO:0005886; GO:0017121; GO:0017128; GO:0034599; GO:0034605; GO:1903147	TRUE	0
P53894	P53894	reviewed	CBK1_YEAST	Serine/threonine-protein kinase CBK1 (EC 2.7.11.1) (Cell wall biosynthesis kinase)	CBK1 YNL161W N1727	Saccharomyces cerevisiae (strain ATCC 204508 / S288c) (Baker's yeast)	756	budding cell apical bud growth [GO:0007118]; establishment or maintenance of actin cytoskeleton polarity [GO:0030950]; establishment or maintenance of cell polarity [GO:0007163]; intracellular signal transduction [GO:0035556]; phosphorylation [GO:0016310]; regulation of fungal-type cell wall organization [GO:0060237]; regulation of protein secretion [GO:0050708]; septum digestion after cytokinesi…	cell cortex [GO:0005938]; cellular bud [GO:0005933]; cellular bud neck [GO:0005935]; cellular bud tip [GO:0005934]; cytoplasm [GO:0005737]; cytoplasmic stress granule [GO:0010494]; incipient cellular bud site [GO:0000131]; mating projection tip [GO:0043332]; nucleus [GO:0005634]; prospore membrane [GO:0005628]; serine/threonine protein kinase complex [GO:1902554]	cell cortex [GO:0005938]; cellular bud [GO:0005933]; cellular bud neck [GO:0005935]; cellular bud tip [GO:0005934]; cytoplasm [GO:0005737]; cytoplasmic stress granule [GO:0010494]; incipient cellular bud site [GO:0000131]; mating projection tip [GO:0043332]; nucleus [GO:0005634]; prospore membrane [GO:0005628]; serine/threonine protein kinase complex [GO:1902554]; ATP binding [GO:0005524]; identi…				ATP binding [GO:0005524]; identical protein binding [GO:0042802]; protein serine kinase activity [GO:0106310]; protein serine/threonine kinase activity [GO:0004674]	GO:0000131; GO:0000920; GO:0004674; GO:0005524; GO:0005628; GO:0005634; GO:0005737; GO:0005933; GO:0005934; GO:0005935; GO:0005938; GO:0007118; GO:0007163; GO:0010494; GO:0016310; GO:0030950; GO:0035556; GO:0042802; GO:0043332; GO:0050708; GO:0060237; GO:0106310; GO:1902554	TRUE	0
P38234	P38234	reviewed	RFS1_YEAST	Protein RFS1 (RAD55 suppressor protein 1)	RFS1 YBR052C YBR0505	Saccharomyces cerevisiae (strain ATCC 204508 / S288c) (Baker's yeast)	210		cytoplasm [GO:0005737]; membrane [GO:0016020]; membrane raft [GO:0045121]	cytoplasm [GO:0005737]; membrane [GO:0016020]; membrane raft [GO:0045121]; FMN binding [GO:0010181]	SUBCELLULAR LOCATION: Cytoplasm {ECO:0000269|PubMed:14562095}. Membrane raft {ECO:0000269|PubMed:19064668}.			FMN binding [GO:0010181]	GO:0005737; GO:0010181; GO:0016020; GO:0045121	TRUE	0
P00360	P00360	reviewed	G3P1_YEAST	Glyceraldehyde-3-phosphate dehydrogenase 1 (GAPDH 1) (EC 1.2.1.12) (Triose-phosphate dehydrogenase 1)	TDH1 GPD1 SSS2 YJL052W J1154	Saccharomyces cerevisiae (strain ATCC 204508 / S288c) (Baker's yeast)	332	gluconeogenesis [GO:0006094]; glycolytic process [GO:0006096]	cytosol [GO:0005829]; fungal-type cell wall [GO:0009277]; lipid droplet [GO:0005811]; mitochondrion [GO:0005739]; plasma membrane [GO:0005886]	cytosol [GO:0005829]; fungal-type cell wall [GO:0009277]; lipid droplet [GO:0005811]; mitochondrion [GO:0005739]; plasma membrane [GO:0005886]; glyceraldehyde-3-phosphate dehydrogenase (NAD+) (phosphorylating) activity [GO:0004365]; melatonin binding [GO:1904408]; NAD binding [GO:0051287]; NADP binding [GO:0050661]; gluconeogenesis [GO:0006094]; glycolytic process [GO:0006096]	SUBCELLULAR LOCATION: Cytoplasm {ECO:0000269|PubMed:11502169}.			glyceraldehyde-3-phosphate dehydrogenase (NAD+) (phosphorylating) activity [GO:0004365]; melatonin binding [GO:1904408]; NAD binding [GO:0051287]; NADP binding [GO:0050661]	GO:0004365; GO:0005739; GO:0005811; GO:0005829; GO:0005886; GO:0006094; GO:0006096; GO:0009277; GO:0050661; GO:0051287; GO:1904408	TRUE	0
P30619	P30619	reviewed	SEC1_YEAST	Protein transport protein SEC1	SEC1 YDR164C YD8358.18C	Saccharomyces cerevisiae (strain ATCC 204508 / S288c) (Baker's yeast)	724	exocytosis [GO:0006887]; intracellular protein transport [GO:0006886]; positive regulation of vesicle fusion [GO:0031340]; vesicle docking involved in exocytosis [GO:0006904]; vesicle-mediated transport [GO:0016192]	cell periphery [GO:0071944]; cellular bud neck [GO:0005935]; cellular bud tip [GO:0005934]; plasma membrane [GO:0005886]	cell periphery [GO:0071944]; cellular bud neck [GO:0005935]; cellular bud tip [GO:0005934]; plasma membrane [GO:0005886]; SNARE binding [GO:0000149]; syntaxin binding [GO:0019905]; exocytosis [GO:0006887]; intracellular protein transport [GO:0006886]; positive regulation of vesicle fusion [GO:0031340]; vesicle docking involved in exocytosis [GO:0006904]; vesicle-mediated transport [GO:0016192]				SNARE binding [GO:0000149]; syntaxin binding [GO:0019905]	GO:0000149; GO:0005886; GO:0005934; GO:0005935; GO:0006886; GO:0006887; GO:0006904; GO:0016192; GO:0019905; GO:0031340; GO:0071944	TRUE	0
P38330	P38330	reviewed	RMD9L_YEAST	RNA-binding protein RMD9-like, mitochondrial	YBR238C YBR1608	Saccharomyces cerevisiae (strain ATCC 204508 / S288c) (Baker's yeast)	731	aerobic respiration [GO:0009060]	cytoplasm [GO:0005737]; mitochondrial inner membrane [GO:0005743]; mitochondrial membrane [GO:0031966]; mitochondrion [GO:0005739]; P-body [GO:0000932]	cytoplasm [GO:0005737]; mitochondrial inner membrane [GO:0005743]; mitochondrial membrane [GO:0031966]; mitochondrion [GO:0005739]; P-body [GO:0000932]; mRNA binding [GO:0003729]; aerobic respiration [GO:0009060]	SUBCELLULAR LOCATION: Mitochondrion inner membrane {ECO:0000250|UniProtKB:P53140}; Peripheral membrane protein {ECO:0000250|UniProtKB:P53140}; Matrix side {ECO:0000250|UniProtKB:P53140}.			mRNA binding [GO:0003729]	GO:0000932; GO:0003729; GO:0005737; GO:0005739; GO:0005743; GO:0009060; GO:0031966	TRUE	0
P57744	P57744	reviewed	TIM8_YEAST	Mitochondrial import inner membrane translocase subunit TIM8	TIM8 YJR135W-A YJR135BW	Saccharomyces cerevisiae (strain ATCC 204508 / S288c) (Baker's yeast)	87	protein insertion into mitochondrial inner membrane [GO:0045039]	mitochondrial inner membrane [GO:0005743]; mitochondrial intermembrane space [GO:0005758]; mitochondrial intermembrane space protein transporter complex [GO:0042719]; mitochondrion [GO:0005739]	mitochondrial inner membrane [GO:0005743]; mitochondrial intermembrane space [GO:0005758]; mitochondrial intermembrane space protein transporter complex [GO:0042719]; mitochondrion [GO:0005739]; metal ion binding [GO:0046872]; protein transporter activity [GO:0140318]; protein insertion into mitochondrial inner membrane [GO:0045039]	SUBCELLULAR LOCATION: Mitochondrion inner membrane {ECO:0000269|PubMed:10397776, ECO:0000269|PubMed:10469659, ECO:0000269|PubMed:16823961}; Peripheral membrane protein {ECO:0000269|PubMed:10397776, ECO:0000269|PubMed:10469659, ECO:0000269|PubMed:16823961}; Intermembrane side {ECO:0000269|PubMed:10397776, ECO:0000269|PubMed:10469659}. Mitochondrion intermembrane space {ECO:0000269|PubMed:22984289}…			metal ion binding [GO:0046872]; protein transporter activity [GO:0140318]	GO:0005739; GO:0005743; GO:0005758; GO:0042719; GO:0045039; GO:0046872; GO:0140318	TRUE	0
P48559	P48559	reviewed	YPT11_YEAST	GTP-binding protein YPT11 (Rab GTPase YPT11)	YPT11 YNL304W N0410	Saccharomyces cerevisiae (strain ATCC 204508 / S288c) (Baker's yeast)	417	intracellular protein transport [GO:0006886]; lipid droplet organization [GO:0034389]; mitochondrion localization [GO:0051646]	cellular bud neck [GO:0005935]; cellular bud tip [GO:0005934]; endomembrane system [GO:0012505]; endoplasmic reticulum [GO:0005783]; endoplasmic reticulum membrane [GO:0005789]; Golgi apparatus [GO:0005794]; incipient cellular bud site [GO:0000131]	cellular bud neck [GO:0005935]; cellular bud tip [GO:0005934]; endomembrane system [GO:0012505]; endoplasmic reticulum [GO:0005783]; endoplasmic reticulum membrane [GO:0005789]; Golgi apparatus [GO:0005794]; incipient cellular bud site [GO:0000131]; GTP binding [GO:0005525]; GTPase activity [GO:0003924]; intracellular protein transport [GO:0006886]; lipid droplet organization [GO:0034389]; mitoch…	SUBCELLULAR LOCATION: Endoplasmic reticulum membrane {ECO:0000269|PubMed:16980630}; Lipid-anchor {ECO:0000269|PubMed:16980630}; Cytoplasmic side {ECO:0000269|PubMed:16980630}. Bud tip {ECO:0000269|PubMed:16980630}. Bud neck {ECO:0000269|PubMed:16980630}. Note=Enriched in the peripheral ER of small buds and daughter cells. Concentrates at the site of bud emergence, at the bud tip of the growing bu…			GTP binding [GO:0005525]; GTPase activity [GO:0003924]	GO:0000131; GO:0003924; GO:0005525; GO:0005783; GO:0005789; GO:0005794; GO:0005934; GO:0005935; GO:0006886; GO:0012505; GO:0034389; GO:0051646	TRUE	0
Q03976	Q03976	reviewed	RT24_YEAST	Small ribosomal subunit protein mS35 (37S ribosomal protein S24, mitochondrial) (Mitochondrial ribosomal small subunit protein 24)	RSM24 YDR175C	Saccharomyces cerevisiae (strain ATCC 204508 / S288c) (Baker's yeast)	319	mitochondrial translation [GO:0032543]	mitochondrial inner membrane [GO:0005743]; mitochondrial small ribosomal subunit [GO:0005763]; mitochondrion [GO:0005739]	mitochondrial inner membrane [GO:0005743]; mitochondrial small ribosomal subunit [GO:0005763]; mitochondrion [GO:0005739]; structural constituent of ribosome [GO:0003735]; mitochondrial translation [GO:0032543]	SUBCELLULAR LOCATION: Mitochondrion {ECO:0000269|PubMed:11278769, ECO:0000269|PubMed:14562095, ECO:0000269|PubMed:14576278}. Note=Mitoribosomes are tethered to the mitochondrial inner membrane and spatially aligned with the membrane insertion machinery through two distinct membrane contact sites, formed by the 21S rRNA expansion segment 96-ES1 and the inner membrane protein MBA1. {ECO:0000269|Pub…			structural constituent of ribosome [GO:0003735]	GO:0003735; GO:0005739; GO:0005743; GO:0005763; GO:0032543	TRUE	0
P41735	P41735	reviewed	COQ7_YEAST	5-demethoxyubiquinone hydroxylase, mitochondrial (DMQ hydroxylase) (EC 1.14.99.60) (Catabolite repression protein 5) (Ubiquinone biosynthesis monooxygenase COQ7)	CAT5 COQ7 YOR125C O3284 YOR3284C	Saccharomyces cerevisiae (strain ATCC 204508 / S288c) (Baker's yeast)	233	ubiquinone biosynthetic process [GO:0006744]	extrinsic component of mitochondrial inner membrane [GO:0031314]; mitochondrial inner membrane [GO:0005743]; mitochondrion [GO:0005739]	extrinsic component of mitochondrial inner membrane [GO:0031314]; mitochondrial inner membrane [GO:0005743]; mitochondrion [GO:0005739]; 3-demethoxyubiquinol 3-hydroxylase activity [GO:0008682]; metal ion binding [GO:0046872]; monooxygenase activity [GO:0004497]; oxidoreductase activity, acting on paired donors, with incorporation or reduction of molecular oxygen, NAD(P)H as one donor, and incorp…	SUBCELLULAR LOCATION: Mitochondrion inner membrane {ECO:0000255|HAMAP-Rule:MF_03194, ECO:0000269|PubMed:14576278, ECO:0000269|PubMed:24406904, ECO:0000269|PubMed:9452453}; Peripheral membrane protein {ECO:0000255|HAMAP-Rule:MF_03194, ECO:0000269|PubMed:24406904}; Matrix side {ECO:0000255|HAMAP-Rule:MF_03194, ECO:0000269|PubMed:24406904}.			3-demethoxyubiquinol 3-hydroxylase activity [GO:0008682]; metal ion binding [GO:0046872]; monooxygenase activity [GO:0004497]; oxidoreductase activity, acting on paired donors, with incorporation or reduction of molecular oxygen, NAD(P)H as one donor, and incorporation of one atom of oxygen [GO:0016709]	GO:0004497; GO:0005739; GO:0005743; GO:0006744; GO:0008682; GO:0016709; GO:0031314; GO:0046872	TRUE	0
P21306	P21306	reviewed	ATP5E_YEAST	ATP synthase subunit epsilon, mitochondrial (ATPase subunit epsilon)	ATP15 YPL271W P0345	Saccharomyces cerevisiae (strain ATCC 204508 / S288c) (Baker's yeast)	62	proton motive force-driven ATP synthesis [GO:0015986]; proton motive force-driven mitochondrial ATP synthesis [GO:0042776]	mitochondrial inner membrane [GO:0005743]; mitochondrial proton-transporting ATP synthase complex [GO:0005753]; mitochondrial proton-transporting ATP synthase, central stalk [GO:0005756]; mitochondrion [GO:0005739]; proton-transporting ATP synthase complex, catalytic core F(1) [GO:0045261]	mitochondrial inner membrane [GO:0005743]; mitochondrial proton-transporting ATP synthase complex [GO:0005753]; mitochondrial proton-transporting ATP synthase, central stalk [GO:0005756]; mitochondrion [GO:0005739]; proton-transporting ATP synthase complex, catalytic core F(1) [GO:0045261]; proton-transporting ATP synthase activity, rotational mechanism [GO:0046933]; proton motive force-driven AT…	SUBCELLULAR LOCATION: Mitochondrion. Mitochondrion inner membrane.			proton-transporting ATP synthase activity, rotational mechanism [GO:0046933]	GO:0005739; GO:0005743; GO:0005753; GO:0005756; GO:0015986; GO:0042776; GO:0045261; GO:0046933	TRUE	0
Q00873	Q00873	reviewed	CYT2_YEAST	Holocytochrome-c1 synthase (EC 4.4.1.17) (Cytochrome c1 heme lyase) (CC1HL)	CYT2 YKL087C	Saccharomyces cerevisiae (strain ATCC 204508 / S288c) (Baker's yeast)	224	cytochrome c-heme linkage [GO:0018063]	mitochondrial inner membrane [GO:0005743]; mitochondrial intermembrane space [GO:0005758]; mitochondrion [GO:0005739]	mitochondrial inner membrane [GO:0005743]; mitochondrial intermembrane space [GO:0005758]; mitochondrion [GO:0005739]; holocytochrome-c synthase activity [GO:0004408]; metal ion binding [GO:0046872]; cytochrome c-heme linkage [GO:0018063]	SUBCELLULAR LOCATION: Mitochondrion inner membrane {ECO:0000269|PubMed:1499554}. Note=Partially exposed to the intermembrane space. {ECO:0000305|PubMed:1499554}.			holocytochrome-c synthase activity [GO:0004408]; metal ion binding [GO:0046872]	GO:0004408; GO:0005739; GO:0005743; GO:0005758; GO:0018063; GO:0046872	TRUE	0
P32855	P32855	reviewed	SEC8_YEAST	Exocyst complex component SEC8	SEC8 YPR055W YP9499.11	Saccharomyces cerevisiae (strain ATCC 204508 / S288c) (Baker's yeast)	1065	endoplasmic reticulum inheritance [GO:0048309]; exocytosis [GO:0006887]; Golgi inheritance [GO:0048313]; Golgi to plasma membrane transport [GO:0006893]; protein transport [GO:0015031]; vesicle docking involved in exocytosis [GO:0006904]; vesicle tethering involved in exocytosis [GO:0090522]	cellular bud neck [GO:0005935]; cellular bud tip [GO:0005934]; cytoplasm [GO:0005737]; exocyst [GO:0000145]; incipient cellular bud site [GO:0000131]; mating projection tip [GO:0043332]; plasma membrane [GO:0005886]; prospore membrane [GO:0005628]	cellular bud neck [GO:0005935]; cellular bud tip [GO:0005934]; cytoplasm [GO:0005737]; exocyst [GO:0000145]; incipient cellular bud site [GO:0000131]; mating projection tip [GO:0043332]; plasma membrane [GO:0005886]; prospore membrane [GO:0005628]; endoplasmic reticulum inheritance [GO:0048309]; exocytosis [GO:0006887]; Golgi inheritance [GO:0048313]; Golgi to plasma membrane transport [GO:000689…	SUBCELLULAR LOCATION: Cytoplasm. Cell membrane; Peripheral membrane protein. Note=75% cytoplasmic. 25% associated with the cell membrane.				GO:0000131; GO:0000145; GO:0005628; GO:0005737; GO:0005886; GO:0005934; GO:0005935; GO:0006887; GO:0006893; GO:0006904; GO:0015031; GO:0043332; GO:0048309; GO:0048313; GO:0090522	TRUE	0
Q06839	Q06839	reviewed	YP097_YEAST	PX domain-containing protein YPR097W	YPR097W	Saccharomyces cerevisiae (strain ATCC 204508 / S288c) (Baker's yeast)	1073		mitochondrial membrane [GO:0031966]; mitochondrion [GO:0005739]	mitochondrial membrane [GO:0031966]; mitochondrion [GO:0005739]; phosphatidylinositol binding [GO:0035091]	SUBCELLULAR LOCATION: Mitochondrion membrane {ECO:0000305}; Peripheral membrane protein {ECO:0000305}.			phosphatidylinositol binding [GO:0035091]	GO:0005739; GO:0031966; GO:0035091	TRUE	0
Q12091	Q12091	reviewed	DAP1_YEAST	Damage response protein 1	DAP1 YPL170W P2515	Saccharomyces cerevisiae (strain ATCC 204508 / S288c) (Baker's yeast)	152	regulation of ergosterol biosynthetic process [GO:0032443]	endomembrane system [GO:0012505]; endoplasmic reticulum [GO:0005783]; endosome [GO:0005768]; membrane [GO:0016020]	endomembrane system [GO:0012505]; endoplasmic reticulum [GO:0005783]; endosome [GO:0005768]; membrane [GO:0016020]; heme binding [GO:0020037]; regulation of ergosterol biosynthetic process [GO:0032443]				heme binding [GO:0020037]	GO:0005768; GO:0005783; GO:0012505; GO:0016020; GO:0020037; GO:0032443	TRUE	0
P33760	P33760	reviewed	PEX6_YEAST	Peroxisomal ATPase PEX6 (EC 3.6.4.-) (Peroxin-6) (Peroxisomal assembly protein 8)	PEX6 PAS8 YNL329C N0310	Saccharomyces cerevisiae (strain ATCC 204508 / S288c) (Baker's yeast)	1030	protein import into peroxisome matrix [GO:0016558]; protein import into peroxisome matrix, receptor recycling [GO:0016562]; protein unfolding [GO:0043335]	ATPase complex [GO:1904949]; cytosol [GO:0005829]; peroxisomal membrane [GO:0005778]; peroxisome [GO:0005777]	ATPase complex [GO:1904949]; cytosol [GO:0005829]; peroxisomal membrane [GO:0005778]; peroxisome [GO:0005777]; ATP binding [GO:0005524]; ATP hydrolysis activity [GO:0016887]; protein transporter activity [GO:0140318]; protein import into peroxisome matrix [GO:0016558]; protein import into peroxisome matrix, receptor recycling [GO:0016562]; protein unfolding [GO:0043335]	SUBCELLULAR LOCATION: Cytoplasm, cytosol {ECO:0000269|PubMed:12808025}. Peroxisome membrane {ECO:0000269|PubMed:12808025, ECO:0000269|PubMed:14562095}; Peripheral membrane protein {ECO:0000269|PubMed:12808025}; Cytoplasmic side {ECO:0000269|PubMed:12808025}. Note=Associated with peroxisomal membranes; anchored by PEX15 to peroxisome membranes. {ECO:0000269|PubMed:12808025}.			ATP binding [GO:0005524]; ATP hydrolysis activity [GO:0016887]; protein transporter activity [GO:0140318]	GO:0005524; GO:0005777; GO:0005778; GO:0005829; GO:0016558; GO:0016562; GO:0016887; GO:0043335; GO:0140318; GO:1904949	TRUE	0
P40581	P40581	reviewed	GPX3_YEAST	Glutathione peroxidase-like peroxiredoxin HYR1 (EC 1.11.1.24) (Glutathione peroxidase homolog 3) (GPx 3) (Hydrogen peroxide resistance protein 1) (Oxidant receptor peroxidase 1) (Phospholipid hydroperoxide glutathione peroxidase 3) (PHGPx3)	HYR1 GPX3 ORP1 YIR037W	Saccharomyces cerevisiae (strain ATCC 204508 / S288c) (Baker's yeast)	163	cellular response to oxidative stress [GO:0034599]	cytosol [GO:0005829]; mitochondrial intermembrane space [GO:0005758]; mitochondrion [GO:0005739]; peroxisomal matrix [GO:0005782]	cytosol [GO:0005829]; mitochondrial intermembrane space [GO:0005758]; mitochondrion [GO:0005739]; peroxisomal matrix [GO:0005782]; glutathione peroxidase activity [GO:0004602]; phospholipid-hydroperoxide glutathione peroxidase activity [GO:0047066]; thioredoxin-dependent peroxiredoxin activity [GO:0140824]; cellular response to oxidative stress [GO:0034599]	SUBCELLULAR LOCATION: Cytoplasm {ECO:0000269|PubMed:14562095}. Mitochondrion intermembrane space {ECO:0000269|PubMed:22984289}. Peroxisome matrix {ECO:0000269|PubMed:22659048}.			glutathione peroxidase activity [GO:0004602]; phospholipid-hydroperoxide glutathione peroxidase activity [GO:0047066]; thioredoxin-dependent peroxiredoxin activity [GO:0140824]	GO:0004602; GO:0005739; GO:0005758; GO:0005782; GO:0005829; GO:0034599; GO:0047066; GO:0140824	TRUE	0
P38041	P38041	reviewed	BOB1_YEAST	Protein BOB1 (BEM1-binding protein) (Growth inhibitory protein 7)	BOI1 BOB1 GIN7 YBL085W YBL0717	Saccharomyces cerevisiae (strain ATCC 204508 / S288c) (Baker's yeast)	980	actin filament organization [GO:0007015]; budding cell apical bud growth [GO:0007118]; endosome organization [GO:0007032]; receptor recycling [GO:0001881]; retrograde transport, endosome to Golgi [GO:0042147]; septum digestion after cytokinesis [GO:0000920]	cellular bud [GO:0005933]; cellular bud neck [GO:0005935]; cytoplasm [GO:0005737]; cytosol [GO:0005829]; early endosome [GO:0005769]; mating projection tip [GO:0043332]; plasma membrane [GO:0005886]; recycling endosome [GO:0055037]; site of polarized growth [GO:0030427]; trans-Golgi network [GO:0005802]	cellular bud [GO:0005933]; cellular bud neck [GO:0005935]; cytoplasm [GO:0005737]; cytosol [GO:0005829]; early endosome [GO:0005769]; mating projection tip [GO:0043332]; plasma membrane [GO:0005886]; recycling endosome [GO:0055037]; site of polarized growth [GO:0030427]; trans-Golgi network [GO:0005802]; phospholipid binding [GO:0005543]; actin filament organization [GO:0007015]; budding cell api…				phospholipid binding [GO:0005543]	GO:0000920; GO:0001881; GO:0005543; GO:0005737; GO:0005769; GO:0005802; GO:0005829; GO:0005886; GO:0005933; GO:0005935; GO:0007015; GO:0007032; GO:0007118; GO:0030427; GO:0042147; GO:0043332; GO:0055037	TRUE	0
P36533	P36533	reviewed	RM39_YEAST	Large ribosomal subunit protein bL33m (54S ribosomal protein L39, mitochondrial) (YmL39)	MRPL39 YML009C YM9571.09C	Saccharomyces cerevisiae (strain ATCC 204508 / S288c) (Baker's yeast)	70	mitochondrial translation [GO:0032543]	mitochondrial inner membrane [GO:0005743]; mitochondrial large ribosomal subunit [GO:0005762]; mitochondrion [GO:0005739]	mitochondrial inner membrane [GO:0005743]; mitochondrial large ribosomal subunit [GO:0005762]; mitochondrion [GO:0005739]; structural constituent of ribosome [GO:0003735]; mitochondrial translation [GO:0032543]	SUBCELLULAR LOCATION: Mitochondrion {ECO:0000269|PubMed:14562095, ECO:0000269|PubMed:16823961}. Note=Mitoribosomes are tethered to the mitochondrial inner membrane and spatially aligned with the membrane insertion machinery through two distinct membrane contact sites, formed by the 21S rRNA expansion segment 96-ES1 and the inner membrane protein MBA1. {ECO:0000269|PubMed:25609543}.			structural constituent of ribosome [GO:0003735]	GO:0003735; GO:0005739; GO:0005743; GO:0005762; GO:0032543	TRUE	0
P38873	P38873	reviewed	KOG1_YEAST	Target of rapamycin complex 1 subunit KOG1 (TORC1 subunit KOG1) (Kontroller of growth protein 1) (Local anesthetic-sensitive protein 24) (Regulatory-associated protein of TOR) (Raptor)	KOG1 LAS24 YHR186C H9998.14	Saccharomyces cerevisiae (strain ATCC 204508 / S288c) (Baker's yeast)	1557	cellular response to amino acid stimulus [GO:0071230]; cellular response to starvation [GO:0009267]; positive regulation of cell growth [GO:0030307]; regulation of autophagy [GO:0010506]; regulation of cell cycle [GO:0051726]; regulation of cell growth [GO:0001558]; response to nutrient [GO:0007584]; TOR signaling [GO:0031929]	cytoplasm [GO:0005737]; cytoplasmic stress granule [GO:0010494]; fungal-type vacuole membrane [GO:0000329]; mitochondrion [GO:0005739]; plasma membrane [GO:0005886]; TORC1 complex [GO:0031931]	cytoplasm [GO:0005737]; cytoplasmic stress granule [GO:0010494]; fungal-type vacuole membrane [GO:0000329]; mitochondrion [GO:0005739]; plasma membrane [GO:0005886]; TORC1 complex [GO:0031931]; protein-macromolecule adaptor activity [GO:0030674]; ubiquitin binding [GO:0043130]; cellular response to amino acid stimulus [GO:0071230]; cellular response to starvation [GO:0009267]; positive regulation…	SUBCELLULAR LOCATION: Cell membrane; Peripheral membrane protein; Cytoplasmic side. Vacuole membrane {ECO:0000269|PubMed:14562095, ECO:0000269|PubMed:16394584, ECO:0000269|PubMed:28483912}; Peripheral membrane protein {ECO:0000305}; Cytoplasmic side {ECO:0000305|PubMed:28483912}. Note=Also localizes to membranous structures within the cell interior, probably endosomal or Golgi membranes. {ECO:000…			protein-macromolecule adaptor activity [GO:0030674]; ubiquitin binding [GO:0043130]	GO:0000329; GO:0001558; GO:0005737; GO:0005739; GO:0005886; GO:0007584; GO:0009267; GO:0010494; GO:0010506; GO:0030307; GO:0030674; GO:0031929; GO:0031931; GO:0043130; GO:0051726; GO:0071230	TRUE	0
P38271	P38271	reviewed	OPY1_YEAST	Protein OPY1 (Overproduction-induced pheromone-resistant yeast protein 1)	OPY1 YBR129C YBR1004	Saccharomyces cerevisiae (strain ATCC 204508 / S288c) (Baker's yeast)	328	negative regulation of 1-phosphatidyl-1D-myo-inositol 4,5-bisphosphate biosynthetic process [GO:1902647]	cytoplasm [GO:0005737]; mitochondrion [GO:0005739]; plasma membrane [GO:0005886]	cytoplasm [GO:0005737]; mitochondrion [GO:0005739]; plasma membrane [GO:0005886]; phosphatidylinositol-4,5-bisphosphate binding [GO:0005546]; negative regulation of 1-phosphatidyl-1D-myo-inositol 4,5-bisphosphate biosynthetic process [GO:1902647]				phosphatidylinositol-4,5-bisphosphate binding [GO:0005546]	GO:0005546; GO:0005737; GO:0005739; GO:0005886; GO:1902647	TRUE	0
P35169	P35169	reviewed	TOR1_YEAST	Serine/threonine-protein kinase TOR1 (EC 2.7.11.1) (Dominant rapamycin resistance protein 1) (Phosphatidylinositol kinase homolog TOR1) (Target of rapamycin kinase 1)	TOR1 DRR1 YJR066W J1803	Saccharomyces cerevisiae (strain ATCC 204508 / S288c) (Baker's yeast)	2470	cellular response to heat [GO:0034605]; cellular response to oxidative stress [GO:0034599]; DNA damage response [GO:0006974]; fungal-type cell wall organization [GO:0031505]; meiotic cell cycle [GO:0051321]; mitochondria-nucleus signaling pathway [GO:0031930]; negative regulation of autophagy [GO:0010507]; negative regulation of macroautophagy [GO:0016242]; nucleolar large rRNA transcription by R…	cytoplasm [GO:0005737]; endosome membrane [GO:0010008]; fungal-type vacuole membrane [GO:0000329]; Golgi membrane [GO:0000139]; nucleus [GO:0005634]; plasma membrane [GO:0005886]; TORC1 complex [GO:0031931]; TORC2 complex [GO:0031932]	cytoplasm [GO:0005737]; endosome membrane [GO:0010008]; fungal-type vacuole membrane [GO:0000329]; Golgi membrane [GO:0000139]; nucleus [GO:0005634]; plasma membrane [GO:0005886]; TORC1 complex [GO:0031931]; TORC2 complex [GO:0031932]; ATP binding [GO:0005524]; protein kinase activity [GO:0004672]; protein serine kinase activity [GO:0106310]; protein serine/threonine kinase activity [GO:0004674];…	SUBCELLULAR LOCATION: Cell membrane {ECO:0000269|PubMed:10973982, ECO:0000269|PubMed:12631735}; Peripheral membrane protein {ECO:0000269|PubMed:10973982, ECO:0000269|PubMed:12631735}; Cytoplasmic side {ECO:0000269|PubMed:10973982, ECO:0000269|PubMed:12631735}. Vacuole membrane {ECO:0000269|PubMed:12631735, ECO:0000269|PubMed:28483912, ECO:0000269|PubMed:28993463, ECO:0000269|PubMed:29698392, ECO:…			ATP binding [GO:0005524]; protein kinase activity [GO:0004672]; protein serine kinase activity [GO:0106310]; protein serine/threonine kinase activity [GO:0004674]; protein-containing complex binding [GO:0044877]	GO:0000139; GO:0000329; GO:0001558; GO:0004672; GO:0004674; GO:0005524; GO:0005634; GO:0005737; GO:0005886; GO:0006413; GO:0006468; GO:0006974; GO:0007584; GO:0010008; GO:0010507; GO:0016242; GO:0018105; GO:0031505; GO:0031929; GO:0031930; GO:0031931; GO:0031932; GO:0034599; GO:0034605; GO:0034976; GO:0042254; GO:0042790; GO:0044877; GO:0051321; GO:0051726; GO:0090153; GO:0106310; GO:1905356	TRUE	0
P53178	P53178	reviewed	ALG13_YEAST	UDP-N-acetylglucosamine transferase subunit ALG13 (EC 2.4.1.141) (Asparagine-linked glycosylation protein 13)	ALG13 YGL047W	Saccharomyces cerevisiae (strain ATCC 204508 / S288c) (Baker's yeast)	202	dolichol-linked oligosaccharide biosynthetic process [GO:0006488]	cytoplasm [GO:0005737]; cytoplasmic side of Golgi membrane [GO:0098548]; cytosol [GO:0005829]; endoplasmic reticulum [GO:0005783]; nucleus [GO:0005634]; UDP-N-acetylglucosamine transferase complex [GO:0043541]	cytoplasm [GO:0005737]; cytoplasmic side of Golgi membrane [GO:0098548]; cytosol [GO:0005829]; endoplasmic reticulum [GO:0005783]; nucleus [GO:0005634]; UDP-N-acetylglucosamine transferase complex [GO:0043541]; identical protein binding [GO:0042802]; N-acetylglucosaminyldiphosphodolichol N-acetylglucosaminyltransferase activity [GO:0004577]; dolichol-linked oligosaccharide biosynthetic process [G…	SUBCELLULAR LOCATION: Endoplasmic reticulum {ECO:0000269|PubMed:14562095, ECO:0000269|PubMed:16100110}.			identical protein binding [GO:0042802]; N-acetylglucosaminyldiphosphodolichol N-acetylglucosaminyltransferase activity [GO:0004577]	GO:0004577; GO:0005634; GO:0005737; GO:0005783; GO:0005829; GO:0006488; GO:0042802; GO:0043541; GO:0098548	TRUE	0
Q06410	Q06410	reviewed	ATG17_YEAST	Autophagy-related protein 17	ATG17 APG17 YLR423C	Saccharomyces cerevisiae (strain ATCC 204508 / S288c) (Baker's yeast)	417	autophagosome assembly [GO:0000045]; autophagy [GO:0006914]; autophagy of mitochondrion [GO:0000422]; autophagy of peroxisome [GO:0030242]; late nucleophagy [GO:0044805]; piecemeal microautophagy of the nucleus [GO:0034727]; positive regulation of autophagosome assembly [GO:2000786]; positive regulation of autophagosome size [GO:0045772]; protein localization to phagophore assembly site [GO:00344…	Atg1/ULK1 kinase complex [GO:1990316]; cytoplasm [GO:0005737]; nucleus [GO:0005634]; phagophore assembly site [GO:0000407]; phagophore assembly site membrane [GO:0034045]; protein-containing complex [GO:0032991]; vacuole-isolation membrane contact site [GO:0120095]	Atg1/ULK1 kinase complex [GO:1990316]; cytoplasm [GO:0005737]; nucleus [GO:0005634]; phagophore assembly site [GO:0000407]; phagophore assembly site membrane [GO:0034045]; protein-containing complex [GO:0032991]; vacuole-isolation membrane contact site [GO:0120095]; molecular adaptor activity [GO:0060090]; protein kinase activator activity [GO:0030295]; SNARE binding [GO:0000149]; autophagosome a…	SUBCELLULAR LOCATION: Cytoplasm. Preautophagosomal structure membrane; Peripheral membrane protein.			molecular adaptor activity [GO:0060090]; protein kinase activator activity [GO:0030295]; SNARE binding [GO:0000149]	GO:0000045; GO:0000149; GO:0000407; GO:0000422; GO:0005634; GO:0005737; GO:0006914; GO:0030242; GO:0030295; GO:0032991; GO:0034045; GO:0034497; GO:0034727; GO:0042594; GO:0044805; GO:0045772; GO:0060090; GO:0120095; GO:1990316; GO:2000786	TRUE	0
P38137	P38137	reviewed	FAT2_YEAST	Oxalate--CoA ligase (EC 6.2.1.8) (Acyl-activating enzyme 3) (Oxalyl-CoA synthetase) (Peroxisomal-coenzyme A synthetase)	PCS60 AAE3 FAT2 YBR222C YBR1512	Saccharomyces cerevisiae (strain ATCC 204508 / S288c) (Baker's yeast)	543	fatty acid metabolic process [GO:0006631]; oxalate catabolic process [GO:0033611]	cytoplasm [GO:0005737]; peroxisomal matrix [GO:0005782]; peroxisomal membrane [GO:0005778]	cytoplasm [GO:0005737]; peroxisomal matrix [GO:0005782]; peroxisomal membrane [GO:0005778]; ATP binding [GO:0005524]; medium-chain fatty acid-CoA ligase activity [GO:0031956]; mRNA binding [GO:0003729]; oxalate-CoA ligase activity [GO:0050203]; fatty acid metabolic process [GO:0006631]; oxalate catabolic process [GO:0033611]	SUBCELLULAR LOCATION: Peroxisome matrix {ECO:0000269|PubMed:8841414}. Peroxisome membrane {ECO:0000269|PubMed:8841414}; Peripheral membrane protein {ECO:0000269|PubMed:8841414}. Note=Imported in peroxisome via recognition by the peroxisomal targeting signal receptor PEX5. {ECO:0000269|PubMed:26359497}.			ATP binding [GO:0005524]; medium-chain fatty acid-CoA ligase activity [GO:0031956]; mRNA binding [GO:0003729]; oxalate-CoA ligase activity [GO:0050203]	GO:0003729; GO:0005524; GO:0005737; GO:0005778; GO:0005782; GO:0006631; GO:0031956; GO:0033611; GO:0050203	TRUE	0
Q00245	Q00245	reviewed	RHO3_YEAST	GTP-binding protein RHO3	RHO3 YIL118W	Saccharomyces cerevisiae (strain ATCC 204508 / S288c) (Baker's yeast)	231	actin filament organization [GO:0007015]; establishment or maintenance of actin cytoskeleton polarity [GO:0030950]; positive regulation of exocytosis [GO:0045921]; positive regulation of formin-nucleated actin cable assembly [GO:0090338]; signal transduction [GO:0007165]; small GTPase mediated signal transduction [GO:0007264]	cellular bud [GO:0005933]; cytosol [GO:0005829]; plasma membrane [GO:0005886]	cellular bud [GO:0005933]; cytosol [GO:0005829]; plasma membrane [GO:0005886]; GTP binding [GO:0005525]; GTPase activity [GO:0003924]; protein kinase binding [GO:0019901]; actin filament organization [GO:0007015]; establishment or maintenance of actin cytoskeleton polarity [GO:0030950]; positive regulation of exocytosis [GO:0045921]; positive regulation of formin-nucleated actin cable assembly [G…	SUBCELLULAR LOCATION: Cell membrane {ECO:0000305}; Lipid-anchor {ECO:0000305}; Cytoplasmic side {ECO:0000305}.			GTP binding [GO:0005525]; GTPase activity [GO:0003924]; protein kinase binding [GO:0019901]	GO:0003924; GO:0005525; GO:0005829; GO:0005886; GO:0005933; GO:0007015; GO:0007165; GO:0007264; GO:0019901; GO:0030950; GO:0045921; GO:0090338	TRUE	0
P38068	P38068	reviewed	GLRX7_YEAST	Monothiol glutaredoxin-7	GRX7 GRX6 YBR014C YBR0219	Saccharomyces cerevisiae (strain ATCC 204508 / S288c) (Baker's yeast)	203	cellular response to oxidative stress [GO:0034599]; intracellular iron ion homeostasis [GO:0006879]; iron-sulfur cluster assembly [GO:0016226]	cis-Golgi network [GO:0005801]; cytoplasm [GO:0005737]; fungal-type vacuole [GO:0000324]; Golgi apparatus [GO:0005794]; Golgi lumen [GO:0005796]; iron-sulfur cluster assembly complex [GO:1990229]; membrane [GO:0016020]; nucleus [GO:0005634]	cis-Golgi network [GO:0005801]; cytoplasm [GO:0005737]; fungal-type vacuole [GO:0000324]; Golgi apparatus [GO:0005794]; Golgi lumen [GO:0005796]; iron-sulfur cluster assembly complex [GO:1990229]; membrane [GO:0016020]; nucleus [GO:0005634]; 2 iron, 2 sulfur cluster binding [GO:0051537]; glutathione disulfide oxidoreductase activity [GO:0015038]; glutathione-disulfide reductase (NADP) activity [G…				2 iron, 2 sulfur cluster binding [GO:0051537]; glutathione disulfide oxidoreductase activity [GO:0015038]; glutathione-disulfide reductase (NADP) activity [GO:0004362]; metal ion binding [GO:0046872]	GO:0000324; GO:0004362; GO:0005634; GO:0005737; GO:0005794; GO:0005796; GO:0005801; GO:0006879; GO:0015038; GO:0016020; GO:0016226; GO:0034599; GO:0046872; GO:0051537; GO:1990229	TRUE	0
Q12451	Q12451	reviewed	OSH2_YEAST	Oxysterol-binding protein homolog 2 (Oxysterol-binding protein-related protein 2) (ORP 2) (OSBP-related protein 2)	OSH2 YDL019C D2845	Saccharomyces cerevisiae (strain ATCC 204508 / S288c) (Baker's yeast)	1283	endocytosis [GO:0006897]; ER to Golgi ceramide transport [GO:0035621]; exocytosis [GO:0006887]; maintenance of cell polarity [GO:0030011]; piecemeal microautophagy of the nucleus [GO:0034727]; sterol transport [GO:0015918]	cell periphery [GO:0071944]; cellular bud neck [GO:0005935]; cortical endoplasmic reticulum [GO:0032541]; cytosol [GO:0005829]; endoplasmic reticulum [GO:0005783]; endoplasmic reticulum membrane [GO:0005789]; intracellular membrane-bounded organelle [GO:0043231]; nuclear envelope [GO:0005635]; perinuclear endoplasmic reticulum [GO:0097038]; plasma membrane [GO:0005886]	cell periphery [GO:0071944]; cellular bud neck [GO:0005935]; cortical endoplasmic reticulum [GO:0032541]; cytosol [GO:0005829]; endoplasmic reticulum [GO:0005783]; endoplasmic reticulum membrane [GO:0005789]; intracellular membrane-bounded organelle [GO:0043231]; nuclear envelope [GO:0005635]; perinuclear endoplasmic reticulum [GO:0097038]; plasma membrane [GO:0005886]; lipid binding [GO:0008289]…	SUBCELLULAR LOCATION: Cell membrane {ECO:0000269|PubMed:11408574, ECO:0000269|PubMed:12727870, ECO:0000269|PubMed:20008566}; Peripheral membrane protein {ECO:0000269|PubMed:11408574, ECO:0000269|PubMed:12727870}. Endoplasmic reticulum membrane {ECO:0000269|PubMed:20008566}. Note=Cell periphery, enriched in small buds of G1 phase cells and near the bud-neck region of S phase cells. Enriched on reg…			lipid binding [GO:0008289]; sterol binding [GO:0032934]; sterol transfer activity [GO:0120015]; sterol transporter activity [GO:0015248]	GO:0005635; GO:0005783; GO:0005789; GO:0005829; GO:0005886; GO:0005935; GO:0006887; GO:0006897; GO:0008289; GO:0015248; GO:0015918; GO:0030011; GO:0032541; GO:0032934; GO:0034727; GO:0035621; GO:0043231; GO:0071944; GO:0097038; GO:0120015	TRUE	0
P11792	P11792	reviewed	SCH9_YEAST	Serine/threonine-protein kinase SCH9 (EC 2.7.11.1)	SCH9 KOM1 YHR205W	Saccharomyces cerevisiae (strain ATCC 204508 / S288c) (Baker's yeast)	824	intracellular signal transduction [GO:0035556]; phosphorylation [GO:0016310]; positive regulation of hydrogen sulfide biosynthetic process [GO:1904828]; positive regulation of ribosomal protein gene transcription by RNA polymerase II [GO:0060963]; positive regulation of transcription by RNA polymerase I [GO:0045943]; positive regulation of transcription by RNA polymerase III [GO:0045945]; regulat…	cytoplasm [GO:0005737]; fungal-type vacuole membrane [GO:0000329]; nucleus [GO:0005634]	cytoplasm [GO:0005737]; fungal-type vacuole membrane [GO:0000329]; nucleus [GO:0005634]; ATP binding [GO:0005524]; protein serine kinase activity [GO:0106310]; protein serine/threonine kinase activity [GO:0004674]; intracellular signal transduction [GO:0035556]; phosphorylation [GO:0016310]; positive regulation of hydrogen sulfide biosynthetic process [GO:1904828]; positive regulation of ribosoma…				ATP binding [GO:0005524]; protein serine kinase activity [GO:0106310]; protein serine/threonine kinase activity [GO:0004674]	GO:0000329; GO:0004674; GO:0005524; GO:0005634; GO:0005737; GO:0006357; GO:0008361; GO:0016310; GO:0032880; GO:0035556; GO:0045943; GO:0045945; GO:0047484; GO:0060963; GO:0090153; GO:0106310; GO:1901494; GO:1904828	TRUE	0
P39105	P39105	reviewed	PLB1_YEAST	Lysophospholipase 1 (EC 3.1.1.5) (Phospholipase B 1)	PLB1 YMR008C YM8270.10C	Saccharomyces cerevisiae (strain ATCC 204508 / S288c) (Baker's yeast)	664	glycerophospholipid catabolic process [GO:0046475]; glycerophospholipid metabolic process [GO:0006650]; phosphatidylcholine acyl-chain remodeling [GO:0036151]	cell periphery [GO:0071944]; cytosol [GO:0005829]; endoplasmic reticulum [GO:0005783]; extracellular region [GO:0005576]; intracellular membrane-bounded organelle [GO:0043231]; periplasmic space [GO:0042597]; plasma membrane [GO:0005886]; side of membrane [GO:0098552]	cell periphery [GO:0071944]; cytosol [GO:0005829]; endoplasmic reticulum [GO:0005783]; extracellular region [GO:0005576]; intracellular membrane-bounded organelle [GO:0043231]; periplasmic space [GO:0042597]; plasma membrane [GO:0005886]; side of membrane [GO:0098552]; lysophospholipase activity [GO:0004622]; phosphatidyl phospholipase B activity [GO:0102545]; phospholipase A2 activity [GO:000462…	SUBCELLULAR LOCATION: Cell membrane {ECO:0000305|PubMed:10383953, ECO:0000305|PubMed:10497163}; Lipid-anchor, GPI-anchor {ECO:0000305|PubMed:10383953, ECO:0000305|PubMed:10497163}.			lysophospholipase activity [GO:0004622]; phosphatidyl phospholipase B activity [GO:0102545]; phospholipase A2 activity [GO:0004623]	GO:0004622; GO:0004623; GO:0005576; GO:0005783; GO:0005829; GO:0005886; GO:0006650; GO:0036151; GO:0042597; GO:0043231; GO:0046475; GO:0071944; GO:0098552; GO:0102545	TRUE	0
Q12438	Q12438	reviewed	GLRX6_YEAST	Monothiol glutaredoxin-6	GRX6 YDL010W D2890	Saccharomyces cerevisiae (strain ATCC 204508 / S288c) (Baker's yeast)	231	cellular response to oxidative stress [GO:0034599]; intracellular iron ion homeostasis [GO:0006879]; iron-sulfur cluster assembly [GO:0016226]	cis-Golgi network [GO:0005801]; cytoplasm [GO:0005737]; endoplasmic reticulum membrane [GO:0005789]; fungal-type vacuole [GO:0000324]; Golgi apparatus [GO:0005794]; Golgi lumen [GO:0005796]; iron-sulfur cluster assembly complex [GO:1990229]; membrane [GO:0016020]	cis-Golgi network [GO:0005801]; cytoplasm [GO:0005737]; endoplasmic reticulum membrane [GO:0005789]; fungal-type vacuole [GO:0000324]; Golgi apparatus [GO:0005794]; Golgi lumen [GO:0005796]; iron-sulfur cluster assembly complex [GO:1990229]; membrane [GO:0016020]; 2 iron, 2 sulfur cluster binding [GO:0051537]; glutathione disulfide oxidoreductase activity [GO:0015038]; glutathione-disulfide reduc…	SUBCELLULAR LOCATION: Vacuole {ECO:0000269|PubMed:14562095}.			2 iron, 2 sulfur cluster binding [GO:0051537]; glutathione disulfide oxidoreductase activity [GO:0015038]; glutathione-disulfide reductase (NADP) activity [GO:0004362]; iron ion binding [GO:0005506]	GO:0000324; GO:0004362; GO:0005506; GO:0005737; GO:0005789; GO:0005794; GO:0005796; GO:0005801; GO:0006879; GO:0015038; GO:0016020; GO:0016226; GO:0034599; GO:0051537; GO:1990229	TRUE	0
P40353	P40353	reviewed	ATF1_YEAST	Alcohol O-acetyltransferase 1 (AATase 1) (EC 2.3.1.84) (EC 3.1.2.20)	ATF1 YOR377W	Saccharomyces cerevisiae (strain ATCC 204508 / S288c) (Baker's yeast)	525	acetate ester metabolic process involved in fermentation [GO:1901089]	endoplasmic reticulum [GO:0005783]; endoplasmic reticulum membrane [GO:0005789]; lipid droplet [GO:0005811]	endoplasmic reticulum [GO:0005783]; endoplasmic reticulum membrane [GO:0005789]; lipid droplet [GO:0005811]; acyl-CoA hydrolase activity [GO:0047617]; alcohol O-acetyltransferase activity [GO:0004026]; N-acetyltransferase activity [GO:0008080]; acetate ester metabolic process involved in fermentation [GO:1901089]	SUBCELLULAR LOCATION: Lipid droplet {ECO:0000269|PubMed:15042596, ECO:0000269|PubMed:25093817, ECO:0000269|PubMed:28497697}. Endoplasmic reticulum membrane {ECO:0000269|PubMed:25093817}; Peripheral membrane protein {ECO:0000269|PubMed:25093817}. Note=Traffics to lipid droplets during the stationary phase (PubMed:25093817). {ECO:0000269|PubMed:25093817}.			acyl-CoA hydrolase activity [GO:0047617]; alcohol O-acetyltransferase activity [GO:0004026]; N-acetyltransferase activity [GO:0008080]	GO:0004026; GO:0005783; GO:0005789; GO:0005811; GO:0008080; GO:0047617; GO:1901089	TRUE	0
P18409	P18409	reviewed	MDM10_YEAST	Mitochondrial distribution and morphology protein 10 (Mitochondrial inheritance component MDM10)	MDM10 YAL010C FUN37	Saccharomyces cerevisiae (strain ATCC 204508 / S288c) (Baker's yeast)	493	establishment of mitochondrion localization [GO:0051654]; mitochondrial genome maintenance [GO:0000002]; mitochondrial outer membrane translocase complex assembly [GO:0070096]; mitochondrion organization [GO:0007005]; mitochondrion-endoplasmic reticulum membrane tethering [GO:1990456]; phospholipid homeostasis [GO:0055091]; phospholipid transport [GO:0015914]; protein insertion into mitochondrial…	ERMES complex [GO:0032865]; mitochondrial outer membrane [GO:0005741]; outer mitochondrial membrane protein complex [GO:0098799]; SAM complex [GO:0001401]	ERMES complex [GO:0032865]; mitochondrial outer membrane [GO:0005741]; outer mitochondrial membrane protein complex [GO:0098799]; SAM complex [GO:0001401]; establishment of mitochondrion localization [GO:0051654]; mitochondrial genome maintenance [GO:0000002]; mitochondrial outer membrane translocase complex assembly [GO:0070096]; mitochondrion organization [GO:0007005]; mitochondrion-endoplasmic…	SUBCELLULAR LOCATION: Mitochondrion outer membrane {ECO:0000255|HAMAP-Rule:MF_03102, ECO:0000269|PubMed:13679517, ECO:0000269|PubMed:14562095, ECO:0000269|PubMed:16407407, ECO:0000269|PubMed:19556461, ECO:0000269|PubMed:8089171}; Multi-pass membrane protein {ECO:0000255|HAMAP-Rule:MF_03102, ECO:0000269|PubMed:13679517, ECO:0000269|PubMed:14562095, ECO:0000269|PubMed:16407407, ECO:0000269|PubMed:1…				GO:0000002; GO:0001401; GO:0005741; GO:0007005; GO:0015914; GO:0032865; GO:0045040; GO:0051654; GO:0055091; GO:0070096; GO:0098799; GO:1990456	TRUE	0
P36161	P36161	reviewed	NU133_YEAST	Nucleoporin NUP133 (Nuclear pore protein NUP133)	NUP133 RAT3 YKR082W YKR402	Saccharomyces cerevisiae (strain ATCC 204508 / S288c) (Baker's yeast)	1157	double-strand break repair [GO:0006302]; mRNA export from nucleus in response to heat stress [GO:0031990]; negative regulation of transcription by RNA polymerase II [GO:0000122]; nuclear pore localization [GO:0051664]; nucleocytoplasmic transport [GO:0006913]; poly(A)+ mRNA export from nucleus [GO:0016973]; positive regulation of DNA-templated transcription [GO:0045893]; positive regulation of tr…	chromosome, telomeric region [GO:0000781]; cytosol [GO:0005829]; nuclear envelope [GO:0005635]; nuclear membrane [GO:0031965]; nuclear pore [GO:0005643]; nuclear pore outer ring [GO:0031080]; nucleus [GO:0005634]	chromosome, telomeric region [GO:0000781]; cytosol [GO:0005829]; nuclear envelope [GO:0005635]; nuclear membrane [GO:0031965]; nuclear pore [GO:0005643]; nuclear pore outer ring [GO:0031080]; nucleus [GO:0005634]; structural constituent of nuclear pore [GO:0017056]; double-strand break repair [GO:0006302]; mRNA export from nucleus in response to heat stress [GO:0031990]; negative regulation of tr…	SUBCELLULAR LOCATION: Nucleus, nuclear pore complex {ECO:0000269|PubMed:10684247}. Nucleus membrane; Peripheral membrane protein; Cytoplasmic side. Nucleus membrane; Peripheral membrane protein; Nucleoplasmic side. Note=Symmetric distribution.			structural constituent of nuclear pore [GO:0017056]	GO:0000122; GO:0000781; GO:0000972; GO:0000973; GO:0005634; GO:0005635; GO:0005643; GO:0005829; GO:0006302; GO:0006409; GO:0006606; GO:0006913; GO:0016973; GO:0017056; GO:0030466; GO:0031080; GO:0031509; GO:0031965; GO:0031990; GO:0034398; GO:0045893; GO:0045944; GO:0051664	TRUE	0
P32610	P32610	reviewed	VATD_YEAST	V-type proton ATPase subunit D (V-ATPase subunit D) (Vacuolar proton pump subunit D)	VMA8 YEL051W SYGP-ORF11	Saccharomyces cerevisiae (strain ATCC 204508 / S288c) (Baker's yeast)	256	endosomal lumen acidification [GO:0048388]; Golgi lumen acidification [GO:0061795]; proton transmembrane transport [GO:1902600]; vacuolar acidification [GO:0007035]	fungal-type vacuole membrane [GO:0000329]; Golgi membrane [GO:0000139]; proton-transporting V-type ATPase complex [GO:0033176]; vacuolar proton-transporting V-type ATPase complex [GO:0016471]; vacuolar proton-transporting V-type ATPase, V1 domain [GO:0000221]	fungal-type vacuole membrane [GO:0000329]; Golgi membrane [GO:0000139]; proton-transporting V-type ATPase complex [GO:0033176]; vacuolar proton-transporting V-type ATPase complex [GO:0016471]; vacuolar proton-transporting V-type ATPase, V1 domain [GO:0000221]; proton-transporting ATPase activity, rotational mechanism [GO:0046961]; endosomal lumen acidification [GO:0048388]; Golgi lumen acidificat…	SUBCELLULAR LOCATION: Vacuole membrane {ECO:0000269|PubMed:7797485}; Peripheral membrane protein {ECO:0000305}; Cytoplasmic side {ECO:0000305}.			proton-transporting ATPase activity, rotational mechanism [GO:0046961]	GO:0000139; GO:0000221; GO:0000329; GO:0007035; GO:0016471; GO:0033176; GO:0046961; GO:0048388; GO:0061795; GO:1902600	TRUE	0
O13547	O13547	reviewed	CCW14_YEAST	Covalently-linked cell wall protein 14 (Inner cell wall protein)	CCW14 ICWP SSR1 YLR390W-A YLR391W-A	Saccharomyces cerevisiae (strain ATCC 204508 / S288c) (Baker's yeast)	238	fungal-type cell wall organization [GO:0031505]	cell periphery [GO:0071944]; extracellular region [GO:0005576]; fungal-type cell wall [GO:0009277]; mitochondrion [GO:0005739]; side of membrane [GO:0098552]	cell periphery [GO:0071944]; extracellular region [GO:0005576]; fungal-type cell wall [GO:0009277]; mitochondrion [GO:0005739]; side of membrane [GO:0098552]; structural constituent of cell wall [GO:0005199]; fungal-type cell wall organization [GO:0031505]	SUBCELLULAR LOCATION: Secreted, cell wall. Membrane; Lipid-anchor, GPI-anchor. Note=Covalently-linked GPI-modified cell wall protein (GPI-CWP).			structural constituent of cell wall [GO:0005199]	GO:0005199; GO:0005576; GO:0005739; GO:0009277; GO:0031505; GO:0071944; GO:0098552	TRUE	0
P33332	P33332	reviewed	SEC3_YEAST	Exocyst complex component SEC3 (Protein PSL1)	SEC3 PSL1 YER008C	Saccharomyces cerevisiae (strain ATCC 204508 / S288c) (Baker's yeast)	1336	endoplasmic reticulum inheritance [GO:0048309]; exocyst assembly [GO:0001927]; exocyst localization [GO:0051601]; exocytosis [GO:0006887]; Golgi to plasma membrane transport [GO:0006893]; protein transport [GO:0015031]; vesicle docking involved in exocytosis [GO:0006904]	cellular bud neck [GO:0005935]; cellular bud tip [GO:0005934]; cytoplasm [GO:0005737]; exocyst [GO:0000145]; incipient cellular bud site [GO:0000131]; mating projection tip [GO:0043332]; plasma membrane [GO:0005886]; prospore membrane [GO:0005628]	cellular bud neck [GO:0005935]; cellular bud tip [GO:0005934]; cytoplasm [GO:0005737]; exocyst [GO:0000145]; incipient cellular bud site [GO:0000131]; mating projection tip [GO:0043332]; plasma membrane [GO:0005886]; prospore membrane [GO:0005628]; phosphatidylinositol-4,5-bisphosphate binding [GO:0005546]; small GTPase binding [GO:0031267]; endoplasmic reticulum inheritance [GO:0048309]; exocyst…				phosphatidylinositol-4,5-bisphosphate binding [GO:0005546]; small GTPase binding [GO:0031267]	GO:0000131; GO:0000145; GO:0001927; GO:0005546; GO:0005628; GO:0005737; GO:0005886; GO:0005934; GO:0005935; GO:0006887; GO:0006893; GO:0006904; GO:0015031; GO:0031267; GO:0043332; GO:0048309; GO:0051601	TRUE	0
Q06673	Q06673	reviewed	ECM30_YEAST	Protein ECM30 (Extracellular mutant protein 30)	ECM30 YLR436C	Saccharomyces cerevisiae (strain ATCC 204508 / S288c) (Baker's yeast)	1274	cell wall organization [GO:0071555]	cytoplasm [GO:0005737]; Golgi medial cisterna [GO:0005797]; Golgi trans cisterna [GO:0000138]; membrane [GO:0016020]	cytoplasm [GO:0005737]; Golgi medial cisterna [GO:0005797]; Golgi trans cisterna [GO:0000138]; membrane [GO:0016020]; cell wall organization [GO:0071555]	SUBCELLULAR LOCATION: Cytoplasm {ECO:0000269|PubMed:14562095}.				GO:0000138; GO:0005737; GO:0005797; GO:0016020; GO:0071555	TRUE	0
P32902	P32902	reviewed	RT04_YEAST	Small ribosomal subunit protein uS2m (37S ribosomal protein MRP4, mitochondrial)	MRP4 MRP4A YHL004W	Saccharomyces cerevisiae (strain ATCC 204508 / S288c) (Baker's yeast)	394	mitochondrial translation [GO:0032543]	mitochondrial inner membrane [GO:0005743]; mitochondrial small ribosomal subunit [GO:0005763]; mitochondrion [GO:0005739]	mitochondrial inner membrane [GO:0005743]; mitochondrial small ribosomal subunit [GO:0005763]; mitochondrion [GO:0005739]; structural constituent of ribosome [GO:0003735]; mitochondrial translation [GO:0032543]	SUBCELLULAR LOCATION: Mitochondrion {ECO:0000269|PubMed:14562095, ECO:0000269|PubMed:14576278}. Note=Mitoribosomes are tethered to the mitochondrial inner membrane and spatially aligned with the membrane insertion machinery through two distinct membrane contact sites, formed by the 21S rRNA expansion segment 96-ES1 and the inner membrane protein MBA1. {ECO:0000269|PubMed:25609543}.			structural constituent of ribosome [GO:0003735]	GO:0003735; GO:0005739; GO:0005743; GO:0005763; GO:0032543	TRUE	0
P46784	P46784	reviewed	RS10B_YEAST	Small ribosomal subunit protein eS10B (40S ribosomal protein S10-B)	RPS10B YMR230W YM9959.12	Saccharomyces cerevisiae (strain ATCC 204508 / S288c) (Baker's yeast)	105	cellular response to amino acid starvation [GO:0034198]; cytoplasmic translation [GO:0002181]; positive regulation of protein kinase activity [GO:0045860]; positive regulation of protein phosphorylation [GO:0001934]; rRNA export from nucleus [GO:0006407]	cytosol [GO:0005829]; cytosolic small ribosomal subunit [GO:0022627]	cytosol [GO:0005829]; cytosolic small ribosomal subunit [GO:0022627]; RNA binding [GO:0003723]; structural constituent of ribosome [GO:0003735]; cellular response to amino acid starvation [GO:0034198]; cytoplasmic translation [GO:0002181]; positive regulation of protein kinase activity [GO:0045860]; positive regulation of protein phosphorylation [GO:0001934]; rRNA export from nucleus [GO:0006407]	SUBCELLULAR LOCATION: Cytoplasm {ECO:0000269|PubMed:14562095, ECO:0000269|PubMed:22096102}.			RNA binding [GO:0003723]; structural constituent of ribosome [GO:0003735]	GO:0001934; GO:0002181; GO:0003723; GO:0003735; GO:0005829; GO:0006407; GO:0022627; GO:0034198; GO:0045860	FALSE	0
Q12690	Q12690	reviewed	RL13A_YEAST	Large ribosomal subunit protein eL13A (60S ribosomal protein L13-A)	RPL13A YDL082W	Saccharomyces cerevisiae (strain ATCC 204508 / S288c) (Baker's yeast)	199	cytoplasmic translation [GO:0002181]	cytosol [GO:0005829]; cytosolic large ribosomal subunit [GO:0022625]	cytosol [GO:0005829]; cytosolic large ribosomal subunit [GO:0022625]; RNA binding [GO:0003723]; structural constituent of ribosome [GO:0003735]; cytoplasmic translation [GO:0002181]	SUBCELLULAR LOCATION: Cytoplasm {ECO:0000269|PubMed:14562095, ECO:0000269|PubMed:22096102}.			RNA binding [GO:0003723]; structural constituent of ribosome [GO:0003735]	GO:0002181; GO:0003723; GO:0003735; GO:0005829; GO:0022625	FALSE	0
Q06142	Q06142	reviewed	IMB1_YEAST	Importin subunit beta-1 (Importin-95) (Karyopherin subunit beta-1) (Karyopherin-95)	KAP95 YLR347C L8300.15	Saccharomyces cerevisiae (strain ATCC 204508 / S288c) (Baker's yeast)	861	import into nucleus [GO:0051170]; mRNA transport [GO:0051028]; NLS-bearing protein import into nucleus [GO:0006607]; nuclear pore complex assembly [GO:0051292]; phosphatidylcholine biosynthetic process [GO:0006656]; protein import into nucleus [GO:0006606]; protein targeting to membrane [GO:0006612]; regulation of nucleocytoplasmic transport [GO:0046822]; regulation of protein desumoylation [GO:0…	cytoplasm [GO:0005737]; cytosol [GO:0005829]; NLS-dependent protein nuclear import complex [GO:0042564]; nuclear envelope [GO:0005635]; nuclear pore [GO:0005643]; nucleus [GO:0005634]	cytoplasm [GO:0005737]; cytosol [GO:0005829]; NLS-dependent protein nuclear import complex [GO:0042564]; nuclear envelope [GO:0005635]; nuclear pore [GO:0005643]; nucleus [GO:0005634]; disordered domain specific binding [GO:0097718]; guanyl-nucleotide exchange factor activity [GO:0005085]; importin-alpha family protein binding [GO:0061676]; nuclear import signal receptor activity [GO:0061608]; nu…	SUBCELLULAR LOCATION: Cytoplasm {ECO:0000269|PubMed:10684247, ECO:0000269|PubMed:9321403}. Nucleus {ECO:0000269|PubMed:9321403}. Nucleus, nuclear pore complex {ECO:0000269|PubMed:10684247}.			disordered domain specific binding [GO:0097718]; guanyl-nucleotide exchange factor activity [GO:0005085]; importin-alpha family protein binding [GO:0061676]; nuclear import signal receptor activity [GO:0061608]; nuclear localization sequence binding [GO:0008139]; protein-containing complex binding [GO:0044877]; small GTPase binding [GO:0031267]	GO:0005085; GO:0005634; GO:0005635; GO:0005643; GO:0005737; GO:0005829; GO:0006606; GO:0006607; GO:0006612; GO:0006656; GO:0008139; GO:0031267; GO:0042564; GO:0044877; GO:0046822; GO:0051028; GO:0051170; GO:0051292; GO:0060188; GO:0061608; GO:0061676; GO:0097718	FALSE	0
Q12220	Q12220	reviewed	UTP12_YEAST	U3 small nucleolar RNA-associated protein 12 (U3 snoRNA-associated protein 12) (DOM34-interacting protein 2) (U three protein 12)	DIP2 UTP12 YLR129W L3116 L9233.1	Saccharomyces cerevisiae (strain ATCC 204508 / S288c) (Baker's yeast)	943	endonucleolytic cleavage in 5'-ETS of tricistronic rRNA transcript (SSU-rRNA, 5.8S rRNA, LSU-rRNA) [GO:0000480]; endonucleolytic cleavage in ITS1 to separate SSU-rRNA from 5.8S rRNA and LSU-rRNA from tricistronic rRNA transcript (SSU-rRNA, 5.8S rRNA, LSU-rRNA) [GO:0000447]; endonucleolytic cleavage to generate mature 5'-end of SSU-rRNA from (SSU-rRNA, 5.8S rRNA, LSU-rRNA) [GO:0000472]; maturation…	90S preribosome [GO:0030686]; nucleolus [GO:0005730]; nucleoplasm [GO:0005654]; Pwp2p-containing subcomplex of 90S preribosome [GO:0034388]; small-subunit processome [GO:0032040]	90S preribosome [GO:0030686]; nucleolus [GO:0005730]; nucleoplasm [GO:0005654]; Pwp2p-containing subcomplex of 90S preribosome [GO:0034388]; small-subunit processome [GO:0032040]; snoRNA binding [GO:0030515]; U3 snoRNA binding [GO:0034511]; endonucleolytic cleavage in 5'-ETS of tricistronic rRNA transcript (SSU-rRNA, 5.8S rRNA, LSU-rRNA) [GO:0000480]; endonucleolytic cleavage in ITS1 to separate …	SUBCELLULAR LOCATION: Nucleus, nucleolus {ECO:0000269|PubMed:12068309}.			snoRNA binding [GO:0030515]; U3 snoRNA binding [GO:0034511]	GO:0000447; GO:0000462; GO:0000472; GO:0000480; GO:0005654; GO:0005730; GO:0030490; GO:0030515; GO:0030686; GO:0032040; GO:0034388; GO:0034511	FALSE	0
P32454	P32454	reviewed	APE2_YEAST	Aminopeptidase 2, mitochondrial (AP-II) (Aminopeptidase II) (EC 3.4.11.-) (YscII)	APE2 LAP1 YKL157W YKL158W YKL611 YKL612	Saccharomyces cerevisiae (strain ATCC 204508 / S288c) (Baker's yeast)	952	peptide catabolic process [GO:0043171]; proteolysis [GO:0006508]	cell wall-bounded periplasmic space [GO:0030287]; cytoplasm [GO:0005737]; extracellular region [GO:0005576]; mitochondrion [GO:0005739]; nucleus [GO:0005634]	cell wall-bounded periplasmic space [GO:0030287]; cytoplasm [GO:0005737]; extracellular region [GO:0005576]; mitochondrion [GO:0005739]; nucleus [GO:0005634]; metalloaminopeptidase activity [GO:0070006]; peptide binding [GO:0042277]; zinc ion binding [GO:0008270]; peptide catabolic process [GO:0043171]; proteolysis [GO:0006508]	SUBCELLULAR LOCATION: Periplasm. Cytoplasm. Mitochondrion.			metalloaminopeptidase activity [GO:0070006]; peptide binding [GO:0042277]; zinc ion binding [GO:0008270]	GO:0005576; GO:0005634; GO:0005737; GO:0005739; GO:0006508; GO:0008270; GO:0030287; GO:0042277; GO:0043171; GO:0070006	FALSE	0
Q12429	Q12429	reviewed	DPH6_YEAST	Diphthine--ammonia ligase (EC 6.3.1.14) (Diphthamide synthase) (Diphthamide synthetase)	DPH6 YLR143W L3177	Saccharomyces cerevisiae (strain ATCC 204508 / S288c) (Baker's yeast)	685	protein histidyl modification to diphthamide [GO:0017183]	cytoplasm [GO:0005737]	cytoplasm [GO:0005737]; ATP binding [GO:0005524]; diphthine-ammonia ligase activity [GO:0017178]; protein histidyl modification to diphthamide [GO:0017183]	SUBCELLULAR LOCATION: Cytoplasm {ECO:0000269|PubMed:14562095}.			ATP binding [GO:0005524]; diphthine-ammonia ligase activity [GO:0017178]	GO:0005524; GO:0005737; GO:0017178; GO:0017183	FALSE	0
P20434	P20434	reviewed	RPAB1_YEAST	DNA-directed RNA polymerases I, II, and III subunit RPABC1 (RNA polymerases I, II, and III subunit ABC1) (ABC27) (DNA-directed RNA polymerases I, II, and III 27 kDa polypeptide)	RPB5 RPA7 RPC9 YBR154C YBR1204	Saccharomyces cerevisiae (strain ATCC 204508 / S288c) (Baker's yeast)	215	nucleolar large rRNA transcription by RNA polymerase I [GO:0042790]; ribosome biogenesis [GO:0042254]; RNA-templated transcription [GO:0001172]; termination of RNA polymerase I transcription [GO:0006363]; termination of RNA polymerase III transcription [GO:0006386]; transcription by RNA polymerase I [GO:0006360]; transcription by RNA polymerase II [GO:0006366]; transcription by RNA polymerase III…	nucleoplasm [GO:0005654]; nucleus [GO:0005634]; RNA polymerase I complex [GO:0005736]; RNA polymerase II, core complex [GO:0005665]; RNA polymerase III complex [GO:0005666]	nucleoplasm [GO:0005654]; nucleus [GO:0005634]; RNA polymerase I complex [GO:0005736]; RNA polymerase II, core complex [GO:0005665]; RNA polymerase III complex [GO:0005666]; DNA binding [GO:0003677]; RNA polymerase I activity [GO:0001054]; nucleolar large rRNA transcription by RNA polymerase I [GO:0042790]; ribosome biogenesis [GO:0042254]; RNA-templated transcription [GO:0001172]; termination of…	SUBCELLULAR LOCATION: Nucleus.			DNA binding [GO:0003677]; RNA polymerase I activity [GO:0001054]	GO:0001054; GO:0001172; GO:0003677; GO:0005634; GO:0005654; GO:0005665; GO:0005666; GO:0005736; GO:0006360; GO:0006361; GO:0006362; GO:0006363; GO:0006366; GO:0006367; GO:0006368; GO:0006383; GO:0006384; GO:0006386; GO:0042254; GO:0042790; GO:0042797	FALSE	0
Q08096	Q08096	reviewed	RCL1_YEAST	RNA 3'-terminal phosphate cyclase-like protein	RCL1 RTC1 YOL010W	Saccharomyces cerevisiae (strain ATCC 204508 / S288c) (Baker's yeast)	367	endonucleolytic cleavage in 5'-ETS of tricistronic rRNA transcript (SSU-rRNA, 5.8S rRNA, LSU-rRNA) [GO:0000480]; endonucleolytic cleavage in ITS1 to separate SSU-rRNA from 5.8S rRNA and LSU-rRNA from tricistronic rRNA transcript (SSU-rRNA, 5.8S rRNA, LSU-rRNA) [GO:0000447]; endonucleolytic cleavage of tricistronic rRNA transcript (SSU-rRNA, 5.8S rRNA, LSU-rRNA) [GO:0000479]; endonucleolytic cleav…	90S preribosome [GO:0030686]; nucleolus [GO:0005730]; nucleoplasm [GO:0005654]; small-subunit processome [GO:0032040]	90S preribosome [GO:0030686]; nucleolus [GO:0005730]; nucleoplasm [GO:0005654]; small-subunit processome [GO:0032040]; enzyme activator activity [GO:0008047]; RNA endonuclease activity [GO:0004521]; endonucleolytic cleavage in 5'-ETS of tricistronic rRNA transcript (SSU-rRNA, 5.8S rRNA, LSU-rRNA) [GO:0000480]; endonucleolytic cleavage in ITS1 to separate SSU-rRNA from 5.8S rRNA and LSU-rRNA from …	SUBCELLULAR LOCATION: Nucleus, nucleolus.			enzyme activator activity [GO:0008047]; RNA endonuclease activity [GO:0004521]	GO:0000447; GO:0000472; GO:0000479; GO:0000480; GO:0004521; GO:0005654; GO:0005730; GO:0006364; GO:0008047; GO:0030490; GO:0030686; GO:0032040; GO:0042274; GO:2000232	FALSE	0
P40070	P40070	reviewed	LSM4_YEAST	U6 snRNA-associated Sm-like protein LSm4 (Like-SM protein 4)	LSM4 SDB23 USS1 YER112W	Saccharomyces cerevisiae (strain ATCC 204508 / S288c) (Baker's yeast)	187	deadenylation-dependent decapping of nuclear-transcribed mRNA [GO:0000290]; mRNA splicing, via spliceosome [GO:0000398]; P-body assembly [GO:0033962]; rRNA processing [GO:0006364]; spliceosomal snRNP assembly [GO:0000387]; tRNA processing [GO:0008033]	cytoplasm [GO:0005737]; Lsm1-7-Pat1 complex [GO:1990726]; nucleolus [GO:0005730]; nucleus [GO:0005634]; P-body [GO:0000932]; sno(s)RNA-containing ribonucleoprotein complex [GO:0005732]; spliceosomal complex [GO:0005681]; spliceosomal tri-snRNP complex [GO:0097526]; U4/U6 x U5 tri-snRNP complex [GO:0046540]; U6 snRNP [GO:0005688]	cytoplasm [GO:0005737]; Lsm1-7-Pat1 complex [GO:1990726]; nucleolus [GO:0005730]; nucleus [GO:0005634]; P-body [GO:0000932]; sno(s)RNA-containing ribonucleoprotein complex [GO:0005732]; spliceosomal complex [GO:0005681]; spliceosomal tri-snRNP complex [GO:0097526]; U4/U6 x U5 tri-snRNP complex [GO:0046540]; U6 snRNP [GO:0005688]; U6 snRNA binding [GO:0017070]; deadenylation-dependent decapping of…	SUBCELLULAR LOCATION: Nucleus {ECO:0000269|PubMed:14562095}. Cytoplasm {ECO:0000269|PubMed:14562095}.			U6 snRNA binding [GO:0017070]	GO:0000290; GO:0000387; GO:0000398; GO:0000932; GO:0005634; GO:0005681; GO:0005688; GO:0005730; GO:0005732; GO:0005737; GO:0006364; GO:0008033; GO:0017070; GO:0033962; GO:0046540; GO:0097526; GO:1990726	FALSE	0
Q6Q560	Q6Q560	reviewed	ISD11_YEAST	Protein ISD11 (Iron-sulfur protein biogenesis, desulfurase-interacting protein 11)	ISD11 YER048W-A	Saccharomyces cerevisiae (strain ATCC 204508 / S288c) (Baker's yeast)	94	iron-sulfur cluster assembly [GO:0016226]	iron-sulfur cluster assembly complex [GO:1990229]; L-cysteine desulfurase complex [GO:1990221]; mitochondrial matrix [GO:0005759]; mitochondrion [GO:0005739]	iron-sulfur cluster assembly complex [GO:1990229]; L-cysteine desulfurase complex [GO:1990221]; mitochondrial matrix [GO:0005759]; mitochondrion [GO:0005739]; iron-sulfur cluster assembly [GO:0016226]	SUBCELLULAR LOCATION: Mitochondrion {ECO:0000269|PubMed:14562095, ECO:0000269|PubMed:16341090, ECO:0000269|PubMed:16823961}.				GO:0005739; GO:0005759; GO:0016226; GO:1990221; GO:1990229	FALSE	0
P53254	P53254	reviewed	UTP22_YEAST	U3 small nucleolar RNA-associated protein 22 (U3 snoRNA-associated protein 22) (U three protein 22)	UTP22 YGR090W	Saccharomyces cerevisiae (strain ATCC 204508 / S288c) (Baker's yeast)	1237	maturation of SSU-rRNA [GO:0030490]; nucleolar large rRNA transcription by RNA polymerase I [GO:0042790]; regulation of ribosomal protein gene transcription by RNA polymerase II [GO:0060962]; ribosomal small subunit assembly [GO:0000028]; rRNA processing [GO:0006364]; tRNA export from nucleus [GO:0006409]	90S preribosome [GO:0030686]; CURI complex [GO:0032545]; nucleolus [GO:0005730]; nucleoplasm [GO:0005654]; nucleus [GO:0005634]; small-subunit processome [GO:0032040]; UTP-C complex [GO:0034456]	90S preribosome [GO:0030686]; CURI complex [GO:0032545]; nucleolus [GO:0005730]; nucleoplasm [GO:0005654]; nucleus [GO:0005634]; small-subunit processome [GO:0032040]; UTP-C complex [GO:0034456]; RNA binding [GO:0003723]; maturation of SSU-rRNA [GO:0030490]; nucleolar large rRNA transcription by RNA polymerase I [GO:0042790]; regulation of ribosomal protein gene transcription by RNA polymerase II…	SUBCELLULAR LOCATION: Nucleus, nucleolus {ECO:0000269|PubMed:14562095, ECO:0000269|PubMed:15590835}.			RNA binding [GO:0003723]	GO:0000028; GO:0003723; GO:0005634; GO:0005654; GO:0005730; GO:0006364; GO:0006409; GO:0030490; GO:0030686; GO:0032040; GO:0032545; GO:0034456; GO:0042790; GO:0060962	FALSE	0
P48445	P48445	reviewed	BPL1_YEAST	Biotin--protein ligase (EC 6.3.4.-) (Biotin apo-protein ligase) [Includes: Biotin--[methylmalonyl-CoA-carboxytransferase] ligase (EC 6.3.4.9); Biotin--[propionyl-CoA-carboxylase [ATP-hydrolyzing]] ligase (EC 6.3.4.10) (Holocarboxylase synthetase) (HCS); Biotin--[methylcrotonoyl-CoA-carboxylase] ligase (EC 6.3.4.11); Biotin--[acetyl-CoA-carboxylase] ligase (EC 6.3.4.15)]	BPL1 ACC2 YDL141W D2140	Saccharomyces cerevisiae (strain ATCC 204508 / S288c) (Baker's yeast)	690	protein modification process [GO:0036211]	cytoplasm [GO:0005737]; nucleus [GO:0005634]	cytoplasm [GO:0005737]; nucleus [GO:0005634]; ATP binding [GO:0005524]; biotin-[acetyl-CoA-carboxylase] ligase activity [GO:0004077]; biotin-[methylcrotonoyl-CoA-carboxylase] ligase activity [GO:0004078]; biotin-[methylmalonyl-CoA-carboxytransferase] ligase activity [GO:0004079]; biotin-[propionyl-CoA-carboxylase (ATP-hydrolyzing)] ligase activity [GO:0004080]; biotin-[pyruvate-carboxylase] ligas…	SUBCELLULAR LOCATION: Cytoplasm {ECO:0000269|PubMed:14562095}.			ATP binding [GO:0005524]; biotin-[acetyl-CoA-carboxylase] ligase activity [GO:0004077]; biotin-[methylcrotonoyl-CoA-carboxylase] ligase activity [GO:0004078]; biotin-[methylmalonyl-CoA-carboxytransferase] ligase activity [GO:0004079]; biotin-[propionyl-CoA-carboxylase (ATP-hydrolyzing)] ligase activity [GO:0004080]; biotin-[pyruvate-carboxylase] ligase activity [GO:0071734]	GO:0004077; GO:0004078; GO:0004079; GO:0004080; GO:0005524; GO:0005634; GO:0005737; GO:0036211; GO:0071734	FALSE	0
Q05881	Q05881	reviewed	YL287_YEAST	Uncharacterized protein YLR287C	YLR287C	Saccharomyces cerevisiae (strain ATCC 204508 / S288c) (Baker's yeast)	355	regulation of cell cycle [GO:0051726]	cytoplasm [GO:0005737]; nucleus [GO:0005634]	cytoplasm [GO:0005737]; nucleus [GO:0005634]; regulation of cell cycle [GO:0051726]	SUBCELLULAR LOCATION: Cytoplasm {ECO:0000269|PubMed:14562095}.				GO:0005634; GO:0005737; GO:0051726	FALSE	0
Q02046	Q02046	reviewed	MTD1_YEAST	Methylenetetrahydrofolate dehydrogenase [NAD(+)] (EC 1.5.1.15)	MTD1 YKR080W YKR400	Saccharomyces cerevisiae (strain ATCC 204508 / S288c) (Baker's yeast)	320	folic acid-containing compound biosynthetic process [GO:0009396]; one-carbon metabolic process [GO:0006730]; purine nucleobase biosynthetic process [GO:0009113]; purine nucleotide biosynthetic process [GO:0006164]	cytosol [GO:0005829]; nucleus [GO:0005634]	cytosol [GO:0005829]; nucleus [GO:0005634]; methylenetetrahydrofolate dehydrogenase (NAD+) activity [GO:0004487]; methylenetetrahydrofolate dehydrogenase (NADP+) activity [GO:0004488]; folic acid-containing compound biosynthetic process [GO:0009396]; one-carbon metabolic process [GO:0006730]; purine nucleobase biosynthetic process [GO:0009113]; purine nucleotide biosynthetic process [GO:0006164]	SUBCELLULAR LOCATION: Cytoplasm {ECO:0000269|PubMed:14562095}. Nucleus {ECO:0000269|PubMed:14562095}.			methylenetetrahydrofolate dehydrogenase (NAD+) activity [GO:0004487]; methylenetetrahydrofolate dehydrogenase (NADP+) activity [GO:0004488]	GO:0004487; GO:0004488; GO:0005634; GO:0005829; GO:0006164; GO:0006730; GO:0009113; GO:0009396	FALSE	0
Q12221	Q12221	reviewed	PUF2_YEAST	mRNA-binding protein PUF2 (Pumilio homology domain family member 2)	PUF2 YPR042C YP3085.06c YP9499.01	Saccharomyces cerevisiae (strain ATCC 204508 / S288c) (Baker's yeast)	1075	nuclear-transcribed mRNA catabolic process, deadenylation-dependent decay [GO:0000288]	cytoplasm [GO:0005737]; P-body [GO:0000932]	cytoplasm [GO:0005737]; P-body [GO:0000932]; mRNA 3'-UTR AU-rich region binding [GO:0035925]; mRNA binding [GO:0003729]; nuclear-transcribed mRNA catabolic process, deadenylation-dependent decay [GO:0000288]	SUBCELLULAR LOCATION: Cytoplasm {ECO:0000269|PubMed:14562095, ECO:0000269|PubMed:15024427}. Note=Localizes to foci enriched near the periphery of the cell.			mRNA 3'-UTR AU-rich region binding [GO:0035925]; mRNA binding [GO:0003729]	GO:0000288; GO:0000932; GO:0003729; GO:0005737; GO:0035925	FALSE	0
P25374	P25374	reviewed	NFS1_YEAST	Cysteine desulfurase, mitochondrial (EC 2.8.1.7) (tRNA-splicing protein SPL1)	NFS1 SPL1 YCL017C	Saccharomyces cerevisiae (strain ATCC 204508 / S288c) (Baker's yeast)	497	[2Fe-2S] cluster assembly [GO:0044571]; intracellular iron ion homeostasis [GO:0006879]; iron-sulfur cluster assembly [GO:0016226]; mitochondrial tRNA thio-modification [GO:0070903]; tRNA thio-modification [GO:0034227]; tRNA wobble uridine modification [GO:0002098]	cytosol [GO:0005829]; iron-sulfur cluster assembly complex [GO:1990229]; L-cysteine desulfurase complex [GO:1990221]; mitochondrion [GO:0005739]; nucleus [GO:0005634]	cytosol [GO:0005829]; iron-sulfur cluster assembly complex [GO:1990229]; L-cysteine desulfurase complex [GO:1990221]; mitochondrion [GO:0005739]; nucleus [GO:0005634]; cysteine desulfurase activity [GO:0031071]; iron-sulfur cluster binding [GO:0051536]; metal ion binding [GO:0046872]; pyridoxal phosphate binding [GO:0030170]; [2Fe-2S] cluster assembly [GO:0044571]; intracellular iron ion homeosta…	SUBCELLULAR LOCATION: Mitochondrion {ECO:0000269|PubMed:10406803, ECO:0000269|PubMed:10551871}.			cysteine desulfurase activity [GO:0031071]; iron-sulfur cluster binding [GO:0051536]; metal ion binding [GO:0046872]; pyridoxal phosphate binding [GO:0030170]	GO:0002098; GO:0005634; GO:0005739; GO:0005829; GO:0006879; GO:0016226; GO:0030170; GO:0031071; GO:0034227; GO:0044571; GO:0046872; GO:0051536; GO:0070903; GO:1990221; GO:1990229	FALSE	0
P39990	P39990	reviewed	SNU13_YEAST	13 kDa ribonucleoprotein-associated protein (Small nuclear ribonucleoprotein-associated protein 1)	SNU13 YEL026W	Saccharomyces cerevisiae (strain ATCC 204508 / S288c) (Baker's yeast)	126	box C/D RNA 3'-end processing [GO:0000494]; maturation of LSU-rRNA [GO:0000470]; maturation of SSU-rRNA [GO:0030490]; maturation of SSU-rRNA from tricistronic rRNA transcript (SSU-rRNA, 5.8S rRNA, LSU-rRNA) [GO:0000462]; mRNA splicing, via spliceosome [GO:0000398]; positive regulation of RNA binding [GO:1905216]; snoRNA guided rRNA 2'-O-methylation [GO:0000452]	box C/D RNP complex [GO:0031428]; cytosolic large ribosomal subunit [GO:0022625]; nucleolus [GO:0005730]; nucleoplasm [GO:0005654]; precatalytic spliceosome [GO:0071011]; small-subunit processome [GO:0032040]; U4/U6 x U5 tri-snRNP complex [GO:0046540]	box C/D RNP complex [GO:0031428]; cytosolic large ribosomal subunit [GO:0022625]; nucleolus [GO:0005730]; nucleoplasm [GO:0005654]; precatalytic spliceosome [GO:0071011]; small-subunit processome [GO:0032040]; U4/U6 x U5 tri-snRNP complex [GO:0046540]; RNA binding [GO:0003723]; U3 snoRNA binding [GO:0034511]; U4 snRNA binding [GO:0030621]; box C/D RNA 3'-end processing [GO:0000494]; maturation of…	SUBCELLULAR LOCATION: Nucleus, nucleolus.			RNA binding [GO:0003723]; U3 snoRNA binding [GO:0034511]; U4 snRNA binding [GO:0030621]	GO:0000398; GO:0000452; GO:0000462; GO:0000470; GO:0000494; GO:0003723; GO:0005654; GO:0005730; GO:0022625; GO:0030490; GO:0030621; GO:0031428; GO:0032040; GO:0034511; GO:0046540; GO:0071011; GO:1905216	FALSE	0
P26755	P26755	reviewed	RFA3_YEAST	Replication factor A protein 3 (RF-A) (Replication protein A 13 kDa subunit)	RFA3 YJL173C J0506	Saccharomyces cerevisiae (strain ATCC 204508 / S288c) (Baker's yeast)	122	DNA repair [GO:0006281]; DNA replication [GO:0006260]; DNA topological change [GO:0006265]; DNA unwinding involved in DNA replication [GO:0006268]; double-strand break repair via homologous recombination [GO:0000724]; establishment of protein localization [GO:0045184]; heteroduplex formation [GO:0030491]; mitotic recombination [GO:0006312]; nucleotide-excision repair [GO:0006289]; protein ubiquit…	chromosome, telomeric region [GO:0000781]; condensed nuclear chromosome [GO:0000794]; DNA replication factor A complex [GO:0005662]	chromosome, telomeric region [GO:0000781]; condensed nuclear chromosome [GO:0000794]; DNA replication factor A complex [GO:0005662]; double-stranded DNA binding [GO:0003690]; sequence-specific DNA binding [GO:0043565]; DNA repair [GO:0006281]; DNA replication [GO:0006260]; DNA topological change [GO:0006265]; DNA unwinding involved in DNA replication [GO:0006268]; double-strand break repair via h…	SUBCELLULAR LOCATION: Nucleus.			double-stranded DNA binding [GO:0003690]; sequence-specific DNA binding [GO:0043565]	GO:0000722; GO:0000724; GO:0000781; GO:0000794; GO:0003690; GO:0005662; GO:0006260; GO:0006265; GO:0006268; GO:0006281; GO:0006289; GO:0006312; GO:0007004; GO:0007131; GO:0010833; GO:0016567; GO:0030491; GO:0043565; GO:0045184	FALSE	0
Q02486	Q02486	reviewed	ABF2_YEAST	ARS-binding factor 2, mitochondrial	ABF2 HIM1 YMR072W YM9916.11	Saccharomyces cerevisiae (strain ATCC 204508 / S288c) (Baker's yeast)	183	mitochondrial chromosome packaging [GO:0090139]; mitochondrial genome maintenance [GO:0000002]; mitochondrion inheritance [GO:0000001]	mitochondrial chromosome [GO:0000262]; mitochondrial nucleoid [GO:0042645]; mitochondrion [GO:0005739]; nucleus [GO:0005634]	mitochondrial chromosome [GO:0000262]; mitochondrial nucleoid [GO:0042645]; mitochondrion [GO:0005739]; nucleus [GO:0005634]; DNA binding [GO:0003677]; DNA binding, bending [GO:0008301]; mitochondrial chromosome packaging [GO:0090139]; mitochondrial genome maintenance [GO:0000002]; mitochondrion inheritance [GO:0000001]	SUBCELLULAR LOCATION: Mitochondrion. Nucleus {ECO:0000305}.			DNA binding [GO:0003677]; DNA binding, bending [GO:0008301]	GO:0000001; GO:0000002; GO:0000262; GO:0003677; GO:0005634; GO:0005739; GO:0008301; GO:0042645; GO:0090139	FALSE	0
P40467	P40467	reviewed	ASG1_YEAST	Activator of stress genes 1	ASG1 YIL130W	Saccharomyces cerevisiae (strain ATCC 204508 / S288c) (Baker's yeast)	964	DNA-templated transcription [GO:0006351]; positive regulation of transcription by RNA polymerase II [GO:0045944]	nucleus [GO:0005634]	nucleus [GO:0005634]; DNA-binding transcription factor activity, RNA polymerase II-specific [GO:0000981]; sequence-specific DNA binding [GO:0043565]; zinc ion binding [GO:0008270]; DNA-templated transcription [GO:0006351]; positive regulation of transcription by RNA polymerase II [GO:0045944]	SUBCELLULAR LOCATION: Nucleus {ECO:0000255|PROSITE-ProRule:PRU00227, ECO:0000269|PubMed:14562095}.			DNA-binding transcription factor activity, RNA polymerase II-specific [GO:0000981]; sequence-specific DNA binding [GO:0043565]; zinc ion binding [GO:0008270]	GO:0000981; GO:0005634; GO:0006351; GO:0008270; GO:0043565; GO:0045944	FALSE	0
Q03161	Q03161	reviewed	YMY9_YEAST	Glucose-6-phosphate 1-epimerase (EC 5.1.3.15) (D-hexose-6-phosphate mutarotase)	YMR099C YM6543.06C	Saccharomyces cerevisiae (strain ATCC 204508 / S288c) (Baker's yeast)	297	carbohydrate metabolic process [GO:0005975]	cytoplasm [GO:0005737]; nucleus [GO:0005634]	cytoplasm [GO:0005737]; nucleus [GO:0005634]; carbohydrate binding [GO:0030246]; glucose-6-phosphate 1-epimerase activity [GO:0047938]; carbohydrate metabolic process [GO:0005975]				carbohydrate binding [GO:0030246]; glucose-6-phosphate 1-epimerase activity [GO:0047938]	GO:0005634; GO:0005737; GO:0005975; GO:0030246; GO:0047938	FALSE	0
P0CH09	P0CH09	reviewed	RL40B_YEAST	Ubiquitin-ribosomal protein eL40B fusion protein [Cleaved into: Ubiquitin; Large ribosomal subunit protein eL40B (60S ribosomal protein L40-B) (CEP52)]	RPL40B UBI2 YKR094C	Saccharomyces cerevisiae (strain ATCC 204508 / S288c) (Baker's yeast)	128	cytoplasmic translation [GO:0002181]; modification-dependent protein catabolic process [GO:0019941]; protein ubiquitination [GO:0016567]; ribosomal large subunit assembly [GO:0000027]; ribosomal large subunit export from nucleus [GO:0000055]; ribosome biogenesis [GO:0042254]	cytosol [GO:0005829]; cytosolic large ribosomal subunit [GO:0022625]; mitochondrion [GO:0005739]; nucleus [GO:0005634]	cytosol [GO:0005829]; cytosolic large ribosomal subunit [GO:0022625]; mitochondrion [GO:0005739]; nucleus [GO:0005634]; protein tag activity [GO:0031386]; structural constituent of ribosome [GO:0003735]; ubiquitin protein ligase binding [GO:0031625]; cytoplasmic translation [GO:0002181]; modification-dependent protein catabolic process [GO:0019941]; protein ubiquitination [GO:0016567]; ribosomal …	SUBCELLULAR LOCATION: [Ubiquitin]: Cytoplasm {ECO:0000250}. Nucleus {ECO:0000250}.; SUBCELLULAR LOCATION: [Large ribosomal subunit protein eL40B]: Cytoplasm {ECO:0000269|PubMed:22096102}.			protein tag activity [GO:0031386]; structural constituent of ribosome [GO:0003735]; ubiquitin protein ligase binding [GO:0031625]	GO:0000027; GO:0000055; GO:0002181; GO:0003735; GO:0005634; GO:0005739; GO:0005829; GO:0016567; GO:0019941; GO:0022625; GO:0031386; GO:0031625; GO:0042254	FALSE	0
Q04201	Q04201	reviewed	CUE4_YEAST	CUE domain-containing protein CUE4 (Coupling of ubiquitin conjugation to ER degradation protein 4)	CUE4 YML101C	Saccharomyces cerevisiae (strain ATCC 204508 / S288c) (Baker's yeast)	117		cytoplasm [GO:0005737]; endoplasmic reticulum [GO:0005783]	cytoplasm [GO:0005737]; endoplasmic reticulum [GO:0005783]; ubiquitin binding [GO:0043130]	SUBCELLULAR LOCATION: Cytoplasm {ECO:0000269|PubMed:11914276}. Endoplasmic reticulum {ECO:0000269|PubMed:14562095}.			ubiquitin binding [GO:0043130]	GO:0005737; GO:0005783; GO:0043130	FALSE	0
P38063	P38063	reviewed	KPR4_YEAST	Ribose-phosphate pyrophosphokinase 4 (EC 2.7.6.1) (Phosphoribosyl pyrophosphate synthase 4)	PRS4 PRPS4 YBL068W YBL0619	Saccharomyces cerevisiae (strain ATCC 204508 / S288c) (Baker's yeast)	326	5-phosphoribose 1-diphosphate biosynthetic process [GO:0006015]; fungal-type cell wall organization [GO:0031505]; phosphorylation [GO:0016310]; purine nucleotide biosynthetic process [GO:0006164]; ribonucleoside monophosphate biosynthetic process [GO:0009156]	cytoplasm [GO:0005737]; ribose phosphate diphosphokinase complex [GO:0002189]	cytoplasm [GO:0005737]; ribose phosphate diphosphokinase complex [GO:0002189]; ATP binding [GO:0005524]; kinase activity [GO:0016301]; magnesium ion binding [GO:0000287]; ribose phosphate diphosphokinase activity [GO:0004749]; 5-phosphoribose 1-diphosphate biosynthetic process [GO:0006015]; fungal-type cell wall organization [GO:0031505]; phosphorylation [GO:0016310]; purine nucleotide biosynthet…	SUBCELLULAR LOCATION: Cytoplasm {ECO:0000269|PubMed:14562095}.			ATP binding [GO:0005524]; kinase activity [GO:0016301]; magnesium ion binding [GO:0000287]; ribose phosphate diphosphokinase activity [GO:0004749]	GO:0000287; GO:0002189; GO:0004749; GO:0005524; GO:0005737; GO:0006015; GO:0006164; GO:0009156; GO:0016301; GO:0016310; GO:0031505	FALSE	0
P40016	P40016	reviewed	RPN3_YEAST	26S proteasome regulatory subunit RPN3	RPN3 SUN2 YER021W	Saccharomyces cerevisiae (strain ATCC 204508 / S288c) (Baker's yeast)	523	proteasome-mediated ubiquitin-dependent protein catabolic process [GO:0043161]; regulation of protein catabolic process [GO:0042176]; ubiquitin-dependent protein catabolic process [GO:0006511]	proteasome complex [GO:0000502]; proteasome regulatory particle, lid subcomplex [GO:0008541]	proteasome complex [GO:0000502]; proteasome regulatory particle, lid subcomplex [GO:0008541]; enzyme regulator activity [GO:0030234]; proteasome-mediated ubiquitin-dependent protein catabolic process [GO:0043161]; regulation of protein catabolic process [GO:0042176]; ubiquitin-dependent protein catabolic process [GO:0006511]				enzyme regulator activity [GO:0030234]	GO:0000502; GO:0006511; GO:0008541; GO:0030234; GO:0042176; GO:0043161	FALSE	0
Q12109	Q12109	reviewed	SYWC_YEAST	Tryptophan--tRNA ligase, cytoplasmic (EC 6.1.1.2) (Tryptophanyl-tRNA synthetase) (TrpRS)	WRS1 YOL097C HRE432	Saccharomyces cerevisiae (strain ATCC 204508 / S288c) (Baker's yeast)	432	tryptophanyl-tRNA aminoacylation [GO:0006436]	cytoplasm [GO:0005737]	cytoplasm [GO:0005737]; ATP binding [GO:0005524]; tryptophan-tRNA ligase activity [GO:0004830]; tryptophanyl-tRNA aminoacylation [GO:0006436]	SUBCELLULAR LOCATION: Cytoplasm.			ATP binding [GO:0005524]; tryptophan-tRNA ligase activity [GO:0004830]	GO:0004830; GO:0005524; GO:0005737; GO:0006436	FALSE	0
P36150	P36150	reviewed	SUMT_YEAST	Uroporphyrinogen-III C-methyltransferase (Urogen III methylase) (EC 2.1.1.107) (SUMT) (Uroporphyrinogen III methylase) (UROM)	MET1 MET20 YKR069W	Saccharomyces cerevisiae (strain ATCC 204508 / S288c) (Baker's yeast)	593	methionine biosynthetic process [GO:0009086]; methylation [GO:0032259]; siroheme biosynthetic process [GO:0019354]; sulfate assimilation [GO:0000103]	nucleus [GO:0005634]	nucleus [GO:0005634]; uroporphyrin-III C-methyltransferase activity [GO:0004851]; methionine biosynthetic process [GO:0009086]; methylation [GO:0032259]; siroheme biosynthetic process [GO:0019354]; sulfate assimilation [GO:0000103]				uroporphyrin-III C-methyltransferase activity [GO:0004851]	GO:0000103; GO:0004851; GO:0005634; GO:0009086; GO:0019354; GO:0032259	FALSE	0
P23724	P23724	reviewed	PSB6_YEAST	Proteasome subunit beta type-6 (Multicatalytic endopeptidase complex subunit C5) (Proteasome component C5)	PRE7 PRS3 PTS1 YBL041W YBL0407	Saccharomyces cerevisiae (strain ATCC 204508 / S288c) (Baker's yeast)	241	proteasomal protein catabolic process [GO:0010498]; proteasomal ubiquitin-independent protein catabolic process [GO:0010499]; proteasome-mediated ubiquitin-dependent protein catabolic process [GO:0043161]	cytosol [GO:0005829]; nucleus [GO:0005634]; proteasome complex [GO:0000502]; proteasome core complex, beta-subunit complex [GO:0019774]	cytosol [GO:0005829]; nucleus [GO:0005634]; proteasome complex [GO:0000502]; proteasome core complex, beta-subunit complex [GO:0019774]; proteasomal protein catabolic process [GO:0010498]; proteasomal ubiquitin-independent protein catabolic process [GO:0010499]; proteasome-mediated ubiquitin-dependent protein catabolic process [GO:0043161]	SUBCELLULAR LOCATION: Cytoplasm. Nucleus.				GO:0000502; GO:0005634; GO:0005829; GO:0010498; GO:0010499; GO:0019774; GO:0043161	FALSE	0
Q06205	Q06205	reviewed	FKBP4_YEAST	FK506-binding protein 4 (EC 5.2.1.8) (Histone proline isomerase) (Peptidyl-prolyl cis-trans isomerase) (PPIase) (Rotamase)	FPR4 YLR449W L9324.3	Saccharomyces cerevisiae (strain ATCC 204508 / S288c) (Baker's yeast)	392	epigenetic regulation of gene expression [GO:0040029]; nucleosome assembly [GO:0006334]	chromatin [GO:0000785]; nucleolus [GO:0005730]; nucleus [GO:0005634]	chromatin [GO:0000785]; nucleolus [GO:0005730]; nucleus [GO:0005634]; macrolide binding [GO:0005527]; peptidyl-prolyl cis-trans isomerase activity [GO:0003755]; epigenetic regulation of gene expression [GO:0040029]; nucleosome assembly [GO:0006334]	SUBCELLULAR LOCATION: Nucleus {ECO:0000269|PubMed:14981505, ECO:0000269|PubMed:9371805}.			macrolide binding [GO:0005527]; peptidyl-prolyl cis-trans isomerase activity [GO:0003755]	GO:0000785; GO:0003755; GO:0005527; GO:0005634; GO:0005730; GO:0006334; GO:0040029	FALSE	0
P33401	P33401	reviewed	PGM1_YEAST	Phosphoglucomutase 1 (PGM 1) (EC 5.4.2.2) (Glucose phosphomutase 1)	PGM1 YKL127W	Saccharomyces cerevisiae (strain ATCC 204508 / S288c) (Baker's yeast)	570	carbohydrate metabolic process [GO:0005975]; galactose catabolic process [GO:0019388]; glucose 1-phosphate metabolic process [GO:0019255]; glucose 6-phosphate metabolic process [GO:0051156]; glucose metabolic process [GO:0006006]; glycogen biosynthetic process [GO:0005978]; trehalose biosynthetic process [GO:0005992]; UDP-glucose metabolic process [GO:0006011]	cytoplasm [GO:0005737]; cytosol [GO:0005829]	cytoplasm [GO:0005737]; cytosol [GO:0005829]; magnesium ion binding [GO:0000287]; phosphoglucomutase activity [GO:0004614]; carbohydrate metabolic process [GO:0005975]; galactose catabolic process [GO:0019388]; glucose 1-phosphate metabolic process [GO:0019255]; glucose 6-phosphate metabolic process [GO:0051156]; glucose metabolic process [GO:0006006]; glycogen biosynthetic process [GO:0005978]; …	SUBCELLULAR LOCATION: Cytoplasm {ECO:0000269|PubMed:14562095}.			magnesium ion binding [GO:0000287]; phosphoglucomutase activity [GO:0004614]	GO:0000287; GO:0004614; GO:0005737; GO:0005829; GO:0005975; GO:0005978; GO:0005992; GO:0006006; GO:0006011; GO:0019255; GO:0019388; GO:0051156	FALSE	0
P32899	P32899	reviewed	IMP3_YEAST	U3 small nucleolar ribonucleoprotein protein IMP3 (U3 snoRNP protein IMP3) (Interacting with MPP10 protein 3)	IMP3 YHR148W	Saccharomyces cerevisiae (strain ATCC 204508 / S288c) (Baker's yeast)	183	maturation of SSU-rRNA [GO:0030490]; ribosomal small subunit biogenesis [GO:0042274]; rRNA processing [GO:0006364]	90S preribosome [GO:0030686]; Mpp10 complex [GO:0034457]; nucleolus [GO:0005730]; nucleoplasm [GO:0005654]; small ribosomal subunit [GO:0015935]; small-subunit processome [GO:0032040]	90S preribosome [GO:0030686]; Mpp10 complex [GO:0034457]; nucleolus [GO:0005730]; nucleoplasm [GO:0005654]; small ribosomal subunit [GO:0015935]; small-subunit processome [GO:0032040]; rRNA binding [GO:0019843]; snoRNA binding [GO:0030515]; structural constituent of ribosome [GO:0003735]; maturation of SSU-rRNA [GO:0030490]; ribosomal small subunit biogenesis [GO:0042274]; rRNA processing [GO:000…	SUBCELLULAR LOCATION: Nucleus, nucleolus {ECO:0000269|PubMed:10409734}.			rRNA binding [GO:0019843]; snoRNA binding [GO:0030515]; structural constituent of ribosome [GO:0003735]	GO:0003735; GO:0005654; GO:0005730; GO:0006364; GO:0015935; GO:0019843; GO:0030490; GO:0030515; GO:0030686; GO:0032040; GO:0034457; GO:0042274	FALSE	0
P39994	P39994	reviewed	PXP1_YEAST	Putative 2-hydroxyacyl-CoA lyase (EC 4.1.-.-) (Peroxisomal protein 1)	PXP1 YEL020C	Saccharomyces cerevisiae (strain ATCC 204508 / S288c) (Baker's yeast)	560	fatty acid alpha-oxidation [GO:0001561]	cytoplasm [GO:0005737]; peroxisomal matrix [GO:0005782]; peroxisome [GO:0005777]	cytoplasm [GO:0005737]; peroxisomal matrix [GO:0005782]; peroxisome [GO:0005777]; carbon-carbon lyase activity [GO:0016830]; carboxy-lyase activity [GO:0016831]; magnesium ion binding [GO:0000287]; thiamine pyrophosphate binding [GO:0030976]; fatty acid alpha-oxidation [GO:0001561]	SUBCELLULAR LOCATION: Cytoplasm {ECO:0000269|PubMed:14562095}. Peroxisome matrix {ECO:0000269|PubMed:26928762, ECO:0000269|PubMed:27392156}.			carbon-carbon lyase activity [GO:0016830]; carboxy-lyase activity [GO:0016831]; magnesium ion binding [GO:0000287]; thiamine pyrophosphate binding [GO:0030976]	GO:0000287; GO:0001561; GO:0005737; GO:0005777; GO:0005782; GO:0016830; GO:0016831; GO:0030976	FALSE	0
P53734	P53734	reviewed	DBP6_YEAST	ATP-dependent RNA helicase DBP6 (EC 3.6.4.13) (DEAD box protein 6)	DBP6 YNR038W N3302	Saccharomyces cerevisiae (strain ATCC 204508 / S288c) (Baker's yeast)	629	maturation of 5.8S rRNA from tricistronic rRNA transcript (SSU-rRNA, 5.8S rRNA, LSU-rRNA) [GO:0000466]; maturation of LSU-rRNA from tricistronic rRNA transcript (SSU-rRNA, 5.8S rRNA, LSU-rRNA) [GO:0000463]; ribosomal large subunit biogenesis [GO:0042273]	nucleolus [GO:0005730]; nucleus [GO:0005634]; preribosome, large subunit precursor [GO:0030687]	nucleolus [GO:0005730]; nucleus [GO:0005634]; preribosome, large subunit precursor [GO:0030687]; ATP binding [GO:0005524]; ATP hydrolysis activity [GO:0016887]; RNA binding [GO:0003723]; RNA helicase activity [GO:0003724]; maturation of 5.8S rRNA from tricistronic rRNA transcript (SSU-rRNA, 5.8S rRNA, LSU-rRNA) [GO:0000466]; maturation of LSU-rRNA from tricistronic rRNA transcript (SSU-rRNA, 5.8S…	SUBCELLULAR LOCATION: Nucleus, nucleolus {ECO:0000269|PubMed:14562095, ECO:0000269|PubMed:9528757}.			ATP binding [GO:0005524]; ATP hydrolysis activity [GO:0016887]; RNA binding [GO:0003723]; RNA helicase activity [GO:0003724]	GO:0000463; GO:0000466; GO:0003723; GO:0003724; GO:0005524; GO:0005634; GO:0005730; GO:0016887; GO:0030687; GO:0042273	FALSE	0
P38998	P38998	reviewed	LYS1_YEAST	Saccharopine dehydrogenase [NAD(+), L-lysine-forming] (SDH) (EC 1.5.1.7) (Lysine--2-oxoglutarate reductase)	LYS1 YIR034C	Saccharomyces cerevisiae (strain ATCC 204508 / S288c) (Baker's yeast)	373	lysine biosynthetic process [GO:0009085]; lysine biosynthetic process via aminoadipic acid [GO:0019878]	cytoplasm [GO:0005737]; peroxisome [GO:0005777]	cytoplasm [GO:0005737]; peroxisome [GO:0005777]; mRNA binding [GO:0003729]; saccharopine dehydrogenase (NAD+, L-lysine-forming) activity [GO:0004754]; saccharopine dehydrogenase activity [GO:0004753]; lysine biosynthetic process [GO:0009085]; lysine biosynthetic process via aminoadipic acid [GO:0019878]	SUBCELLULAR LOCATION: Peroxisome {ECO:0000269|PubMed:26928762, ECO:0000269|PubMed:28928432}.			mRNA binding [GO:0003729]; saccharopine dehydrogenase (NAD+, L-lysine-forming) activity [GO:0004754]; saccharopine dehydrogenase activity [GO:0004753]	GO:0003729; GO:0004753; GO:0004754; GO:0005737; GO:0005777; GO:0009085; GO:0019878	FALSE	0
P32501	P32501	reviewed	EI2BE_YEAST	Translation initiation factor eIF-2B subunit epsilon (GCD complex subunit GCD6) (Guanine nucleotide exchange factor subunit GCD6) (eIF-2B GDP-GTP exchange factor subunit epsilon)	GCD6 TIF225 YDR211W YD8142.12 YD8142B.03	Saccharomyces cerevisiae (strain ATCC 204508 / S288c) (Baker's yeast)	712	regulation of translational initiation [GO:0006446]	cytoplasm [GO:0005737]; cytosol [GO:0005829]; eukaryotic translation initiation factor 2B complex [GO:0005851]; guanyl-nucleotide exchange factor complex [GO:0032045]	cytoplasm [GO:0005737]; cytosol [GO:0005829]; eukaryotic translation initiation factor 2B complex [GO:0005851]; guanyl-nucleotide exchange factor complex [GO:0032045]; guanyl-nucleotide exchange factor activity [GO:0005085]; translation initiation factor activity [GO:0003743]; translation initiation factor binding [GO:0031369]; regulation of translational initiation [GO:0006446]				guanyl-nucleotide exchange factor activity [GO:0005085]; translation initiation factor activity [GO:0003743]; translation initiation factor binding [GO:0031369]	GO:0003743; GO:0005085; GO:0005737; GO:0005829; GO:0005851; GO:0006446; GO:0031369; GO:0032045	FALSE	0
Q08920	Q08920	reviewed	NCBP2_YEAST	Nuclear cap-binding protein subunit 2 (20 kDa nuclear cap-binding protein) (NCBP 20 kDa subunit) (CBP20)	CBC2 CBP20 MUD13 SAE1 YPL178W	Saccharomyces cerevisiae (strain ATCC 204508 / S288c) (Baker's yeast)	208	mRNA 3'-end processing [GO:0031124]; mRNA cis splicing, via spliceosome [GO:0045292]; mRNA export from nucleus [GO:0006406]; mRNA splicing, via spliceosome [GO:0000398]; mRNA transcription by RNA polymerase II [GO:0042789]; nuclear-transcribed mRNA catabolic process [GO:0000956]; nuclear-transcribed mRNA catabolic process, nonsense-mediated decay [GO:0000184]; primary miRNA processing [GO:0031053…	commitment complex [GO:0000243]; mRNA cap binding complex [GO:0005845]; nuclear cap binding complex [GO:0005846]; nucleus [GO:0005634]; perinuclear region of cytoplasm [GO:0048471]	commitment complex [GO:0000243]; mRNA cap binding complex [GO:0005845]; nuclear cap binding complex [GO:0005846]; nucleus [GO:0005634]; perinuclear region of cytoplasm [GO:0048471]; RNA cap binding [GO:0000339]; mRNA 3'-end processing [GO:0031124]; mRNA cis splicing, via spliceosome [GO:0045292]; mRNA export from nucleus [GO:0006406]; mRNA splicing, via spliceosome [GO:0000398]; mRNA transcriptio…	SUBCELLULAR LOCATION: Nucleus. Cytoplasm, perinuclear region. Note=Predominantly nuclear, is able to exit the nucleus in an RNA-dependent manner.			RNA cap binding [GO:0000339]	GO:0000184; GO:0000243; GO:0000339; GO:0000398; GO:0000956; GO:0005634; GO:0005845; GO:0005846; GO:0006406; GO:0006970; GO:0031053; GO:0031124; GO:0042789; GO:0045292; GO:0048471	FALSE	0
P25037	P25037	reviewed	UBP1_YEAST	Ubiquitin carboxyl-terminal hydrolase 1 (EC 3.4.19.12) (Deubiquitinating enzyme 1) (Ubiquitin thioesterase 1) (Ubiquitin-specific-processing protease 1)	UBP1 YDL122W D2250	Saccharomyces cerevisiae (strain ATCC 204508 / S288c) (Baker's yeast)	809	protein deubiquitination [GO:0016579]	cytoplasm [GO:0005737]; cytosol [GO:0005829]; endoplasmic reticulum [GO:0005783]; nucleus [GO:0005634]	cytoplasm [GO:0005737]; cytosol [GO:0005829]; endoplasmic reticulum [GO:0005783]; nucleus [GO:0005634]; cysteine-type deubiquitinase activity [GO:0004843]; protein deubiquitination [GO:0016579]				cysteine-type deubiquitinase activity [GO:0004843]	GO:0004843; GO:0005634; GO:0005737; GO:0005783; GO:0005829; GO:0016579	FALSE	0
P24279	P24279	reviewed	MCM3_YEAST	DNA replication licensing factor MCM3 (EC 3.6.4.12) (Minichromosome maintenance protein 3)	MCM3 YEL032W SYGP-ORF23	Saccharomyces cerevisiae (strain ATCC 204508 / S288c) (Baker's yeast)	971	DNA replication initiation [GO:0006270]; DNA strand elongation involved in DNA replication [GO:0006271]; DNA unwinding involved in DNA replication [GO:0006268]; double-strand break repair via break-induced replication [GO:0000727]; mitotic DNA replication initiation [GO:1902975]; pre-replicative complex assembly involved in nuclear cell cycle DNA replication [GO:0006267]; premeiotic DNA replicati…	chromosome, telomeric region [GO:0000781]; CMG complex [GO:0071162]; cytoplasm [GO:0005737]; DNA replication preinitiation complex [GO:0031261]; MCM complex [GO:0042555]; nuclear pre-replicative complex [GO:0005656]; nuclear replication fork [GO:0043596]; nucleoplasm [GO:0005654]; nucleus [GO:0005634]; replication fork protection complex [GO:0031298]	chromosome, telomeric region [GO:0000781]; CMG complex [GO:0071162]; cytoplasm [GO:0005737]; DNA replication preinitiation complex [GO:0031261]; MCM complex [GO:0042555]; nuclear pre-replicative complex [GO:0005656]; nuclear replication fork [GO:0043596]; nucleoplasm [GO:0005654]; nucleus [GO:0005634]; replication fork protection complex [GO:0031298]; ATP binding [GO:0005524]; ATP hydrolysis acti…	SUBCELLULAR LOCATION: Nucleus.			ATP binding [GO:0005524]; ATP hydrolysis activity [GO:0016887]; chromatin binding [GO:0003682]; DNA replication origin binding [GO:0003688]; helicase activity [GO:0004386]; MCM complex binding [GO:1904931]; single-stranded DNA binding [GO:0003697]	GO:0000727; GO:0000781; GO:0003682; GO:0003688; GO:0003697; GO:0004386; GO:0005524; GO:0005634; GO:0005654; GO:0005656; GO:0005737; GO:0006267; GO:0006268; GO:0006270; GO:0006271; GO:0006279; GO:0016887; GO:0030174; GO:0030466; GO:0031261; GO:0031298; GO:0031509; GO:0042555; GO:0043596; GO:0071162; GO:1902975; GO:1904931	FALSE	0
P32473	P32473	reviewed	ODPB_YEAST	Pyruvate dehydrogenase E1 component subunit beta, mitochondrial (EC 1.2.4.1) (Pyruvate dehydrogenase complex component E1 beta) (PDHE1-B)	PDB1 YBR221C YBR1511	Saccharomyces cerevisiae (strain ATCC 204508 / S288c) (Baker's yeast)	366	acetyl-CoA biosynthetic process from pyruvate [GO:0006086]; glycolytic process [GO:0006096]	mitochondrial nucleoid [GO:0042645]; mitochondrial pyruvate dehydrogenase complex [GO:0005967]; mitochondrion [GO:0005739]	mitochondrial nucleoid [GO:0042645]; mitochondrial pyruvate dehydrogenase complex [GO:0005967]; mitochondrion [GO:0005739]; pyruvate dehydrogenase (acetyl-transferring) activity [GO:0004739]; acetyl-CoA biosynthetic process from pyruvate [GO:0006086]; glycolytic process [GO:0006096]	SUBCELLULAR LOCATION: Mitochondrion matrix.			pyruvate dehydrogenase (acetyl-transferring) activity [GO:0004739]	GO:0004739; GO:0005739; GO:0005967; GO:0006086; GO:0006096; GO:0042645	FALSE	0
P47019	P47019	reviewed	ALB1_YEAST	Ribosome biogenesis protein ALB1	ALB1 YJL122W J0723	Saccharomyces cerevisiae (strain ATCC 204508 / S288c) (Baker's yeast)	175	ribosomal large subunit biogenesis [GO:0042273]	cytoplasm [GO:0005737]; nucleus [GO:0005634]	cytoplasm [GO:0005737]; nucleus [GO:0005634]; ribosomal large subunit biogenesis [GO:0042273]	SUBCELLULAR LOCATION: Cytoplasm. Nucleus.				GO:0005634; GO:0005737; GO:0042273	FALSE	0
Q03362	Q03362	reviewed	YD476_YEAST	Uncharacterized protein YDR476C	YDR476C	Saccharomyces cerevisiae (strain ATCC 204508 / S288c) (Baker's yeast)	224		endoplasmic reticulum [GO:0005783]	endoplasmic reticulum [GO:0005783]	SUBCELLULAR LOCATION: Endoplasmic reticulum {ECO:0000269|PubMed:14562095}.				GO:0005783	FALSE	0
P51401	P51401	reviewed	RL9B_YEAST	Large ribosomal subunit protein uL6B (60S ribosomal protein L9-B) (L8) (RP24) (YL11)	RPL9B RPL8B YNL067W N2406 YNL2406W	Saccharomyces cerevisiae (strain ATCC 204508 / S288c) (Baker's yeast)	191	cytoplasmic translation [GO:0002181]	cytosol [GO:0005829]; cytosolic large ribosomal subunit [GO:0022625]	cytosol [GO:0005829]; cytosolic large ribosomal subunit [GO:0022625]; rRNA binding [GO:0019843]; structural constituent of ribosome [GO:0003735]; cytoplasmic translation [GO:0002181]	SUBCELLULAR LOCATION: Cytoplasm {ECO:0000269|PubMed:14562095, ECO:0000269|PubMed:22096102}.			rRNA binding [GO:0019843]; structural constituent of ribosome [GO:0003735]	GO:0002181; GO:0003735; GO:0005829; GO:0019843; GO:0022625	FALSE	0
P0CF36	P0CF36	reviewed	YP276_YEAST	Putative uncharacterized protein YPL276W	YPL276W P0323	Saccharomyces cerevisiae (strain ATCC 204508 / S288c) (Baker's yeast)	145	formate catabolic process [GO:0042183]	cytosol [GO:0005829]	cytosol [GO:0005829]; formate dehydrogenase (NAD+) activity [GO:0008863]; NAD binding [GO:0051287]; oxidoreductase activity, acting on the CH-OH group of donors, NAD or NADP as acceptor [GO:0016616]; formate catabolic process [GO:0042183]				formate dehydrogenase (NAD+) activity [GO:0008863]; NAD binding [GO:0051287]; oxidoreductase activity, acting on the CH-OH group of donors, NAD or NADP as acceptor [GO:0016616]	GO:0005829; GO:0008863; GO:0016616; GO:0042183; GO:0051287	FALSE	0
P04806	P04806	reviewed	HXKA_YEAST	Hexokinase-1 (EC 2.7.1.1) (Hexokinase PI) (Hexokinase-A)	HXK1 HKA YFR053C	Saccharomyces cerevisiae (strain ATCC 204508 / S288c) (Baker's yeast)	485	carbohydrate phosphorylation [GO:0046835]; fructose import across plasma membrane [GO:1990539]; fructose metabolic process [GO:0006000]; glucose 6-phosphate metabolic process [GO:0051156]; glucose import [GO:0046323]; glucose metabolic process [GO:0006006]; glycolytic process [GO:0006096]; intracellular glucose homeostasis [GO:0001678]; mannose metabolic process [GO:0006013]	cytoplasm [GO:0005737]; cytosol [GO:0005829]; mitochondrion [GO:0005739]	cytoplasm [GO:0005737]; cytosol [GO:0005829]; mitochondrion [GO:0005739]; ATP binding [GO:0005524]; fructokinase activity [GO:0008865]; glucokinase activity [GO:0004340]; glucose binding [GO:0005536]; hexokinase activity [GO:0004396]; mannokinase activity [GO:0019158]; carbohydrate phosphorylation [GO:0046835]; fructose import across plasma membrane [GO:1990539]; fructose metabolic process [GO:00…				ATP binding [GO:0005524]; fructokinase activity [GO:0008865]; glucokinase activity [GO:0004340]; glucose binding [GO:0005536]; hexokinase activity [GO:0004396]; mannokinase activity [GO:0019158]	GO:0001678; GO:0004340; GO:0004396; GO:0005524; GO:0005536; GO:0005737; GO:0005739; GO:0005829; GO:0006000; GO:0006006; GO:0006013; GO:0006096; GO:0008865; GO:0019158; GO:0046323; GO:0046835; GO:0051156; GO:1990539	FALSE	0
Q02455	Q02455	reviewed	MLP1_YEAST	Protein MLP1 (Myosin-like protein 1)	MLP1 YKR095W YKR415	Saccharomyces cerevisiae (strain ATCC 204508 / S288c) (Baker's yeast)	1875	DNA repair [GO:0006281]; mRNA export from nucleus [GO:0006406]; negative regulation of protein import into nucleus during spindle assembly checkpoint [GO:1901925]; nuclear mRNA surveillance [GO:0071028]; nucleocytoplasmic transport [GO:0006913]; poly(A)+ mRNA export from nucleus [GO:0016973]; protein import into nucleus [GO:0006606]; protein localization to nuclear pore [GO:0090204]; telomere tet…	nuclear envelope [GO:0005635]; nuclear pore [GO:0005643]; nuclear pore nuclear basket [GO:0044615]; nucleoplasm [GO:0005654]	nuclear envelope [GO:0005635]; nuclear pore [GO:0005643]; nuclear pore nuclear basket [GO:0044615]; nucleoplasm [GO:0005654]; mRNA binding [GO:0003729]; promoter-terminator loop anchoring activity [GO:0140586]; ribonucleoprotein complex binding [GO:0043021]; structural constituent of nuclear pore [GO:0017056]; DNA repair [GO:0006281]; mRNA export from nucleus [GO:0006406]; negative regulation of …	SUBCELLULAR LOCATION: Nucleus {ECO:0000269|PubMed:14718167, ECO:0000269|PubMed:16027220}. Nucleus, nuclear pore complex {ECO:0000269|PubMed:24152732}. Note=Distributed fairly evenly along a C-shaped portion of the nuclear periphery, where the spindle pole body localizes in 90% of the cases. {ECO:0000269|PubMed:16027220}.			mRNA binding [GO:0003729]; promoter-terminator loop anchoring activity [GO:0140586]; ribonucleoprotein complex binding [GO:0043021]; structural constituent of nuclear pore [GO:0017056]	GO:0003729; GO:0005635; GO:0005643; GO:0005654; GO:0006281; GO:0006406; GO:0006606; GO:0006913; GO:0016973; GO:0017056; GO:0034398; GO:0043021; GO:0044615; GO:0071028; GO:0090204; GO:0140586; GO:1901925	FALSE	0
P24482	P24482	reviewed	DPB2_YEAST	DNA polymerase epsilon subunit B (DNA polymerase II subunit 2)	DPB2 YPR175W P9705.7	Saccharomyces cerevisiae (strain ATCC 204508 / S288c) (Baker's yeast)	689	cell cycle [GO:0007049]; DNA-templated DNA replication [GO:0006261]; DNA-templated DNA replication maintenance of fidelity [GO:0045005]; error-prone translesion synthesis [GO:0042276]	cytoplasm [GO:0005737]; epsilon DNA polymerase complex [GO:0008622]; nuclear replication fork [GO:0043596]; nucleus [GO:0005634]	cytoplasm [GO:0005737]; epsilon DNA polymerase complex [GO:0008622]; nuclear replication fork [GO:0043596]; nucleus [GO:0005634]; DNA binding [GO:0003677]; cell cycle [GO:0007049]; DNA-templated DNA replication [GO:0006261]; DNA-templated DNA replication maintenance of fidelity [GO:0045005]; error-prone translesion synthesis [GO:0042276]	SUBCELLULAR LOCATION: Cytoplasm {ECO:0000269|PubMed:14562095}. Nucleus {ECO:0000269|PubMed:14562095}.			DNA binding [GO:0003677]	GO:0003677; GO:0005634; GO:0005737; GO:0006261; GO:0007049; GO:0008622; GO:0042276; GO:0043596; GO:0045005	FALSE	0
P39965	P39965	reviewed	SYPM_YEAST	Probable proline--tRNA ligase, mitochondrial (EC 6.1.1.15) (Altered inheritance rate of mitochondria protein 10) (Prolyl-tRNA synthetase) (ProRS)	AIM10 YER087W	Saccharomyces cerevisiae (strain ATCC 204508 / S288c) (Baker's yeast)	576	prolyl-tRNA aminoacylation [GO:0006433]	mitochondrion [GO:0005739]	mitochondrion [GO:0005739]; ATP binding [GO:0005524]; proline-tRNA ligase activity [GO:0004827]; prolyl-tRNA aminoacylation [GO:0006433]	SUBCELLULAR LOCATION: Mitochondrion {ECO:0000269|PubMed:16823961}.			ATP binding [GO:0005524]; proline-tRNA ligase activity [GO:0004827]	GO:0004827; GO:0005524; GO:0005739; GO:0006433	FALSE	0
Q99315	Q99315	reviewed	YG31B_YEAST	Transposon Ty3-G Gag-Pol polyprotein (Gag3-Pol3) (Transposon Ty3-1 TYA-TYB polyprotein) [Cleaved into: Capsid protein (CA) (p24); Spacer peptide p3; Nucleocapsid protein p11 (NC); Ty3 protease (PR) (EC 3.4.23.-) (p16); Spacer peptide J; Reverse transcriptase/ribonuclease H (RT) (RT-RH) (EC 2.7.7.49) (EC 2.7.7.7) (EC 3.1.26.4) (p55); Integrase p61 (IN); Integrase p58 (IN)]	TY3B-G YGRWTy3-1 POL YGR109W-B G5984	Saccharomyces cerevisiae (strain ATCC 204508 / S288c) (Baker's yeast)	1547	DNA integration [GO:0015074]; DNA recombination [GO:0006310]; proteolysis [GO:0006508]; retrotransposition [GO:0032197]	cytoplasm [GO:0005737]; nucleus [GO:0005634]; retrotransposon nucleocapsid [GO:0000943]	cytoplasm [GO:0005737]; nucleus [GO:0005634]; retrotransposon nucleocapsid [GO:0000943]; aspartic-type endopeptidase activity [GO:0004190]; ATP binding [GO:0005524]; DNA binding [GO:0003677]; DNA-directed DNA polymerase activity [GO:0003887]; peptidase activity [GO:0008233]; RNA binding [GO:0003723]; RNA nuclease activity [GO:0004540]; RNA-directed DNA polymerase activity [GO:0003964]; RNA-DNA hy…	SUBCELLULAR LOCATION: Cytoplasm {ECO:0000269|PubMed:1371165}. Nucleus {ECO:0000269|PubMed:1371165}.			aspartic-type endopeptidase activity [GO:0004190]; ATP binding [GO:0005524]; DNA binding [GO:0003677]; DNA-directed DNA polymerase activity [GO:0003887]; peptidase activity [GO:0008233]; RNA binding [GO:0003723]; RNA nuclease activity [GO:0004540]; RNA-directed DNA polymerase activity [GO:0003964]; RNA-DNA hybrid ribonuclease activity [GO:0004523]; zinc ion binding [GO:0008270]	GO:0000943; GO:0003677; GO:0003723; GO:0003887; GO:0003964; GO:0004190; GO:0004523; GO:0004540; GO:0005524; GO:0005634; GO:0005737; GO:0006310; GO:0006508; GO:0008233; GO:0008270; GO:0015074; GO:0032197	FALSE	0
P32381	P32381	reviewed	ARP2_YEAST	Actin-related protein 2 (Actin-like protein ARP2) (Actin-like protein 2)	ARP2 ACT2 YDL029W D2778	Saccharomyces cerevisiae (strain ATCC 204508 / S288c) (Baker's yeast)	391	actin cortical patch organization [GO:0044396]; actin nucleation [GO:0045010]; Arp2/3 complex-mediated actin nucleation [GO:0034314]; ascospore wall assembly [GO:0030476]; cytoplasm to vacuole transport by the Cvt pathway [GO:0032258]; establishment of mitochondrion localization [GO:0051654]; mitochondrion inheritance [GO:0000001]	actin cortical patch [GO:0030479]; actin cytoskeleton [GO:0015629]; Arp2/3 protein complex [GO:0005885]	actin cortical patch [GO:0030479]; actin cytoskeleton [GO:0015629]; Arp2/3 protein complex [GO:0005885]; actin binding [GO:0003779]; ATP binding [GO:0005524]; ATP hydrolysis activity [GO:0016887]; actin cortical patch organization [GO:0044396]; actin nucleation [GO:0045010]; Arp2/3 complex-mediated actin nucleation [GO:0034314]; ascospore wall assembly [GO:0030476]; cytoplasm to vacuole transport…	SUBCELLULAR LOCATION: Cytoplasm, cytoskeleton, actin patch {ECO:0000269|PubMed:11248049, ECO:0000269|PubMed:9210376}.			actin binding [GO:0003779]; ATP binding [GO:0005524]; ATP hydrolysis activity [GO:0016887]	GO:0000001; GO:0003779; GO:0005524; GO:0005885; GO:0015629; GO:0016887; GO:0030476; GO:0030479; GO:0032258; GO:0034314; GO:0044396; GO:0045010; GO:0051654	FALSE	0
P32451	P32451	reviewed	BIOB_YEAST	Biotin synthase, mitochondrial (EC 2.8.1.6)	BIO2 YGR286C	Saccharomyces cerevisiae (strain ATCC 204508 / S288c) (Baker's yeast)	375	biotin biosynthetic process [GO:0009102]	mitochondrion [GO:0005739]	mitochondrion [GO:0005739]; 2 iron, 2 sulfur cluster binding [GO:0051537]; 4 iron, 4 sulfur cluster binding [GO:0051539]; biotin synthase activity [GO:0004076]; metal ion binding [GO:0046872]; biotin biosynthetic process [GO:0009102]	SUBCELLULAR LOCATION: Mitochondrion {ECO:0000269|PubMed:14562095}.			2 iron, 2 sulfur cluster binding [GO:0051537]; 4 iron, 4 sulfur cluster binding [GO:0051539]; biotin synthase activity [GO:0004076]; metal ion binding [GO:0046872]	GO:0004076; GO:0005739; GO:0009102; GO:0046872; GO:0051537; GO:0051539	FALSE	0
P53946	P53946	reviewed	ARP5_YEAST	Actin-related protein 5 (Actin-like protein ARP5)	ARP5 YNL059C N2430 YNL2430C	Saccharomyces cerevisiae (strain ATCC 204508 / S288c) (Baker's yeast)	755	chromatin remodeling [GO:0006338]; DNA repair [GO:0006281]; regulation of DNA-templated transcription [GO:0006355]	cytoplasm [GO:0005737]; Ino80 complex [GO:0031011]; nucleus [GO:0005634]	cytoplasm [GO:0005737]; Ino80 complex [GO:0031011]; nucleus [GO:0005634]; chromatin remodeling [GO:0006338]; DNA repair [GO:0006281]; regulation of DNA-templated transcription [GO:0006355]	SUBCELLULAR LOCATION: Nucleus.				GO:0005634; GO:0005737; GO:0006281; GO:0006338; GO:0006355; GO:0031011	FALSE	0
Q06091	Q06091	reviewed	SN309_YEAST	Pre-mRNA-splicing factor SNT309 (PRP19-associated complex protein 25) (Synergistic to PRP19 mutation protein 309)	SNT309 NTC25 YPR101W	Saccharomyces cerevisiae (strain ATCC 204508 / S288c) (Baker's yeast)	175	mRNA splicing, via spliceosome [GO:0000398]	Prp19 complex [GO:0000974]; U2-type catalytic step 1 spliceosome [GO:0071006]	Prp19 complex [GO:0000974]; U2-type catalytic step 1 spliceosome [GO:0071006]; mRNA splicing, via spliceosome [GO:0000398]	SUBCELLULAR LOCATION: Nucleus {ECO:0000269|PubMed:14562095}.				GO:0000398; GO:0000974; GO:0071006	FALSE	0
P05747	P05747	reviewed	RL29_YEAST	Large ribosomal subunit protein eL29 (60S ribosomal protein L29) (YL43)	RPL29 YL43 YFR032C-A YFR032BW	Saccharomyces cerevisiae (strain ATCC 204508 / S288c) (Baker's yeast)	59	cytoplasmic translation [GO:0002181]	cytoplasm [GO:0005737]; cytosol [GO:0005829]; cytosolic large ribosomal subunit [GO:0022625]	cytoplasm [GO:0005737]; cytosol [GO:0005829]; cytosolic large ribosomal subunit [GO:0022625]; structural constituent of ribosome [GO:0003735]; cytoplasmic translation [GO:0002181]	SUBCELLULAR LOCATION: Cytoplasm {ECO:0000269|PubMed:14562095, ECO:0000269|PubMed:22096102}.			structural constituent of ribosome [GO:0003735]	GO:0002181; GO:0003735; GO:0005737; GO:0005829; GO:0022625	FALSE	0
P25373	P25373	reviewed	GLRX1_YEAST	Glutaredoxin-1 (EC 1.11.1.9) (EC 2.5.1.18) (Glutathione-dependent oxidoreductase 1)	GRX1 YCL035C YCL35C	Saccharomyces cerevisiae (strain ATCC 204508 / S288c) (Baker's yeast)	110	cellular response to oxidative stress [GO:0034599]; protein glutathionylation [GO:0010731]	cytoplasm [GO:0005737]; nucleus [GO:0005634]	cytoplasm [GO:0005737]; nucleus [GO:0005634]; glutathione disulfide oxidoreductase activity [GO:0015038]; glutathione peroxidase activity [GO:0004602]; glutathione transferase activity [GO:0004364]; cellular response to oxidative stress [GO:0034599]; protein glutathionylation [GO:0010731]	SUBCELLULAR LOCATION: Cytoplasm {ECO:0000269|PubMed:14562095}. Nucleus {ECO:0000269|PubMed:14562095}.			glutathione disulfide oxidoreductase activity [GO:0015038]; glutathione peroxidase activity [GO:0004602]; glutathione transferase activity [GO:0004364]	GO:0004364; GO:0004602; GO:0005634; GO:0005737; GO:0010731; GO:0015038; GO:0034599	FALSE	0
P38254	P38254	reviewed	TTL_YEAST	Probable tubulin--tyrosine ligase PBY1 (EC 6.3.2.25) (P-body-associated protein 1)	PBY1 YBR094W YBR0821	Saccharomyces cerevisiae (strain ATCC 204508 / S288c) (Baker's yeast)	753	protein modification process [GO:0036211]	cytoplasm [GO:0005737]; P-body [GO:0000932]	cytoplasm [GO:0005737]; P-body [GO:0000932]; ATP binding [GO:0005524]; hydrolase activity [GO:0016787]; tubulin-tyrosine ligase activity [GO:0004835]; protein modification process [GO:0036211]	SUBCELLULAR LOCATION: Cytoplasm {ECO:0000269|PubMed:14562095}. Cytoplasm, P-body {ECO:0000269|PubMed:17307817}.			ATP binding [GO:0005524]; hydrolase activity [GO:0016787]; tubulin-tyrosine ligase activity [GO:0004835]	GO:0000932; GO:0004835; GO:0005524; GO:0005737; GO:0016787; GO:0036211	FALSE	0
P17076	P17076	reviewed	RL8A_YEAST	Large ribosomal subunit protein eL8A (60S ribosomal protein L8-A) (L4) (L4-2) (L7a-1) (Maintenance of killer protein 7) (RP6) (YL5)	RPL8A MAK7 RPL4A YHL033C	Saccharomyces cerevisiae (strain ATCC 204508 / S288c) (Baker's yeast)	256	cytoplasmic translation [GO:0002181]; maturation of LSU-rRNA [GO:0000470]	cytosol [GO:0005829]; cytosolic large ribosomal subunit [GO:0022625]	cytosol [GO:0005829]; cytosolic large ribosomal subunit [GO:0022625]; RNA binding [GO:0003723]; structural constituent of ribosome [GO:0003735]; cytoplasmic translation [GO:0002181]; maturation of LSU-rRNA [GO:0000470]	SUBCELLULAR LOCATION: Cytoplasm {ECO:0000269|PubMed:14562095, ECO:0000269|PubMed:22096102}.			RNA binding [GO:0003723]; structural constituent of ribosome [GO:0003735]	GO:0000470; GO:0002181; GO:0003723; GO:0003735; GO:0005829; GO:0022625	FALSE	0
P27472	P27472	reviewed	GYS2_YEAST	Glycogen [starch] synthase isoform 2 (EC 2.4.1.11)	GSY2 YLR258W L8479.8	Saccharomyces cerevisiae (strain ATCC 204508 / S288c) (Baker's yeast)	705	glycogen biosynthetic process [GO:0005978]	cytoplasm [GO:0005737]; nucleus [GO:0005634]	cytoplasm [GO:0005737]; nucleus [GO:0005634]; glycogen (starch) synthase activity [GO:0004373]; identical protein binding [GO:0042802]; molecular function inhibitor activity [GO:0140678]; glycogen biosynthetic process [GO:0005978]				glycogen (starch) synthase activity [GO:0004373]; identical protein binding [GO:0042802]; molecular function inhibitor activity [GO:0140678]	GO:0004373; GO:0005634; GO:0005737; GO:0005978; GO:0042802; GO:0140678	FALSE	0
Q12192	Q12192	reviewed	RFM1_YEAST	Repression factor of MSEs protein 1	RFM1 YOR279C	Saccharomyces cerevisiae (strain ATCC 204508 / S288c) (Baker's yeast)	310	negative regulation of transcription by RNA polymerase II [GO:0000122]; positive regulation of DNA-templated DNA replication initiation [GO:0032298]; regulation of DNA-templated DNA replication initiation [GO:0030174]; regulation of sporulation [GO:0043937]; regulation of transcription by RNA polymerase II [GO:0006357]	histone deacetylase complex [GO:0000118]	histone deacetylase complex [GO:0000118]; protein-macromolecule adaptor activity [GO:0030674]; negative regulation of transcription by RNA polymerase II [GO:0000122]; positive regulation of DNA-templated DNA replication initiation [GO:0032298]; regulation of DNA-templated DNA replication initiation [GO:0030174]; regulation of sporulation [GO:0043937]; regulation of transcription by RNA polymerase…	SUBCELLULAR LOCATION: Nucleus.			protein-macromolecule adaptor activity [GO:0030674]	GO:0000118; GO:0000122; GO:0006357; GO:0030174; GO:0030674; GO:0032298; GO:0043937	FALSE	0
Q02724	Q02724	reviewed	ULP1_YEAST	Ubiquitin-like-specific protease 1 (EC 3.4.22.68)	ULP1 YPL020C LPB11C	Saccharomyces cerevisiae (strain ATCC 204508 / S288c) (Baker's yeast)	621	G2/M transition of mitotic cell cycle [GO:0000086]; protein desumoylation [GO:0016926]	nuclear envelope [GO:0005635]; nucleolus [GO:0005730]; nucleus [GO:0005634]	nuclear envelope [GO:0005635]; nucleolus [GO:0005730]; nucleus [GO:0005634]; cysteine-type peptidase activity [GO:0008234]; deSUMOylase activity [GO:0016929]; protein-containing complex binding [GO:0044877]; G2/M transition of mitotic cell cycle [GO:0000086]; protein desumoylation [GO:0016926]				cysteine-type peptidase activity [GO:0008234]; deSUMOylase activity [GO:0016929]; protein-containing complex binding [GO:0044877]	GO:0000086; GO:0005634; GO:0005635; GO:0005730; GO:0008234; GO:0016926; GO:0016929; GO:0044877	FALSE	0
P00724	P00724	reviewed	INV2_YEAST	Invertase 2 (EC 3.2.1.26) (Beta-fructofuranosidase 2) (Saccharase)	SUC2 YIL162W	Saccharomyces cerevisiae (strain ATCC 204508 / S288c) (Baker's yeast)	532	fructan catabolic process [GO:0010147]; inulin catabolic process [GO:1902927]; raffinose catabolic process [GO:0034484]; sucrose catabolic process [GO:0005987]	cell periphery [GO:0071944]; cytoplasm [GO:0005737]; extracellular region [GO:0005576]; fungal-type vacuole [GO:0000324]; mitochondrion [GO:0005739]	cell periphery [GO:0071944]; cytoplasm [GO:0005737]; extracellular region [GO:0005576]; fungal-type vacuole [GO:0000324]; mitochondrion [GO:0005739]; beta-fructofuranosidase activity [GO:0004564]; inulinase activity [GO:0051670]; sucrose alpha-glucosidase activity [GO:0004575]; fructan catabolic process [GO:0010147]; inulin catabolic process [GO:1902927]; raffinose catabolic process [GO:0034484];…	SUBCELLULAR LOCATION: [Isoform Intracellular]: Cytoplasm.; SUBCELLULAR LOCATION: [Isoform Secreted]: Secreted.			beta-fructofuranosidase activity [GO:0004564]; inulinase activity [GO:0051670]; sucrose alpha-glucosidase activity [GO:0004575]	GO:0000324; GO:0004564; GO:0004575; GO:0005576; GO:0005737; GO:0005739; GO:0005987; GO:0010147; GO:0034484; GO:0051670; GO:0071944; GO:1902927	FALSE	0
P39081	P39081	reviewed	PCF11_YEAST	Protein PCF11 (protein 1 of CF I)	PCF11 YDR228C YD9934.13C	Saccharomyces cerevisiae (strain ATCC 204508 / S288c) (Baker's yeast)	626	mRNA polyadenylation [GO:0006378]; termination of RNA polymerase II transcription [GO:0006369]; termination of RNA polymerase II transcription, exosome-dependent [GO:0030847]; termination of RNA polymerase II transcription, poly(A)-coupled [GO:0030846]	cytoplasm [GO:0005737]; cytosol [GO:0005829]; mRNA cleavage factor complex [GO:0005849]; nucleus [GO:0005634]	cytoplasm [GO:0005737]; cytosol [GO:0005829]; mRNA cleavage factor complex [GO:0005849]; nucleus [GO:0005634]; mRNA binding [GO:0003729]; RNA polymerase II complex binding [GO:0000993]; mRNA polyadenylation [GO:0006378]; termination of RNA polymerase II transcription [GO:0006369]; termination of RNA polymerase II transcription, exosome-dependent [GO:0030847]; termination of RNA polymerase II tran…	SUBCELLULAR LOCATION: Nucleus {ECO:0000305}.			mRNA binding [GO:0003729]; RNA polymerase II complex binding [GO:0000993]	GO:0000993; GO:0003729; GO:0005634; GO:0005737; GO:0005829; GO:0005849; GO:0006369; GO:0006378; GO:0030846; GO:0030847	FALSE	0
P17119	P17119	reviewed	KAR3_YEAST	Kinesin-like protein KAR3 (Nuclear fusion protein)	KAR3 YPR141C P9659.16	Saccharomyces cerevisiae (strain ATCC 204508 / S288c) (Baker's yeast)	729	cell division [GO:0051301]; karyogamy involved in conjugation with cellular fusion [GO:0000742]; meiotic cell cycle [GO:0051321]; mitotic cell cycle [GO:0000278]; mitotic sister chromatid cohesion [GO:0007064]; nuclear migration involved in conjugation with cellular fusion [GO:0000743]; regulation of mitotic spindle organization [GO:0060236]	cytoplasmic microtubule [GO:0005881]; microtubule [GO:0005874]; nucleus [GO:0005634]; spindle pole [GO:0000922]; spindle pole body [GO:0005816]	cytoplasmic microtubule [GO:0005881]; microtubule [GO:0005874]; nucleus [GO:0005634]; spindle pole [GO:0000922]; spindle pole body [GO:0005816]; ATP binding [GO:0005524]; microtubule binding [GO:0008017]; minus-end-directed microtubule motor activity [GO:0008569]; cell division [GO:0051301]; karyogamy involved in conjugation with cellular fusion [GO:0000742]; meiotic cell cycle [GO:0051321]; mito…	SUBCELLULAR LOCATION: Cytoplasm, cytoskeleton, microtubule organizing center, spindle pole body. Nucleus. Cytoplasm, cytoskeleton. Note=Cytoplasmic microtubules.			ATP binding [GO:0005524]; microtubule binding [GO:0008017]; minus-end-directed microtubule motor activity [GO:0008569]	GO:0000278; GO:0000742; GO:0000743; GO:0000922; GO:0005524; GO:0005634; GO:0005816; GO:0005874; GO:0005881; GO:0007064; GO:0008017; GO:0008569; GO:0051301; GO:0051321; GO:0060236	FALSE	0
P53256	P53256	reviewed	RRP46_YEAST	Exosome complex component RRP46 (Ribosomal RNA-processing protein 46)	RRP46 YGR095C	Saccharomyces cerevisiae (strain ATCC 204508 / S288c) (Baker's yeast)	223	exonucleolytic trimming to generate mature 3'-end of 5.8S rRNA from tricistronic rRNA transcript (SSU-rRNA, 5.8S rRNA, LSU-rRNA) [GO:0000467]; nonfunctional rRNA decay [GO:0070651]; nuclear mRNA surveillance [GO:0071028]; nuclear polyadenylation-dependent mRNA catabolic process [GO:0071042]; nuclear polyadenylation-dependent rRNA catabolic process [GO:0071035]; nuclear polyadenylation-dependent t…	cytoplasmic exosome (RNase complex) [GO:0000177]; exosome (RNase complex) [GO:0000178]; nuclear exosome (RNase complex) [GO:0000176]; nucleolus [GO:0005730]; nucleus [GO:0005634]	cytoplasmic exosome (RNase complex) [GO:0000177]; exosome (RNase complex) [GO:0000178]; nuclear exosome (RNase complex) [GO:0000176]; nucleolus [GO:0005730]; nucleus [GO:0005634]; RNA binding [GO:0003723]; exonucleolytic trimming to generate mature 3'-end of 5.8S rRNA from tricistronic rRNA transcript (SSU-rRNA, 5.8S rRNA, LSU-rRNA) [GO:0000467]; nonfunctional rRNA decay [GO:0070651]; nuclear mRN…	SUBCELLULAR LOCATION: Cytoplasm {ECO:0000269|PubMed:14562095}. Nucleus, nucleolus {ECO:0000269|PubMed:14562095}.			RNA binding [GO:0003723]	GO:0000176; GO:0000177; GO:0000178; GO:0000467; GO:0003723; GO:0005634; GO:0005730; GO:0006396; GO:0006401; GO:0016075; GO:0034427; GO:0034475; GO:0070478; GO:0070481; GO:0070651; GO:0071028; GO:0071035; GO:0071038; GO:0071042; GO:0071051	FALSE	0
P38920	P38920	reviewed	MLH1_YEAST	DNA mismatch repair protein MLH1 (MutL protein homolog 1) (Post meiotic segregation protein 2)	MLH1 PMS2 YMR167W YM8520.16	Saccharomyces cerevisiae (strain ATCC 204508 / S288c) (Baker's yeast)	769	meiotic heteroduplex formation [GO:0000713]; meiotic mismatch repair [GO:0000710]; mismatch repair [GO:0006298]; reciprocal meiotic recombination [GO:0007131]	cytoplasm [GO:0005737]; mitochondrion [GO:0005739]; MutLalpha complex [GO:0032389]; MutLbeta complex [GO:0032390]; MutLgamma complex [GO:0097587]; nucleus [GO:0005634]	cytoplasm [GO:0005737]; mitochondrion [GO:0005739]; MutLalpha complex [GO:0032389]; MutLbeta complex [GO:0032390]; MutLgamma complex [GO:0097587]; nucleus [GO:0005634]; ATP binding [GO:0005524]; ATP hydrolysis activity [GO:0016887]; ATP-dependent DNA damage sensor activity [GO:0140664]; mismatched DNA binding [GO:0030983]; meiotic heteroduplex formation [GO:0000713]; meiotic mismatch repair [GO:0…	SUBCELLULAR LOCATION: Nucleus {ECO:0000269|PubMed:14562095}.			ATP binding [GO:0005524]; ATP hydrolysis activity [GO:0016887]; ATP-dependent DNA damage sensor activity [GO:0140664]; mismatched DNA binding [GO:0030983]	GO:0000710; GO:0000713; GO:0005524; GO:0005634; GO:0005737; GO:0005739; GO:0006298; GO:0007131; GO:0016887; GO:0030983; GO:0032389; GO:0032390; GO:0097587; GO:0140664	FALSE	0
Q6Q547	Q6Q547	reviewed	NOP10_YEAST	H/ACA ribonucleoprotein complex subunit NOP10 (Nucleolar protein 10) (Nucleolar protein family A member 3) (snoRNP protein NOP10)	NOP10 YHR072W-A	Saccharomyces cerevisiae (strain ATCC 204508 / S288c) (Baker's yeast)	58	rRNA processing [GO:0006364]; rRNA pseudouridine synthesis [GO:0031118]; snoRNA guided rRNA pseudouridine synthesis [GO:0000454]; snRNA pseudouridine synthesis [GO:0031120]	box H/ACA snoRNP complex [GO:0031429]; nucleolus [GO:0005730]; sno(s)RNA-containing ribonucleoprotein complex [GO:0005732]	box H/ACA snoRNP complex [GO:0031429]; nucleolus [GO:0005730]; sno(s)RNA-containing ribonucleoprotein complex [GO:0005732]; RNA binding [GO:0003723]; snoRNA binding [GO:0030515]; telomerase RNA binding [GO:0070034]; rRNA processing [GO:0006364]; rRNA pseudouridine synthesis [GO:0031118]; snoRNA guided rRNA pseudouridine synthesis [GO:0000454]; snRNA pseudouridine synthesis [GO:0031120]	SUBCELLULAR LOCATION: Nucleus, nucleolus {ECO:0000269|PubMed:14562095, ECO:0000269|PubMed:9843512}.			RNA binding [GO:0003723]; snoRNA binding [GO:0030515]; telomerase RNA binding [GO:0070034]	GO:0000454; GO:0003723; GO:0005730; GO:0005732; GO:0006364; GO:0030515; GO:0031118; GO:0031120; GO:0031429; GO:0070034	FALSE	0
P05373	P05373	reviewed	HEM2_YEAST	Delta-aminolevulinic acid dehydratase (ALADH) (EC 4.2.1.24) (Porphobilinogen synthase)	HEM2 YGL040C	Saccharomyces cerevisiae (strain ATCC 204508 / S288c) (Baker's yeast)	342	heme biosynthetic process [GO:0006783]; protoporphyrinogen IX biosynthetic process [GO:0006782]	cytoplasm [GO:0005737]; cytosol [GO:0005829]; nucleus [GO:0005634]	cytoplasm [GO:0005737]; cytosol [GO:0005829]; nucleus [GO:0005634]; porphobilinogen synthase activity [GO:0004655]; zinc ion binding [GO:0008270]; heme biosynthetic process [GO:0006783]; protoporphyrinogen IX biosynthetic process [GO:0006782]				porphobilinogen synthase activity [GO:0004655]; zinc ion binding [GO:0008270]	GO:0004655; GO:0005634; GO:0005737; GO:0005829; GO:0006782; GO:0006783; GO:0008270	FALSE	0
P32491	P32491	reviewed	MKK2_YEAST	MAP kinase kinase MKK2/SSP33 (EC 2.7.12.2)	MKK2 SSP33 YPL140C LPI6C	Saccharomyces cerevisiae (strain ATCC 204508 / S288c) (Baker's yeast)	506	autophagy of peroxisome [GO:0030242]; cell wall integrity MAPK cascade [GO:0000196]; phosphorylation [GO:0016310]; regulation of fungal-type cell wall organization [GO:0060237]; signal transduction [GO:0007165]	cellular bud neck [GO:0005935]; cellular bud tip [GO:0005934]; cytoplasm [GO:0005737]; cytosol [GO:0005829]; mating projection tip [GO:0043332]	cellular bud neck [GO:0005935]; cellular bud tip [GO:0005934]; cytoplasm [GO:0005737]; cytosol [GO:0005829]; mating projection tip [GO:0043332]; ATP binding [GO:0005524]; MAP kinase kinase activity [GO:0004708]; protein serine kinase activity [GO:0106310]; protein serine/threonine kinase activity [GO:0004674]; protein tyrosine kinase activity [GO:0004713]; autophagy of peroxisome [GO:0030242]; ce…				ATP binding [GO:0005524]; MAP kinase kinase activity [GO:0004708]; protein serine kinase activity [GO:0106310]; protein serine/threonine kinase activity [GO:0004674]; protein tyrosine kinase activity [GO:0004713]	GO:0000196; GO:0004674; GO:0004708; GO:0004713; GO:0005524; GO:0005737; GO:0005829; GO:0005934; GO:0005935; GO:0007165; GO:0016310; GO:0030242; GO:0043332; GO:0060237; GO:0106310	FALSE	0
P32769	P32769	reviewed	HBS1_YEAST	Elongation factor 1 alpha-like protein (EC 3.6.5.-)	HBS1 YKR084C YKR404	Saccharomyces cerevisiae (strain ATCC 204508 / S288c) (Baker's yeast)	611	nonfunctional rRNA decay [GO:0070651]; nuclear-transcribed mRNA catabolic process, no-go decay [GO:0070966]; positive regulation of translation [GO:0045727]; positive regulation of translational initiation [GO:0045948]; rescue of stalled ribosome [GO:0072344]; ribosome disassembly [GO:0032790]; translation [GO:0006412]	cytoplasm [GO:0005737]; cytosol [GO:0005829]; Dom34-Hbs1 complex [GO:1990533]	cytoplasm [GO:0005737]; cytosol [GO:0005829]; Dom34-Hbs1 complex [GO:1990533]; GTP binding [GO:0005525]; GTPase activity [GO:0003924]; translation elongation factor activity [GO:0003746]; nonfunctional rRNA decay [GO:0070651]; nuclear-transcribed mRNA catabolic process, no-go decay [GO:0070966]; positive regulation of translation [GO:0045727]; positive regulation of translational initiation [GO:0…	SUBCELLULAR LOCATION: Cytoplasm {ECO:0000269|PubMed:14562095}.			GTP binding [GO:0005525]; GTPase activity [GO:0003924]; translation elongation factor activity [GO:0003746]	GO:0003746; GO:0003924; GO:0005525; GO:0005737; GO:0005829; GO:0006412; GO:0032790; GO:0045727; GO:0045948; GO:0070651; GO:0070966; GO:0072344; GO:1990533	FALSE	0
Q03649	Q03649	reviewed	MGL2_YEAST	Monoacylglycerol lipase (MAG lipase) (EC 3.1.1.23)	MGL2 YMR210W YM8261.04	Saccharomyces cerevisiae (strain ATCC 204508 / S288c) (Baker's yeast)	449	medium-chain fatty acid biosynthetic process [GO:0051792]; medium-chain fatty acid catabolic process [GO:0051793]; triglyceride metabolic process [GO:0006641]		acetylesterase activity [GO:0008126]; acylglycerol lipase activity [GO:0047372]; acyltransferase activity [GO:0016746]; triglyceride lipase activity [GO:0004806]; medium-chain fatty acid biosynthetic process [GO:0051792]; medium-chain fatty acid catabolic process [GO:0051793]; triglyceride metabolic process [GO:0006641]				acetylesterase activity [GO:0008126]; acylglycerol lipase activity [GO:0047372]; acyltransferase activity [GO:0016746]; triglyceride lipase activity [GO:0004806]	GO:0004806; GO:0006641; GO:0008126; GO:0016746; GO:0047372; GO:0051792; GO:0051793	FALSE	0
P36036	P36036	reviewed	YRA2_YEAST	RNA annealing protein YRA2	YRA2 YKL214C	Saccharomyces cerevisiae (strain ATCC 204508 / S288c) (Baker's yeast)	203	poly(A)+ mRNA export from nucleus [GO:0016973]	cytoplasm [GO:0005737]; nucleus [GO:0005634]; ribonucleoprotein complex [GO:1990904]	cytoplasm [GO:0005737]; nucleus [GO:0005634]; ribonucleoprotein complex [GO:1990904]; DNA binding [GO:0003677]; mRNA binding [GO:0003729]; RNA binding [GO:0003723]; poly(A)+ mRNA export from nucleus [GO:0016973]	SUBCELLULAR LOCATION: Nucleus {ECO:0000269|PubMed:11390651}.			DNA binding [GO:0003677]; mRNA binding [GO:0003729]; RNA binding [GO:0003723]	GO:0003677; GO:0003723; GO:0003729; GO:0005634; GO:0005737; GO:0016973; GO:1990904	FALSE	0
P38821	P38821	reviewed	DNPEP_YEAST	Aspartyl aminopeptidase 4 (EC 3.4.11.21)	APE4 YHR113W	Saccharomyces cerevisiae (strain ATCC 204508 / S288c) (Baker's yeast)	490	proteolysis [GO:0006508]	cytoplasm [GO:0005737]; fungal-type vacuole [GO:0000324]; fungal-type vacuole lumen [GO:0000328]	cytoplasm [GO:0005737]; fungal-type vacuole [GO:0000324]; fungal-type vacuole lumen [GO:0000328]; aminopeptidase activity [GO:0004177]; metalloaminopeptidase activity [GO:0070006]; zinc ion binding [GO:0008270]; proteolysis [GO:0006508]	SUBCELLULAR LOCATION: Cytoplasm {ECO:0000269|PubMed:21343297}. Vacuole lumen {ECO:0000269|PubMed:17651441, ECO:0000269|PubMed:21343297}. Note=In growing conditions, a small portion localizes in the vacuole, but actively transported to the vacuole under nutrient starvation conditions. {ECO:0000269|PubMed:21343297}.			aminopeptidase activity [GO:0004177]; metalloaminopeptidase activity [GO:0070006]; zinc ion binding [GO:0008270]	GO:0000324; GO:0000328; GO:0004177; GO:0005737; GO:0006508; GO:0008270; GO:0070006	FALSE	0
P20967	P20967	reviewed	ODO1_YEAST	2-oxoglutarate dehydrogenase, mitochondrial (OGDH) (EC 1.2.4.2) (2-oxoglutarate dehydrogenase complex component E1) (OGDC-E1) (OGDHC subunit E1) (Alpha-ketoglutarate dehydrogenase complex subunit E1) (alpha-KGDHC subunit E1)	KGD1 OGD1 YIL125W	Saccharomyces cerevisiae (strain ATCC 204508 / S288c) (Baker's yeast)	1014	2-oxoglutarate metabolic process [GO:0006103]; tricarboxylic acid cycle [GO:0006099]	mitochondrial alpha-ketoglutarate dehydrogenase complex [GO:0005947]; mitochondrial nucleoid [GO:0042645]; mitochondrial oxoglutarate dehydrogenase complex [GO:0009353]; mitochondrion [GO:0005739]; oxoglutarate dehydrogenase complex [GO:0045252]	mitochondrial alpha-ketoglutarate dehydrogenase complex [GO:0005947]; mitochondrial nucleoid [GO:0042645]; mitochondrial oxoglutarate dehydrogenase complex [GO:0009353]; mitochondrion [GO:0005739]; oxoglutarate dehydrogenase complex [GO:0045252]; oxoglutarate dehydrogenase (succinyl-transferring) activity [GO:0004591]; thiamine pyrophosphate binding [GO:0030976]; 2-oxoglutarate metabolic process …	SUBCELLULAR LOCATION: Mitochondrion {ECO:0000269|PubMed:25165143}. Mitochondrion matrix. Mitochondrion matrix, mitochondrion nucleoid.			oxoglutarate dehydrogenase (succinyl-transferring) activity [GO:0004591]; thiamine pyrophosphate binding [GO:0030976]	GO:0004591; GO:0005739; GO:0005947; GO:0006099; GO:0006103; GO:0009353; GO:0030976; GO:0042645; GO:0045252	FALSE	0
P32349	P32349	reviewed	RPC3_YEAST	DNA-directed RNA polymerase III subunit RPC3 (RNA polymerase III subunit C3) (C82) (DNA-directed III 74 kDa polypeptide) (C74)	RPC82 RPC3 YPR190C P9677.11	Saccharomyces cerevisiae (strain ATCC 204508 / S288c) (Baker's yeast)	654	termination of RNA polymerase III transcription [GO:0006386]; transcription by RNA polymerase III [GO:0006383]; transcription initiation at RNA polymerase III promoter [GO:0006384]; tRNA transcription by RNA polymerase III [GO:0042797]	cytoplasm [GO:0005737]; nucleoplasm [GO:0005654]; nucleus [GO:0005634]; RNA polymerase III complex [GO:0005666]	cytoplasm [GO:0005737]; nucleoplasm [GO:0005654]; nucleus [GO:0005634]; RNA polymerase III complex [GO:0005666]; single-stranded DNA binding [GO:0003697]; termination of RNA polymerase III transcription [GO:0006386]; transcription by RNA polymerase III [GO:0006383]; transcription initiation at RNA polymerase III promoter [GO:0006384]; tRNA transcription by RNA polymerase III [GO:0042797]	SUBCELLULAR LOCATION: Cytoplasm {ECO:0000269|PubMed:14562095}. Nucleus {ECO:0000269|PubMed:14562095}.			single-stranded DNA binding [GO:0003697]	GO:0003697; GO:0005634; GO:0005654; GO:0005666; GO:0005737; GO:0006383; GO:0006384; GO:0006386; GO:0042797	FALSE	0
Q04049	Q04049	reviewed	POLH_YEAST	DNA polymerase eta (EC 2.7.7.7) (Radiation-sensitive protein 30)	RAD30 DBH1 YDR419W	Saccharomyces cerevisiae (strain ATCC 204508 / S288c) (Baker's yeast)	632	chromosome segregation [GO:0007059]; DNA replication [GO:0006260]; error-free translesion synthesis [GO:0070987]; error-prone translesion synthesis [GO:0042276]; mitotic sister chromatid cohesion [GO:0007064]; response to radiation [GO:0009314]	mitochondrion [GO:0005739]; nucleus [GO:0005634]; replication fork [GO:0005657]; site of double-strand break [GO:0035861]	mitochondrion [GO:0005739]; nucleus [GO:0005634]; replication fork [GO:0005657]; site of double-strand break [GO:0035861]; damaged DNA binding [GO:0003684]; DNA-directed DNA polymerase activity [GO:0003887]; metal ion binding [GO:0046872]; chromosome segregation [GO:0007059]; DNA replication [GO:0006260]; error-free translesion synthesis [GO:0070987]; error-prone translesion synthesis [GO:0042276…	SUBCELLULAR LOCATION: Nucleus {ECO:0000269|PubMed:14562095}.			damaged DNA binding [GO:0003684]; DNA-directed DNA polymerase activity [GO:0003887]; metal ion binding [GO:0046872]	GO:0003684; GO:0003887; GO:0005634; GO:0005657; GO:0005739; GO:0006260; GO:0007059; GO:0007064; GO:0009314; GO:0035861; GO:0042276; GO:0046872; GO:0070987	FALSE	0
P46963	P46963	reviewed	CTK3_YEAST	CTD kinase subunit gamma (CTDK-I gamma subunit) (CTD kinase 32 kDa subunit) (CTD kinase subunit 3)	CTK3 YML112W YM8339.07	Saccharomyces cerevisiae (strain ATCC 204508 / S288c) (Baker's yeast)	296	DNA damage response [GO:0006974]; mRNA 3'-end processing [GO:0031124]; positive regulation of DNA-templated transcription, elongation [GO:0032786]; positive regulation of transcription by RNA polymerase I [GO:0045943]; positive regulation of transcription by RNA polymerase II [GO:0045944]; positive regulation of translational fidelity [GO:0045903]	carboxy-terminal domain protein kinase complex [GO:0032806]; CTDK-1 complex [GO:0070692]; cytoplasm [GO:0005737]; nucleolus [GO:0005730]; nucleoplasm [GO:0005654]	carboxy-terminal domain protein kinase complex [GO:0032806]; CTDK-1 complex [GO:0070692]; cytoplasm [GO:0005737]; nucleolus [GO:0005730]; nucleoplasm [GO:0005654]; DNA damage response [GO:0006974]; mRNA 3'-end processing [GO:0031124]; positive regulation of DNA-templated transcription, elongation [GO:0032786]; positive regulation of transcription by RNA polymerase I [GO:0045943]; positive regulat…	SUBCELLULAR LOCATION: Nucleus, nucleolus. Cytoplasm.				GO:0005654; GO:0005730; GO:0005737; GO:0006974; GO:0031124; GO:0032786; GO:0032806; GO:0045903; GO:0045943; GO:0045944; GO:0070692	FALSE	0
P47037	P47037	reviewed	SMC3_YEAST	Structural maintenance of chromosomes protein 3 (DA-box protein SMC3)	SMC3 YJL074C J1049	Saccharomyces cerevisiae (strain ATCC 204508 / S288c) (Baker's yeast)	1230	cell division [GO:0051301]; establishment of meiotic sister chromatid cohesion [GO:0034089]; establishment of mitotic sister chromatid cohesion [GO:0034087]; meiotic sister chromatid cohesion [GO:0051177]; mitotic sister chromatid cohesion [GO:0007064]; reciprocal meiotic recombination [GO:0007131]; replication-born double-strand break repair via sister chromatid exchange [GO:1990414]; synaptonem…	meiotic cohesin complex [GO:0030893]; mitotic cohesin complex [GO:0030892]; nucleus [GO:0005634]	meiotic cohesin complex [GO:0030893]; mitotic cohesin complex [GO:0030892]; nucleus [GO:0005634]; ATP binding [GO:0005524]; ATP hydrolysis activity [GO:0016887]; cohesin loader activity [GO:0061775]; double-stranded DNA binding [GO:0003690]; identical protein binding [GO:0042802]; protein kinase binding [GO:0019901]; cell division [GO:0051301]; establishment of meiotic sister chromatid cohesion […	SUBCELLULAR LOCATION: Nucleus. Chromosome. Note=Associates with chromatin. Before prophase it is scattered along chromosome arms. At anaphase, the MCD1 subunit of the cohesin complex is cleaved, leading to the dissociation of the complex from chromosomes, allowing chromosome separation.			ATP binding [GO:0005524]; ATP hydrolysis activity [GO:0016887]; cohesin loader activity [GO:0061775]; double-stranded DNA binding [GO:0003690]; identical protein binding [GO:0042802]; protein kinase binding [GO:0019901]	GO:0003690; GO:0005524; GO:0005634; GO:0007064; GO:0007130; GO:0007131; GO:0016887; GO:0019901; GO:0030892; GO:0030893; GO:0034087; GO:0034089; GO:0042802; GO:0051177; GO:0051301; GO:0061775; GO:1990414	FALSE	0
P53172	P53172	reviewed	SDS23_YEAST	Protein SDS23	SDS23 YGL056C	Saccharomyces cerevisiae (strain ATCC 204508 / S288c) (Baker's yeast)	527	cellular response to glucose starvation [GO:0042149]; regulation of mitotic metaphase/anaphase transition [GO:0030071]; septum digestion after cytokinesis [GO:0000920]	cytoplasm [GO:0005737]; nucleus [GO:0005634]	cytoplasm [GO:0005737]; nucleus [GO:0005634]; protein serine/threonine phosphatase inhibitor activity [GO:0004865]; cellular response to glucose starvation [GO:0042149]; regulation of mitotic metaphase/anaphase transition [GO:0030071]; septum digestion after cytokinesis [GO:0000920]	SUBCELLULAR LOCATION: Cytoplasm {ECO:0000269|PubMed:14562095}. Nucleus {ECO:0000269|PubMed:14562095}.			protein serine/threonine phosphatase inhibitor activity [GO:0004865]	GO:0000920; GO:0004865; GO:0005634; GO:0005737; GO:0030071; GO:0042149	FALSE	0
Q12272	Q12272	reviewed	TPT1_YEAST	tRNA 2'-phosphotransferase (EC 2.7.1.160)	TPT1 YOL102C HRE230	Saccharomyces cerevisiae (strain ATCC 204508 / S288c) (Baker's yeast)	230	tRNA splicing, via endonucleolytic cleavage and ligation [GO:0006388]	cytoplasm [GO:0005737]; nucleus [GO:0005634]	cytoplasm [GO:0005737]; nucleus [GO:0005634]; tRNA 2'-phosphotransferase activity [GO:0000215]; tRNA splicing, via endonucleolytic cleavage and ligation [GO:0006388]				tRNA 2'-phosphotransferase activity [GO:0000215]	GO:0000215; GO:0005634; GO:0005737; GO:0006388	FALSE	0
P39955	P39955	reviewed	SAP1_YEAST	Protein SAP1 (SIN1-associated protein)	SAP1 YER047C	Saccharomyces cerevisiae (strain ATCC 204508 / S288c) (Baker's yeast)	897		cytoplasm [GO:0005737]	cytoplasm [GO:0005737]; ATP binding [GO:0005524]; ATP hydrolysis activity [GO:0016887]				ATP binding [GO:0005524]; ATP hydrolysis activity [GO:0016887]	GO:0005524; GO:0005737; GO:0016887	FALSE	0
Q08689	Q08689	reviewed	NAT5_YEAST	N-alpha-acetyltransferase NAT5 (NatA complex subunit NAT5) (EC 2.3.1.258)	NAT5 YOR253W	Saccharomyces cerevisiae (strain ATCC 204508 / S288c) (Baker's yeast)	176	mitotic sister chromatid cohesion [GO:0007064]; N-terminal protein amino acid acetylation [GO:0006474]	NatA complex [GO:0031415]	NatA complex [GO:0031415]; peptide alpha-N-acetyltransferase activity [GO:0004596]; mitotic sister chromatid cohesion [GO:0007064]; N-terminal protein amino acid acetylation [GO:0006474]	SUBCELLULAR LOCATION: Cytoplasm {ECO:0000269|PubMed:14562095}.			peptide alpha-N-acetyltransferase activity [GO:0004596]	GO:0004596; GO:0006474; GO:0007064; GO:0031415	FALSE	0
P32477	P32477	reviewed	GSH1_YEAST	Glutamate--cysteine ligase (EC 6.3.2.2) (Gamma-ECS) (GCS) (Gamma-glutamylcysteine synthetase)	GSH1 YJL101C J0832	Saccharomyces cerevisiae (strain ATCC 204508 / S288c) (Baker's yeast)	678	glutathione biosynthetic process [GO:0006750]; response to cadmium ion [GO:0046686]; response to hydrogen peroxide [GO:0042542]	cytoplasm [GO:0005737]	cytoplasm [GO:0005737]; ATP binding [GO:0005524]; glutamate-cysteine ligase activity [GO:0004357]; glutathione biosynthetic process [GO:0006750]; response to cadmium ion [GO:0046686]; response to hydrogen peroxide [GO:0042542]				ATP binding [GO:0005524]; glutamate-cysteine ligase activity [GO:0004357]	GO:0004357; GO:0005524; GO:0005737; GO:0006750; GO:0042542; GO:0046686	FALSE	0
P16451	P16451	reviewed	ODPX_YEAST	Pyruvate dehydrogenase complex protein X component, mitochondrial (Dihydrolipoamide dehydrogenase-binding protein of pyruvate dehydrogenase complex) (E3-binding protein) (Pyruvate dehydrogenase complex component E3BP)	PDX1 YGR193C G7579	Saccharomyces cerevisiae (strain ATCC 204508 / S288c) (Baker's yeast)	410	acetyl-CoA biosynthetic process from pyruvate [GO:0006086]	mitochondrial pyruvate dehydrogenase complex [GO:0005967]; mitochondrion [GO:0005739]	mitochondrial pyruvate dehydrogenase complex [GO:0005967]; mitochondrion [GO:0005739]; dihydrolipoyllysine-residue acetyltransferase activity [GO:0004742]; structural molecule activity [GO:0005198]; acetyl-CoA biosynthetic process from pyruvate [GO:0006086]	SUBCELLULAR LOCATION: Mitochondrion matrix.			dihydrolipoyllysine-residue acetyltransferase activity [GO:0004742]; structural molecule activity [GO:0005198]	GO:0004742; GO:0005198; GO:0005739; GO:0005967; GO:0006086	FALSE	0
P13382	P13382	reviewed	DPOLA_YEAST	DNA polymerase alpha catalytic subunit A (EC 2.7.7.7) (DNA polymerase I subunit A) (DNA polymerase alpha:primase complex p180 subunit) (DNA polymerase-primase complex p180 subunit) (Pol alpha-primase complex p180 subunit)	POL1 CDC17 YNL102W N2181	Saccharomyces cerevisiae (strain ATCC 204508 / S288c) (Baker's yeast)	1468	DNA replication [GO:0006260]; DNA replication initiation [GO:0006270]; DNA synthesis involved in DNA repair [GO:0000731]; double-strand break repair [GO:0006302]; lagging strand elongation [GO:0006273]; leading strand elongation [GO:0006272]; mitotic DNA replication initiation [GO:1902975]; premeiotic DNA replication [GO:0006279]; RNA-templated DNA biosynthetic process [GO:0006278]	alpha DNA polymerase:primase complex [GO:0005658]; mitochondrion [GO:0005739]; replication fork [GO:0005657]	alpha DNA polymerase:primase complex [GO:0005658]; mitochondrion [GO:0005739]; replication fork [GO:0005657]; 4 iron, 4 sulfur cluster binding [GO:0051539]; chromatin binding [GO:0003682]; DNA replication origin binding [GO:0003688]; DNA-directed DNA polymerase activity [GO:0003887]; metal ion binding [GO:0046872]; nucleotide binding [GO:0000166]; single-stranded DNA binding [GO:0003697]; DNA rep…	SUBCELLULAR LOCATION: Nucleus.			4 iron, 4 sulfur cluster binding [GO:0051539]; chromatin binding [GO:0003682]; DNA replication origin binding [GO:0003688]; DNA-directed DNA polymerase activity [GO:0003887]; metal ion binding [GO:0046872]; nucleotide binding [GO:0000166]; single-stranded DNA binding [GO:0003697]	GO:0000166; GO:0000731; GO:0003682; GO:0003688; GO:0003697; GO:0003887; GO:0005657; GO:0005658; GO:0005739; GO:0006260; GO:0006270; GO:0006272; GO:0006273; GO:0006278; GO:0006279; GO:0006302; GO:0046872; GO:0051539; GO:1902975	FALSE	0
Q06685	Q06685	reviewed	VIP1_YEAST	Inositol hexakisphosphate and diphosphoinositol-pentakisphosphate kinase (EC 2.7.4.24) (InsP6 and PP-IP5 kinase)	VIP1 YLR410W	Saccharomyces cerevisiae (strain ATCC 204508 / S288c) (Baker's yeast)	1146	inositol metabolic process [GO:0006020]; inositol phosphate biosynthetic process [GO:0032958]; phosphorylation [GO:0016310]; regulation of bipolar cell growth [GO:0051516]; regulation of microtubule cytoskeleton organization [GO:0070507]	cytoplasm [GO:0005737]; cytoskeleton [GO:0005856]; cytosol [GO:0005829]	cytoplasm [GO:0005737]; cytoskeleton [GO:0005856]; cytosol [GO:0005829]; ATP binding [GO:0005524]; diphosphoinositol-pentakisphosphate kinase activity [GO:0033857]; inositol heptakisphosphate kinase activity [GO:0000829]; inositol hexakisphosphate 1-kinase activity [GO:0052723]; inositol hexakisphosphate 3-kinase activity [GO:0052724]; inositol hexakisphosphate 4-kinase activity [GO:0000830]; ino…	SUBCELLULAR LOCATION: Cytoplasm {ECO:0000269|PubMed:14562095}. Cytoplasm, cytoskeleton {ECO:0000269|PubMed:14562095}.			ATP binding [GO:0005524]; diphosphoinositol-pentakisphosphate kinase activity [GO:0033857]; inositol heptakisphosphate kinase activity [GO:0000829]; inositol hexakisphosphate 1-kinase activity [GO:0052723]; inositol hexakisphosphate 3-kinase activity [GO:0052724]; inositol hexakisphosphate 4-kinase activity [GO:0000830]; inositol hexakisphosphate 5-kinase activity [GO:0000832]; inositol hexakisph…	GO:0000827; GO:0000828; GO:0000829; GO:0000830; GO:0000831; GO:0000832; GO:0005524; GO:0005737; GO:0005829; GO:0005856; GO:0006020; GO:0016310; GO:0032958; GO:0033857; GO:0051516; GO:0052723; GO:0052724; GO:0052843; GO:0052845; GO:0070507	FALSE	0
P40151	P40151	reviewed	WRIP1_YEAST	DNA-dependent ATPase MGS1 (Maintenance of genome stability protein 1)	MGS1 YNL218W N1302	Saccharomyces cerevisiae (strain ATCC 204508 / S288c) (Baker's yeast)	587	DNA replication, Okazaki fragment processing [GO:0033567]; DNA synthesis involved in DNA repair [GO:0000731]; DNA-templated DNA replication [GO:0006261]; regulation of DNA repair [GO:0006282]	cytoplasm [GO:0005737]; nucleus [GO:0005634]	cytoplasm [GO:0005737]; nucleus [GO:0005634]; ATP binding [GO:0005524]; ATP hydrolysis activity [GO:0016887]; DNA binding [GO:0003677]; enzyme activator activity [GO:0008047]; metal ion binding [GO:0046872]; single-stranded DNA helicase activity [GO:0017116]; DNA replication, Okazaki fragment processing [GO:0033567]; DNA synthesis involved in DNA repair [GO:0000731]; DNA-templated DNA replication…	SUBCELLULAR LOCATION: Nucleus {ECO:0000305}.			ATP binding [GO:0005524]; ATP hydrolysis activity [GO:0016887]; DNA binding [GO:0003677]; enzyme activator activity [GO:0008047]; metal ion binding [GO:0046872]; single-stranded DNA helicase activity [GO:0017116]	GO:0000731; GO:0003677; GO:0005524; GO:0005634; GO:0005737; GO:0006261; GO:0006282; GO:0008047; GO:0016887; GO:0017116; GO:0033567; GO:0046872	FALSE	0
P53849	P53849	reviewed	GIS2_YEAST	Zinc finger protein GIS2	GIS2 YNL255C N0852	Saccharomyces cerevisiae (strain ATCC 204508 / S288c) (Baker's yeast)	153	positive regulation of cytoplasmic translation [GO:2000767]	cytoplasm [GO:0005737]; cytoplasmic stress granule [GO:0010494]; P-body [GO:0000932]; polysomal ribosome [GO:0042788]	cytoplasm [GO:0005737]; cytoplasmic stress granule [GO:0010494]; P-body [GO:0000932]; polysomal ribosome [GO:0042788]; mRNA binding [GO:0003729]; single-stranded DNA binding [GO:0003697]; single-stranded RNA binding [GO:0003727]; translation regulator activity [GO:0045182]; zinc ion binding [GO:0008270]; positive regulation of cytoplasmic translation [GO:2000767]	SUBCELLULAR LOCATION: Cytoplasm {ECO:0000269|PubMed:14562095}.			mRNA binding [GO:0003729]; single-stranded DNA binding [GO:0003697]; single-stranded RNA binding [GO:0003727]; translation regulator activity [GO:0045182]; zinc ion binding [GO:0008270]	GO:0000932; GO:0003697; GO:0003727; GO:0003729; GO:0005737; GO:0008270; GO:0010494; GO:0042788; GO:0045182; GO:2000767	FALSE	0
P38715	P38715	reviewed	GRE3_YEAST	NADPH-dependent aldose reductase GRE3 (AR) (EC 1.1.1.21) (Genes de respuesta a estres protein 3) (NADPH-dependent aldo-keto reductase GRE3) (Xylose reductase) (EC 1.1.1.-)	GRE3 YHR104W	Saccharomyces cerevisiae (strain ATCC 204508 / S288c) (Baker's yeast)	327	arabinose catabolic process [GO:0019568]; cellular response to osmotic stress [GO:0071470]; cellular response to oxidative stress [GO:0034599]; D-xylose catabolic process [GO:0042843]; galactose catabolic process [GO:0019388]	cytoplasm [GO:0005737]; cytosol [GO:0005829]; nucleus [GO:0005634]	cytoplasm [GO:0005737]; cytosol [GO:0005829]; nucleus [GO:0005634]; alditol:NADP+ 1-oxidoreductase activity [GO:0004032]; D-xylose:NADP reductase activity [GO:0032866]; mRNA binding [GO:0003729]; arabinose catabolic process [GO:0019568]; cellular response to osmotic stress [GO:0071470]; cellular response to oxidative stress [GO:0034599]; D-xylose catabolic process [GO:0042843]; galactose cataboli…	SUBCELLULAR LOCATION: Cytoplasm {ECO:0000269|PubMed:14562095}. Nucleus {ECO:0000269|PubMed:14562095}.			alditol:NADP+ 1-oxidoreductase activity [GO:0004032]; D-xylose:NADP reductase activity [GO:0032866]; mRNA binding [GO:0003729]	GO:0003729; GO:0004032; GO:0005634; GO:0005737; GO:0005829; GO:0019388; GO:0019568; GO:0032866; GO:0034599; GO:0042843; GO:0071470	FALSE	0
P27636	P27636	reviewed	CDC15_YEAST	Cell division control protein 15 (EC 2.7.11.1)	CDC15 LYT1 YAR019C	Saccharomyces cerevisiae (strain ATCC 204508 / S288c) (Baker's yeast)	974	meiotic spindle disassembly [GO:0051229]; mitotic cytokinesis [GO:0000281]; negative regulation of protein localization to nucleolus [GO:1904750]; phosphorylation [GO:0016310]; positive regulation of ascospore-type prospore membrane formation [GO:1903024]; regulation of exit from mitosis [GO:0007096]	cellular bud neck [GO:0005935]; cytoplasm [GO:0005737]; spindle pole [GO:0000922]; spindle pole body [GO:0005816]	cellular bud neck [GO:0005935]; cytoplasm [GO:0005737]; spindle pole [GO:0000922]; spindle pole body [GO:0005816]; ATP binding [GO:0005524]; protein kinase activity [GO:0004672]; protein serine kinase activity [GO:0106310]; protein serine/threonine kinase activity [GO:0004674]; meiotic spindle disassembly [GO:0051229]; mitotic cytokinesis [GO:0000281]; negative regulation of protein localization …	SUBCELLULAR LOCATION: Cytoplasm, cytoskeleton, spindle pole. Bud neck. Note=Localizes to the spindle pole bodies at late anaphase and translocates to the cytoplasm upon DNA replication stress. Localization to SPBs depends on CDC5 and TEM1 and is inhibited by BUB2. Accumulates at the daughter SPB after anaphase onset when the daughter SPB begins to penetrate the bud neck. Not found in the mother S…			ATP binding [GO:0005524]; protein kinase activity [GO:0004672]; protein serine kinase activity [GO:0106310]; protein serine/threonine kinase activity [GO:0004674]	GO:0000281; GO:0000922; GO:0004672; GO:0004674; GO:0005524; GO:0005737; GO:0005816; GO:0005935; GO:0007096; GO:0016310; GO:0051229; GO:0106310; GO:1903024; GO:1904750	FALSE	0
Q05123	Q05123	reviewed	ARP9_YEAST	Actin-like protein ARP9 (Chromatin structure-remodeling complex protein ARP9) (SWI/SNF complex component ARP9)	ARP9 SWP59 YMR033W YM9973.07	Saccharomyces cerevisiae (strain ATCC 204508 / S288c) (Baker's yeast)	467	chromatin organization [GO:0006325]; chromatin remodeling [GO:0006338]; nucleosome disassembly [GO:0006337]; positive regulation of transcription by RNA polymerase II [GO:0045944]; regulation of DNA-templated transcription [GO:0006355]; regulation of transcription by RNA polymerase II [GO:0006357]; transcription elongation by RNA polymerase II [GO:0006368]	chromatin [GO:0000785]; nucleus [GO:0005634]; RSC-type complex [GO:0016586]; SWI/SNF complex [GO:0016514]	chromatin [GO:0000785]; nucleus [GO:0005634]; RSC-type complex [GO:0016586]; SWI/SNF complex [GO:0016514]; structural molecule activity [GO:0005198]; chromatin organization [GO:0006325]; chromatin remodeling [GO:0006338]; nucleosome disassembly [GO:0006337]; positive regulation of transcription by RNA polymerase II [GO:0045944]; regulation of DNA-templated transcription [GO:0006355]; regulation o…	SUBCELLULAR LOCATION: Nucleus {ECO:0000269|PubMed:12697820}. Note=Localizes to centromeric and flanking chromatin. Association with these loci is dependent on STH1.			structural molecule activity [GO:0005198]	GO:0000785; GO:0005198; GO:0005634; GO:0006325; GO:0006337; GO:0006338; GO:0006355; GO:0006357; GO:0006368; GO:0016514; GO:0016586; GO:0045944	FALSE	0
Q12458	Q12458	reviewed	YPR1_YEAST	Putative reductase 1 (EC 1.1.1.-)	YPR1 YDR368W D9481.8	Saccharomyces cerevisiae (strain ATCC 204508 / S288c) (Baker's yeast)	312	arabinose catabolic process [GO:0019568]; cellular response to oxidative stress [GO:0034599]; D-xylose catabolic process [GO:0042843]	cytoplasm [GO:0005737]; cytosol [GO:0005829]; nucleus [GO:0005634]	cytoplasm [GO:0005737]; cytosol [GO:0005829]; nucleus [GO:0005634]; alditol:NADP+ 1-oxidoreductase activity [GO:0004032]; carbonyl reductase (NADPH) activity [GO:0004090]; arabinose catabolic process [GO:0019568]; cellular response to oxidative stress [GO:0034599]; D-xylose catabolic process [GO:0042843]	SUBCELLULAR LOCATION: Cytoplasm.			alditol:NADP+ 1-oxidoreductase activity [GO:0004032]; carbonyl reductase (NADPH) activity [GO:0004090]	GO:0004032; GO:0004090; GO:0005634; GO:0005737; GO:0005829; GO:0019568; GO:0034599; GO:0042843	FALSE	0
P40102	P40102	reviewed	YE17_YEAST	Uncharacterized protein YER187W	YER187W	Saccharomyces cerevisiae (strain ATCC 204508 / S288c) (Baker's yeast)	141									FALSE	0
Q08287	Q08287	reviewed	NOP8_YEAST	60S ribosome subunit biogenesis protein NOP8 (Nucleolar protein 8)	NOP8 YOL144W	Saccharomyces cerevisiae (strain ATCC 204508 / S288c) (Baker's yeast)	484	maturation of LSU-rRNA from tricistronic rRNA transcript (SSU-rRNA, 5.8S rRNA, LSU-rRNA) [GO:0000463]; ribosomal large subunit biogenesis [GO:0042273]	nucleolus [GO:0005730]; nucleus [GO:0005634]	nucleolus [GO:0005730]; nucleus [GO:0005634]; RNA binding [GO:0003723]; maturation of LSU-rRNA from tricistronic rRNA transcript (SSU-rRNA, 5.8S rRNA, LSU-rRNA) [GO:0000463]; ribosomal large subunit biogenesis [GO:0042273]	SUBCELLULAR LOCATION: Nucleus, nucleolus {ECO:0000269|PubMed:9891085}.			RNA binding [GO:0003723]	GO:0000463; GO:0003723; GO:0005634; GO:0005730; GO:0042273	FALSE	0
P23250	P23250	reviewed	RPI1_YEAST	Negative RAS protein regulator protein	RPI1 YIL119C	Saccharomyces cerevisiae (strain ATCC 204508 / S288c) (Baker's yeast)	407	fungal-type cell wall biogenesis [GO:0009272]; positive regulation of transcription by RNA polymerase II [GO:0045944]; Ras protein signal transduction [GO:0007265]	nucleus [GO:0005634]	nucleus [GO:0005634]; DNA binding [GO:0003677]; GTPase regulator activity [GO:0030695]; fungal-type cell wall biogenesis [GO:0009272]; positive regulation of transcription by RNA polymerase II [GO:0045944]; Ras protein signal transduction [GO:0007265]	SUBCELLULAR LOCATION: Nucleus {ECO:0000305}.			DNA binding [GO:0003677]; GTPase regulator activity [GO:0030695]	GO:0003677; GO:0005634; GO:0007265; GO:0009272; GO:0030695; GO:0045944	FALSE	0
P28272	P28272	reviewed	PYRD_YEAST	Dihydroorotate dehydrogenase (fumarate) (DHOD) (DHODase) (DHOdehase) (EC 1.3.98.1) (Dihydroorotate oxidase)	URA1 YKL216W	Saccharomyces cerevisiae (strain ATCC 204508 / S288c) (Baker's yeast)	314	'de novo' pyrimidine nucleobase biosynthetic process [GO:0006207]; 'de novo' UMP biosynthetic process [GO:0044205]	cytoplasm [GO:0005737]	cytoplasm [GO:0005737]; dihydroorotate dehydrogenase (fumarate) activity [GO:1990663]; dihydroorotate dehydrogenase activity [GO:0004152]; 'de novo' pyrimidine nucleobase biosynthetic process [GO:0006207]; 'de novo' UMP biosynthetic process [GO:0044205]	SUBCELLULAR LOCATION: Cytoplasm {ECO:0000269|PubMed:1409592}.			dihydroorotate dehydrogenase (fumarate) activity [GO:1990663]; dihydroorotate dehydrogenase activity [GO:0004152]	GO:0004152; GO:0005737; GO:0006207; GO:0044205; GO:1990663	FALSE	0
Q08773	Q08773	reviewed	ISW2_YEAST	ISWI chromatin-remodeling complex ATPase ISW2 (EC 3.6.4.-) (Imitation switch protein 2)	ISW2 YOR304W	Saccharomyces cerevisiae (strain ATCC 204508 / S288c) (Baker's yeast)	1120	chromatin remodeling [GO:0006338]; negative regulation of antisense RNA transcription [GO:0060195]; negative regulation of transcription by RNA polymerase II [GO:0000122]; positive regulation of transcription by RNA polymerase II [GO:0045944]; rDNA heterochromatin formation [GO:0000183]; regulation of DNA-templated transcription [GO:0006355]; subtelomeric heterochromatin formation [GO:0031509]; t…	CHRAC [GO:0008623]; chromosome, telomeric region [GO:0000781]; nuclear microtubule [GO:0005880]; nucleus [GO:0005634]	CHRAC [GO:0008623]; chromosome, telomeric region [GO:0000781]; nuclear microtubule [GO:0005880]; nucleus [GO:0005634]; ATP binding [GO:0005524]; ATP-dependent activity, acting on DNA [GO:0008094]; ATP-dependent chromatin remodeler activity [GO:0140658]; centromeric DNA binding [GO:0019237]; chromatin binding [GO:0003682]; DNA binding [GO:0003677]; DNA translocase activity [GO:0015616]; helicase a…	SUBCELLULAR LOCATION: Nucleus {ECO:0000255|PROSITE-ProRule:PRU00624, ECO:0000269|PubMed:14562095}.			ATP binding [GO:0005524]; ATP-dependent activity, acting on DNA [GO:0008094]; ATP-dependent chromatin remodeler activity [GO:0140658]; centromeric DNA binding [GO:0019237]; chromatin binding [GO:0003682]; DNA binding [GO:0003677]; DNA translocase activity [GO:0015616]; helicase activity [GO:0004386]; hydrolase activity [GO:0016787]; nucleosome binding [GO:0031491]; single-stranded DNA binding [GO…	GO:0000122; GO:0000183; GO:0000781; GO:0003677; GO:0003682; GO:0003697; GO:0004386; GO:0005524; GO:0005634; GO:0005880; GO:0006338; GO:0006355; GO:0006369; GO:0008094; GO:0008623; GO:0015616; GO:0016787; GO:0019237; GO:0031491; GO:0031509; GO:0045944; GO:0060195; GO:0140658	FALSE	0
P41056	P41056	reviewed	RL33B_YEAST	Large ribosomal subunit protein eL33B (60S ribosomal protein L33-B) (L37) (RP47) (YL37)	RPL33B RPL37B YOR234C O5224	Saccharomyces cerevisiae (strain ATCC 204508 / S288c) (Baker's yeast)	107	cytoplasmic translation [GO:0002181]; ribosomal large subunit biogenesis [GO:0042273]	cytosol [GO:0005829]; cytosolic large ribosomal subunit [GO:0022625]	cytosol [GO:0005829]; cytosolic large ribosomal subunit [GO:0022625]; structural constituent of ribosome [GO:0003735]; cytoplasmic translation [GO:0002181]; ribosomal large subunit biogenesis [GO:0042273]	SUBCELLULAR LOCATION: Cytoplasm {ECO:0000269|PubMed:14562095, ECO:0000269|PubMed:22096102}.			structural constituent of ribosome [GO:0003735]	GO:0002181; GO:0003735; GO:0005829; GO:0022625; GO:0042273	FALSE	0
P51402	P51402	reviewed	RL37B_YEAST	Large ribosomal subunit protein eL37B (60S ribosomal protein L37-B) (L43) (YL35) (YP55)	RPL37B RPL35B YDR500C D9719.6	Saccharomyces cerevisiae (strain ATCC 204508 / S288c) (Baker's yeast)	88	cleavage in ITS2 between 5.8S rRNA and LSU-rRNA of tricistronic rRNA transcript (SSU-rRNA, 5.8S rRNA, LSU-rRNA) [GO:0000448]; cytoplasmic translation [GO:0002181]	cytosol [GO:0005829]; cytosolic large ribosomal subunit [GO:0022625]; preribosome, large subunit precursor [GO:0030687]	cytosol [GO:0005829]; cytosolic large ribosomal subunit [GO:0022625]; preribosome, large subunit precursor [GO:0030687]; metal ion binding [GO:0046872]; RNA binding [GO:0003723]; rRNA binding [GO:0019843]; structural constituent of ribosome [GO:0003735]; cleavage in ITS2 between 5.8S rRNA and LSU-rRNA of tricistronic rRNA transcript (SSU-rRNA, 5.8S rRNA, LSU-rRNA) [GO:0000448]; cytoplasmic transl…	SUBCELLULAR LOCATION: Cytoplasm {ECO:0000269|PubMed:14562095, ECO:0000269|PubMed:22096102}.			metal ion binding [GO:0046872]; RNA binding [GO:0003723]; rRNA binding [GO:0019843]; structural constituent of ribosome [GO:0003735]	GO:0000448; GO:0002181; GO:0003723; GO:0003735; GO:0005829; GO:0019843; GO:0022625; GO:0030687; GO:0046872	FALSE	0
Q04226	Q04226	reviewed	TAF11_YEAST	Transcription initiation factor TFIID subunit 11 (TAFII-40) (TAFII40) (TBP-associated factor 11) (TBP-associated factor 40 kDa) (P40)	TAF11 TAF40 YML015C YM9571.03C	Saccharomyces cerevisiae (strain ATCC 204508 / S288c) (Baker's yeast)	346	positive regulation of transcription by RNA polymerase II [GO:0045944]; RNA polymerase II preinitiation complex assembly [GO:0051123]; transcription by RNA polymerase II [GO:0006366]	nucleus [GO:0005634]; transcription factor TFIID complex [GO:0005669]	nucleus [GO:0005634]; transcription factor TFIID complex [GO:0005669]; chromatin binding [GO:0003682]; protein heterodimerization activity [GO:0046982]; transcription coactivator activity [GO:0003713]; positive regulation of transcription by RNA polymerase II [GO:0045944]; RNA polymerase II preinitiation complex assembly [GO:0051123]; transcription by RNA polymerase II [GO:0006366]	SUBCELLULAR LOCATION: Nucleus.			chromatin binding [GO:0003682]; protein heterodimerization activity [GO:0046982]; transcription coactivator activity [GO:0003713]	GO:0003682; GO:0003713; GO:0005634; GO:0005669; GO:0006366; GO:0045944; GO:0046982; GO:0051123	FALSE	0
P23337	P23337	reviewed	GYS1_YEAST	Glycogen [starch] synthase isoform 1 (EC 2.4.1.11)	GSY1 YFR015C	Saccharomyces cerevisiae (strain ATCC 204508 / S288c) (Baker's yeast)	708	glycogen biosynthetic process [GO:0005978]	cytoplasm [GO:0005737]; mitochondrion [GO:0005739]	cytoplasm [GO:0005737]; mitochondrion [GO:0005739]; glycogen (starch) synthase activity [GO:0004373]; glycogen biosynthetic process [GO:0005978]				glycogen (starch) synthase activity [GO:0004373]	GO:0004373; GO:0005737; GO:0005739; GO:0005978	FALSE	0
P41805	P41805	reviewed	RL10_YEAST	Large ribosomal subunit protein uL16 (60S ribosomal protein L10) (L9) (Ubiquinol-cytochrome C reductase complex subunit VI-requiring protein)	RPL10 GRC5 QSR1 YLR075W	Saccharomyces cerevisiae (strain ATCC 204508 / S288c) (Baker's yeast)	221	cytoplasmic translation [GO:0002181]; ribosomal large subunit assembly [GO:0000027]; translational termination [GO:0006415]	cytoplasm [GO:0005737]; cytosol [GO:0005829]; cytosolic large ribosomal subunit [GO:0022625]	cytoplasm [GO:0005737]; cytosol [GO:0005829]; cytosolic large ribosomal subunit [GO:0022625]; structural constituent of ribosome [GO:0003735]; cytoplasmic translation [GO:0002181]; ribosomal large subunit assembly [GO:0000027]; translational termination [GO:0006415]	SUBCELLULAR LOCATION: Cytoplasm {ECO:0000269|PubMed:14562095, ECO:0000269|PubMed:22096102}.			structural constituent of ribosome [GO:0003735]	GO:0000027; GO:0002181; GO:0003735; GO:0005737; GO:0005829; GO:0006415; GO:0022625	FALSE	0
P53335	P53335	reviewed	PXR1_YEAST	Protein PXR1 (G-patch nucleolar protein) (PinX1-related protein 1)	PXR1 GNO1 YGR280C	Saccharomyces cerevisiae (strain ATCC 204508 / S288c) (Baker's yeast)	271	box C/D RNA 3'-end processing [GO:0000494]; maturation of SSU-rRNA [GO:0030490]; negative regulation of telomere maintenance via telomerase [GO:0032211]	nucleolus [GO:0005730]; nucleoplasm [GO:0005654]; small-subunit processome [GO:0032040]	nucleolus [GO:0005730]; nucleoplasm [GO:0005654]; small-subunit processome [GO:0032040]; enzyme activator activity [GO:0008047]; nucleic acid binding [GO:0003676]; telomerase inhibitor activity [GO:0010521]; box C/D RNA 3'-end processing [GO:0000494]; maturation of SSU-rRNA [GO:0030490]; negative regulation of telomere maintenance via telomerase [GO:0032211]	SUBCELLULAR LOCATION: Nucleus, nucleolus {ECO:0000269|PubMed:12107183, ECO:0000269|PubMed:14562095}.			enzyme activator activity [GO:0008047]; nucleic acid binding [GO:0003676]; telomerase inhibitor activity [GO:0010521]	GO:0000494; GO:0003676; GO:0005654; GO:0005730; GO:0008047; GO:0010521; GO:0030490; GO:0032040; GO:0032211	FALSE	0
P32505	P32505	reviewed	NAB2_YEAST	Nuclear polyadenylated RNA-binding protein NAB2	NAB2 YGL122C	Saccharomyces cerevisiae (strain ATCC 204508 / S288c) (Baker's yeast)	525	mRNA polyadenylation [GO:0006378]; negative regulation of mRNA polyadenylation [GO:1900364]; negative regulation of nuclear-transcribed mRNA catabolic process, deadenylation-dependent decay [GO:1900152]; poly(A)+ mRNA export from nucleus [GO:0016973]; positive regulation of transcription by RNA polymerase III [GO:0045945]; regulation of mRNA stability [GO:0043488]	cytoplasm [GO:0005737]; nucleus [GO:0005634]	cytoplasm [GO:0005737]; nucleus [GO:0005634]; 5S rRNA binding [GO:0008097]; 7S RNA binding [GO:0008312]; metal ion binding [GO:0046872]; mRNA binding [GO:0003729]; poly(A) binding [GO:0008143]; ribonuclease P RNA binding [GO:0033204]; tRNA binding [GO:0000049]; mRNA polyadenylation [GO:0006378]; negative regulation of mRNA polyadenylation [GO:1900364]; negative regulation of nuclear-transcribed m…	SUBCELLULAR LOCATION: Nucleus {ECO:0000269|PubMed:11779864, ECO:0000269|PubMed:23222640, ECO:0000269|PubMed:8474438}. Cytoplasm {ECO:0000269|PubMed:11779864}. Note=Localizes to the nucleus at steady-state, it shuttles between nucleus and cytoplasm. {ECO:0000269|PubMed:11779864}.			5S rRNA binding [GO:0008097]; 7S RNA binding [GO:0008312]; metal ion binding [GO:0046872]; mRNA binding [GO:0003729]; poly(A) binding [GO:0008143]; ribonuclease P RNA binding [GO:0033204]; tRNA binding [GO:0000049]	GO:0000049; GO:0003729; GO:0005634; GO:0005737; GO:0006378; GO:0008097; GO:0008143; GO:0008312; GO:0016973; GO:0033204; GO:0043488; GO:0045945; GO:0046872; GO:1900152; GO:1900364	FALSE	0
P39744	P39744	reviewed	NOC2_YEAST	Nucleolar complex protein 2	NOC2 YOR206W YOX001	Saccharomyces cerevisiae (strain ATCC 204508 / S288c) (Baker's yeast)	710	ribosomal large subunit assembly [GO:0000027]; ribosomal large subunit biogenesis [GO:0042273]	mitochondrion [GO:0005739]; Noc1p-Noc2p complex [GO:0030690]; Noc2p-Noc3p complex [GO:0030691]; nucleolus [GO:0005730]; nucleoplasm [GO:0005654]; nucleus [GO:0005634]; preribosome, large subunit precursor [GO:0030687]	mitochondrion [GO:0005739]; Noc1p-Noc2p complex [GO:0030690]; Noc2p-Noc3p complex [GO:0030691]; nucleolus [GO:0005730]; nucleoplasm [GO:0005654]; nucleus [GO:0005634]; preribosome, large subunit precursor [GO:0030687]; mRNA binding [GO:0003729]; ribosomal large subunit assembly [GO:0000027]; ribosomal large subunit biogenesis [GO:0042273]	SUBCELLULAR LOCATION: Nucleus, nucleolus {ECO:0000269|PubMed:11371346}.			mRNA binding [GO:0003729]	GO:0000027; GO:0003729; GO:0005634; GO:0005654; GO:0005730; GO:0005739; GO:0030687; GO:0030690; GO:0030691; GO:0042273	FALSE	0
P26785	P26785	reviewed	RL16B_YEAST	Large ribosomal subunit protein uL13B (60S ribosomal protein L16-B) (L21) (RP23) (YL15)	RPL16B RP23 RPL21B YNL069C N2377	Saccharomyces cerevisiae (strain ATCC 204508 / S288c) (Baker's yeast)	198	cytoplasmic translation [GO:0002181]; negative regulation of translation [GO:0017148]	cytosol [GO:0005829]; cytosolic large ribosomal subunit [GO:0022625]; ribosome [GO:0005840]	cytosol [GO:0005829]; cytosolic large ribosomal subunit [GO:0022625]; ribosome [GO:0005840]; mRNA binding [GO:0003729]; RNA binding [GO:0003723]; structural constituent of ribosome [GO:0003735]; cytoplasmic translation [GO:0002181]; negative regulation of translation [GO:0017148]	SUBCELLULAR LOCATION: Cytoplasm {ECO:0000269|PubMed:22096102}.			mRNA binding [GO:0003729]; RNA binding [GO:0003723]; structural constituent of ribosome [GO:0003735]	GO:0002181; GO:0003723; GO:0003729; GO:0003735; GO:0005829; GO:0005840; GO:0017148; GO:0022625	FALSE	0
Q3E7X9	Q3E7X9	reviewed	RS28A_YEAST	Small ribosomal subunit protein eS28A (40S ribosomal protein S28-A) (S33) (YS27)	RPS28A RPS33 RPS33A YOR167C O3600	Saccharomyces cerevisiae (strain ATCC 204508 / S288c) (Baker's yeast)	67	maturation of SSU-rRNA [GO:0030490]; positive regulation of nuclear-transcribed mRNA catabolic process, deadenylation-dependent decay [GO:1900153]; ribosomal small subunit assembly [GO:0000028]; rRNA export from nucleus [GO:0006407]; translation [GO:0006412]	cytosol [GO:0005829]; cytosolic small ribosomal subunit [GO:0022627]	cytosol [GO:0005829]; cytosolic small ribosomal subunit [GO:0022627]; structural constituent of ribosome [GO:0003735]; maturation of SSU-rRNA [GO:0030490]; positive regulation of nuclear-transcribed mRNA catabolic process, deadenylation-dependent decay [GO:1900153]; ribosomal small subunit assembly [GO:0000028]; rRNA export from nucleus [GO:0006407]; translation [GO:0006412]	SUBCELLULAR LOCATION: Cytoplasm {ECO:0000269|PubMed:14562095, ECO:0000269|PubMed:22096102}.			structural constituent of ribosome [GO:0003735]	GO:0000028; GO:0003735; GO:0005829; GO:0006407; GO:0006412; GO:0022627; GO:0030490; GO:1900153	FALSE	0
P38630	P38630	reviewed	RFC1_YEAST	Replication factor C subunit 1 (Replication factor C1) (Activator 1 95 kDa subunit) (Cell division control protein 44)	RFC1 CDC44 YOR217W YOR50-7	Saccharomyces cerevisiae (strain ATCC 204508 / S288c) (Baker's yeast)	861	cell division [GO:0051301]; DNA repair [GO:0006281]; DNA-templated DNA replication [GO:0006261]; leading strand elongation [GO:0006272]; mismatch repair [GO:0006298]; mitotic cell cycle [GO:0000278]	DNA replication factor C complex [GO:0005663]; nucleus [GO:0005634]	DNA replication factor C complex [GO:0005663]; nucleus [GO:0005634]; ATP binding [GO:0005524]; ATP hydrolysis activity [GO:0016887]; DNA binding [GO:0003677]; DNA clamp loader activity [GO:0003689]; cell division [GO:0051301]; DNA repair [GO:0006281]; DNA-templated DNA replication [GO:0006261]; leading strand elongation [GO:0006272]; mismatch repair [GO:0006298]; mitotic cell cycle [GO:0000278]	SUBCELLULAR LOCATION: Nucleus {ECO:0000305}.			ATP binding [GO:0005524]; ATP hydrolysis activity [GO:0016887]; DNA binding [GO:0003677]; DNA clamp loader activity [GO:0003689]	GO:0000278; GO:0003677; GO:0003689; GO:0005524; GO:0005634; GO:0005663; GO:0006261; GO:0006272; GO:0006281; GO:0006298; GO:0016887; GO:0051301	FALSE	0
P22276	P22276	reviewed	RPC2_YEAST	DNA-directed RNA polymerase III subunit RPC2 (RNA polymerase III subunit C2) (EC 2.7.7.6) (C128) (DNA-directed RNA polymerase III 130 kDa polypeptide)	RET1 RPC128 RPC2 YOR207C	Saccharomyces cerevisiae (strain ATCC 204508 / S288c) (Baker's yeast)	1149	termination of RNA polymerase III transcription [GO:0006386]; transcription by RNA polymerase III [GO:0006383]; transcription initiation at RNA polymerase III promoter [GO:0006384]; tRNA transcription by RNA polymerase III [GO:0042797]	nucleoplasm [GO:0005654]; nucleus [GO:0005634]; RNA polymerase III complex [GO:0005666]	nucleoplasm [GO:0005654]; nucleus [GO:0005634]; RNA polymerase III complex [GO:0005666]; DNA binding [GO:0003677]; DNA-directed 5'-3' RNA polymerase activity [GO:0003899]; metal ion binding [GO:0046872]; ribonucleoside binding [GO:0032549]; termination of RNA polymerase III transcription [GO:0006386]; transcription by RNA polymerase III [GO:0006383]; transcription initiation at RNA polymerase III…	SUBCELLULAR LOCATION: Nucleus {ECO:0000269|PubMed:14562095}.			DNA binding [GO:0003677]; DNA-directed 5'-3' RNA polymerase activity [GO:0003899]; metal ion binding [GO:0046872]; ribonucleoside binding [GO:0032549]	GO:0003677; GO:0003899; GO:0005634; GO:0005654; GO:0005666; GO:0006383; GO:0006384; GO:0006386; GO:0032549; GO:0042797; GO:0046872	FALSE	0
Q02326	Q02326	reviewed	RL6A_YEAST	Large ribosomal subunit protein eL6A (60S ribosomal protein L6-A) (L17) (RP18) (YL16)	RPL6A RPL17A YL16A YML073C	Saccharomyces cerevisiae (strain ATCC 204508 / S288c) (Baker's yeast)	176	cytoplasmic translation [GO:0002181]; ribosomal large subunit assembly [GO:0000027]	cytosol [GO:0005829]; cytosolic large ribosomal subunit [GO:0022625]	cytosol [GO:0005829]; cytosolic large ribosomal subunit [GO:0022625]; RNA binding [GO:0003723]; structural constituent of ribosome [GO:0003735]; cytoplasmic translation [GO:0002181]; ribosomal large subunit assembly [GO:0000027]	SUBCELLULAR LOCATION: Cytoplasm {ECO:0000269|PubMed:14562095, ECO:0000269|PubMed:22096102}.			RNA binding [GO:0003723]; structural constituent of ribosome [GO:0003735]	GO:0000027; GO:0002181; GO:0003723; GO:0003735; GO:0005829; GO:0022625	FALSE	0
Q3E792	Q3E792	reviewed	RS25A_YEAST	Small ribosomal subunit protein eS25A (40S ribosomal protein S25-A) (RP45) (S31) (YS23)	RPS25A RPS31A YGR027C	Saccharomyces cerevisiae (strain ATCC 204508 / S288c) (Baker's yeast)	108	cytoplasmic translation [GO:0002181]	cytosol [GO:0005829]; cytosolic small ribosomal subunit [GO:0022627]	cytosol [GO:0005829]; cytosolic small ribosomal subunit [GO:0022627]; structural constituent of ribosome [GO:0003735]; cytoplasmic translation [GO:0002181]	SUBCELLULAR LOCATION: Cytoplasm {ECO:0000269|PubMed:14562095, ECO:0000269|PubMed:22096102}.			structural constituent of ribosome [GO:0003735]	GO:0002181; GO:0003735; GO:0005829; GO:0022627	FALSE	0
Q07623	Q07623	reviewed	NOP6_YEAST	Nucleolar protein 6	NOP6 YDL213C D1018	Saccharomyces cerevisiae (strain ATCC 204508 / S288c) (Baker's yeast)	225	maturation of SSU-rRNA [GO:0030490]; ribosomal small subunit biogenesis [GO:0042274]	90S preribosome [GO:0030686]; nucleolus [GO:0005730]; small-subunit processome [GO:0032040]	90S preribosome [GO:0030686]; nucleolus [GO:0005730]; small-subunit processome [GO:0032040]; rRNA binding [GO:0019843]; snoRNA binding [GO:0030515]; maturation of SSU-rRNA [GO:0030490]; ribosomal small subunit biogenesis [GO:0042274]	SUBCELLULAR LOCATION: Nucleus, nucleolus {ECO:0000269|PubMed:14562095}.			rRNA binding [GO:0019843]; snoRNA binding [GO:0030515]	GO:0005730; GO:0019843; GO:0030490; GO:0030515; GO:0030686; GO:0032040; GO:0042274	FALSE	0
P33204	P33204	reviewed	ARPC4_YEAST	Actin-related protein 2/3 complex subunit 4 (Arp2/3 complex 20 kDa) (p20-ARC)	ARC19 YKL013C YKL166	Saccharomyces cerevisiae (strain ATCC 204508 / S288c) (Baker's yeast)	171	actin cortical patch organization [GO:0044396]; actin filament polymerization [GO:0030041]; actin nucleation [GO:0045010]; Arp2/3 complex-mediated actin nucleation [GO:0034314]	actin cortical patch [GO:0030479]; actin cytoskeleton [GO:0015629]; Arp2/3 protein complex [GO:0005885]	actin cortical patch [GO:0030479]; actin cytoskeleton [GO:0015629]; Arp2/3 protein complex [GO:0005885]; actin filament binding [GO:0051015]; molecular adaptor activity [GO:0060090]; actin cortical patch organization [GO:0044396]; actin filament polymerization [GO:0030041]; actin nucleation [GO:0045010]; Arp2/3 complex-mediated actin nucleation [GO:0034314]	SUBCELLULAR LOCATION: Cytoplasm, cytoskeleton, actin patch.			actin filament binding [GO:0051015]; molecular adaptor activity [GO:0060090]	GO:0005885; GO:0015629; GO:0030041; GO:0030479; GO:0034314; GO:0044396; GO:0045010; GO:0051015; GO:0060090	FALSE	0
P02293	P02293	reviewed	H2B1_YEAST	Histone H2B.1 (Suppressor of Ty protein 12)	HTB1 H2B1 SPT12 YDR224C YD9934.09C	Saccharomyces cerevisiae (strain ATCC 204508 / S288c) (Baker's yeast)	131	chromatin organization [GO:0006325]; negative regulation of transcription by RNA polymerase II [GO:0000122]; postreplication repair [GO:0006301]; regulation of DNA-templated transcription [GO:0006355]	nucleosome [GO:0000786]; nucleus [GO:0005634]; replication fork protection complex [GO:0031298]	nucleosome [GO:0000786]; nucleus [GO:0005634]; replication fork protection complex [GO:0031298]; DNA binding [GO:0003677]; protein heterodimerization activity [GO:0046982]; structural constituent of chromatin [GO:0030527]; chromatin organization [GO:0006325]; negative regulation of transcription by RNA polymerase II [GO:0000122]; postreplication repair [GO:0006301]; regulation of DNA-templated tr…	SUBCELLULAR LOCATION: Nucleus. Chromosome.			DNA binding [GO:0003677]; protein heterodimerization activity [GO:0046982]; structural constituent of chromatin [GO:0030527]	GO:0000122; GO:0000786; GO:0003677; GO:0005634; GO:0006301; GO:0006325; GO:0006355; GO:0030527; GO:0031298; GO:0046982	FALSE	0
P26786	P26786	reviewed	RS7A_YEAST	Small ribosomal subunit protein eS7A (40S ribosomal protein S7-A) (RP30) (RP40)	RPS7A RPS30 YOR096W YOR3177W	Saccharomyces cerevisiae (strain ATCC 204508 / S288c) (Baker's yeast)	190	cytoplasmic translation [GO:0002181]; ribosomal small subunit biogenesis [GO:0042274]; ribosome biogenesis [GO:0042254]; rRNA processing [GO:0006364]	90S preribosome [GO:0030686]; cytosol [GO:0005829]; cytosolic small ribosomal subunit [GO:0022627]; nucleolus [GO:0005730]; nucleoplasm [GO:0005654]; small-subunit processome [GO:0032040]	90S preribosome [GO:0030686]; cytosol [GO:0005829]; cytosolic small ribosomal subunit [GO:0022627]; nucleolus [GO:0005730]; nucleoplasm [GO:0005654]; small-subunit processome [GO:0032040]; structural constituent of ribosome [GO:0003735]; cytoplasmic translation [GO:0002181]; ribosomal small subunit biogenesis [GO:0042274]; ribosome biogenesis [GO:0042254]; rRNA processing [GO:0006364]	SUBCELLULAR LOCATION: Cytoplasm {ECO:0000269|PubMed:22096102}. Nucleus, nucleolus {ECO:0000269|PubMed:15590835}.			structural constituent of ribosome [GO:0003735]	GO:0002181; GO:0003735; GO:0005654; GO:0005730; GO:0005829; GO:0006364; GO:0022627; GO:0030686; GO:0032040; GO:0042254; GO:0042274	FALSE	0
P11433	P11433	reviewed	CDC24_YEAST	Cell division control protein 24 (Calcium regulatory protein)	CDC24 CLS4 YAL041W	Saccharomyces cerevisiae (strain ATCC 204508 / S288c) (Baker's yeast)	854	cellular bud site selection [GO:0000282]; chemotropism [GO:0043577]; establishment of cell polarity [GO:0030010]; intracellular signal transduction [GO:0035556]; protein localization to cell cortex [GO:0072697]; regulation of exit from mitosis [GO:0007096]; regulation of pheromone-dependent signal transduction involved in conjugation with cellular fusion [GO:0010969]; regulation of Rho protein si…	Cdc24p-Far1p-Gbetagamma complex [GO:0120171]; cell cortex [GO:0005938]; cellular bud neck [GO:0005935]; cellular bud tip [GO:0005934]; cytoplasm [GO:0005737]; division septum [GO:0000935]; incipient cellular bud site [GO:0000131]; mating projection tip [GO:0043332]; nucleus [GO:0005634]; PAR polarity complex [GO:0120157]	Cdc24p-Far1p-Gbetagamma complex [GO:0120171]; cell cortex [GO:0005938]; cellular bud neck [GO:0005935]; cellular bud tip [GO:0005934]; cytoplasm [GO:0005737]; division septum [GO:0000935]; incipient cellular bud site [GO:0000131]; mating projection tip [GO:0043332]; nucleus [GO:0005634]; PAR polarity complex [GO:0120157]; guanyl-nucleotide exchange factor activity [GO:0005085]; cellular bud site …				guanyl-nucleotide exchange factor activity [GO:0005085]	GO:0000131; GO:0000282; GO:0000935; GO:0005085; GO:0005634; GO:0005737; GO:0005934; GO:0005935; GO:0005938; GO:0007096; GO:0010969; GO:0030010; GO:0031106; GO:0035023; GO:0035556; GO:0043332; GO:0043577; GO:0072697; GO:0120157; GO:0120171	FALSE	0
P09959	P09959	reviewed	SWI6_YEAST	Regulatory protein SWI6 (Cell-cycle box factor subunit SWI6) (MBF subunit P90) (Trans-acting activator of HO endonuclease gene)	SWI6 YLR182W L9470.8	Saccharomyces cerevisiae (strain ATCC 204508 / S288c) (Baker's yeast)	803	G1/S transition of mitotic cell cycle [GO:0000082]; positive regulation of reciprocal meiotic recombination [GO:0010845]; positive regulation of transcription by RNA polymerase II [GO:0045944]; positive regulation of transcription from RNA polymerase II promoter in response to heat stress [GO:0061408]; positive regulation of transcription involved in G1/S transition of mitotic cell cycle [GO:0071…	cytoplasm [GO:0005737]; MBF transcription complex [GO:0030907]; nucleus [GO:0005634]; SBF transcription complex [GO:0033309]	cytoplasm [GO:0005737]; MBF transcription complex [GO:0030907]; nucleus [GO:0005634]; SBF transcription complex [GO:0033309]; DNA binding [GO:0003677]; transcription coactivator activity [GO:0003713]; G1/S transition of mitotic cell cycle [GO:0000082]; positive regulation of reciprocal meiotic recombination [GO:0010845]; positive regulation of transcription by RNA polymerase II [GO:0045944]; posi…	SUBCELLULAR LOCATION: Nucleus. Cytoplasm.			DNA binding [GO:0003677]; transcription coactivator activity [GO:0003713]	GO:0000082; GO:0003677; GO:0003713; GO:0005634; GO:0005737; GO:0006355; GO:0010845; GO:0030907; GO:0033309; GO:0045944; GO:0061408; GO:0071931	FALSE	0
Q04225	Q04225	reviewed	RRB1_YEAST	Ribosome assembly protein RRB1	RRB1 YMR131C YM9553.07C	Saccharomyces cerevisiae (strain ATCC 204508 / S288c) (Baker's yeast)	511	ribosome biogenesis [GO:0042254]; rRNA processing [GO:0006364]	nucleolus [GO:0005730]	nucleolus [GO:0005730]; unfolded protein binding [GO:0051082]; ribosome biogenesis [GO:0042254]; rRNA processing [GO:0006364]	SUBCELLULAR LOCATION: Nucleus.			unfolded protein binding [GO:0051082]	GO:0005730; GO:0006364; GO:0042254; GO:0051082	FALSE	0
P0CX82	P0CX82	reviewed	RL19A_YEAST	Large ribosomal subunit protein eL19A (60S ribosomal protein L19-A) (L23) (RP15L) (RP33) (YL14)	RPL19A RPL23A YL14A YBR084C-A YBR084BC	Saccharomyces cerevisiae (strain ATCC 204508 / S288c) (Baker's yeast)	189	cytoplasmic translation [GO:0002181]	cytosol [GO:0005829]; cytosolic large ribosomal subunit [GO:0022625]	cytosol [GO:0005829]; cytosolic large ribosomal subunit [GO:0022625]; RNA binding [GO:0003723]; structural constituent of ribosome [GO:0003735]; cytoplasmic translation [GO:0002181]	SUBCELLULAR LOCATION: Cytoplasm {ECO:0000269|PubMed:14562095, ECO:0000269|PubMed:22096102}.			RNA binding [GO:0003723]; structural constituent of ribosome [GO:0003735]	GO:0002181; GO:0003723; GO:0003735; GO:0005829; GO:0022625	FALSE	0
P0CX84	P0CX84	reviewed	RL35A_YEAST	Large ribosomal subunit protein uL29A (60S ribosomal protein L35-A)	RPL35A SOS1 YDL191W D1249	Saccharomyces cerevisiae (strain ATCC 204508 / S288c) (Baker's yeast)	120	cytoplasmic translation [GO:0002181]; maturation of LSU-rRNA from tricistronic rRNA transcript (SSU-rRNA, 5.8S rRNA, LSU-rRNA) [GO:0000463]	cytosol [GO:0005829]; cytosolic large ribosomal subunit [GO:0022625]; preribosome, large subunit precursor [GO:0030687]	cytosol [GO:0005829]; cytosolic large ribosomal subunit [GO:0022625]; preribosome, large subunit precursor [GO:0030687]; mRNA binding [GO:0003729]; structural constituent of ribosome [GO:0003735]; cytoplasmic translation [GO:0002181]; maturation of LSU-rRNA from tricistronic rRNA transcript (SSU-rRNA, 5.8S rRNA, LSU-rRNA) [GO:0000463]	SUBCELLULAR LOCATION: Cytoplasm {ECO:0000269|PubMed:14562095, ECO:0000269|PubMed:22096102}.			mRNA binding [GO:0003729]; structural constituent of ribosome [GO:0003735]	GO:0000463; GO:0002181; GO:0003729; GO:0003735; GO:0005829; GO:0022625; GO:0030687	FALSE	0
Q03941	Q03941	reviewed	CAB5_YEAST	Dephospho-CoA kinase CAB5 (DPCK) (EC 2.7.1.24) (Dephosphocoenzyme A kinase)	CAB5 YDR196C YD9346.07C	Saccharomyces cerevisiae (strain ATCC 204508 / S288c) (Baker's yeast)	241	coenzyme A biosynthetic process [GO:0015937]; phosphorylation [GO:0016310]	CoA-synthesizing protein complex [GO:1990143]; cytosol [GO:0005829]; endoplasmic reticulum [GO:0005783]; lipid droplet [GO:0005811]; mitochondrion [GO:0005739]; nuclear envelope [GO:0005635]	CoA-synthesizing protein complex [GO:1990143]; cytosol [GO:0005829]; endoplasmic reticulum [GO:0005783]; lipid droplet [GO:0005811]; mitochondrion [GO:0005739]; nuclear envelope [GO:0005635]; ATP binding [GO:0005524]; dephospho-CoA kinase activity [GO:0004140]; coenzyme A biosynthetic process [GO:0015937]; phosphorylation [GO:0016310]	SUBCELLULAR LOCATION: Endoplasmic reticulum {ECO:0000269|PubMed:14690591}. Mitochondrion {ECO:0000269|PubMed:14690591, ECO:0000269|PubMed:16823961}. Nucleus {ECO:0000269|PubMed:14690591}. Note=Nuclear envelope. {ECO:0000269|PubMed:14690591}.			ATP binding [GO:0005524]; dephospho-CoA kinase activity [GO:0004140]	GO:0004140; GO:0005524; GO:0005635; GO:0005739; GO:0005783; GO:0005811; GO:0005829; GO:0015937; GO:0016310; GO:1990143	FALSE	0
Q08954	Q08954	reviewed	YP199_YEAST	Smr domain-containing protein YPL199C	YPL199C	Saccharomyces cerevisiae (strain ATCC 204508 / S288c) (Baker's yeast)	240	nuclear-transcribed mRNA catabolic process, non-stop decay [GO:0070481]	cell periphery [GO:0071944]; cytoplasm [GO:0005737]	cell periphery [GO:0071944]; cytoplasm [GO:0005737]; nuclear-transcribed mRNA catabolic process, non-stop decay [GO:0070481]	SUBCELLULAR LOCATION: Cytoplasm {ECO:0000269|PubMed:14562095}.				GO:0005737; GO:0070481; GO:0071944	FALSE	0
P53090	P53090	reviewed	ARO8_YEAST	Aromatic/aminoadipate aminotransferase 1 (2-aminoadipate aminotransferase) (EC 2.6.1.39) (2-aminoadipate transaminase) (Alpha-aminoadipate aminotransferase) (AadAT) (Aromatic amino acid aminotransferase 1) (EC 2.6.1.57) (Aromatic amino acid aminotransferase I) (Aromatic amino acid-requiring protein 8)	ARO8 YGL202W	Saccharomyces cerevisiae (strain ATCC 204508 / S288c) (Baker's yeast)	500	aromatic amino acid family catabolic process [GO:0009074]; aromatic amino acid metabolic process [GO:0009072]; L-methionine salvage from methylthioadenosine [GO:0019509]; L-phenylalanine biosynthetic process [GO:0009094]; lysine biosynthetic process via aminoadipic acid [GO:0019878]; tyrosine biosynthetic process [GO:0006571]	cytoplasm [GO:0005737]	cytoplasm [GO:0005737]; 2-aminoadipate transaminase activity [GO:0047536]; aromatic-amino-acid:2-oxoglutarate aminotransferase activity [GO:0008793]; L-phenylalanine:2-oxoglutarate aminotransferase activity [GO:0080130]; pyridoxal phosphate binding [GO:0030170]; aromatic amino acid family catabolic process [GO:0009074]; aromatic amino acid metabolic process [GO:0009072]; L-methionine salvage from…	SUBCELLULAR LOCATION: Cytoplasm {ECO:0000269|PubMed:14562095}.			2-aminoadipate transaminase activity [GO:0047536]; aromatic-amino-acid:2-oxoglutarate aminotransferase activity [GO:0008793]; L-phenylalanine:2-oxoglutarate aminotransferase activity [GO:0080130]; pyridoxal phosphate binding [GO:0030170]	GO:0005737; GO:0006571; GO:0008793; GO:0009072; GO:0009074; GO:0009094; GO:0019509; GO:0019878; GO:0030170; GO:0047536; GO:0080130	FALSE	0
P14127	P14127	reviewed	RS17B_YEAST	Small ribosomal subunit protein eS17B (40S ribosomal protein S17-B) (RP51B)	RPS17B RP51B YDR447C	Saccharomyces cerevisiae (strain ATCC 204508 / S288c) (Baker's yeast)	136	cytoplasmic translation [GO:0002181]; ribosomal small subunit assembly [GO:0000028]	cytosol [GO:0005829]; cytosolic small ribosomal subunit [GO:0022627]	cytosol [GO:0005829]; cytosolic small ribosomal subunit [GO:0022627]; structural constituent of ribosome [GO:0003735]; cytoplasmic translation [GO:0002181]; ribosomal small subunit assembly [GO:0000028]	SUBCELLULAR LOCATION: Cytoplasm {ECO:0000269|PubMed:14562095, ECO:0000269|PubMed:22096102}.			structural constituent of ribosome [GO:0003735]	GO:0000028; GO:0002181; GO:0003735; GO:0005829; GO:0022627	FALSE	0
P04449	P04449	reviewed	RL24A_YEAST	Large ribosomal subunit protein eL24A (60S ribosomal protein L24-A) (L30) (RP29) (YL21)	RPL24A RP29 RPL30A YGL031C	Saccharomyces cerevisiae (strain ATCC 204508 / S288c) (Baker's yeast)	155	cytoplasmic translation [GO:0002181]	cytosol [GO:0005829]; cytosolic large ribosomal subunit [GO:0022625]	cytosol [GO:0005829]; cytosolic large ribosomal subunit [GO:0022625]; mRNA binding [GO:0003729]; RNA binding [GO:0003723]; structural constituent of ribosome [GO:0003735]; cytoplasmic translation [GO:0002181]	SUBCELLULAR LOCATION: Cytoplasm {ECO:0000269|PubMed:14562095, ECO:0000269|PubMed:22096102}.			mRNA binding [GO:0003729]; RNA binding [GO:0003723]; structural constituent of ribosome [GO:0003735]	GO:0002181; GO:0003723; GO:0003729; GO:0003735; GO:0005829; GO:0022625	FALSE	0
P37292	P37292	reviewed	GLYM_YEAST	Serine hydroxymethyltransferase, mitochondrial (SHMT) (EC 2.1.2.1) (Glycine hydroxymethyltransferase) (Serine methylase)	SHM1 SHMT1 YBR263W YBR1732	Saccharomyces cerevisiae (strain ATCC 204508 / S288c) (Baker's yeast)	490	folic acid metabolic process [GO:0046655]; glycine biosynthetic process from serine [GO:0019264]; L-serine catabolic process [GO:0006565]; one-carbon metabolic process [GO:0006730]; tetrahydrofolate interconversion [GO:0035999]; tetrahydrofolate metabolic process [GO:0046653]	cytoplasm [GO:0005737]; mitochondrion [GO:0005739]	cytoplasm [GO:0005737]; mitochondrion [GO:0005739]; glycine hydroxymethyltransferase activity [GO:0004372]; pyridoxal phosphate binding [GO:0030170]; serine binding [GO:0070905]; zinc ion binding [GO:0008270]; folic acid metabolic process [GO:0046655]; glycine biosynthetic process from serine [GO:0019264]; L-serine catabolic process [GO:0006565]; one-carbon metabolic process [GO:0006730]; tetrahy…	SUBCELLULAR LOCATION: Mitochondrion.			glycine hydroxymethyltransferase activity [GO:0004372]; pyridoxal phosphate binding [GO:0030170]; serine binding [GO:0070905]; zinc ion binding [GO:0008270]	GO:0004372; GO:0005737; GO:0005739; GO:0006565; GO:0006730; GO:0008270; GO:0019264; GO:0030170; GO:0035999; GO:0046653; GO:0046655; GO:0070905	FALSE	0
P22023	P22023	reviewed	KRE5_YEAST	Killer toxin-resistance protein 5	KRE5 YOR336W	Saccharomyces cerevisiae (strain ATCC 204508 / S288c) (Baker's yeast)	1365	cell wall organization [GO:0071555]; ER-associated misfolded protein catabolic process [GO:0071712]; fungal-type cell wall beta-glucan biosynthetic process [GO:0070880]; protein N-linked glycosylation via asparagine [GO:0018279]	endoplasmic reticulum [GO:0005783]; endoplasmic reticulum lumen [GO:0005788]	endoplasmic reticulum [GO:0005783]; endoplasmic reticulum lumen [GO:0005788]; UDP-glucose:glycoprotein glucosyltransferase activity [GO:0003980]; unfolded protein binding [GO:0051082]; cell wall organization [GO:0071555]; ER-associated misfolded protein catabolic process [GO:0071712]; fungal-type cell wall beta-glucan biosynthetic process [GO:0070880]; protein N-linked glycosylation via asparagin…	SUBCELLULAR LOCATION: Endoplasmic reticulum lumen.			UDP-glucose:glycoprotein glucosyltransferase activity [GO:0003980]; unfolded protein binding [GO:0051082]	GO:0003980; GO:0005783; GO:0005788; GO:0018279; GO:0051082; GO:0070880; GO:0071555; GO:0071712	FALSE	0
Q02256	Q02256	reviewed	PVH1_YEAST	Tyrosine-protein phosphatase YVH1 (PTPase YVH1) (EC 3.1.3.48)	YVH1 YIR026C	Saccharomyces cerevisiae (strain ATCC 204508 / S288c) (Baker's yeast)	364	ascospore wall assembly [GO:0030476]; dephosphorylation [GO:0016311]; meiotic cell cycle [GO:0051321]; positive regulation of autophagosome assembly [GO:2000786]; ribosomal large subunit assembly [GO:0000027]; ribosomal large subunit export from nucleus [GO:0000055]	cytoplasm [GO:0005737]; cytoplasmic stress granule [GO:0010494]; nucleus [GO:0005634]	cytoplasm [GO:0005737]; cytoplasmic stress granule [GO:0010494]; nucleus [GO:0005634]; preribosome binding [GO:1990275]; protein tyrosine phosphatase activity [GO:0004725]; protein tyrosine/serine/threonine phosphatase activity [GO:0008138]; ascospore wall assembly [GO:0030476]; dephosphorylation [GO:0016311]; meiotic cell cycle [GO:0051321]; positive regulation of autophagosome assembly [GO:2000…				preribosome binding [GO:1990275]; protein tyrosine phosphatase activity [GO:0004725]; protein tyrosine/serine/threonine phosphatase activity [GO:0008138]	GO:0000027; GO:0000055; GO:0004725; GO:0005634; GO:0005737; GO:0008138; GO:0010494; GO:0016311; GO:0030476; GO:0051321; GO:1990275; GO:2000786	FALSE	0
Q03834	Q03834	reviewed	MSH6_YEAST	DNA mismatch repair protein MSH6 (MutS protein homolog 6) (Postmeiotic segregation protein 3)	MSH6 PMS3 YDR097C YD8557.04C	Saccharomyces cerevisiae (strain ATCC 204508 / S288c) (Baker's yeast)	1242	interstrand cross-link repair [GO:0036297]; meiotic mismatch repair [GO:0000710]; mismatch repair [GO:0006298]; replication fork arrest [GO:0043111]	cytoplasm [GO:0005737]; MutSalpha complex [GO:0032301]; nucleus [GO:0005634]	cytoplasm [GO:0005737]; MutSalpha complex [GO:0032301]; nucleus [GO:0005634]; ATP binding [GO:0005524]; ATP hydrolysis activity [GO:0016887]; ATP-dependent DNA damage sensor activity [GO:0140664]; four-way junction DNA binding [GO:0000400]; mismatched DNA binding [GO:0030983]; nucleic acid binding [GO:0003676]; interstrand cross-link repair [GO:0036297]; meiotic mismatch repair [GO:0000710]; mism…	SUBCELLULAR LOCATION: Nucleus {ECO:0000269|PubMed:14562095}.			ATP binding [GO:0005524]; ATP hydrolysis activity [GO:0016887]; ATP-dependent DNA damage sensor activity [GO:0140664]; four-way junction DNA binding [GO:0000400]; mismatched DNA binding [GO:0030983]; nucleic acid binding [GO:0003676]	GO:0000400; GO:0000710; GO:0003676; GO:0005524; GO:0005634; GO:0005737; GO:0006298; GO:0016887; GO:0030983; GO:0032301; GO:0036297; GO:0043111; GO:0140664	FALSE	0
P47139	P47139	reviewed	YJ68_YEAST	Uncharacterized protein YJR098C	YJR098C J1936	Saccharomyces cerevisiae (strain ATCC 204508 / S288c) (Baker's yeast)	656	lipid metabolic process [GO:0006629]	cytoplasm [GO:0005737]; mitochondrion [GO:0005739]	cytoplasm [GO:0005737]; mitochondrion [GO:0005739]; O-acyltransferase activity [GO:0008374]; triglyceride lipase activity [GO:0004806]; lipid metabolic process [GO:0006629]	SUBCELLULAR LOCATION: Cytoplasm. Mitochondrion.			O-acyltransferase activity [GO:0008374]; triglyceride lipase activity [GO:0004806]	GO:0004806; GO:0005737; GO:0005739; GO:0006629; GO:0008374	FALSE	0
P22470	P22470	reviewed	SAN1_YEAST	Protein SAN1	SAN1 YDR143C YD2943.02C	Saccharomyces cerevisiae (strain ATCC 204508 / S288c) (Baker's yeast)	610	nuclear protein quality control by the ubiquitin-proteasome system [GO:0071630]; response to misfolded protein [GO:0051788]; ubiquitin-dependent protein catabolic process [GO:0006511]	cytoplasm [GO:0005737]; nucleus [GO:0005634]	cytoplasm [GO:0005737]; nucleus [GO:0005634]; metal ion binding [GO:0046872]; ubiquitin protein ligase activity [GO:0061630]; ubiquitin-protein transferase activity [GO:0004842]; nuclear protein quality control by the ubiquitin-proteasome system [GO:0071630]; response to misfolded protein [GO:0051788]; ubiquitin-dependent protein catabolic process [GO:0006511]				metal ion binding [GO:0046872]; ubiquitin protein ligase activity [GO:0061630]; ubiquitin-protein transferase activity [GO:0004842]	GO:0004842; GO:0005634; GO:0005737; GO:0006511; GO:0046872; GO:0051788; GO:0061630; GO:0071630	FALSE	0
P33313	P33313	reviewed	CNS1_YEAST	Hsp70/Hsp90 co-chaperone CNS1 (Cyclophilin seven suppressor 1) (STI1 stress-inducible protein homolog)	CNS1 YBR155W YBR1205	Saccharomyces cerevisiae (strain ATCC 204508 / S288c) (Baker's yeast)	385	protein folding [GO:0006457]; protein refolding [GO:0042026]	cytoplasm [GO:0005737]; nucleus [GO:0005634]	cytoplasm [GO:0005737]; nucleus [GO:0005634]; Hsp70 protein binding [GO:0030544]; Hsp90 protein binding [GO:0051879]; ribosome binding [GO:0043022]; protein folding [GO:0006457]; protein refolding [GO:0042026]	SUBCELLULAR LOCATION: Cytoplasm {ECO:0000269|PubMed:14562095}.			Hsp70 protein binding [GO:0030544]; Hsp90 protein binding [GO:0051879]; ribosome binding [GO:0043022]	GO:0005634; GO:0005737; GO:0006457; GO:0030544; GO:0042026; GO:0043022; GO:0051879	FALSE	0
P14922	P14922	reviewed	CYC8_YEAST	General transcriptional corepressor CYC8 (Glucose repression mediator protein CYC8)	CYC8 CRT8 SSN6 YBR112C YBR0908	Saccharomyces cerevisiae (strain ATCC 204508 / S288c) (Baker's yeast)	966	chromatin remodeling [GO:0006338]; hyperosmotic response [GO:0006972]; negative regulation of DNA-templated transcription [GO:0045892]; negative regulation of transcription by RNA polymerase II [GO:0000122]; positive regulation of transcription by RNA polymerase II [GO:0045944]; regulation of transcription by RNA polymerase II [GO:0006357]	nucleus [GO:0005634]; transcription repressor complex [GO:0017053]	nucleus [GO:0005634]; transcription repressor complex [GO:0017053]; chromatin DNA binding [GO:0031490]; histone deacetylase binding [GO:0042826]; RNA polymerase II cis-regulatory region sequence-specific DNA binding [GO:0000978]; transcription coactivator activity [GO:0003713]; transcription corepressor activity [GO:0003714]; chromatin remodeling [GO:0006338]; hyperosmotic response [GO:0006972]; …	SUBCELLULAR LOCATION: Nucleus.			chromatin DNA binding [GO:0031490]; histone deacetylase binding [GO:0042826]; RNA polymerase II cis-regulatory region sequence-specific DNA binding [GO:0000978]; transcription coactivator activity [GO:0003713]; transcription corepressor activity [GO:0003714]	GO:0000122; GO:0000978; GO:0003713; GO:0003714; GO:0005634; GO:0006338; GO:0006357; GO:0006972; GO:0017053; GO:0031490; GO:0042826; GO:0045892; GO:0045944	FALSE	0
P36108	P36108	reviewed	DID4_YEAST	DOA4-independent degradation protein 4 (ESCRT-III complex subunit VPS2) (Vacuolar protein-sorting-associated protein 2) (Vacuolar protein-targeting protein 14)	DID4 CHM2 GRD7 REN1 VPL2 VPS2 VPT14 YKL002W	Saccharomyces cerevisiae (strain ATCC 204508 / S288c) (Baker's yeast)	232	ATP export [GO:1904669]; endosome transport via multivesicular body sorting pathway [GO:0032509]; intralumenal vesicle formation [GO:0070676]; late endosome to vacuole transport [GO:0045324]; protein retention in Golgi apparatus [GO:0045053]; protein transport [GO:0015031]; ubiquitin-dependent protein catabolic process via the multivesicular body sorting pathway [GO:0043162]	cytoplasm [GO:0005737]; ESCRT III complex [GO:0000815]; multivesicular body [GO:0005771]	cytoplasm [GO:0005737]; ESCRT III complex [GO:0000815]; multivesicular body [GO:0005771]; ATP export [GO:1904669]; endosome transport via multivesicular body sorting pathway [GO:0032509]; intralumenal vesicle formation [GO:0070676]; late endosome to vacuole transport [GO:0045324]; protein retention in Golgi apparatus [GO:0045053]; protein transport [GO:0015031]; ubiquitin-dependent protein catabo…	SUBCELLULAR LOCATION: Cytoplasm {ECO:0000269|PubMed:12194857}. Endosome membrane {ECO:0000269|PubMed:12194857}; Peripheral membrane protein {ECO:0000269|PubMed:12194857}.				GO:0000815; GO:0005737; GO:0005771; GO:0015031; GO:0032509; GO:0043162; GO:0045053; GO:0045324; GO:0070676; GO:1904669	FALSE	0
Q07825	Q07825	reviewed	FRA1_YEAST	Putative Xaa-Pro aminopeptidase FRA1 (EC 3.4.11.9) (Fe repressor of activation 1)	FRA1 YLL029W	Saccharomyces cerevisiae (strain ATCC 204508 / S288c) (Baker's yeast)	749	negative regulation of transcription by RNA polymerase II [GO:0000122]; proteolysis [GO:0006508]	cytoplasm [GO:0005737]; cytosol [GO:0005829]	cytoplasm [GO:0005737]; cytosol [GO:0005829]; metal ion binding [GO:0046872]; metalloaminopeptidase activity [GO:0070006]; negative regulation of transcription by RNA polymerase II [GO:0000122]; proteolysis [GO:0006508]	SUBCELLULAR LOCATION: Cytoplasm {ECO:0000269|PubMed:14562095}.			metal ion binding [GO:0046872]; metalloaminopeptidase activity [GO:0070006]	GO:0000122; GO:0005737; GO:0005829; GO:0006508; GO:0046872; GO:0070006	FALSE	0
P32364	P32364	reviewed	SMY1_YEAST	Kinesin-related protein SMY1 (Suppressor protein SMY1)	SMY1 YKL079W YKL409	Saccharomyces cerevisiae (strain ATCC 204508 / S288c) (Baker's yeast)	656	cytoskeleton-dependent intracellular transport [GO:0030705]; microtubule-based movement [GO:0007018]; vesicle docking involved in exocytosis [GO:0006904]	cellular bud neck [GO:0005935]; cellular bud tip [GO:0005934]; cytoplasm [GO:0005737]; incipient cellular bud site [GO:0000131]; kinesin complex [GO:0005871]; mating projection tip [GO:0043332]; microtubule [GO:0005874]	cellular bud neck [GO:0005935]; cellular bud tip [GO:0005934]; cytoplasm [GO:0005737]; incipient cellular bud site [GO:0000131]; kinesin complex [GO:0005871]; mating projection tip [GO:0043332]; microtubule [GO:0005874]; ATP binding [GO:0005524]; ATP hydrolysis activity [GO:0016887]; cytoskeletal motor activity [GO:0003774]; microtubule binding [GO:0008017]; plus-end-directed microtubule motor ac…	SUBCELLULAR LOCATION: Cytoplasm, cytoskeleton {ECO:0000305}.			ATP binding [GO:0005524]; ATP hydrolysis activity [GO:0016887]; cytoskeletal motor activity [GO:0003774]; microtubule binding [GO:0008017]; plus-end-directed microtubule motor activity [GO:0008574]	GO:0000131; GO:0003774; GO:0005524; GO:0005737; GO:0005871; GO:0005874; GO:0005934; GO:0005935; GO:0006904; GO:0007018; GO:0008017; GO:0008574; GO:0016887; GO:0030705; GO:0043332	FALSE	0
P53258	P53258	reviewed	GYP2_YEAST	GTPase-activating protein GYP2 (MAC1-dependent regulator) (Protein MIC1)	MDR1 GYP2 MIC1 YGR100W G5717	Saccharomyces cerevisiae (strain ATCC 204508 / S288c) (Baker's yeast)	950	activation of GTPase activity [GO:0090630]	cytoplasm [GO:0005737]	cytoplasm [GO:0005737]; calcium ion binding [GO:0005509]; GTPase activator activity [GO:0005096]; activation of GTPase activity [GO:0090630]	SUBCELLULAR LOCATION: Cytoplasm {ECO:0000269|PubMed:12807768, ECO:0000269|PubMed:14562095}. Note=Distributed throughout the cytoplasm and accumulates in punctate structures, which concentrate in an actin-dependent manner at sites of polarized growth.			calcium ion binding [GO:0005509]; GTPase activator activity [GO:0005096]	GO:0005096; GO:0005509; GO:0005737; GO:0090630	FALSE	0
P07273	P07273	reviewed	TFS2_YEAST	Transcription elongation factor S-II (DNA strand transfer protein alpha) (STP-alpha) (DNA strand transferase 1) (Pyrimidine pathway regulatory protein 2)	DST1 PPR2 YGL043W	Saccharomyces cerevisiae (strain ATCC 204508 / S288c) (Baker's yeast)	309	DNA-templated transcription [GO:0006351]; maintenance of transcriptional fidelity during transcription elongation by RNA polymerase II [GO:0001193]; positive regulation of RNA polymerase II transcription preinitiation complex assembly [GO:0045899]; positive regulation of transcription elongation by RNA polymerase II [GO:0032968]; regulation of mRNA 3'-end processing [GO:0031440]; transcription an…	nucleus [GO:0005634]	nucleus [GO:0005634]; RNA polymerase II complex binding [GO:0000993]; RNA polymerase II complex recruiting activity [GO:0001139]; RNA polymerase II transcription regulatory region sequence-specific DNA binding [GO:0000977]; zinc ion binding [GO:0008270]; DNA-templated transcription [GO:0006351]; maintenance of transcriptional fidelity during transcription elongation by RNA polymerase II [GO:00011…	SUBCELLULAR LOCATION: Nucleus.			RNA polymerase II complex binding [GO:0000993]; RNA polymerase II complex recruiting activity [GO:0001139]; RNA polymerase II transcription regulatory region sequence-specific DNA binding [GO:0000977]; zinc ion binding [GO:0008270]	GO:0000977; GO:0000993; GO:0001139; GO:0001193; GO:0005634; GO:0006351; GO:0006362; GO:0006367; GO:0006368; GO:0006383; GO:0008270; GO:0031440; GO:0031564; GO:0032968; GO:0042797; GO:0045899	FALSE	0
P25382	P25382	reviewed	NLE1_YEAST	Ribosome assembly protein 4 (Notchless protein homolog 1) (Ribosome biogenesis factor RSA4)	RSA4 YCR072C YCR72C	Saccharomyces cerevisiae (strain ATCC 204508 / S288c) (Baker's yeast)	515	protein-RNA complex remodeling [GO:0110136]; ribosomal large subunit assembly [GO:0000027]	nucleolus [GO:0005730]	nucleolus [GO:0005730]; protein-RNA complex remodeling [GO:0110136]; ribosomal large subunit assembly [GO:0000027]	SUBCELLULAR LOCATION: Nucleus, nucleolus {ECO:0000269|PubMed:16221974}.				GO:0000027; GO:0005730; GO:0110136	FALSE	0
P25555	P25555	reviewed	GBP2_YEAST	Serine/arginine (SR)-type shuttling mRNA binding protein GBP2 (Polyadenylate-binding protein GBP2) (RAP1 localization factor 6) (Single-strand telomeric DNA-binding protein GBP2) (G-strand-binding protein 2)	GBP2 RLF6 YCL011C YCL11C	Saccharomyces cerevisiae (strain ATCC 204508 / S288c) (Baker's yeast)	427	nuclear mRNA surveillance [GO:0071028]; poly(A)+ mRNA export from nucleus [GO:0016973]; telomere maintenance [GO:0000723]	chromosome, telomeric region [GO:0000781]; cytoplasm [GO:0005737]; cytoplasmic stress granule [GO:0010494]; cytosol [GO:0005829]; nucleus [GO:0005634]; P-body [GO:0000932]	chromosome, telomeric region [GO:0000781]; cytoplasm [GO:0005737]; cytoplasmic stress granule [GO:0010494]; cytosol [GO:0005829]; nucleus [GO:0005634]; P-body [GO:0000932]; chromatin binding [GO:0003682]; mRNA binding [GO:0003729]; single-stranded telomeric DNA binding [GO:0043047]; nuclear mRNA surveillance [GO:0071028]; poly(A)+ mRNA export from nucleus [GO:0016973]; telomere maintenance [GO:00…	SUBCELLULAR LOCATION: Cytoplasm {ECO:0000269|PubMed:14676199, ECO:0000269|PubMed:22932476, ECO:0000269|PubMed:24452287}. Nucleus {ECO:0000269|PubMed:12634846, ECO:0000269|PubMed:14676199, ECO:0000269|PubMed:22932476, ECO:0000269|PubMed:24452287}. Chromosome, telomere {ECO:0000305|PubMed:7800479}. Cytoplasm, P-body {ECO:0000269|PubMed:18981231}. Cytoplasm, Stress granule {ECO:0000269|PubMed:189812…			chromatin binding [GO:0003682]; mRNA binding [GO:0003729]; single-stranded telomeric DNA binding [GO:0043047]	GO:0000723; GO:0000781; GO:0000932; GO:0003682; GO:0003729; GO:0005634; GO:0005737; GO:0005829; GO:0010494; GO:0016973; GO:0043047; GO:0071028	FALSE	0
P33327	P33327	reviewed	DHE2_YEAST	NAD-specific glutamate dehydrogenase (NAD-GDH) (EC 1.4.1.2)	GDH2 YDL215C D0892	Saccharomyces cerevisiae (strain ATCC 204508 / S288c) (Baker's yeast)	1092	glutamate catabolic process [GO:0006538]; glutamate catabolic process to 2-oxoglutarate [GO:0019551]; nitrogen compound metabolic process [GO:0006807]	mitochondrion [GO:0005739]	mitochondrion [GO:0005739]; glutamate dehydrogenase (NAD+) activity [GO:0004352]; glutamate catabolic process [GO:0006538]; glutamate catabolic process to 2-oxoglutarate [GO:0019551]; nitrogen compound metabolic process [GO:0006807]				glutamate dehydrogenase (NAD+) activity [GO:0004352]	GO:0004352; GO:0005739; GO:0006538; GO:0006807; GO:0019551	FALSE	0
Q00764	Q00764	reviewed	TPS1_YEAST	Alpha,alpha-trehalose-phosphate synthase [UDP-forming] 56 kDa subunit (EC 2.4.1.15) (General glucose sensor subunit 1) (Glycogen metabolism control protein GLC6) (Trehalose synthase complex catalytic subunit TPS1) (Trehalose-6-phosphate synthase) (UDP-glucose-glucosephosphate glucosyltransferase)	TPS1 BYP1 CIF1 FDP1 GGS1 GLC6 TSS1 YBR126C YBR0922	Saccharomyces cerevisiae (strain ATCC 204508 / S288c) (Baker's yeast)	495	carbohydrate metabolic process [GO:0005975]; cellular response to desiccation [GO:0071465]; cellular response to heat [GO:0034605]; trehalose biosynthetic process [GO:0005992]; trehalose metabolism in response to stress [GO:0070413]	alpha,alpha-trehalose-phosphate synthase complex (UDP-forming) [GO:0005946]; cytoplasm [GO:0005737]	alpha,alpha-trehalose-phosphate synthase complex (UDP-forming) [GO:0005946]; cytoplasm [GO:0005737]; alpha,alpha-trehalose-phosphate synthase (UDP-forming) activity [GO:0003825]; trehalose-phosphatase activity [GO:0004805]; carbohydrate metabolic process [GO:0005975]; cellular response to desiccation [GO:0071465]; cellular response to heat [GO:0034605]; trehalose biosynthetic process [GO:0005992]…	SUBCELLULAR LOCATION: Cytoplasm {ECO:0000269|PubMed:14562095}.			alpha,alpha-trehalose-phosphate synthase (UDP-forming) activity [GO:0003825]; trehalose-phosphatase activity [GO:0004805]	GO:0003825; GO:0004805; GO:0005737; GO:0005946; GO:0005975; GO:0005992; GO:0034605; GO:0070413; GO:0071465	FALSE	0
P53327	P53327	reviewed	SLH1_YEAST	RQC trigger complex helicase SLH1 (EC 3.6.4.13) (Antiviral helicase SLH1) (SKI2-like helicase 1)	SLH1 RQT2 YGR271W G9365	Saccharomyces cerevisiae (strain ATCC 204508 / S288c) (Baker's yeast)	1967	cytoplasmic translation [GO:0002181]; defense response to virus [GO:0051607]; regulation of translation [GO:0006417]; rescue of stalled ribosome [GO:0072344]; ribosome disassembly [GO:0032790]; ribosome-associated ubiquitin-dependent protein catabolic process [GO:1990116]	cytoplasm [GO:0005737]; cytoplasmic stress granule [GO:0010494]; cytosolic ribosome [GO:0022626]	cytoplasm [GO:0005737]; cytoplasmic stress granule [GO:0010494]; cytosolic ribosome [GO:0022626]; ATP binding [GO:0005524]; ATP hydrolysis activity [GO:0016887]; helicase activity [GO:0004386]; mRNA binding [GO:0003729]; RNA helicase activity [GO:0003724]; cytoplasmic translation [GO:0002181]; defense response to virus [GO:0051607]; regulation of translation [GO:0006417]; rescue of stalled riboso…	SUBCELLULAR LOCATION: Cytoplasm, cytosol {ECO:0000269|PubMed:14562095}.			ATP binding [GO:0005524]; ATP hydrolysis activity [GO:0016887]; helicase activity [GO:0004386]; mRNA binding [GO:0003729]; RNA helicase activity [GO:0003724]	GO:0002181; GO:0003724; GO:0003729; GO:0004386; GO:0005524; GO:0005737; GO:0006417; GO:0010494; GO:0016887; GO:0022626; GO:0032790; GO:0051607; GO:0072344; GO:1990116	FALSE	0
P33399	P33399	reviewed	LHP1_YEAST	La protein homolog (La autoantigen homolog) (La ribonucleoprotein)	LHP1 LAH1 YLA1 YDL051W	Saccharomyces cerevisiae (strain ATCC 204508 / S288c) (Baker's yeast)	275	tRNA processing [GO:0008033]	nucleolus [GO:0005730]; nucleoplasm [GO:0005654]; nucleus [GO:0005634]; polysome [GO:0005844]	nucleolus [GO:0005730]; nucleoplasm [GO:0005654]; nucleus [GO:0005634]; polysome [GO:0005844]; mRNA binding [GO:0003729]; RNA binding [GO:0003723]; tRNA binding [GO:0000049]; U6 snRNA binding [GO:0017070]; tRNA processing [GO:0008033]	SUBCELLULAR LOCATION: Nucleus {ECO:0000269|PubMed:10564276, ECO:0000269|PubMed:9412461, ECO:0000269|PubMed:9817748}. Note=Imported into nucleus by the nuclear transport factor SXM1.			mRNA binding [GO:0003729]; RNA binding [GO:0003723]; tRNA binding [GO:0000049]; U6 snRNA binding [GO:0017070]	GO:0000049; GO:0003723; GO:0003729; GO:0005634; GO:0005654; GO:0005730; GO:0005844; GO:0008033; GO:0017070	FALSE	0
P09119	P09119	reviewed	CDC6_YEAST	Cell division control protein 6	CDC6 YJL194W J0347	Saccharomyces cerevisiae (strain ATCC 204508 / S288c) (Baker's yeast)	513	cell division [GO:0051301]; DNA replication initiation [GO:0006270]; G1/S transition of mitotic cell cycle [GO:0000082]; mitotic DNA replication checkpoint signaling [GO:0033314]; pre-replicative complex assembly involved in nuclear cell cycle DNA replication [GO:0006267]; regulation of DNA-templated DNA replication initiation [GO:0030174]	chromosome [GO:0005694]; cytoplasm [GO:0005737]; DNA replication preinitiation complex [GO:0031261]; nuclear pre-replicative complex [GO:0005656]; nucleoplasm [GO:0005654]; nucleus [GO:0005634]	chromosome [GO:0005694]; cytoplasm [GO:0005737]; DNA replication preinitiation complex [GO:0031261]; nuclear pre-replicative complex [GO:0005656]; nucleoplasm [GO:0005654]; nucleus [GO:0005634]; ATP binding [GO:0005524]; ATP hydrolysis activity [GO:0016887]; chromatin binding [GO:0003682]; DNA replication origin binding [GO:0003688]; GTP binding [GO:0005525]; GTPase activity [GO:0003924]; cell di…	SUBCELLULAR LOCATION: Nucleus. Chromosome.			ATP binding [GO:0005524]; ATP hydrolysis activity [GO:0016887]; chromatin binding [GO:0003682]; DNA replication origin binding [GO:0003688]; GTP binding [GO:0005525]; GTPase activity [GO:0003924]	GO:0000082; GO:0003682; GO:0003688; GO:0003924; GO:0005524; GO:0005525; GO:0005634; GO:0005654; GO:0005656; GO:0005694; GO:0005737; GO:0006267; GO:0006270; GO:0016887; GO:0030174; GO:0031261; GO:0033314; GO:0051301	FALSE	0

## Sheet: Enriched in WATER
From	Entry	Reviewed	Entry Name	Protein names	Gene Names	Organism	Length	Gene Ontology (biological process)	Gene Ontology (cellular component)	Gene Ontology (GO)	Subcellular location [CC]	Transmembrane	Gene Ontology (molecular function)	Gene Ontology IDs		MEMBRANE	# transmembrane segments
P39004	P39004	reviewed	HXT7_YEAST	High-affinity hexose transporter HXT7	HXT7 YDR342C D9651.11	Saccharomyces cerevisiae (strain ATCC 204508 / S288c) (Baker's yeast)	570	carbohydrate transport [GO:0008643]; glucose transmembrane transport [GO:1904659]; hexose transmembrane transport [GO:0008645]; transmembrane transport [GO:0055085]	cell periphery [GO:0071944]; mitochondrion [GO:0005739]; plasma membrane [GO:0005886]	cell periphery [GO:0071944]; mitochondrion [GO:0005739]; plasma membrane [GO:0005886]; carbohydrate:proton symporter activity [GO:0005351]; fructose transmembrane transporter activity [GO:0005353]; glucose transmembrane transporter activity [GO:0005355]; mannose transmembrane transporter activity [GO:0015578]; pentose transmembrane transporter activity [GO:0015146]; carbohydrate transport [GO:000…	SUBCELLULAR LOCATION: Membrane; Multi-pass membrane protein.	TRANSMEM 61..81; /note="Helical; Name=1"; /evidence="ECO:0000255"; TRANSMEM 117..137; /note="Helical; Name=2"; /evidence="ECO:0000255"; TRANSMEM 144..164; /note="Helical; Name=3"; /evidence="ECO:0000255"; TRANSMEM 175..195; /note="Helical; Name=4"; /evidence="ECO:0000255"; TRANSMEM 202..222; /note="Helical; Name=5"; /evidence="ECO:0000255"; TRANSMEM 237..257; /note="Helical; Name=6"; /evidence="E…	carbohydrate:proton symporter activity [GO:0005351]; fructose transmembrane transporter activity [GO:0005353]; glucose transmembrane transporter activity [GO:0005355]; mannose transmembrane transporter activity [GO:0015578]; pentose transmembrane transporter activity [GO:0015146]	GO:0005351; GO:0005353; GO:0005355; GO:0005739; GO:0005886; GO:0008643; GO:0008645; GO:0015146; GO:0015578; GO:0055085; GO:0071944; GO:1904659		TRUE	12
Q04835	Q04835	reviewed	YM87_YEAST	Uncharacterized membrane protein YMR253C	YMR253C YM9920.07C	Saccharomyces cerevisiae (strain ATCC 204508 / S288c) (Baker's yeast)	414		cytoplasm [GO:0005737]; membrane [GO:0016020]	cytoplasm [GO:0005737]; membrane [GO:0016020]	SUBCELLULAR LOCATION: Membrane {ECO:0000269|PubMed:14562095}; Multi-pass membrane protein {ECO:0000269|PubMed:14562095}. Note=Localizes to cytoplasmic punctate structures.	TRANSMEM 67..87; /note="Helical"; /evidence="ECO:0000255"; TRANSMEM 107..127; /note="Helical"; /evidence="ECO:0000255"; TRANSMEM 145..167; /note="Helical"; /evidence="ECO:0000255"; TRANSMEM 172..191; /note="Helical"; /evidence="ECO:0000255"; TRANSMEM 200..220; /note="Helical"; /evidence="ECO:0000255"; TRANSMEM 242..262; /note="Helical"; /evidence="ECO:0000255"; TRANSMEM 270..290; /note="Helical";…		GO:0005737; GO:0016020		TRUE	9
P19657	P19657	reviewed	PMA2_YEAST	Plasma membrane ATPase 2 (EC 7.1.2.1) (Proton pump 2)	PMA2 YPL036W	Saccharomyces cerevisiae (strain ATCC 204508 / S288c) (Baker's yeast)	947	proton export across plasma membrane [GO:0120029]; proton transmembrane transport [GO:1902600]; regulation of intracellular pH [GO:0051453]	cell periphery [GO:0071944]; mitochondrion [GO:0005739]; plasma membrane [GO:0005886]	cell periphery [GO:0071944]; mitochondrion [GO:0005739]; plasma membrane [GO:0005886]; ATP binding [GO:0005524]; ATP hydrolysis activity [GO:0016887]; metal ion binding [GO:0046872]; P-type proton-exporting transporter activity [GO:0008553]; proton export across plasma membrane [GO:0120029]; proton transmembrane transport [GO:1902600]; regulation of intracellular pH [GO:0051453]	SUBCELLULAR LOCATION: Cell membrane; Multi-pass membrane protein.	TRANSMEM 145..165; /note="Helical; Name=1"; /evidence="ECO:0000255"; TRANSMEM 170..189; /note="Helical; Name=2"; /evidence="ECO:0000255"; TRANSMEM 321..342; /note="Helical; Name=3"; /evidence="ECO:0000255"; TRANSMEM 354..376; /note="Helical; Name=4"; /evidence="ECO:0000255"; TRANSMEM 749..767; /note="Helical; Name=5"; /evidence="ECO:0000255"; TRANSMEM 784..803; /note="Helical; Name=6"; /evidence=…	ATP binding [GO:0005524]; ATP hydrolysis activity [GO:0016887]; metal ion binding [GO:0046872]; P-type proton-exporting transporter activity [GO:0008553]	GO:0005524; GO:0005739; GO:0005886; GO:0008553; GO:0016887; GO:0046872; GO:0051453; GO:0071944; GO:0120029; GO:1902600		TRUE	8
P34240	P34240	reviewed	ZRT3_YEAST	Zinc-regulated transporter 3 (Vacuolar membrane zinc transporter)	ZRT3 YKL175W YKL640	Saccharomyces cerevisiae (strain ATCC 204508 / S288c) (Baker's yeast)	503	intracellular zinc ion homeostasis [GO:0006882]; zinc ion transmembrane transport [GO:0071577]; zinc ion transport [GO:0006829]	endoplasmic reticulum [GO:0005783]; fungal-type vacuole membrane [GO:0000329]	endoplasmic reticulum [GO:0005783]; fungal-type vacuole membrane [GO:0000329]; zinc ion transmembrane transporter activity [GO:0005385]; intracellular zinc ion homeostasis [GO:0006882]; zinc ion transmembrane transport [GO:0071577]; zinc ion transport [GO:0006829]	SUBCELLULAR LOCATION: Vacuole membrane {ECO:0000269|PubMed:10856230}; Multi-pass membrane protein {ECO:0000269|PubMed:10856230}.	TRANSMEM 8..28; /note="Helical"; /evidence="ECO:0000255"; TRANSMEM 42..62; /note="Helical"; /evidence="ECO:0000255"; TRANSMEM 75..95; /note="Helical"; /evidence="ECO:0000255"; TRANSMEM 336..356; /note="Helical"; /evidence="ECO:0000255"; TRANSMEM 371..391; /note="Helical"; /evidence="ECO:0000255"; TRANSMEM 398..418; /note="Helical"; /evidence="ECO:0000255"; TRANSMEM 438..458; /note="Helical"; /evi…	zinc ion transmembrane transporter activity [GO:0005385]	GO:0000329; GO:0005385; GO:0005783; GO:0006829; GO:0006882; GO:0071577		TRUE	8
P40319	P40319	reviewed	ELO3_YEAST	Elongation of fatty acids protein 3 (EC 2.3.1.199) (3-keto acyl-CoA synthase ELO3) (Affecting plasma membrane ATPase activity protein 1) (Suppressor of RAD3 essential function protein 1) (Suppressor of Rvs161 and Rvs167 mutations protein 4) (Very-long-chain 3-oxoacyl-CoA synthase 3) (v-SNARE bypass mutant gene 1 protein)	ELO3 APA1 SRE1 SUR4 VBM1 YLR372W L8039.2	Saccharomyces cerevisiae (strain ATCC 204508 / S288c) (Baker's yeast)	345	fatty acid biosynthetic process [GO:0006633]; fatty acid elongation [GO:0030497]; fatty acid elongation, monounsaturated fatty acid [GO:0034625]; fatty acid elongation, polyunsaturated fatty acid [GO:0034626]; fatty acid elongation, saturated fatty acid [GO:0019367]; late endosome to vacuole transport via multivesicular body sorting pathway [GO:0032511]; post-Golgi vesicle-mediated transport [GO:…	endoplasmic reticulum [GO:0005783]; endoplasmic reticulum membrane [GO:0005789]	endoplasmic reticulum [GO:0005783]; endoplasmic reticulum membrane [GO:0005789]; fatty acid elongase activity [GO:0009922]; fatty acid biosynthetic process [GO:0006633]; fatty acid elongation [GO:0030497]; fatty acid elongation, monounsaturated fatty acid [GO:0034625]; fatty acid elongation, polyunsaturated fatty acid [GO:0034626]; fatty acid elongation, saturated fatty acid [GO:0019367]; late en…	SUBCELLULAR LOCATION: Endoplasmic reticulum membrane {ECO:0000269|PubMed:12087109, ECO:0000269|PubMed:14562095, ECO:0000269|PubMed:9832547}; Multi-pass membrane protein {ECO:0000305}.	TRANSMEM 74..94; /note="Helical; Name=1"; /evidence="ECO:0000255"; TRANSMEM 106..126; /note="Helical; Name=2"; /evidence="ECO:0000255"; TRANSMEM 156..176; /note="Helical; Name=3"; /evidence="ECO:0000255"; TRANSMEM 181..201; /note="Helical; Name=4"; /evidence="ECO:0000255"; TRANSMEM 208..228; /note="Helical; Name=5"; /evidence="ECO:0000255"; TRANSMEM 243..263; /note="Helical; Name=6"; /evidence="E…	fatty acid elongase activity [GO:0009922]	GO:0005783; GO:0005789; GO:0006633; GO:0006892; GO:0009922; GO:0019367; GO:0030148; GO:0030497; GO:0032511; GO:0034625; GO:0034626; GO:0042761		TRUE	7
P33775	P33775	reviewed	PMT1_YEAST	Dolichyl-phosphate-mannose--protein mannosyltransferase 1 (EC 2.4.1.109)	PMT1 YDL095W D2390	Saccharomyces cerevisiae (strain ATCC 204508 / S288c) (Baker's yeast)	817	ER-associated misfolded protein catabolic process [GO:0071712]; fungal-type cell wall biogenesis [GO:0009272]; protein exit from endoplasmic reticulum [GO:0032527]; protein O-linked mannosylation [GO:0035269]; regulation of endoplasmic reticulum unfolded protein response [GO:1900101]	dolichyl-phosphate-mannose-protein mannosyltransferase Pmt1p-Pmt2p dimer complex [GO:0097582]; dolichyl-phosphate-mannose-protein mannosyltransferase Pmt1p-Pmt3p dimer complex [GO:0097583]; endoplasmic reticulum [GO:0005783]; endoplasmic reticulum membrane [GO:0005789]	dolichyl-phosphate-mannose-protein mannosyltransferase Pmt1p-Pmt2p dimer complex [GO:0097582]; dolichyl-phosphate-mannose-protein mannosyltransferase Pmt1p-Pmt3p dimer complex [GO:0097583]; endoplasmic reticulum [GO:0005783]; endoplasmic reticulum membrane [GO:0005789]; dolichyl-phosphate-mannose-protein mannosyltransferase activity [GO:0004169]; ER-associated misfolded protein catabolic process …	SUBCELLULAR LOCATION: Endoplasmic reticulum membrane {ECO:0000303|PubMed:10085156}; Multi-pass membrane protein {ECO:0000269|PubMed:10085156}.	TRANSMEM 51..70; /note="Helical"; /evidence="ECO:0000269|PubMed:10085156"; TRANSMEM 136..154; /note="Helical"; /evidence="ECO:0000269|PubMed:10085156"; TRANSMEM 180..200; /note="Helical"; /evidence="ECO:0000269|PubMed:10085156"; TRANSMEM 235..259; /note="Helical"; /evidence="ECO:0000269|PubMed:10085156"; TRANSMEM 274..291; /note="Helical"; /evidence="ECO:0000269|PubMed:10085156"; TRANSMEM 585..60…	dolichyl-phosphate-mannose-protein mannosyltransferase activity [GO:0004169]	GO:0004169; GO:0005783; GO:0005789; GO:0009272; GO:0032527; GO:0035269; GO:0071712; GO:0097582; GO:0097583; GO:1900101		TRUE	7
Q08417	Q08417	reviewed	RSB1_YEAST	Sphingoid long-chain base transporter RSB1	RSB1 YOR049C O2787	Saccharomyces cerevisiae (strain ATCC 204508 / S288c) (Baker's yeast)	382	phospholipid translocation [GO:0045332]; sphingoid long-chain base transport [GO:1905329]	cell periphery [GO:0071944]; endoplasmic reticulum [GO:0005783]; fungal-type vacuole [GO:0000324]; membrane [GO:0016020]; plasma membrane [GO:0005886]	cell periphery [GO:0071944]; endoplasmic reticulum [GO:0005783]; fungal-type vacuole [GO:0000324]; membrane [GO:0016020]; plasma membrane [GO:0005886]; phospholipid translocation [GO:0045332]; sphingoid long-chain base transport [GO:1905329]	SUBCELLULAR LOCATION: Cell membrane {ECO:0000269|PubMed:16407254, ECO:0000305|PubMed:24146988}; Multi-pass membrane protein {ECO:0000269|PubMed:16407254}.	TRANSMEM 35..55; /note="Helical"; /evidence="ECO:0000255"; TRANSMEM 58..78; /note="Helical"; /evidence="ECO:0000255"; TRANSMEM 91..111; /note="Helical"; /evidence="ECO:0000255"; TRANSMEM 136..156; /note="Helical"; /evidence="ECO:0000255"; TRANSMEM 172..192; /note="Helical"; /evidence="ECO:0000255"; TRANSMEM 242..262; /note="Helical"; /evidence="ECO:0000255"; TRANSMEM 282..302; /note="Helical"; /e…		GO:0000324; GO:0005783; GO:0005886; GO:0016020; GO:0045332; GO:0071944; GO:1905329		TRUE	7
Q99190	Q99190	reviewed	TECR_YEAST	Very-long-chain enoyl-CoA reductase (EC 1.3.1.93) (Enoyl reductase TSC13) (Temperature-sensitive CSG2 suppressor protein 13) (Trans-2-enoyl-CoA reductase)	TSC13 YDL015C D2865	Saccharomyces cerevisiae (strain ATCC 204508 / S288c) (Baker's yeast)	310	very long-chain fatty acid biosynthetic process [GO:0042761]; very long-chain fatty acid metabolic process [GO:0000038]	endoplasmic reticulum [GO:0005783]; endoplasmic reticulum membrane [GO:0005789]; mitochondrion [GO:0005739]	endoplasmic reticulum [GO:0005783]; endoplasmic reticulum membrane [GO:0005789]; mitochondrion [GO:0005739]; oxidoreductase activity [GO:0016491]; very-long-chain enoyl-CoA reductase activity [GO:0102758]; very long-chain fatty acid biosynthetic process [GO:0042761]; very long-chain fatty acid metabolic process [GO:0000038]	SUBCELLULAR LOCATION: Endoplasmic reticulum membrane {ECO:0000269|PubMed:11113186, ECO:0000269|PubMed:14562095, ECO:0000269|PubMed:15958487}; Multi-pass membrane protein {ECO:0000269|PubMed:11113186, ECO:0000269|PubMed:14562095, ECO:0000269|PubMed:15958487}. Note=Accumulates at nucleus-vacuole (NV) junctions. Sequestred to NV junctions by NVJ1. Accumulates in nuclear PMN bleps and vesicles during…	TRANSMEM 86..106; /note="Helical"; /evidence="ECO:0000255"; TRANSMEM 142..162; /note="Helical"; /evidence="ECO:0000255"; TRANSMEM 166..186; /note="Helical"; /evidence="ECO:0000255"; TRANSMEM 202..222; /note="Helical"; /evidence="ECO:0000255"; TRANSMEM 243..265; /note="Helical"; /evidence="ECO:0000255"; TRANSMEM 269..291; /note="Helical"; /evidence="ECO:0000255"	oxidoreductase activity [GO:0016491]; very-long-chain enoyl-CoA reductase activity [GO:0102758]	GO:0000038; GO:0005739; GO:0005783; GO:0005789; GO:0016491; GO:0042761; GO:0102758		TRUE	6
P32564	P32564	reviewed	SCM4_YEAST	Protein SCM4 (Suppressor of CDC4 mutation 4)	SCM4 YGR049W	Saccharomyces cerevisiae (strain ATCC 204508 / S288c) (Baker's yeast)	187	autophagy of mitochondrion [GO:0000422]	mitochondrial outer membrane [GO:0005741]; mitochondrion [GO:0005739]	mitochondrial outer membrane [GO:0005741]; mitochondrion [GO:0005739]; autophagy of mitochondrion [GO:0000422]	SUBCELLULAR LOCATION: Membrane {ECO:0000305}; Multi-pass membrane protein {ECO:0000305}.	TRANSMEM 11..31; /note="Helical"; /evidence="ECO:0000255"; TRANSMEM 45..65; /note="Helical"; /evidence="ECO:0000255"; TRANSMEM 80..100; /note="Helical"; /evidence="ECO:0000255"; TRANSMEM 162..182; /note="Helical"; /evidence="ECO:0000255"		GO:0000422; GO:0005739; GO:0005741		TRUE	4
Q06689	Q06689	reviewed	YL413_YEAST	Cell membrane protein YLR413W	YLR413W	Saccharomyces cerevisiae (strain ATCC 204508 / S288c) (Baker's yeast)	675	fungal-type cell wall organization [GO:0031505]	cell cortex of cell tip [GO:0051285]; cell periphery [GO:0071944]; fungal-type vacuole [GO:0000324]; plasma membrane [GO:0005886]	cell cortex of cell tip [GO:0051285]; cell periphery [GO:0071944]; fungal-type vacuole [GO:0000324]; plasma membrane [GO:0005886]; fungal-type cell wall organization [GO:0031505]	SUBCELLULAR LOCATION: Cell membrane {ECO:0000305}; Multi-pass membrane protein {ECO:0000305}.	TRANSMEM 533..553; /note="Helical"; /evidence="ECO:0000255"; TRANSMEM 569..589; /note="Helical"; /evidence="ECO:0000255"; TRANSMEM 611..631; /note="Helical"; /evidence="ECO:0000255"		GO:0000324; GO:0005886; GO:0031505; GO:0051285; GO:0071944		TRUE	3
P53633	P53633	reviewed	PRA1_YEAST	Prenylated Rab acceptor 1	YIP3 PRA1 YNL044W N2650	Saccharomyces cerevisiae (strain ATCC 204508 / S288c) (Baker's yeast)	176	endoplasmic reticulum to Golgi vesicle-mediated transport [GO:0006888]	COPII-coated ER to Golgi transport vesicle [GO:0030134]; endoplasmic reticulum [GO:0005783]; Golgi apparatus [GO:0005794]; Golgi membrane [GO:0000139]; peroxisomal membrane [GO:0005778]	COPII-coated ER to Golgi transport vesicle [GO:0030134]; endoplasmic reticulum [GO:0005783]; Golgi apparatus [GO:0005794]; Golgi membrane [GO:0000139]; peroxisomal membrane [GO:0005778]; endoplasmic reticulum to Golgi vesicle-mediated transport [GO:0006888]	SUBCELLULAR LOCATION: Golgi apparatus membrane {ECO:0000269|PubMed:14562095}; Multi-pass membrane protein {ECO:0000269|PubMed:14562095}. Peroxisome membrane {ECO:0000305|PubMed:35563734}; Multi-pass membrane protein {ECO:0000255}. Note=Peroxisomal localization is dependent on PEX5. {ECO:0000269|PubMed:35563734}.	TRANSMEM 84..104; /note="Helical"; /evidence="ECO:0000255"; TRANSMEM 129..149; /note="Helical"; /evidence="ECO:0000255"		GO:0000139; GO:0005778; GO:0005783; GO:0005794; GO:0006888; GO:0030134		TRUE	2
P40098	P40098	reviewed	FMP10_YEAST	Uncharacterized mitochondrial membrane protein FMP10	FMP10 YER182W	Saccharomyces cerevisiae (strain ATCC 204508 / S288c) (Baker's yeast)	244		mitochondrial membrane [GO:0031966]; mitochondrion [GO:0005739]	mitochondrial membrane [GO:0031966]; mitochondrion [GO:0005739]	SUBCELLULAR LOCATION: Mitochondrion membrane {ECO:0000305}; Multi-pass membrane protein {ECO:0000305}.	TRANSMEM 29..49; /note="Helical"; /evidence="ECO:0000255"; TRANSMEM 139..159; /note="Helical"; /evidence="ECO:0000255"		GO:0005739; GO:0031966		TRUE	2
Q02969	Q02969	reviewed	PEX25_YEAST	Peroxisomal membrane protein PEX25 (Peroxin-25)	PEX25 YPL112C	Saccharomyces cerevisiae (strain ATCC 204508 / S288c) (Baker's yeast)	394	peroxisome fission [GO:0016559]; peroxisome organization [GO:0007031]; protein import into peroxisome matrix [GO:0016558]; regulation of peroxisome size [GO:0044375]	peroxisomal membrane [GO:0005778]; peroxisome [GO:0005777]	peroxisomal membrane [GO:0005778]; peroxisome [GO:0005777]; peroxisome fission [GO:0016559]; peroxisome organization [GO:0007031]; protein import into peroxisome matrix [GO:0016558]; regulation of peroxisome size [GO:0044375]	SUBCELLULAR LOCATION: Peroxisome membrane {ECO:0000269|PubMed:12135984, ECO:0000269|PubMed:14517338, ECO:0000269|PubMed:14562095, ECO:0000269|PubMed:15596542}; Single-pass membrane protein {ECO:0000269|PubMed:12135984, ECO:0000269|PubMed:14517338, ECO:0000269|PubMed:14562095, ECO:0000269|PubMed:15596542}.	TRANSMEM 367..383; /note="Helical"; /evidence="ECO:0000255"		GO:0005777; GO:0005778; GO:0007031; GO:0016558; GO:0016559; GO:0044375		TRUE	1
P36169	P36169	reviewed	SKG1_YEAST	Suppressor of lethality of KEX2 GAS1 double null mutant protein 1	SKG1 YKR100C YKR099C-A	Saccharomyces cerevisiae (strain ATCC 204508 / S288c) (Baker's yeast)	355	fungal-type cell wall organization [GO:0031505]	cellular bud [GO:0005933]; cellular bud membrane [GO:0033101]; cellular bud tip [GO:0005934]; incipient cellular bud site [GO:0000131]	cellular bud [GO:0005933]; cellular bud membrane [GO:0033101]; cellular bud tip [GO:0005934]; incipient cellular bud site [GO:0000131]; fungal-type cell wall organization [GO:0031505]	SUBCELLULAR LOCATION: Cell membrane; Single-pass type III membrane protein; Cytoplasmic side. Bud membrane; Single-pass type III membrane protein; Cytoplasmic side. Note=Localizes on the inner surface of the plasma membrane at the bud and in the daughter cell. Localizes at an incipient bud site in the cells with emerging buds, a bud tip in small- or medium-budded cells, and a cell periphery in la…	TRANSMEM 9..29; /note="Helical; Signal-anchor for type III membrane protein"; /evidence="ECO:0000255"		GO:0000131; GO:0005933; GO:0005934; GO:0031505; GO:0033101		TRUE	1
P52870	P52870	reviewed	SC6B1_YEAST	Protein transport protein SBH1 (Sec61 complex subunit SBH1) (Sec61 complex subunit beta)	SBH1 SEB1 YER087C-B YER087BC	Saccharomyces cerevisiae (strain ATCC 204508 / S288c) (Baker's yeast)	82	post-translational protein targeting to membrane, translocation [GO:0031204]; SRP-dependent cotranslational protein targeting to membrane, translocation [GO:0006616]	cytosol [GO:0005829]; endoplasmic reticulum [GO:0005783]; endoplasmic reticulum membrane [GO:0005789]; membrane [GO:0016020]; rough endoplasmic reticulum membrane [GO:0030867]; Sec61 translocon complex [GO:0005784]; translocon complex [GO:0071256]	cytosol [GO:0005829]; endoplasmic reticulum [GO:0005783]; endoplasmic reticulum membrane [GO:0005789]; membrane [GO:0016020]; rough endoplasmic reticulum membrane [GO:0030867]; Sec61 translocon complex [GO:0005784]; translocon complex [GO:0071256]; guanyl-nucleotide exchange factor activity [GO:0005085]; protein transmembrane transporter activity [GO:0008320]; post-translational protein targeting…	SUBCELLULAR LOCATION: Endoplasmic reticulum membrane; Single-pass membrane protein.	TRANSMEM 54..74; /note="Helical"; /evidence="ECO:0000255"	guanyl-nucleotide exchange factor activity [GO:0005085]; protein transmembrane transporter activity [GO:0008320]	GO:0005085; GO:0005783; GO:0005784; GO:0005789; GO:0005829; GO:0006616; GO:0008320; GO:0016020; GO:0030867; GO:0031204; GO:0071256		TRUE	1
P33448	P33448	reviewed	TOM6_YEAST	Mitochondrial import receptor subunit TOM6 (Mitochondrial import site protein ISP6) (Translocase of outer membrane 6 kDa subunit)	TOM6 ISP6 YOR045W	Saccharomyces cerevisiae (strain ATCC 204508 / S288c) (Baker's yeast)	61	mitochondrial outer membrane translocase complex assembly [GO:0070096]; protein import into mitochondrial matrix [GO:0030150]; protein insertion into mitochondrial outer membrane [GO:0045040]	mitochondrial outer membrane [GO:0005741]; mitochondrial outer membrane translocase complex [GO:0005742]; mitochondrion [GO:0005739]	mitochondrial outer membrane [GO:0005741]; mitochondrial outer membrane translocase complex [GO:0005742]; mitochondrion [GO:0005739]; mitochondrial outer membrane translocase complex assembly [GO:0070096]; protein import into mitochondrial matrix [GO:0030150]; protein insertion into mitochondrial outer membrane [GO:0045040]	SUBCELLULAR LOCATION: Mitochondrion outer membrane; Single-pass membrane protein.	TRANSMEM 32..52; /note="Helical"; /evidence="ECO:0000255"		GO:0005739; GO:0005741; GO:0005742; GO:0030150; GO:0045040; GO:0070096		TRUE	1
Q12160	Q12160	reviewed	YP063_YEAST	Uncharacterized protein YPR063C	YPR063C	Saccharomyces cerevisiae (strain ATCC 204508 / S288c) (Baker's yeast)	140		endoplasmic reticulum [GO:0005783]; endoplasmic reticulum membrane [GO:0005789]	endoplasmic reticulum [GO:0005783]; endoplasmic reticulum membrane [GO:0005789]	SUBCELLULAR LOCATION: Endoplasmic reticulum membrane {ECO:0000269|PubMed:14562095}; Single-pass membrane protein {ECO:0000269|PubMed:14562095}.	TRANSMEM 91..107; /note="Helical"; /evidence="ECO:0000255"		GO:0005783; GO:0005789		TRUE	1
P43620	P43620	reviewed	RMD8_YEAST	Sporulation protein RMD8 (Required for meiotic nuclear division protein 8)	RMD8 YFR048W	Saccharomyces cerevisiae (strain ATCC 204508 / S288c) (Baker's yeast)	662	meiotic cell cycle [GO:0051321]; sporulation resulting in formation of a cellular spore [GO:0030435]	cytoplasm [GO:0005737]; endoplasmic reticulum [GO:0005783]; membrane [GO:0016020]; mitochondrion [GO:0005739]	cytoplasm [GO:0005737]; endoplasmic reticulum [GO:0005783]; membrane [GO:0016020]; mitochondrion [GO:0005739]; meiotic cell cycle [GO:0051321]; sporulation resulting in formation of a cellular spore [GO:0030435]	SUBCELLULAR LOCATION: Membrane {ECO:0000305}; Single-pass membrane protein {ECO:0000305}.	TRANSMEM 630..647; /note="Helical"; /evidence="ECO:0000255"		GO:0005737; GO:0005739; GO:0005783; GO:0016020; GO:0030435; GO:0051321		TRUE	1
Q06011	Q06011	reviewed	ECM19_YEAST	Protein ECM19 (Extracellular mutant protein 19)	ECM19 YLR390W	Saccharomyces cerevisiae (strain ATCC 204508 / S288c) (Baker's yeast)	112	cell wall organization [GO:0071555]	mitochondrial membrane [GO:0031966]; mitochondrion [GO:0005739]	mitochondrial membrane [GO:0031966]; mitochondrion [GO:0005739]; cell wall organization [GO:0071555]	SUBCELLULAR LOCATION: Mitochondrion membrane {ECO:0000269|PubMed:16823961}; Single-pass membrane protein {ECO:0000269|PubMed:16823961}.	TRANSMEM 35..57; /note="Helical"; /evidence="ECO:0000255"		GO:0005739; GO:0031966; GO:0071555		TRUE	1
Q05164	Q05164	reviewed	HPF1_YEAST	Haze protective factor 1	HPF1 YOL155C AOF1001	Saccharomyces cerevisiae (strain ATCC 204508 / S288c) (Baker's yeast)	967	fungal-type cell wall organization [GO:0031505]	cell periphery [GO:0071944]; extracellular region [GO:0005576]; fungal-type cell wall [GO:0009277]; side of membrane [GO:0098552]	cell periphery [GO:0071944]; extracellular region [GO:0005576]; fungal-type cell wall [GO:0009277]; side of membrane [GO:0098552]; glucosidase activity [GO:0015926]; fungal-type cell wall organization [GO:0031505]	SUBCELLULAR LOCATION: Secreted, cell wall. Membrane; Lipid-anchor, GPI-anchor. Note=Covalently-linked GPI-modified cell wall protein (GPI-CWP), enriched at bud sites and their neighborhood.		glucosidase activity [GO:0015926]	GO:0005576; GO:0009277; GO:0015926; GO:0031505; GO:0071944; GO:0098552		TRUE	0
Q05518	Q05518	reviewed	PAL1_YEAST	Protein PAL1 (Pears and lemons protein 1)	PAL1 YDR348C	Saccharomyces cerevisiae (strain ATCC 204508 / S288c) (Baker's yeast)	499	endocytosis [GO:0006897]	cell cortex [GO:0005938]; cellular bud neck [GO:0005935]; cellular bud tip [GO:0005934]; cytoplasm [GO:0005737]; mating projection tip [GO:0043332]; plasma membrane [GO:0005886]	cell cortex [GO:0005938]; cellular bud neck [GO:0005935]; cellular bud tip [GO:0005934]; cytoplasm [GO:0005737]; mating projection tip [GO:0043332]; plasma membrane [GO:0005886]; endocytosis [GO:0006897]	SUBCELLULAR LOCATION: Cell membrane {ECO:0000269|PubMed:14562095, ECO:0000269|PubMed:22190733}; Peripheral membrane protein {ECO:0000269|PubMed:14562095, ECO:0000269|PubMed:22190733}. Note=Localizes to the cell periphery and the bud neck. Found at endocytic sites at the cell periphery during the early stages of endocytosis.			GO:0005737; GO:0005886; GO:0005934; GO:0005935; GO:0005938; GO:0006897; GO:0043332		TRUE	0
P00127	P00127	reviewed	QCR6_YEAST	Cytochrome b-c1 complex subunit 6, mitochondrial (Complex III subunit 6) (Complex III subunit VI) (Cytochrome c1 non-heme 17 kDa protein) (Mitochondrial hinge protein) (Ubiquinol-cytochrome c oxidoreductase subunit 6) (Ubiquinol-cytochrome c reductase 17 kDa protein)	QCR6 UCR6 YFR033C	Saccharomyces cerevisiae (strain ATCC 204508 / S288c) (Baker's yeast)	147	aerobic respiration [GO:0009060]; cellular respiration [GO:0045333]; mitochondrial electron transport, ubiquinol to cytochrome c [GO:0006122]; proton transmembrane transport [GO:1902600]	mitochondrial inner membrane [GO:0005743]; mitochondrial intermembrane space [GO:0005758]; mitochondrial respiratory chain complex III [GO:0005750]; mitochondrion [GO:0005739]; nuclear periphery [GO:0034399]	mitochondrial inner membrane [GO:0005743]; mitochondrial intermembrane space [GO:0005758]; mitochondrial respiratory chain complex III [GO:0005750]; mitochondrion [GO:0005739]; nuclear periphery [GO:0034399]; aerobic respiration [GO:0009060]; cellular respiration [GO:0045333]; mitochondrial electron transport, ubiquinol to cytochrome c [GO:0006122]; proton transmembrane transport [GO:1902600]	SUBCELLULAR LOCATION: Mitochondrion inner membrane {ECO:0000269|PubMed:18390544, ECO:0000269|PubMed:22984289, ECO:0000269|PubMed:30598554}; Peripheral membrane protein {ECO:0000269|PubMed:18390544, ECO:0000269|PubMed:30598554}; Intermembrane side {ECO:0000269|PubMed:18390544, ECO:0000269|PubMed:30598554}.			GO:0005739; GO:0005743; GO:0005750; GO:0005758; GO:0006122; GO:0009060; GO:0034399; GO:0045333; GO:1902600		TRUE	0
[truncated: 57 more rows]
